# Supplementary material for: A History and Atlas of the Human CD4+ T Helper Cell
Source: Preprints.org preprint supplement (doi:10.20944/preprints202307.2055.v1), 2023-07-31
Supplement: Supplementary file 1 [file supplementary]

## Sheet: DONOR DEMOGRAPHICS
	Age	Sex	% CD4 T Cells
Donor 1	40	F	0.9804
Donor 2	56	M	0.977
Donor 3	61	M	0.9721
Donor 4	65	M	0.9401
Donor 5	54	F	0.9716
Donor 6	59	M	0.9867
>10 million cells in 200uL 9M Urea, 50mM Tris, plus protease/phosphatase inhibitor
*Make Lysis Buffer Fresh each time
Recipe for 9M Urea + 50mM Tris lysis buffer
1. Add 27.027g Urea (60.06g/mol) to 20mL water
2. Add 2.5mL 1M Tris pH = 7.0
3. Stir vigourously
4. Adjust pH to 8.0 (solution should become clear)
5. Add water until final volume is 50mL
6. Mix
7. Add 1 protease/phosphatase inhibitor tablet to 10mL buffer
8. Add 200uL lysis buffer to 10 million cells
9. Mix and freeze at -80C

## Sheet: RAW COUNTS
Protein Group	Protein Ids	Protein Names	Genes	First Protein Description	Donor 1	Donor 2	Donor 3	Donor 4	Donor 5	Donor 6
P63261	P60709;P63261;A0A2R8Y793;A0A2R8YGF8;C9JUM1;C9JZR7;E7EVS6;G5E9R0;I3L1U9;I3L3I0;I3L3R2;I3L4N8;J3KT65;K7EM38	ACTG_HUMAN	ACTG1	Actin, cytoplasmic 2	944950000	872475000	888919000	857904000	803668000	886175000
P62805	P62805	H4_HUMAN	HIST4H4	Histone H4	753994000	655665000	613732000	702995000	825414000	661463000
Q8IUE6	P04908;P0C0S8;P16104;P20671;Q7L7L0;Q8IUE6;Q93077;Q96KK5;Q99878;Q9BTM1;A0A0U1RR32;A0A3B3IS11;H0YFX9;Q9BTM1-2;A0A0U1RRH7	H2A2B_HUMAN	HIST2H2AB	Histone H2A type 2-B	538371000	467310000	473540000	461280000	569197000	565098000
Q8N257	O60814;P06899;P23527;P33778;P57053;P58876;P62807;Q16778;Q5QNW6;Q8N257;Q93079;Q96A08;Q99877;Q99879;Q99880;Q5QNW6-2;U3KQK0	H2B3B_HUMAN	HIST3H2BB	Histone H2B type 3-B	582142000	490737000	417856000	466301000	577138000	605094000
P07737	P07737;K7EJ44	PROF1_HUMAN	PFN1	Profilin-1	276023000	258897000	232453000	249025000	261031000	260110000
P04406	P04406;E7EUT5;P04406-2	G3P_HUMAN	GAPDH	Glyceraldehyde-3-phosphate dehydrogenase	255245000	211405000	224985000	235873000	263877000	249113000
Q5TEC6	P68431;P84243;Q16695;Q5TEC6;Q6NXT2;Q71DI3;B4DEB1;K7EK07;K7EMV3;K7EP01;K7ES00	Q5TEC6_HUMAN	HIST2H3PS2	Histone H3	223689000	192766000	192653000	224331000	290387000	217385000
P06733	P06733;A0A2R8Y6G6;P06733-2	ENOA_HUMAN	ENO1	Alpha-enolase	210389000	165043000	171138000	211379000	246336000	222430000
P08670	P08670;B0YJC4	VIME_HUMAN	VIM	Vimentin	193976000	183117000	246699000	184185000	182810000	203024000
P62736	P62736;P63267;P68032;P68133;A6NL76;B8ZZJ2;C9JFL5;F6QUT6;F6UVQ4;F8WB63	ACTA_HUMAN	ACTA2	Actin, aortic smooth muscle	137864000	184559000	154321000	196544000	156055000	172531000
P13796	P13796;P13796-2	PLSL_HUMAN	LCP1	Plastin-2	169291000	147881000	165968000	142693000	154378000	158345000
P58876	P58876	H2B1D_HUMAN	HIST1H2BD	Histone H2B type 1-D	160056000	137763000	103056000	140162000	171078000	157714000
P26447	P26447	S10A4_HUMAN	S100A4	Protein S100-A4	143151000	119527000	141639000	112211000	81012900	121859000
P0C0S8;P20671;Q16777;Q6FI13;Q96KK5;Q99878;Q9BTM1	P04908;P0C0S8;P20671;Q16777;Q6FI13;Q7L7L0;Q93077;Q96KK5;Q99878;Q9BTM1;A0A0U1RR32;H0YFX9;A0A0U1RRH7	H2A1D_HUMAN;H2A1H_HUMAN;H2A1J_HUMAN;H2A1_HUMAN;H2A2A_HUMAN;H2A2C_HUMAN;H2AJ_HUMAN	H2AFJ;HIST1H2AD;HIST1H2AH;HIST1H2AJ;HIST1H2AM;HIST2H2AA4;HIST2H2AC	Histone H2A type 1	111228000	93087000	93152500	99202700	128633000	119321000
P07437	P07437;Q5JP53;Q5ST81	TBB5_HUMAN	TUBB	Tubulin beta chain	111817000	120970000	113446000	123266000	140761000	114905000
Q9BQE3	P0DPH7;P0DPH8;Q6PEY2;Q71U36;Q9BQE3;Q9NY65;A0A1W2PQM2;C9J2C0;F5H5D3;P0DPH7-2;Q71U36-2;Q9NY65-2;V9GZ17	TBA1C_HUMAN	TUBA1C	Tubulin alpha-1C chain	109296000	115281000	111633000	118792000	128061000	108354000
P68366;P68366-2	A6NHL2;P68363;P68366;Q71U36;Q9BQE3;A0A1W2PQM2;A6NHL2-2;F5H5D3;P68363-2;P68366-2;Q71U36-2	TBA4A-2_HUMAN;TBA4A_HUMAN	TUBA4A	Tubulin alpha-4A chain	104419000	106069000	99912900	109432000	119821000	104156000
Q9H299	Q9H299;Q5T123	SH3L3_HUMAN	SH3BGRL3	SH3 domain-binding glutamic acid-rich-like protein 3	105219000	97610800	117814000	105009000	95637600	103444000
P0DP23;P0DP24;P0DP25	P0DP23;P0DP24;P0DP25;E7EMB3;E7ETZ0;G3V361;H0Y7A7;Q96HY3	CALM1_HUMAN;CALM2_HUMAN;CALM3_HUMAN	CALM1;CALM2;CALM3	Calmodulin-1	106774000	90731900	76041000	66608600	69586700	61407700
P68371	P04350;P07437;P68371;Q5JP53;Q5ST81	TBB4B_HUMAN	TUBB4B	Tubulin beta-4B chain	92096200	93362200	82319500	92855300	108869000	91778500
P60174;P60174-1	P60174;P60174-1;P60174-4;U3KPZ0;U3KQF3	TPIS-1_HUMAN;TPIS_HUMAN	TPI1	Triosephosphate isomerase	82459000	72314700	69309700	77841900	97404500	88336900
P62937	P62937;C9J5S7;F8WE65	PPIA_HUMAN	PPIA	Peptidyl-prolyl cis-trans isomerase A	80163500	83100800	76513300	76763100	81508200	81787900
P68104	P68104;Q5VTE0;A0A087WV01;A0A087WVQ9;A6PW80;P68104-2;Q5JR01	EF1A1_HUMAN	EEF1A1	Elongation factor 1-alpha 1	61340900	59943100	71991000	89178400	77934900	75192200
P14174	P14174	MIF_HUMAN	MIF	Macrophage migration inhibitory factor	77274700	72928500	61447000	70650700	98933200	91532300
P09382	P09382;F8WEI7	LEG1_HUMAN	LGALS1	Galectin-1	76027100	63241700	79560900	74504400	82039300	76579200
P52566	P52566;F5H3P3;H0YGX7	GDIR2_HUMAN	ARHGDIB	Rho GDP-dissociation inhibitor 2	73250100	76726900	77581200	81358300	82088000	79947500
P00558	P00558;P00558-2	PGK1_HUMAN	PGK1	Phosphoglycerate kinase 1	66610600	53875900	52665500	60594700	87576300	76900900
P23528	P23528;Q9Y281;E9PK25;E9PLJ3;E9PP50;E9PQB7;G3V1A4;Q9Y281-3	COF1_HUMAN	CFL1	Cofilin-1	77872000	77481500	78339200	69424700	63228500	64396300
P61604	P61604;B8ZZ54	CH10_HUMAN	HSPE1	10 kDa heat shock protein, mitochondrial	70416200	66212900	57688900	77922800	68060600	78313000
P62328	P62328	TYB4_HUMAN	TMSB4X	Thymosin beta-4	61806300	75993700	80021600	86849500	83584900	75222200
P00338;P00338-3	P00338;P00338-3;P00338-4	LDHA-3_HUMAN;LDHA_HUMAN	LDHA	L-lactate dehydrogenase A chain	63541800	58142100	56695700	62022900	75933100	60308200
P07910-2	P07910;B2R5W2;B4DY08;G3V2D6;G3V2Q1;G3V4C1;G3V4W0;G3V555;G3V575;G3V576;G3V5V7;P07910-2;P07910-3;P07910-4	HNRPC-2_HUMAN	HNRNPC	Isoform of P07910, Isoform C1 of Heterogeneous nuclear ribonucleoproteins C1/C2	65995000	62487300	63462600	65540200	61840300	63577100
Q14019	Q14019	COTL1_HUMAN	COTL1	Coactosin-like protein	70654300	58809000	61567800	59351700	60511600	61717900
P04075	P04075;H3BR68;J3KPS3;P04075-2	ALDOA_HUMAN	ALDOA	Fructose-bisphosphate aldolase A	63538800	57559100	46904900	55217600	70713100	60875200
Q06830	Q06830;A0A0A0MSI0	PRDX1_HUMAN	PRDX1	Peroxiredoxin-1	69678100	62979900	63636500	61114000	50592500	56192700
P41091	P41091;Q2VIR3;Q2VIR3-2	IF2G_HUMAN	EIF2S3	Eukaryotic translation initiation factor 2 subunit 3	57063400	55375600	63182500	57439900	60948900	55012700
P22626	P22626;A0A087WUI2;P22626-2	ROA2_HUMAN	HNRNPA2B1	Heterogeneous nuclear ribonucleoproteins A2/B1	66896300	66040000	56105800	59487400	58412000	64193100
P14618	P14618;B4DNK4;H3BQ34;H3BTN5;P14618-2;P14618-3	KPYM_HUMAN	PKM	Pyruvate kinase PKM	49415200	48708500	57246200	60375000	70570900	60408300
P26038	P26038	MOES_HUMAN	MSN	Moesin	52679500	48452400	65171600	50380400	52923800	51868800
P11142	P11142;P54652;E9PK54;E9PKE3;E9PLF4;E9PN25;E9PN89;E9PPY6;E9PQK7;E9PQQ4;P11142-2	HSP7C_HUMAN	HSPA8	Heat shock cognate 71 kDa protein	55138900	51776600	54139500	58008900	50138000	52277300
P06576	P06576;F8W079;H0YH81	ATPB_HUMAN	ATP5F1B	ATP synthase subunit beta, mitochondrial	54628700	56856300	54555100	58246700	61229800	62772500
P19404	P19404;E7EPT4	NDUV2_HUMAN	NDUFV2	NADH dehydrogenase [ubiquinone] flavoprotein 2, mitochondrial	50304200	59158900	50162000	59473300	61476100	64305800
P10412	P10412;P16402;P16403	H14_HUMAN	HIST1H1E	Histone H1.4	40506400	31685100	24157500	33121300	79238600	37261500
P31146	P31146;H3BRY3	COR1A_HUMAN	CORO1A	Coronin-1A	55232200	47550400	57073300	46561300	47348800	47950200
P63104	P63104;B0AZS6;B7Z2E6;E7EX29;H0YB80;P63104-2	1433Z_HUMAN	YWHAZ	14-3-3 protein zeta/delta	53875200	52051800	56177700	51726300	50615400	55152200
P37802;P37802-2	P37802;P37802-2;X6RJP6	TAGL2-2_HUMAN;TAGL2_HUMAN	TAGLN2	Transgelin-2	55112700	47799800	48146100	52736200	58632700	50303800
P08758	P08758;D6RBE9;D6RBL5	ANXA5_HUMAN	ANXA5	Annexin A5	56920400	53945800	64248300	32325800	33842000	37324300
Q04917	Q04917;A2IDB2	1433F_HUMAN	YWHAH	14-3-3 protein eta	55470200	55094500	56690000	55940400	49849400	49197500
Q12931;Q12931-2	Q12931;I3L0K7;I3L239;I3L2D5;Q12931-2	TRAP1-2_HUMAN;TRAP1_HUMAN	TRAP1	Heat shock protein 75 kDa, mitochondrial	37389300	53825400	46102300	58172300	46630400	50140700
P08238	P08238	HS90B_HUMAN	HSP90AB1	Heat shock protein HSP 90-beta	49716500	49742600	44245200	52978000	48443400	49228700
P60660-2	P60660;B7Z6Z4;F8VPF3;F8VZU9;F8W180;F8W1R7;G3V1V0;G3V1Y7;G8JLA2;J3KND3;P60660-2	MYL6-2_HUMAN	MYL6	Isoform of P60660, Isoform Smooth muscle of Myosin light polypeptide 6	53031300	50791000	54666800	52058300	47026300	52439500
P08133	P08133;E5RFF0;E5RI05;E5RIU8;E5RJR0;E5RK69;E7EMC6	ANXA6_HUMAN	ANXA6	Annexin A6	57271300	55408600	43750000	38968900	42114100	46606900
P84243	P68431;P84243;Q16695;Q71DI3;B4DEB1;K7EK07;K7EMV3;K7ES00	H33_HUMAN	H3F3B	Histone H3.3	33247700	27385600	30357600	32510800	54754600	35560500
P07195	P07195;A8MW50;C9J7H8;F5H793;A0A3B3IS95	LDHB_HUMAN	LDHB	L-lactate dehydrogenase B chain	48501700	52806700	44802100	41725500	44127300	45703000
P07900;P07900-2	P07900;P07900-2	HS90A-2_HUMAN;HS90A_HUMAN	HSP90AA1	Heat shock protein HSP 90-alpha	48241100	44751800	44294200	47890300	43122500	44144700
P62826	P62826;B5MDF5;F5H018;H0YFC6;J3KQE5	RAN_HUMAN	RAN	GTP-binding nuclear protein Ran	40631000	42222800	46253900	43662400	47047900	44177800
P35579	P35579;B1AH99;Q5BKV1	MYH9_HUMAN	MYH9	Myosin-9	40558800	47352000	52704700	41761800	36046800	38845800
O15511	O15511;B1ALC0;O15511-2	ARPC5_HUMAN	ARPC5	Actin-related protein 2/3 complex subunit 5	45791100	42214800	41133000	41763100	37472700	41502500
P62258	P62258;K7EM20;P62258-2	1433E_HUMAN	YWHAE	14-3-3 protein epsilon	42945100	44775100	41571900	43595600	52954800	39547600
Q00839	Q00839;A0A1W2PP34;A0A1W2PP35;A0A1W2PPH7;A0A1W2PPL4;A0A1W2PPS1;A0A1W2PQ74;A0A1W2PQD4;A0A1W2PQL0;A0A1W2PRZ7;A0A1X7SBS1;Q00839-2;Q5RI18	HNRPU_HUMAN	HNRNPU	Heterogeneous nuclear ribonucleoprotein U	42726900	43560000	36580900	45144100	45369000	44677500
P06748	P06748;E5RI98;P06748-2;P06748-3	NPM_HUMAN	NPM1	Nucleophosmin	42268100	42014900	38425700	47041100	46972100	42047600
O00299	O00299	CLIC1_HUMAN	CLIC1	Chloride intracellular channel protein 1	38647000	34848700	39717200	38832800	41674000	41188500
P29692;P29692-2	P29692;A0A087X1X7;E9PK01;E9PQZ1;E9PRY8;H0YE58;H0YE72;P29692-2;P29692-3;P29692-4	EF1D-2_HUMAN;EF1D_HUMAN	EEF1D	Elongation factor 1-delta	37680500	39607100	37275400	44056600	40819300	37146500
P63220	P63220;Q8WVC2;Q9BYK1	RS21_HUMAN	RPS21	40S ribosomal protein S21	38160500	39683000	35304800	41108300	37575100	36285600
Q06323	Q06323;H0YKK6;H0YLU2;Q06323-2;Q06323-3	PSME1_HUMAN	PSME1	Proteasome activator complex subunit 1	39697800	40878000	37055700	33168700	35230500	38584300
O15145	O15145	ARPC3_HUMAN	ARPC3	Actin-related protein 2/3 complex subunit 3	36923500	35749600	37423400	31602200	31059000	33399200
P49773	P49773;D6RC06;D6RD60;D6RE99;D6REP8	HINT1_HUMAN	HINT1	Histidine triad nucleotide-binding protein 1	31156600	34129700	34555200	41817400	35375800	34793000
P06744	P06744;A0A0A0MTS2;A0A0J9YX90;A0A0J9YXP8;A0A0J9YYH3;A0A2R8Y6C7;A0A2U3TZU2;K7ENA0;K7EPY4;K7EQ48;P06744-2	G6PI_HUMAN	GPI	Glucose-6-phosphate isomerase	30675200	25942000	26256700	31019600	48603800	31569800
P59998;P59998-3	P59998;F8WCF6;F8WDD7;H7C0A3;P59998-2;P59998-3;A0A0A6YYG9	ARPC4-3_HUMAN;ARPC4_HUMAN	ARPC4	Actin-related protein 2/3 complex subunit 4	35388800	32320900	35771400	28917700	28839300	32245600
Q99497	Q99497;K7ELW0	PARK7_HUMAN	PARK7	Protein/nucleic acid deglycase DJ-1	32805700	32058900	31672700	35689000	33854700	33457100
P06454;P06454-2	P06454;B8ZZA1;B8ZZQ6;B8ZZW7;H7C2N1;P06454-2	PTMA-2_HUMAN;PTMA_HUMAN	PTMA	Prothymosin alpha	32634700	39846600	34212500	37666800	47102100	39131600
P06703	P06703;R4GN98	S10A6_HUMAN	S100A6	Protein S100-A6	22938100	18502200	20472500	18242600	14828700	16458800
Q01518	Q01518;Q01518-2	CAP1_HUMAN	CAP1	Adenylyl cyclase-associated protein 1	34972100	32302800	34353600	28858000	28709600	33003500
Q8TAT6;Q8TAT6-2	Q8TAT6;Q8TAT6-2	NPL4-2_HUMAN;NPL4_HUMAN	NPLOC4	Nuclear protein localization protein 4 homolog	29311600	32775500	33671700	35119600	31880600	33181500
P02768	P02768;A0A0C4DGB6;H0YA55;H7C013	ALBU_HUMAN	ALB	Serum albumin	24387100	26281200	6950910	16597500	8705540	15571200
P06753-2	A0A087WWU8;J3KN67;P06753-2;P06753-5;P06753-7;Q5HYB6	TPM3-2_HUMAN	TPM3	Isoform of P06753, Isoform 2 of Tropomyosin alpha-3 chain	31878900	33599900	35555100	36621600	35692900	32260600
P05387	P05387	RLA2_HUMAN	RPLP2	60S acidic ribosomal protein P2	33453200	34661300	34308100	36305800	37082700	33704400
P13639	P13639	EF2_HUMAN	EEF2	Elongation factor 2	33287100	30942900	32687000	33884600	30590700	30662600
P18669	P18669	PGAM1_HUMAN	PGAM1	Phosphoglycerate mutase 1	29878500	28903900	25314000	33542000	36173400	34740700
P12544;P12544-2	P12544;P12544-2	GRAA-2_HUMAN;GRAA_HUMAN	GZMA	Granzyme A	29712400	26130900	31441300	28696400	27525100	27962000
P31949	P31949	S10AB_HUMAN	S100A11	Protein S100-A11	30698200	29644900	33488700	28377200	30755600	32324600
P31948;P31948-2	P31948;P31948-2;P31948-3	STIP1-2_HUMAN;STIP1_HUMAN	STIP1	Stress-induced-phosphoprotein 1	35507300	32087200	27704900	32640300	32278500	31495600
P31946;P31946-2	P31946;P31946-2	1433B-2_HUMAN;1433B_HUMAN	YWHAB	14-3-3 protein beta/alpha	32955500	36208700	36322100	31326500	31440700	35576400
P09651;P09651-2	A0A2R8Y4L2;P09651;F8VTQ5;F8VZ49;F8W6I7;H0YH80;P09651-2;P09651-3	ROA1-2_HUMAN;ROA1_HUMAN	HNRNPA1	Heterogeneous nuclear ribonucleoprotein A1	31802000	32288500	29661800	35199800	31760800	33551500
O14950;P19105	O14950;P19105;J3QRS3	ML12A_HUMAN;ML12B_HUMAN	MYL12A;MYL12B	Myosin regulatory light chain 12B	32917200	32897500	35012800	29607400	29119200	30699800
P23284	P23284	PPIB_HUMAN	PPIB	Peptidyl-prolyl cis-trans isomerase B	34860000	26284500	27307900	29597600	21772100	27215000
P24534	P24534;C9JZW3	EF1B_HUMAN	EEF1B2	Elongation factor 1-beta	31232200	28644700	28530900	35579500	33894200	32059000
P20700	P20700	LMNB1_HUMAN	LMNB1	Lamin-B1	34563900	29662200	31306800	26874300	29755100	30062400
P52565	P52565;J3KRE2;J3KRY1;J3KS60;J3KTF8;J3QQX2;P52565-2	GDIR1_HUMAN	ARHGDIA	Rho GDP-dissociation inhibitor 1	30678000	29485100	32288600	29547400	26901400	28624800
Q15365	Q15365	PCBP1_HUMAN	PCBP1	Poly(rC)-binding protein 1	32172800	31729200	27813000	29932900	27818400	30743500
Q9UL46	Q9UL46;A0A087X1Z3;H0YM70	PSME2_HUMAN	PSME2	Proteasome activator complex subunit 2	29034200	31596900	27782400	26603200	28478000	27649700
P30101	P30101	PDIA3_HUMAN	PDIA3	Protein disulfide-isomerase A3	29829700	27093500	24302800	28041400	29737900	30532900
P15531;P15531-2	P15531;E7ERL0;J3KPD9;P15531-2;P22392-2;Q32Q12	NDKA-2_HUMAN;NDKA_HUMAN	NME1	Nucleoside diphosphate kinase A	31828100	28140100	24915400	30512900	32169400	27448400
Q9GZL7	Q9GZL7	WDR12_HUMAN	WDR12	Ribosome biogenesis protein WDR12	29960600	30457300	28043300	30298300	26384800	30726700
Q01082	Q01082;A0A087WUZ3;Q01082-2;Q01082-3	SPTB2_HUMAN	SPTBN1	Spectrin beta chain, non-erythrocytic 1	30098100	31987400	28253200	25509900	29049400	27636100
P40926	P40926;G3XAL0;P40926-2	MDHM_HUMAN	MDH2	Malate dehydrogenase, mitochondrial	27380400	25022600	24425400	27716500	28595000	33555700
P16949	P16949;A2A2D0;P16949-2	STMN1_HUMAN	STMN1	Stathmin	30723800	32996800	24992900	27315500	41224700	24168500
P33241	P33241;P33241-2;P33241-3	LSP1_HUMAN	LSP1	Lymphocyte-specific protein 1	25772900	27278200	26938900	28378300	35888300	27648500
Q01130	Q01130;J3KP15	SRSF2_HUMAN	SRSF2	Serine/arginine-rich splicing factor 2	31167700	29641000	27537800	28107600	29767800	30056000
P37837	P37837	TALDO_HUMAN	TALDO1	Transaldolase	28700300	28823500	26542300	23378300	24049300	29249200
P62979	A0A2R8Y422;P62979	RS27A_HUMAN	RPS27A	Ubiquitin-40S ribosomal protein S27a	26640500	28039300	26967700	29460000	32332800	30055700
O75083	O75083;O75083-3	WDR1_HUMAN	WDR1	WD repeat-containing protein 1	20548700	28975100	27854400	27136500	24809500	29176600
O60234	O60234;P60983;G3V4P8;M0QYG8;M0QYJ8;M0R0C1;M0R1D2	GMFG_HUMAN	GMFG	Glia maturation factor gamma	30303000	27294400	26337600	26265200	25888300	26566700
P62854	P62854;Q5JNZ5	RS26_HUMAN	RPS26	40S ribosomal protein S26	26365700	25864600	21950200	29818100	31192800	26537600
P78417	P78417;P78417-3;Q5TA02	GSTO1_HUMAN	GSTO1	Glutathione S-transferase omega-1	28762700	25938600	13057600	25534600	26586100	27986900
P61978-3	P61978;P61978-2;P61978-3;Q5T6W2	HNRPK-3_HUMAN	HNRNPK	Isoform of P61978, Isoform 3 of Heterogeneous nuclear ribonucleoprotein K	24954800	25672900	25427000	25068500	25358700	25631200
P15153	J3KSC4;J3QLK0;P15153;P60763;P63000;B1AH77;B1AH78;B1AH80;P63000-2	RAC2_HUMAN	RAC2	Ras-related C3 botulinum toxin substrate 2	24302700	23690500	28614100	27189500	26279100	28930200
P19338	P19338;H7BY16	NUCL_HUMAN	NCL	Nucleolin	28060200	26551400	21899500	23489700	24315300	24789700
Q9Y3Z3	Q9Y3Z3;A0A2R8YCS7;Q9Y3Z3-3;Q9Y3Z3-4	SAMH1_HUMAN	SAMHD1	Deoxynucleoside triphosphate triphosphohydrolase SAMHD1	26337400	28520800	27789700	18669300	19113400	21661000
P07741	P07741;H3BQZ9	APT_HUMAN	APRT	Adenine phosphoribosyltransferase	25014500	23479700	23115600	20634600	22458700	27708100
P25705	P25705;K7EJP1;K7EK77;K7ENJ4;K7ERX7;P25705-2	ATPA_HUMAN	ATP5F1A	ATP synthase subunit alpha, mitochondrial	18311900	18956000	24146200	23570900	25617700	23668300
P20674	P20674;H3BNX8;H3BRI0	COX5A_HUMAN	COX5A	Cytochrome c oxidase subunit 5A, mitochondrial	23337600	22865300	21163200	26538500	28199400	28955600
P52597	P52597	HNRPF_HUMAN	HNRNPF	Heterogeneous nuclear ribonucleoprotein F	26061800	26446300	23741200	25283500	22839200	25250400
P05386	P05386	RLA1_HUMAN	RPLP1	60S acidic ribosomal protein P1	25727800	25559200	28049800	26848300	25426800	25882500
P17931	P17931;G3V3R6	LEG3_HUMAN	LGALS3	Galectin-3	18743200	12459900	39000100	26573300	20532800	12057600
P14317	P14317;E7EVW7;P14317-2	HCLS1_HUMAN	HCLS1	Hematopoietic lineage cell-specific protein	25459700	24627200	25526200	24750400	23369000	23951200
P25398	P25398	RS12_HUMAN	RPS12	40S ribosomal protein S12	23596300	22708100	21796500	25688000	24293900	24247000
O94826	O94826	TOM70_HUMAN	TOMM70	Mitochondrial import receptor subunit TOM70	15894500	18702200	24287100	23734200	25350900	22496100
O14773	O14773;A0A2R8Y7U1;A0A2R8YD45;A0A2R8YE64;E7EV34	TPP1_HUMAN	TPP1	Tripeptidyl-peptidase 1	20161000	23363200	26557600	23362000	21485500	24535000
Q07955	Q07955;J3KSR8;J3KTL2;Q07955-2;Q07955-3	SRSF1_HUMAN	SRSF1	Serine/arginine-rich splicing factor 1	23480200	23786800	21373400	22254000	23923200	23570100
P54819;P54819-2	P54819;F8VY04;F8W1A4;P54819-2;P54819-5;P54819-6	KAD2-2_HUMAN;KAD2_HUMAN	AK2	Adenylate kinase 2, mitochondrial	20695000	20546000	19625300	21129900	23034400	22139900
P47756-2	P47756;B1AK85;B1AK87;B1AK88;P47756-2	CAPZB-2_HUMAN	CAPZB	Isoform of P47756, Isoform 2 of F-actin-capping protein subunit beta	23075900	23341800	23542200	22104300	21378800	22367600
P39687	P39687;H0YN26	AN32A_HUMAN	ANP32A	Acidic leucine-rich nuclear phosphoprotein 32 family member A	22815300	22683200	21194000	21753700	26052300	24581900
Q9UFW8	Q9UFW8;C9JUJ0	CGBP1_HUMAN	CGGBP1	CGG triplet repeat-binding protein 1	19152400	20256900	23532800	20777100	25463300	24023900
P28065	P28065;A0A0G2JHI2;A0A0G2JJ13;A0A0G2JJA7;A0A0G2JJQ0;A2ACR0;A2ACR1;P28065-2	PSB9_HUMAN	PSMB9	Proteasome subunit beta type-9	22019500	23066400	19825300	21771700	22124700	22471500
P27797	P27797;K7EJB9	CALR_HUMAN	CALR	Calreticulin	22594900	21973400	19869100	26186900	26007800	25739700
P27635	P27635;Q96L21;A0A087WV22;F8W7C6;H7C123;H7C2C5;X1WI28	RL10_HUMAN	RPL10	60S ribosomal protein L10	22249700	22596700	18113800	25445900	25370100	22528700
P29401	P29401;E9PFF2	TKT_HUMAN	TKT	Transketolase	22250100	19390100	20455000	17680800	20625100	20649300
Q01415;Q01415-2	Q01415;B7ZAX5;Q01415-2	GALK2-2_HUMAN;GALK2_HUMAN	GALK2	N-acetylgalactosamine kinase	23980900	19940400	20593500	19146700	18852400	23358800
P52907	P47755;P52907	CAZA1_HUMAN	CAPZA1	F-actin-capping protein subunit alpha-1	22974700	22384200	23249600	22129800	20831000	22101500
Q15819	Q15819;G3V113;H0YBP9;H0YBX6	UB2V2_HUMAN	UBE2V2	Ubiquitin-conjugating enzyme E2 variant 2	22884300	21396100	19926000	20000400	20546700	23404800
Q02878	Q02878;F8VR69;F8VZ45;U3KQR5	RL6_HUMAN	RPL6	60S ribosomal protein L6	25231900	22303300	15521800	22886700	22689600	23706500
P61956;P61956-2	P55854;P61956;Q6EEV6;A8MU27;A8MUA9;P55854-2;P61956-2	SUMO2-2_HUMAN;SUMO2_HUMAN	SUMO2	Small ubiquitin-related modifier 2	21244800	21495900	21826100	23021400	23589000	20436600
Q14103;Q14103-3	Q14103;H0Y8G5;H0YA96;Q14103-2;Q14103-3;Q14103-4	HNRPD-3_HUMAN;HNRPD_HUMAN	HNRNPD	Heterogeneous nuclear ribonucleoprotein D0	16956200	18397300	21142000	20222800	24070400	21038700
P21333;P21333-2	P21333;A0A087WWY3;P21333-2;Q60FE5	FLNA-2_HUMAN;FLNA_HUMAN	FLNA	Filamin-A	19734900	19685100	29789200	19130800	14224300	15962300
P30041	P30041	PRDX6_HUMAN	PRDX6	Peroxiredoxin-6	19696900	22949000	19127600	15518700	22612000	18390300
P61158	P61158;B4DXW1	ARP3_HUMAN	ACTR3	Actin-related protein 3	21033300	20087500	21552500	19379600	18884700	20724200
Q16629;Q16629-2;Q16629-3;Q16629-4	Q16629;A0A0B4J1Z1;C9JAB2;Q16629-2;Q16629-3;Q16629-4	SRSF7-2_HUMAN;SRSF7-3_HUMAN;SRSF7-4_HUMAN;SRSF7_HUMAN	SRSF7	Serine/arginine-rich splicing factor 7	21351600	20955400	20216000	22567400	23722300	22083600
P07858	P07858;R4GMQ5	CATB_HUMAN	CTSB	Cathepsin B	20912600	24082700	22079300	23730600	16109000	19844900
P30085	P30085;P30085-3;Q5T0D2	KCY_HUMAN	CMPK1	UMP-CMP kinase	19586100	19940100	20330600	21162100	21522800	22189600
P10809	P10809;C9JCQ4;C9JL19;C9JL25;E7ESH4;E7EXB4;P10809-2	CH60_HUMAN	HSPD1	60 kDa heat shock protein, mitochondrial	20532800	19046400	16807600	24422100	21780800	22642400
P30086	P30086	PEBP1_HUMAN	PEBP1	Phosphatidylethanolamine-binding protein 1	19291500	21100400	18977100	18100300	17700900	21061600
O43707	O43707;F5GXS2;H7C144;O43707-2;O43707-3	ACTN4_HUMAN	ACTN4	Alpha-actinin-4	22059400	20099500	23485500	20017100	17578300	19918400
O15144	O15144	ARPC2_HUMAN	ARPC2	Actin-related protein 2/3 complex subunit 2	19748400	19079500	22589200	19568300	19615600	19720400
P09211	P09211	GSTP1_HUMAN	GSTP1	Glutathione S-transferase P	21044600	23296000	18932900	16382600	27494400	15963800
P32119	P32119	PRDX2_HUMAN	PRDX2	Peroxiredoxin-2	20818400	19380400	17709600	17524100	18895100	21466200
P50990	P50990;H7C4C8;P50990-2;P50990-3	TCPQ_HUMAN	CCT8	T-complex protein 1 subunit theta	20167300	19811200	18133500	20737700	20887900	20239000
P14625	P14625;A0A1W2PRR1;Q96GW1	ENPL_HUMAN	HSP90B1	Endoplasmin	20467500	18419700	16512500	22641000	23058600	20339000
P07339	P07339;A0A1B0GV23;A0A1B0GVD5;A0A1B0GVP3;A0A1B0GW44;A0A1B0GWE8;H7C1V0;H7C469	CATD_HUMAN	CTSD	Cathepsin D	20014900	18013000	25123100	20595800	15619800	22568000
Q8IWB7	Q8IWB7;C9JJ54;A0A494C0A6	WDFY1_HUMAN	WDFY1	WD repeat and FYVE domain-containing protein 1	19116000	21324400	18380900	18127100	19805300	19528900
P08865	P08865;A0A0C4DG17;C9J9K3	RSSA_HUMAN	RPSA	40S ribosomal protein SA	18666900	19378200	18476400	20072900	19497500	20092000
P25786;P25786-2	P25786;F5GX11;P25786-2	PSA1-2_HUMAN;PSA1_HUMAN	PSMA1	Proteasome subunit alpha type-1	18754200	18036300	17537300	17020800	18530100	17982900
P30048;P30048-2	P30048;P30048-2	PRDX3-2_HUMAN;PRDX3_HUMAN	PRDX3	Thioredoxin-dependent peroxide reductase, mitochondrial	17532700	17371700	18184800	19084700	20572500	21295000
P0DMV8;P0DMV9	P0DMV8;P0DMV9;P34931;A0A0G2JIW1;P0DMV8-2;Q53FA3;V9GZ37	HS71A_HUMAN;HS71B_HUMAN	HSPA1A;HSPA1B	Heat shock 70 kDa protein 1A	18411800	16439200	21161400	18216100	17090800	19596600
Q15185;Q15185-4	Q15185;A0A087WYT3;Q15185-2;Q15185-3;Q15185-4	TEBP-4_HUMAN;TEBP_HUMAN	PTGES3	Prostaglandin E synthase 3	19461500	20248000	18672600	23735400	21083300	21613800
Q14847	Q14847;C9J9W2;Q14847-2;Q14847-3	LASP1_HUMAN	LASP1	LIM and SH3 domain protein 1	17308700	18227000	18057000	17875300	18817600	18954900
P60842	P60842;J3KS25;J3KSZ0;J3KT12;J3KTB5;J3QKZ9;J3QL43;J3QLN6;J3QR64;J3QS69;P60842-2	IF4A1_HUMAN	EIF4A1	Eukaryotic initiation factor 4A-I	19690700	18998600	19333900	22234500	16264000	20149200
P50395	P50395;Q5SX86;Q5SX87;Q5SX90;V9GYF8;V9GYJ7	GDIB_HUMAN	GDI2	Rab GDP dissociation inhibitor beta	19199100	19180500	19311000	17500400	19073300	16244900
Q9UQ80	Q9UQ80;F8VR77;F8W0A3;Q9UQ80-2	PA2G4_HUMAN	PA2G4	Proliferation-associated protein 2G4	19124000	17112600	17329000	19208900	19053100	17954500
P15311	P15311;E7EQR4	EZRI_HUMAN	EZR	Ezrin	16188500	17441800	20058700	17193000	16185200	14560100
P04083	P04083;Q5T3N1	ANXA1_HUMAN	ANXA1	Annexin A1	15236300	16162900	22548200	14659400	14943400	17810800
P36578	P36578;H3BM89;H3BTP7	RL4_HUMAN	RPL4	60S ribosomal protein L4	20087900	18784400	14109900	19494600	20518500	19626500
Q96AE4-2	Q96AE4;C9JSZ1;E9PEB5;Q96AE4-2	FUBP1-2_HUMAN	FUBP1	Isoform of Q96AE4, Isoform 2 of Far upstream element-binding protein 1	19024100	19163100	16647200	17717500	16987900	19318500
O75531	O75531	BAF_HUMAN	BANF1	Barrier-to-autointegration factor	21980000	20304600	17032000	17186500	18928000	20790000
Q92930	P61006;Q92930;H0YL94;H0YLJ8;H0YMN7;H0YNE9;P61006-2	RAB8B_HUMAN	RAB8B	Ras-related protein Rab-8B	15875500	15450300	19200200	18825300	19172900	18505900
Q9H4A3;Q9H4A3-2;Q9H4A3-5;Q9H4A3-6;Q9H4A3-7	Q9H4A3;F5GWT4;Q9H4A3-2;Q9H4A3-4;Q9H4A3-5;Q9H4A3-6;Q9H4A3-7	WNK1-2_HUMAN;WNK1-5_HUMAN;WNK1-6_HUMAN;WNK1-7_HUMAN;WNK1_HUMAN	WNK1	Serine/threonine-protein kinase WNK1	15597500	17214800	19872800	18991200	20501000	16860900
P05976;P05976-2;P08590	P05976;P08590;P05976-2	MYL1-2_HUMAN;MYL1_HUMAN;MYL3_HUMAN	MYL1;MYL3	Myosin light chain 1/3, skeletal muscle isoform	16968000	19473600	19522200	19696100	17761700	17194400
P53999	P53999;D6R970;D6RC37	TCP4_HUMAN	SUB1	Activated RNA polymerase II transcriptional coactivator p15	18400700	18397800	19241800	19533700	15234000	17875200
P42224	P42224;J3KPM9;P42224-2	STAT1_HUMAN	STAT1	Signal transducer and activator of transcription 1-alpha/beta	15749600	22987500	14830100	15191700	14588500	14107400
P31943	P31943;G8JLB6;H0YB39	HNRH1_HUMAN	HNRNPH1	Heterogeneous nuclear ribonucleoprotein H	16943200	17977700	17477700	19137500	17883400	18502000
P61224;P61224-3	P61224;P62834;A0A075B6Q0;E7ESV4;F5GWU8;F5GX62;F5GYB5;F5GYH7;F5H004;F5H077;F5H0B7;F5H491;F5H4H0;F5H500;F5H6R7;F5H7Y6;P61224-2;P61224-3	RAP1B-3_HUMAN;RAP1B_HUMAN	RAP1B	Ras-related protein Rap-1b	16550200	15639600	20974700	22456400	17127200	19213400
Q04760	Q04760;Q04760-2	LGUL_HUMAN	GLO1	Lactoylglutathione lyase	15469500	16124200	14564500	23460200	21533500	14893300
P61353	P61353;K7ELC7	RL27_HUMAN	RPL27	60S ribosomal protein L27	18282500	17671100	13924500	18200100	19879500	17366800
P11021	P11021	BIP_HUMAN	HSPA5	Endoplasmic reticulum chaperone BiP	17288800	15232000	16010100	19180100	17531200	17961900
Q13247;Q13247-3	Q08170;Q13247;A0A0D9SEM4;A0A0D9SGD2;Q13247-2;Q13247-3	SRSF6-3_HUMAN;SRSF6_HUMAN	SRSF6	Serine/arginine-rich splicing factor 6	18418600	18431900	16262900	18619800	19290000	19747000
P63244	P63244;D6RAC2;D6REE5;D6RF23;H0Y8R5;H0Y8W2;H0Y9P0;H0YAF8;H0YAM7;J3KPE3	RACK1_HUMAN	RACK1	Receptor of activated protein C kinase 1	16855400	17848000	16185300	17680900	15975500	17091600
P07355;P07355-2	A6NMY6;P07355;H0YL33;H0YM50;H0YN28;H0YN42;P07355-2	ANXA2-2_HUMAN;ANXA2_HUMAN	ANXA2	Annexin A2	16871900	13516100	20039500	13803200	13044800	14819000
P09429	P09429;P26583	HMGB1_HUMAN	HMGB1	High mobility group protein B1	16405200	16072900	16705100	14748900	16229300	15167700
Q92688;Q92688-2	Q92688;Q92688-2	AN32B-2_HUMAN;AN32B_HUMAN	ANP32B	Acidic leucine-rich nuclear phosphoprotein 32 family member B	19868200	18499500	17045500	16427200	17945200	17767800
Q96FW1	Q96FW1;F5GYN4;F5H3F0;F5H6Q1;J3KR44;Q96FW1-2	OTUB1_HUMAN	OTUB1	Ubiquitin thioesterase OTUB1	17391300	16998900	18280700	17283900	17223700	18585700
P38646	P38646;A0A3B3ITI4;D6RJI2	GRP75_HUMAN	HSPA9	Stress-70 protein, mitochondrial	17833800	17199800	17266000	19599500	16527400	18075400
P62269	P62269;J3JS69	RS18_HUMAN	RPS18	40S ribosomal protein S18	17399700	17261500	14356700	19682500	20298200	17629400
P53634	P53634	CATC_HUMAN	CTSC	Dipeptidyl peptidase 1	18246500	17445300	23355800	17798000	11474700	15158700
P62851	P62851	RS25_HUMAN	RPS25	40S ribosomal protein S25	17261200	15799100	14350600	18965600	19476200	17997600
P60900	P60900;G3V295;G3V3I1;G3V5Z7;P60900-2;P60900-3	PSA6_HUMAN	PSMA6	Proteasome subunit alpha type-6	18061000	16797500	15722500	15413600	16014800	16697300
P35268	P35268;K7ERI7	RL22_HUMAN	RPL22	60S ribosomal protein L22	12305200	14389900	13979900	16503400	19377100	14680000
P07237	P07237;H7BZ94;I3L312;I3L398;I3L3U6	PDIA1_HUMAN	P4HB	Protein disulfide-isomerase	18584500	15650200	15516600	19395400	19978700	19282900
P61088	P61088;F8VSD4;F8VV71;F8VZ29	UBE2N_HUMAN	UBE2N	Ubiquitin-conjugating enzyme E2 N	17856000	16908100	16921800	15963100	15790400	17871500
Q14764	Q14764	MVP_HUMAN	MVP	Major vault protein	17106400	16843300	20358400	17443600	11935000	16522000
Q9ULZ3	Q9ULZ3;Q9ULZ3-2;Q9ULZ3-3	ASC_HUMAN	PYCARD	Apoptosis-associated speck-like protein containing a CARD	19703400	16508300	16814600	14531500	17329100	18014500
P48735	P48735;P48735-2	IDHP_HUMAN	IDH2	Isocitrate dehydrogenase [NADP], mitochondrial	16736700	14181300	15444900	13118200	18319100	15495600
Q8IYT4;Q8IYT4-2	Q8IYT4;K7EIJ8;K7EM02;K7EPQ6;Q8IYT4-2	KATL2-2_HUMAN;KATL2_HUMAN	KATNAL2	Katanin p60 ATPase-containing subunit A-like 2	17515000	13978500	15217800	14294000	13221000	17234800
P62861	E9PR30;P62861	RS30_HUMAN	FAU	Isoform of P35544, 40S ribosomal protein S30	16142900	14789200	11905400	15879900	17082200	16688300
P84103;P84103-2	P84103;A0A087X2D0;P84103-2	SRSF3-2_HUMAN;SRSF3_HUMAN	SRSF3	Serine/arginine-rich splicing factor 3	16330100	16417600	14845700	15981800	15297900	15622400
P67936	P67936;A0A2R8YE05;K7ENT6;K7EPB9;P67936-2	TPM4_HUMAN	TPM4	Tropomyosin alpha-4 chain	16737200	14304800	17040600	17740000	18017100	16834200
Q13838	O00148;Q13838;A0A0G2JJZ9;A0A140T9X3;H0Y400;Q13838-2;Q5STU3	DX39B_HUMAN	DDX39B	Spliceosome RNA helicase DDX39B	16233400	15890000	15425300	15641900	15425300	16047100
P55072	P55072	TERA_HUMAN	VCP	Transitional endoplasmic reticulum ATPase	15959300	13918600	15498900	15461900	15135400	14893700
P04080	P04080	CYTB_HUMAN	CSTB	Cystatin-B	11464400	15360700	19324100	17776500	16449100	19438700
P10606	P10606	COX5B_HUMAN	COX5B	Cytochrome c oxidase subunit 5B, mitochondrial	15303900	16652900	14674000	18491100	19278300	20573700
Q86UX7;Q86UX7-2	Q86UX7;F5H1C6;Q86UX7-2	URP2-2_HUMAN;URP2_HUMAN	FERMT3	Fermitin family homolog 3	13943200	16293400	19382700	15861700	15321100	13282800
P23246	P23246;P23246-2	SFPQ_HUMAN	SFPQ	Splicing factor, proline- and glutamine-rich	14985900	15103300	15611500	16921500	14253200	16644700
P60903	P60903	S10AA_HUMAN	S100A10	Protein S100-A10	20066200	13982300	17646900	13311900	11514700	15801800
K7EM38	K7EM38	K7EM38_HUMAN	ACTG1	Isoform of P63261, Actin, cytoplasmic 2 (Fragment)	2547600	1841780	125489000	1322050	1098510	3655420
P09972	P09972;A8MVZ9	ALDOC_HUMAN	ALDOC	Fructose-bisphosphate aldolase C	13622700	13412800	9221080	15311900	21296600	17201600
P40925;P40925-3	P40925;C9IZI0;C9JF79;C9JLV6;F8WFC2;P40925-3	MDHC-3_HUMAN;MDHC_HUMAN	MDH1	Malate dehydrogenase, cytoplasmic	13058500	14359400	15008900	12559300	15563000	13876700
P27487	P27487	DPP4_HUMAN	DPP4	Dipeptidyl peptidase 4	17199800	13303300	18285800	15479400	14307000	15681300
Q09666	Q09666	AHNK_HUMAN	AHNAK	Neuroblast differentiation-associated protein AHNAK	16882100	11976600	20423100	14174800	10141700	14481100
P13010	P13010	XRCC5_HUMAN	XRCC5	X-ray repair cross-complementing protein 5	15134900	15540400	14483000	14752800	13889800	16606800
P00441	P00441;H7BYH4	SODC_HUMAN	SOD1	Superoxide dismutase [Cu-Zn]	11523300	12777600	13540600	14372200	13161900	15813000
Q9Y3F4;Q9Y3F4-2	Q9Y3F4;H0YH33;Q9Y3F4-2	STRAP-2_HUMAN;STRAP_HUMAN	STRAP	Serine-threonine kinase receptor-associated protein	15638900	15079800	14195100	16212100	15242200	14853500
P62857	P62857	RS28_HUMAN	RPS28	40S ribosomal protein S28	14370500	13211400	11871700	14263100	12458800	12624400
P02765	P02765;C9JV77	FETUA_HUMAN	AHSG	Alpha-2-HS-glycoprotein	13948800	15579800	3399560	5013230	2604530	5120250
P21796	P21796;C9JI87	VDAC1_HUMAN	VDAC1	Voltage-dependent anion-selective channel protein 1	13480900	12407300	11756500	14916100	15107300	14997000
P16401	P10412;P16401;P16402;P16403;Q02539	H15_HUMAN	HIST1H1B	Histone H1.5	8909950	5954200	4807800	6677620	22890200	6162590
P61586	P08134;P61586;P62745;U3KQA9;U3KQV3;C9JNR4;C9JRM1;C9JX21;E9PLA2;E9PN11;E9PQH6;Q5JR05;Q5JR06;Q5JR07;Q5JR08	RHOA_HUMAN	RHOA	Transforming protein RhoA	14284600	13197100	16724100	16064600	14895100	16338600
P60866;P60866-2	P60866;E5RJX2;P60866-2	RS20-2_HUMAN;RS20_HUMAN	RPS20	40S ribosomal protein S20	10762100	11588900	13968300	15357900	17849900	14381300
P39023	P39023;B5MCW2;G5E9G0;H7C3M2;H7C422	RL3_HUMAN	RPL3	60S ribosomal protein L3	15153100	14838600	11288600	15948700	15796000	14934700
Q15084;Q15084-2;Q15084-3;Q15084-4;Q15084-5	Q15084;Q15084-2;Q15084-3;Q15084-4;Q15084-5	PDIA6-2_HUMAN;PDIA6-3_HUMAN;PDIA6-4_HUMAN;PDIA6-5_HUMAN;PDIA6_HUMAN	PDIA6	Protein disulfide-isomerase A6	14904300	13446200	11866100	17123900	16377200	16839300
Q01105-2	P0DME0;Q01105;A0A087X027;A0A0C4DFV9;Q01105-2;Q01105-3;Q01105-4	SET-2_HUMAN	SET	Isoform of Q01105, Isoform 2 of Protein SET	14118700	15498400	13731800	15708800	16929100	15575800
P46060	P46060	RAGP1_HUMAN	RANGAP1	Ran GTPase-activating protein 1	17015100	16085500	15189700	16564900	12395700	16322400
P62888	P62888;A0A0B4J213;A0A0C4DH44;E5RI99	RL30_HUMAN	RPL30	60S ribosomal protein L30	11887000	12387400	13303500	14810800	16615200	13472800
P62244	P62244;H3BVC7;I3L3P7	RS15A_HUMAN	RPS15A	40S ribosomal protein S15a	12039500	12765900	13783700	17045000	16908200	13375700
P62081	P62081;A0A2R8Y623	RS7_HUMAN	RPS7	40S ribosomal protein S7	14340300	14028100	12447700	15299600	16352900	14442000
P07602	P07602;C9JIZ6;P07602-2;P07602-3;Q5BJH1	SAP_HUMAN	PSAP	Prosaposin	13703300	14452800	20332200	16931600	11313000	17252800
O14745	O14745;O14745-2	NHRF1_HUMAN	SLC9A3R1	Na(+)/H(+) exchange regulatory cofactor NHE-RF1	15081200	15977100	15954100	14189200	13414400	14711100
P61981	P61981	1433G_HUMAN	YWHAG	14-3-3 protein gamma	12150600	13376700	12568000	14562500	15383400	13730400
O15143	O15143;C9J4Z7;C9J6C8;C9JEY1;C9JFG9;C9JQM8;C9K057;F8VXW2;A0A1W2PNV4	ARC1B_HUMAN	ARPC1B	Actin-related protein 2/3 complex subunit 1B	11542400	13224200	15585000	13844600	13952400	13256000
Q99714	Q99714	HCD2_HUMAN	HSD17B10	3-hydroxyacyl-CoA dehydrogenase type-2	13903100	13268500	13967400	13048000	12817400	14981300
P05388	P05388;F8VW21;F8VWS0;F8VZS0;F8W1K8;P05388-2	RLA0_HUMAN	RPLP0	60S acidic ribosomal protein P0	14498400	13469000	14357400	13163600	13756800	13669300
P04908;Q7L7L0;Q93077	P04908;Q7L7L0;Q93077	H2A1B_HUMAN;H2A1C_HUMAN;H2A3_HUMAN	HIST1H2AC;HIST1H2AE;HIST3H2A	Histone H2A type 1-B/E	11163800	8710860	10081700	10319300	14926000	13532200
P43243	P43243;A0A0R4J2E8;A8MXP9;B3KM87;D6R991;D6RBI2;D6RBK5;D6RE02;D6REM6;D6RIA2;H0Y8T4;P43243-2	MATR3_HUMAN	MATR3	Matrin-3	13254100	13938100	14372100	13998300	13177500	13981900
P62241	P62241;Q5JR95	RS8_HUMAN	RPS8	40S ribosomal protein S8	13112800	13031000	10491600	14838200	14236100	14244500
Q13011	Q13011;M0QZW4;M0R248	ECH1_HUMAN	ECH1	Delta(3,5)-Delta(2,4)-dienoyl-CoA isomerase, mitochondrial	10712500	12620300	12849300	13753000	13595100	13981400
P51991	P51991;P51991-2	ROA3_HUMAN	HNRNPA3	Heterogeneous nuclear ribonucleoprotein A3	12469200	13843700	13608500	14259500	14380000	14145800
P46776	P46776;E9PLL6	RL27A_HUMAN	RPL27A	60S ribosomal protein L27a	13581600	13107800	10857600	14601600	15143400	14362900
P25788;P25788-2	P25788;G3V3W4;G3V5N4;P25788-2	PSA3-2_HUMAN;PSA3_HUMAN	PSMA3	Proteasome subunit alpha type-3	14179800	13919400	12937400	13021200	13997800	13304800
P02042;P68871	P02042;P02100;P68871;P69891;P69892;A0A2R8Y7R2;A8MUF7;E9PEW8;E9PFT6;F8W6P5;A0A2R8Y7X9	HBB_HUMAN;HBD_HUMAN	HBB;HBD	Hemoglobin subunit delta	2319430	1731810	6932270	52110300	19478000	40039700
A6NHQ2	A6NHQ2	FBLL1_HUMAN	FBLL1	rRNA/tRNA 2'-O-methyltransferase fibrillarin-like protein 1	13961400	12297500	13006800	15617600	13336500	16841800
P35232	P35232;C9JW96;C9JZ20;E7ESE2;E9PCW0;P35232-2	PHB_HUMAN	PHB	Prohibitin	12661700	12312600	12597200	14465000	13499200	16007200
Q15181	Q15181;Q5SQT6	IPYR_HUMAN	PPA1	Inorganic pyrophosphatase	14528800	15553600	12877700	13494200	15184300	13133500
H7BZJ3	H7BZJ3	H7BZJ3_HUMAN	PDIA3	Isoform of P30101, Protein disulfide-isomerase A3 (Fragment)	12529100	13087500	13201400	14013100	15034400	9162910
P22314;P22314-2	P22314;P22314-2	UBA1-2_HUMAN;UBA1_HUMAN	UBA1	Ubiquitin-like modifier-activating enzyme 1	14471400	11868300	11648000	11675600	14124900	14860700
P12004	P12004	PCNA_HUMAN	PCNA	Proliferating cell nuclear antigen	14035800	15669500	11909000	16912500	8173730	13599000
P84098	P84098;J3KTE4;J3QR09	RL19_HUMAN	RPL19	60S ribosomal protein L19	11994100	12897100	9263480	13514500	13125800	11913300
P62873	P62873;B3KVK2;P62873-2	GBB1_HUMAN	GNB1	Guanine nucleotide-binding protein G(I)/G(S)/G(T) subunit beta-1	13384200	12660200	14677800	12523900	12396600	11917900
P00491	P00491	PNPH_HUMAN	PNP	Purine nucleoside phosphorylase	13983200	13721800	15376500	11324700	12224800	13266100
P35754	P35754	GLRX1_HUMAN	GLRX	Glutaredoxin-1	12373500	11879600	13359400	14289800	13340200	13730000
P62277	P62277	RS13_HUMAN	RPS13	40S ribosomal protein S13	11181600	10775700	9752030	12891800	15563100	12487600
P40121	P40121;B8ZZL6;E7ENU9;P40121-2	CAPG_HUMAN	CAPG	Macrophage-capping protein	13256200	6842790	11382500	11510300	17275100	14601100
P61160	P61160;A0A1B0GWD0;A0A1B0GWH0;P61160-2	ARP2_HUMAN	ACTR2	Actin-related protein 2	13245400	13312800	14758400	12528800	11892200	12227200
P61313	P61313;A0A2R8Y738;A0A2R8YEM3;E7ENU7;E7EQV9;E7EX53;P61313-2	RL15_HUMAN	RPL15	60S ribosomal protein L15	14073600	13718100	11290100	14564200	11778400	12554400
P30626;P30626-2;P30626-3	P30626;C9J0K6;P30626-2;P30626-3	SORCN-2_HUMAN;SORCN-3_HUMAN;SORCN_HUMAN	SRI	Sorcin	12813400	12734700	12201400	13409400	14262500	14599500
P00367	P00367;P49448;P00367-3	DHE3_HUMAN	GLUD1	Glutamate dehydrogenase 1, mitochondrial	12855000	11985900	12130600	12012900	10387700	14010200
Q9H9B4	Q9H9B4;D6RDG7;D6RFI0;S4R2X2	SFXN1_HUMAN	SFXN1	Sideroflexin-1	9748790	10804500	12937200	13891800	13255500	12150300
P13804	P13804;H0YK49;H0YL83;P13804-2	ETFA_HUMAN	ETFA	Electron transfer flavoprotein subunit alpha, mitochondrial	11943000	12282500	11949900	12686500	13056000	13323800
P49321;P49321-3	P49321;E9PPR5;P49321-3;P49321-4	NASP-3_HUMAN;NASP_HUMAN	NASP	Nuclear autoantigenic sperm protein	13711000	14518300	10518800	14652900	16029500	12737500
P26641;P26641-2	P26641;P26641-2	EF1G-2_HUMAN;EF1G_HUMAN	EEF1G	Elongation factor 1-gamma	11615600	12044700	12180800	13134100	11506600	11385900
P30050	P30050	RL12_HUMAN	RPL12	60S ribosomal protein L12	10445000	10977500	12957300	13561200	15019900	12309800
Q9BPX5	Q9BPX5	ARP5L_HUMAN	ARPC5L	Actin-related protein 2/3 complex subunit 5-like protein	12107500	12619900	13344700	13041100	12597000	13007200
Q8N8A2	O15084;Q8N8A2;A0A2R8Y7Y4;B4DIW9;H7C209;H7C4A0;O15084-1;O15084-2;O15084-4;Q8N8A2-2;Q8N8A2-3;Q8N8A2-4;Q8N8A2-5	ANR44_HUMAN	ANKRD44	Serine/threonine-protein phosphatase 6 regulatory ankyrin repeat subunit B	12767800	14309400	12464200	13693800	12880600	13690500
P42765	P42765;A0A0B4J2A4;K7EME0	THIM_HUMAN	ACAA2	3-ketoacyl-CoA thiolase, mitochondrial	11652700	11518600	11292700	11176200	12596300	12621200
P49915	P49915;P49915-2	GUAA_HUMAN	GMPS	GMP synthase [glutamine-hydrolyzing]	13296300	12737800	10986200	12953100	13875400	13302300
P62913;P62913-2	P62913;P62913-2;Q5VVC8	RL11-2_HUMAN;RL11_HUMAN	RPL11	60S ribosomal protein L11	11548400	10820500	13030300	13737800	14129800	12898400
Q9H1R2-2;Q9H1R2-3;Q9H1R2-4	Q9H1R2-2;Q9H1R2-3;Q9H1R2-4	DUS15-2_HUMAN;DUS15-3_HUMAN;DUS15-4_HUMAN	DUSP15	Isoform of Q9H1R2, Isoform 2 of Dual specificity protein phosphatase 15	14395600	11801100	12788900	13327000	9459570	13921600
P14678;P14678-2;P14678-3;P63162;P63162-2	P14678;P63162;J3QLE5;P14678-2;P14678-3;P63162-2	RSMB-2_HUMAN;RSMB-3_HUMAN;RSMB_HUMAN;RSMN-2_HUMAN;RSMN_HUMAN	SNRPB;SNRPN	Small nuclear ribonucleoprotein-associated proteins B and B'	12358100	11348200	12106800	13299000	14158900	12923600
P48643	P48643;B7ZAR1;E7ENZ3;E9PCA1;P48643-2	TCPE_HUMAN	CCT5	T-complex protein 1 subunit epsilon	13587300	12412200	10963000	12865200	13861300	12797600
Q9UJU6-2	B4DDD6;Q9UJU6-2;Q9UJU6-3;Q9UJU6-4;Q9UJU6-6	DBNL-2_HUMAN	DBNL	Isoform of Q9UJU6, Isoform 2 of Drebrin-like protein	12191400	12776400	13491500	13351000	12697500	12874100
P28066	P28066;P28066-2	PSA5_HUMAN	PSMA5	Proteasome subunit alpha type-5	12201700	12672000	12504000	13118400	14077800	12905800
P30049	P30049	ATPD_HUMAN	ATP5F1D	ATP synthase subunit delta, mitochondrial	11540200	11883700	13006800	14397800	14345600	14648000
Q15907	P62491;Q15907;B4DQU5;H3BMH2;H3BSC1;P62491-2;Q15907-2	RB11B_HUMAN	RAB11B	Ras-related protein Rab-11B	12997500	12502600	12210600	12490900	12683100	12141200
P45880	P45880;A0A0A0MR02;P45880-1;P45880-2	VDAC2_HUMAN	VDAC2	Voltage-dependent anion-selective channel protein 2	9086480	11858000	10944400	12741400	12170900	13197500
O75368	O75368	SH3L1_HUMAN	SH3BGRL	SH3 domain-binding glutamic acid-rich-like protein	12293500	13571100	12264700	11592600	12545400	12071000
P0DN76;Q01081	P0DN76;Q01081;Q01081-2;Q01081-4	U2AF1_HUMAN;U2AF5_HUMAN	U2AF1;U2AF1L5	Splicing factor U2AF 35 kDa subunit-like protein	11831700	11785400	12198500	12920100	12840300	13263400
P46781	P46781;A0A024R4M0;A8MXK4;B5MCT8;C9JM19;F2Z3C0	RS9_HUMAN	RPS9	40S ribosomal protein S9	11278600	10883500	7958420	13909500	12965100	10250600
P14314;P14314-2	P14314;K7ELL7;P14314-2	GLU2B-2_HUMAN;GLU2B_HUMAN	PRKCSH	Glucosidase 2 subunit beta	12400700	12378500	11078900	14286200	15302200	13479800
Q9Y2W1	Q9Y2W1;A0A3B3ITZ9	TR150_HUMAN	THRAP3	Thyroid hormone receptor-associated protein 3	12274000	13400200	11879100	12428200	12492100	12661500
O75643	O75643;A0A494C1A5	U520_HUMAN	SNRNP200	U5 small nuclear ribonucleoprotein 200 kDa helicase	11942000	12776400	12616100	12458300	11426100	11471900
P62701	P62701;Q8TD47	RS4X_HUMAN	RPS4X	40S ribosomal protein S4, X isoform	12188900	11297400	10781900	14228700	15017800	13456800
Q8WYJ6	Q8WYJ6;J3KNL2	SEPT1_HUMAN	SEPT1	Septin-1	13154800	12951300	11088300	12044500	13330200	11787300
O14818	O14818;H0Y586;O14818-2	PSA7_HUMAN	PSMA7	Proteasome subunit alpha type-7	11802900	11303600	11074300	10105800	10728200	10579800
P50991	P50991;P50991-2	TCPD_HUMAN	CCT4	T-complex protein 1 subunit delta	12769400	11690400	11096000	11360400	11660000	11421100
Q92945	Q92945;A0A087WTP3;M0QYH3;M0R0I5	FUBP2_HUMAN	KHSRP	Far upstream element-binding protein 2	13074000	13363100	11089400	11818900	12931400	11759500
P04899	P04899;P04899-2;P04899-3;P04899-4;P04899-5;P04899-6	GNAI2_HUMAN	GNAI2	Guanine nucleotide-binding protein G(i) subunit alpha-2	10442200	11706000	14319800	13375200	11987600	12232700
P55769	P55769;A0A3B3IRU2;A0A3B3IUA2;B1AHD1	NH2L1_HUMAN	SNU13	NHP2-like protein 1	11832000	11578400	10779900	11820900	10630400	12692300
Q9BTT0	Q9BTT0;E9PPH5;Q9BTT0-2;Q9BTT0-3	AN32E_HUMAN	ANP32E	Acidic leucine-rich nuclear phosphoprotein 32 family member E	12700500	12417100	11995800	12798800	13432300	14456800
Q14005;Q14005-2;Q14005-3	Q14005;H0YLH9;Q14005-2;Q14005-3;Q14005-4	IL16-2_HUMAN;IL16-3_HUMAN;IL16_HUMAN	IL16	Pro-interleukin-16	12574600	12070300	12181600	9699630	11616300	14103900
P17987	P17987;E7EQR6;E7ERF2	TCPA_HUMAN	TCP1	T-complex protein 1 subunit alpha	11243700	10860200	10976000	11081100	12089900	11286800
P28070	P28070	PSB4_HUMAN	PSMB4	Proteasome subunit beta type-4	12325800	11785000	11060000	10945900	11805300	11833400
P63241;P63241-2	P63241;Q6IS14;Q9GZV4;C9J4W5;C9J7B5;F8WCJ1;I3L397;I3L504;P63241-2	IF5A1-2_HUMAN;IF5A1_HUMAN	EIF5A	Eukaryotic translation initiation factor 5A-1	11889800	11857700	11510700	11876500	13139300	12086900
O75964	O75964;A0A3B3ITX4;E9PN17	ATP5L_HUMAN	ATP5MG	ATP synthase subunit g, mitochondrial	10197600	9464210	11310600	11290000	12576300	11969400
Q9UHD8;Q9UHD8-2;Q9UHD8-5;Q9UHD8-7	Q9UHD8;K7EIE4;K7EK18;K7EL40;K7EQD7;K7ER52;Q9UHD8-2;Q9UHD8-3;Q9UHD8-4;Q9UHD8-5;Q9UHD8-7;Q9UHD8-8;Q9UHD8-9	SEPT9-2_HUMAN;SEPT9-5_HUMAN;SEPT9-7_HUMAN;SEPT9_HUMAN	SEPT9	Septin-9	10906400	10965000	11592700	10741100	12122600	10853300
P28062	P28062;P28062-2;X5D2R7	PSB8_HUMAN	PSMB8	Proteasome subunit beta type-8	11123200	12602400	10955400	10882500	10850500	10877800
Q92882	Q92882	OSTF1_HUMAN	OSTF1	Osteoclast-stimulating factor 1	12171500	9568230	12052800	13375900	10273200	12177800
P49368	P49368;B4DUR8;E9PQ35;E9PRC8;P49368-2;Q5SZW8;Q5SZX6	TCPG_HUMAN	CCT3	T-complex protein 1 subunit gamma	10805000	10031900	10723600	10789700	11513700	10670900
P49411	P49411	EFTU_HUMAN	TUFM	Elongation factor Tu, mitochondrial	11889400	11404100	11568000	11127300	10446100	11712400
P42677	P42677;Q71UM5;C9JLI6;H0YMV8	RS27_HUMAN	RPS27	40S ribosomal protein S27	10958700	11468300	11115200	12703000	12136600	10385400
P40429	P40429;Q6NVV1;M0QYS1;Q8J015	RL13A_HUMAN	RPL13A	60S ribosomal protein L13a	12360200	11701700	9168750	13098300	12262200	11153800
Q96FJ2	P63167;Q96FJ2	DYL2_HUMAN	DYNLL2	Dynein light chain 2, cytoplasmic	11327600	12530600	12434500	11845500	10544400	12252300
Q14141;Q14141-2;Q14141-4	Q14141;Q92599;Q9NVA2;A0A087X142;A6NFQ9;A6NMH6;B1AMS2;D6RDU5;D6RER5;D6RGI3;F8W8I8;H0Y961;Q14141-2;Q14141-4;Q92599-2;Q92599-3;Q92599-4;Q9NVA2-2	SEPT6-2_HUMAN;SEPT6-4_HUMAN;SEPT6_HUMAN	SEPT6	Septin-6	12532400	12171600	10765300	10535600	12872300	12041200
O15533;O15533-3	O15533;A0A0A0MSV9;A0A0G2JH37;A0A0G2JKZ1;A2AB90;C9JA35;O15533-2;O15533-3;Q6P1N7	TPSN-3_HUMAN;TPSN_HUMAN	TAPBP	Tapasin	6739060	10315800	8378030	10253700	13058300	10688300
P04439	P01891;A0A0G2JI36;A0A0G2JIF2;A0A0G2JL56;A0A0G2JPD3;A0A140T8W8;A0A140T8Y4;A0A140T913;A0A140T933;A0A140T941;A0A140T951;A0A140T955;A0A140T975;A0A140T9A9;A0A140T9G0;A0A140T9H3;A0A140T9I0;A0A140T9S9;A0A140T9X5;A0A140T9Z6;A0A1W2PP29;A0A1W2PPF8;A0A1W2PPQ2;A0A1W2PPR8;A0A1W2PQD0;A0A1W2PQE2;A0A1W2PQS8;A0A1W2PQZ3;A0A1W2PR61;A0A1W2PRT9;A0A1W2PS24;A0A1W2PS39;A0A1W2PSE7;B0UXQ0;P01889;P01892;P03989;P04439;P0553…	1A03_HUMAN	HLA-A	Isoform of P01891, HLA class I histocompatibility antigen, A-3 alpha chain	9132930	10770200	8613830	14879400	13722500	11039500
Q00610;Q00610-2	P53675;Q00610;A0A087WVQ6;A0A087WX41;P53675-2;Q00610-2	CLH1-2_HUMAN;CLH1_HUMAN	CLTC	Clathrin heavy chain 1	12198600	12040100	12812700	12497500	11509400	10519300
P62310	P62310	LSM3_HUMAN	LSM3	U6 snRNA-associated Sm-like protein LSm3	12253300	11449700	10958000	10728700	12608700	14044900
P26599;P26599-2;P26599-3	P26599;A0A0D9SF20;A0A0U1RRM4;A6NLN1;P26599-2;P26599-3	PTBP1-2_HUMAN;PTBP1-3_HUMAN;PTBP1_HUMAN	PTBP1	Polypyrimidine tract-binding protein 1	11555800	11258200	11460000	11820100	11479200	11764500
P27348	P27348;E9PG15	1433T_HUMAN	YWHAQ	14-3-3 protein theta	11037300	11710100	11846000	12041800	11050500	10849300
Q9Y490	Q9Y490	TLN1_HUMAN	TLN1	Talin-1	10722700	10731800	13473400	10773700	11782700	10458000
Q16851	Q16851;A0A087WYS1;C9JNZ1;E7EUC7;Q16851-2	UGPA_HUMAN	UGP2	UTP--glucose-1-phosphate uridylyltransferase	12233200	11412400	10767900	10169700	9934850	10312300
P19367;P19367-2;P19367-3;P19367-4	P19367;P19367-2;P19367-3;P19367-4	HXK1-2_HUMAN;HXK1-3_HUMAN;HXK1-4_HUMAN;HXK1_HUMAN	HK1	Hexokinase-1	9240160	9914280	13028200	10749900	11519200	10355900
P62899	P62899;B7Z4C8;B7Z4E3;B8ZZK4;C9JU56;H7C2W9;P62899-2;P62899-3	RL31_HUMAN	RPL31	60S ribosomal protein L31	10434000	10715700	8908930	11383700	12520100	10322300
P61247	P61247;D6RAS7;D6RAT0;D6RB09;D6RED7;D6RG13;E9PFI5;H0Y8L7	RS3A_HUMAN	RPS3A	40S ribosomal protein S3a	10295900	10075600	9206010	12151400	13711400	10814500
P04632	P04632;A0A0C4DGQ5;K7EKD8;K7ELJ7;K7EMQ1	CPNS1_HUMAN	CAPNS1	Calpain small subunit 1	11571300	11494200	13622100	11748900	11102800	12486900
P26373	P26373;H3BUK8;J3KS98;P26373-2	RL13_HUMAN	RPL13	60S ribosomal protein L13	11509200	11145700	8786000	11828200	12389800	12199600
O43719	O43719	HTSF1_HUMAN	HTATSF1	HIV Tat-specific factor 1	10943400	11752900	11787900	12069700	14043200	11682500
P61769	P61769;F5H6I0;H0YLF3	B2MG_HUMAN	B2M	Beta-2-microglobulin	12091300	11129200	9451300	13770800	10276100	11476600
P05141	P05141;P12235;P12236;Q9H0C2;V9GYG0	ADT2_HUMAN	SLC25A5	ADP/ATP translocase 2	8803500	11579800	14592700	11742100	11951200	8402240
Q00653;Q00653-4	Q00653;Q00653-3;Q00653-4	NFKB2-4_HUMAN;NFKB2_HUMAN	NFKB2	Nuclear factor NF-kappa-B p100 subunit	7673630	9330090	10760100	11957100	11620900	11256000
P30046	A6NHG4;P30046;B5MC82;J3KQ18;P30046-2	DOPD_HUMAN	DDT	D-dopachrome decarboxylase	11263600	10164400	10405900	11280200	13732200	12500000
Q92841	Q92841;A0A1W2PQ51;A0A1X7SBZ2;Q92841-1;Q92841-2;Q92841-3	DDX17_HUMAN	DDX17	Probable ATP-dependent RNA helicase DDX17	9665110	9777740	10800300	10743700	11608400	10848900
P30044;P30044-2	P30044;P30044-2;P30044-3	PRDX5-2_HUMAN;PRDX5_HUMAN	PRDX5	Peroxiredoxin-5, mitochondrial	9973800	10353000	9197690	10765500	10782500	14217800
Q9Y3U8	Q9Y3U8;J3KTD3;J3QSB5	RL36_HUMAN	RPL36	60S ribosomal protein L36	11413900	10762500	8719680	11259900	12049000	10864100
P69905	P69905;A0A2R8Y7C0	HBA_HUMAN	HBA2	Hemoglobin subunit alpha	1795900	1548300	5363940	31428400	9700740	36995000
O95571	O95571;M0QXB5	ETHE1_HUMAN	ETHE1	Persulfide dioxygenase ETHE1, mitochondrial	10009500	9944410	10408800	11416800	10574700	13130000
P31930	P31930	QCR1_HUMAN	UQCRC1	Cytochrome b-c1 complex subunit 1, mitochondrial	9954000	9986150	10508100	12331800	11671200	12742000
Q99439	Q99439;A0A087X271;B4DDF4;B4DUT8;H3BVI6;K7ES69;Q99439-2	CNN2_HUMAN	CNN2	Calponin-2	12270300	14414200	11256200	10397600	8156020	9529810
P62942	P62942;A0A087WZM5;Q5W0X3	FKB1A_HUMAN	FKBP1A	Peptidyl-prolyl cis-trans isomerase FKBP1A	9016500	12118900	10100200	11115600	13333700	10745600
O75427	O75427	LRCH4_HUMAN	LRCH4	Leucine-rich repeat and calponin homology domain-containing protein 4	12433800	10554600	10592500	10036400	9076860	11013500
Q13435	Q13435;E9PPJ0;H0YEX5	SF3B2_HUMAN	SF3B2	Splicing factor 3B subunit 2	12103100	11800800	10107500	10818800	12454900	11315700
O75390	O75390;A0A0C4DGI3;B4DJV2;H0YIC4	CISY_HUMAN	CS	Citrate synthase, mitochondrial	10205900	9338590	11232800	10035000	8797400	9803200
Q99733;Q99733-2	Q99733;A8MXH2;C9J6D1;C9JZI7;E9PJJ2;E9PKT8;E9PNJ7;E9PNW0;E9PS34;Q99733-2	NP1L4-2_HUMAN;NP1L4_HUMAN	NAP1L4	Nucleosome assembly protein 1-like 4	11194000	11029200	9074640	11248200	10944400	10614200
Q15366;Q15366-2	Q15366;F8VZX2;H3BRU6;H3BSS4;Q15366-2;Q15366-3;Q15366-4;Q15366-5;Q15366-6;Q15366-7;Q15366-8	PCBP2-2_HUMAN;PCBP2_HUMAN	PCBP2	Poly(rC)-binding protein 2	11044000	10932100	9894280	11731900	10173600	12401100
P14866	P14866	HNRPL_HUMAN	HNRNPL	Heterogeneous nuclear ribonucleoprotein L	11410000	10828000	9768980	10499300	10853400	10672400
O75947	O75947	ATP5H_HUMAN	ATP5PD	ATP synthase subunit d, mitochondrial	9903870	11029200	9922430	11034700	11162300	11862100
P62917	P62917;E9PKU4;E9PKZ0;G3V1A1	RL8_HUMAN	RPL8	60S ribosomal protein L8	8952060	8950840	8295350	10677800	11140200	9612880
Q9NR56	Q9NR56;Q9NUK0;A0A0A0MQX8;B1AKI6;C9J4T8;C9JP00;H7C4T5;Q86VM6;Q9NR56-2;Q9NR56-3;Q9NR56-4;Q9NR56-5;Q9NR56-6;Q9NR56-7;Q9NUK0-2;Q9NUK0-3;Q9NUK0-4	MBNL1_HUMAN	MBNL1	Muscleblind-like protein 1	10925700	10353100	9833250	10866700	10083900	10814200
Q15291	Q15291;Q15291-2	RBBP5_HUMAN	RBBP5	Retinoblastoma-binding protein 5	11157800	11305500	10440400	11241100	9480380	12005600
P52272-2	P52272;A0A087X0X3;M0QYQ7;M0R019;M0R0N3;M0R0Y6;M0R2T0;P52272-2	HNRPM-2_HUMAN	HNRNPM	Isoform of P52272, Isoform 2 of Heterogeneous nuclear ribonucleoprotein M	9898820	9637560	10485900	10223400	10029600	10326600
P63208	P63208;E5RJR5;E7ERH2;F8W8N3;P63208-2	SKP1_HUMAN	SKP1	S-phase kinase-associated protein 1	9392080	10185500	10732500	11874500	11591100	11672200
P78371	P78371;F5GWF6;F8VQ14;P78371-2	TCPB_HUMAN	CCT2	T-complex protein 1 subunit beta	11440600	10908300	9079850	10776400	11318000	10553400
P60891	P11908;P21108;P60891;A0A0B4J207;A0A2R8Y7H4;B1ALA9;B7ZB02;H7C540;P11908-2;P60891-2	PRPS1_HUMAN	PRPS1	Ribose-phosphate pyrophosphokinase 1	10387400	11097200	8911790	9693350	10260700	11877800
P30153	P30153;B3KQV6;C9J9C1	2AAA_HUMAN	PPP2R1A	Serine/threonine-protein phosphatase 2A 65 kDa regulatory subunit A alpha isoform	11012600	11752000	11206900	11567300	10348300	10690300
P62266	P62266	RS23_HUMAN	RPS23	40S ribosomal protein S23	10427100	9923200	7495690	11680500	12108200	10638800
P31939	P31939;H7C1S2;P31939-2	PUR9_HUMAN	ATIC	Bifunctional purine biosynthesis protein PURH	11134300	10883300	8773200	9002280	10738600	10730400
Q13263	Q13263;Q13263-2	TIF1B_HUMAN	TRIM28	Transcription intermediary factor 1-beta	10110500	11347600	11036300	11535100	11040800	10729900
P51858	P51858;P51858-2;P51858-3	HDGF_HUMAN	HDGF	Hepatoma-derived growth factor	9913320	9873880	10403500	10980700	10819300	10036700
O00170	O00170;E9PMH2;V9GYQ3	AIP_HUMAN	AIP	AH receptor-interacting protein	11564300	11797600	10353000	10256300	10217200	10178400
Q14697	Q14697;E9PKU7;F5H6X6;Q14697-2	GANAB_HUMAN	GANAB	Neutral alpha-glucosidase AB	10602500	10243100	9436520	10894700	11052000	9628810
P02545	P02545;A0A0C4DGC5;P02545-2;P02545-3;P02545-4;P02545-5;P02545-6;Q5TCI8	LMNA_HUMAN	LMNA	Prelamin-A/C	8623900	5621140	10406800	7642550	7053480	8898800
P42704	P42704	LPPRC_HUMAN	LRPPRC	Leucine-rich PPR motif-containing protein, mitochondrial	9457010	9979300	9692290	10710000	9915460	9379360
Q8N335	Q8N335;C9JFA7;C9JM46	GPD1L_HUMAN	GPD1L	Glycerol-3-phosphate dehydrogenase 1-like protein	11168900	9573290	10955300	7498670	8960550	9864580
P49721	P49721;A0A087WVV1	PSB2_HUMAN	PSMB2	Proteasome subunit beta type-2	10291600	10070800	10022700	8889750	9152020	9548320
B0I1T2	B0I1T2;O94832;A0A3B3IU30;B0I1T2-2;B0I1T2-3;B0I1T2-4;F8WEW9;J3KRL0;J3QRN6;K7EIG7	MYO1G_HUMAN	MYO1G	Unconventional myosin-Ig	9468830	10306000	12676100	10676300	8119050	6966950
P62306	P62306;A0A0B4J254;F8W0W6	RUXF_HUMAN	SNRPF	Small nuclear ribonucleoprotein F	9967890	10019200	9652340	10207400	10898000	10375700
P16189	A0A140T941;A0A140T9Z6;A0A1W2PQS8;B0UXQ0;P16189;P16190;P30512	1A31_HUMAN	HLA-A	Isoform of P01891, HLA class I histocompatibility antigen, A-31 alpha chain	15805400	1136960	8231010	13061500	10681700	10549900
P14868	P14868;H7C278	SYDC_HUMAN	DARS	Aspartate--tRNA ligase, cytoplasmic	10577400	8834400	8293270	9056530	9419530	8972960
O95336	M0R0U3;O95336;M0R1L2;M0R261	6PGL_HUMAN	PGLS	6-phosphogluconolactonase	9503250	10164100	9002240	9379930	10136200	10865800
P05107	P05107;A0A494C0X7;D3DSM0	ITB2_HUMAN	ITGB2	Integrin beta-2	8838570	9074020	12714700	8456680	8282620	9145080
P56537	A0A0U1RQV5;P56537;P56537-2	IF6_HUMAN	EIF6	Eukaryotic translation initiation factor 6	10012500	9844420	9706530	10726400	9511240	10509800
P62249	P62249;M0R1M5;M0R3H0;Q6IPX4	RS16_HUMAN	RPS16	40S ribosomal protein S16	9453630	9019750	8262740	11306100	10914700	9908630
P48741	P17066;P48741	HSP77_HUMAN	HSPA7	Putative heat shock 70 kDa protein 7	10363700	6486100	8259120	11672400	9797830	8663720
O75367;O75367-2;O75367-3	O75367;O75367-2;O75367-3	H2AY-2_HUMAN;H2AY-3_HUMAN;H2AY_HUMAN	H2AFY	Core histone macro-H2A.1	7799910	7850110	8083290	9331890	12208100	8651080
P11940	P11940;Q4VXU2;A0A087WTT1;E7EQV3;E7ERJ7;H0YAP2;H0YAR2;P11940-2;Q4VXU2-2	PABP1_HUMAN	PABPC1	Polyadenylate-binding protein 1	10150600	9344880	9341250	11788100	9376560	11234000
P24666	P24666;G5E9R5;P24666-4	PPAC_HUMAN	ACP1	Low molecular weight phosphotyrosine protein phosphatase	9234900	11629300	9293780	8971360	7935530	10458900
P23396	P23396;E9PL09;F2Z2S8;H0YCJ7;H0YF32;P23396-2	RS3_HUMAN	RPS3	40S ribosomal protein S3	8329680	8846350	10814300	11200800	11671800	10340900
P15121	P15121;E9PCX2	ALDR_HUMAN	AKR1B1	Aldo-keto reductase family 1 member B1	9784210	9664670	7988180	8689020	9445250	11540300
Q12905	Q12905;B4DY09	ILF2_HUMAN	ILF2	Interleukin enhancer-binding factor 2	9884060	10059600	9752520	9364610	9489510	9170390
P20073;P20073-2	P20073;P20073-2	ANXA7-2_HUMAN;ANXA7_HUMAN	ANXA7	Annexin A7	9025130	9698400	9495010	9526040	8423130	9916710
O94973	O94973;A0A0G2JQA4;A0A0G2JQM1;A0A0G2JRF9;A0A0G2JRS3;A0A0G2JS82;E9PNC4;E9PR62;O94973-2;O94973-3	AP2A2_HUMAN	AP2A2	AP-2 complex subunit alpha-2	9787470	10629900	9563680	9265730	8293510	8231290
Q9NUV9	Q9NUV9;G5E9W9	GIMA4_HUMAN	GIMAP4	GTPase IMAP family member 4	8057170	8382790	12356900	7785010	11181400	8583350
P68036	A0A1B0GUS4;P68036;P68036-2;P68036-3	UB2L3_HUMAN	UBE2L3	Ubiquitin-conjugating enzyme E2 L3	10664500	10090800	9902570	9017720	8707230	9165090
Q9UBW5	Q9UBW5;A0A087X188;A0A0A0MT10;Q9UBW5-2;Q9UBW5-3;S4R418	BIN2_HUMAN	BIN2	Bridging integrator 2	11196800	10758400	10570500	8459980	7942850	9228020
P62424	P62424;Q5T8U3	RL7A_HUMAN	RPL7A	60S ribosomal protein L7a	8716770	8213470	6711030	9650600	10502500	9061450
Q9NR45	Q9NR45	SIAS_HUMAN	NANS	Sialic acid synthase	9732810	8663220	8895460	9004410	9285390	8886840
Q1KMD3	Q1KMD3;H3BQZ7	HNRL2_HUMAN	HNRNPUL2	Heterogeneous nuclear ribonucleoprotein U-like protein 2	9507630	9621820	9613040	9655440	10828800	9933980
P62136	P36873;P62136;P62140;A0A087WYY5;C9J9S3;C9JP48;E7ETD8;E9PMD7;F8VR82;F8VYE8;F8W0W8;P36873-2;P62136-2;P62136-3	PP1A_HUMAN	PPP1CA	Serine/threonine-protein phosphatase PP1-alpha catalytic subunit	9860910	9160510	9559900	9657120	7029390	8889350
P13693	P13693;Q56UQ5;A0A0B4J2C3;E9PJF7;J3KPG2;P13693-2;Q5W0H4	TCTP_HUMAN	TPT1	Translationally-controlled tumor protein	9435470	8546930	9275720	10851400	9149940	9881500
O14776;O14776-2	O14776;O14776-2	TCRG1-2_HUMAN;TCRG1_HUMAN	TCERG1	Transcription elongation regulator 1	8995040	8439180	8907550	8499780	10118900	9818490
O43390	O43390;O43390-2;O43390-4	HNRPR_HUMAN	HNRNPR	Heterogeneous nuclear ribonucleoprotein R	6985940	7064870	8839960	9639240	11531400	9994090
P62910	P62910;D3YTB1;F8W727	RL32_HUMAN	RPL32	60S ribosomal protein L32	9534410	9649590	7944680	10456300	10363700	9157090
O75791	O75791;B1AH86	GRAP2_HUMAN	GRAP2	GRB2-related adapter protein 2	9242900	9433800	9390430	9891110	9512780	10112900
P13073	P13073	COX41_HUMAN	COX4I1	Cytochrome c oxidase subunit 4 isoform 1, mitochondrial	7664650	8241120	8026370	9154880	10046300	8447190
P62318;P62318-2	P62318;H3BT13;P62318-2	SMD3-2_HUMAN;SMD3_HUMAN	SNRPD3	Small nuclear ribonucleoprotein Sm D3	7247250	8411010	9041570	9821550	11300200	8558270
P38159	P38159;Q96E39;H3BUY5;P38159-2	RBMX_HUMAN	RBMX	RNA-binding motif protein, X chromosome	8724510	8594760	9139290	8972280	10372000	9605860
P46777	P46777;A0A2R8Y6J3	RL5_HUMAN	RPL5	60S ribosomal protein L5	8924810	9467530	7662000	9862720	10214200	8613060
P12956	P12956;B1AHC9;P12956-2	XRCC6_HUMAN	XRCC6	X-ray repair cross-complementing protein 6	7260670	8270690	10013900	8675430	10345400	9290970
P53396	P53396;P53396-2;P53396-3	ACLY_HUMAN	ACLY	ATP-citrate synthase	7895490	8037540	8658860	9121480	8706570	7343150
P62191	P62191;P62191-2	PRS4_HUMAN	PSMC1	26S proteasome regulatory subunit 4	8512290	8734660	9405060	9662620	9914230	9287590
Q99832	Q99832;Q99832-2;Q99832-3;Q99832-4	TCPH_HUMAN	CCT7	T-complex protein 1 subunit eta	9188730	8392310	8255320	8596610	9162550	8544040
Q96KP4	Q96KP4;Q96KP4-2	CNDP2_HUMAN	CNDP2	Cytosolic non-specific dipeptidase	8925840	10121100	7907640	7968210	8791760	9377760
P46976;P46976-2	P46976;P46976-2	GLYG-2_HUMAN;GLYG_HUMAN	GYG1	Glycogenin-1	9999810	9312320	9554060	9000300	8929200	10644400
P12268	P12268;H0Y4R1	IMDH2_HUMAN	IMPDH2	Inosine-5'-monophosphate dehydrogenase 2	10437000	9065350	7235470	9080810	10847200	9235880
Q13404;Q13404-1;Q13404-2;Q13404-6;Q13404-7	Q13404;A0A0A0MSL3;G3V2F7;Q13404-1;Q13404-2;Q13404-6;Q13404-7;I3L0A0	UB2V1-1_HUMAN;UB2V1-2_HUMAN;UB2V1-6_HUMAN;UB2V1-7_HUMAN;UB2V1_HUMAN	UBE2V1	Ubiquitin-conjugating enzyme E2 variant 1	8657330	8399840	8430800	8718630	7461310	9367870
P09104	P09104;F5H0C8;P09104-2;U3KQP4	ENOG_HUMAN	ENO2	Gamma-enolase	7062600	7030450	9841620	9548590	11608000	10374600
P10599	P10599	THIO_HUMAN	TXN	Thioredoxin	8557200	8502860	8681930	10459400	9648280	9401810
Q9Y2Z0;Q9Y2Z0-2	Q9Y2Z0;Q9Y2Z0-2	SGT1-2_HUMAN;SGT1_HUMAN	SUGT1	Protein SGT1 homolog	8403460	9241190	9367740	9901600	9752050	9462930
P16152	P16152	CBR1_HUMAN	CBR1	Carbonyl reductase [NADPH] 1	6462180	8017400	9006110	8324890	9056840	7830030
P34897;P34897-3	P34897;G3V241;G3V2E4;G3V2W0;G3V3Y8;G3V4T0;G3V4W5;G3V4X0;G3V540;G3V5L0;P34897-2;P34897-3	GLYM-3_HUMAN;GLYM_HUMAN	SHMT2	Serine hydroxymethyltransferase, mitochondrial	9001680	7653640	8984280	8871670	11645400	8421090
P55209;P55209-2	P55209;B7Z9C2;F5H4R6;F8VRJ2;F8VV59;F8VVB5;F8VY35;F8W020;F8W0J6;F8W118;F8W543;H0YH88;H0YHC3;H0YIV4;P55209-2	NP1L1-2_HUMAN;NP1L1_HUMAN	NAP1L1	Nucleosome assembly protein 1-like 1	9276990	9185800	7438990	10486700	9902540	9947600
Q9H2U2;Q9H2U2-2	Q9H2U2;D6RGI1;D6RGV9;H0Y9D8;H0YAK2;Q9H2U2-2;Q9H2U2-3	IPYR2-2_HUMAN;IPYR2_HUMAN	PPA2	Inorganic pyrophosphatase 2, mitochondrial	6702720	8756950	9124410	9945190	9788340	10528500
O75347	O75347;E5RHG6;E5RIW3;E5RJD8;O75347-2	TBCA_HUMAN	TBCA	Tubulin-specific chaperone A	8001040	9258140	9307900	8486550	7772000	6858800
P35659	P35659;A0A494C028;A0A494C198;B4DFG0;H0Y993;P35659-2	DEK_HUMAN	DEK	Protein DEK	10852100	9345820	8845280	7886000	7376460	7945350
P45974;P45974-2	P45974;P45974-2	UBP5-2_HUMAN;UBP5_HUMAN	USP5	Ubiquitin carboxyl-terminal hydrolase 5	9183090	10051200	9141830	8333930	8690950	9194600
P50453	P50453	SPB9_HUMAN	SERPINB9	Serpin B9	9427890	8524020	9300670	8155410	9688270	8217620
Q96C23	Q96C23;H7C1B5;H7C320	GALM_HUMAN	GALM	Aldose 1-epimerase	8694120	7820980	8649610	8946310	7039670	7894310
P46063	P46063	RECQ1_HUMAN	RECQL	ATP-dependent DNA helicase Q1	7912310	8723650	9047830	8333190	7666810	8019190
P06239;P06239-3	P06239;P06239-3;Q573B4	LCK-3_HUMAN;LCK_HUMAN	LCK	Tyrosine-protein kinase Lck	8791210	8027590	9822360	9553520	9777580	9142030
P61970	P61970;H3BRV9	NTF2_HUMAN	NUTF2	Nuclear transport factor 2	9036840	9487010	8303390	9185130	9451000	8831150
Q9BRA2	Q9BRA2;I3L0K2;I3L2R6;I3L3M7	TXD17_HUMAN	TXNDC17	Thioredoxin domain-containing protein 17	9862890	8496680	7634720	8226270	8558350	9003230
P62879	P62873;P62879;B3KVK2;E7EP32;P62879-2	GBB2_HUMAN	GNB2	Guanine nucleotide-binding protein G(I)/G(S)/G(T) subunit beta-2	9706080	8555760	10108600	8019390	7631160	7596780
P30040	P30040;F8VY02	ERP29_HUMAN	ERP29	Endoplasmic reticulum resident protein 29	10132200	9386800	9010350	9007290	8289510	8643090
O95372	O95372;Q5QPN5;Q5QPN9;Q5QPQ1;Q5QPQ2;Q5QPQ3	LYPA2_HUMAN	LYPLA2	Acyl-protein thioesterase 2	8898010	9096110	7851390	8947340	8480390	9062400
P48047	P48047	ATPO_HUMAN	ATP5PO	ATP synthase subunit O, mitochondrial	6630460	5861440	8619560	8892860	9867240	9411050
P20618	P20618	PSB1_HUMAN	PSMB1	Proteasome subunit beta type-1	8970550	8556320	8756190	7785500	8239280	7711420
P46783	P46783;Q9NQ39;A0A2R8Y6L3;A0A2R8Y7H1;A0A2R8YFH6;F6U211;S4R435;A0A1W2PQS6	RS10_HUMAN	RPS10	40S ribosomal protein S10	7879470	7716900	9454550	9571250	9333120	8553010
P62304	P62304	RUXE_HUMAN	SNRPE	Small nuclear ribonucleoprotein E	8326010	8747900	8487490	8030160	8094320	7215320
E9PAV3;E9PAV3-2;Q13765	E9PAV3;E9PAV3-2;F8VNW4;F8VZJ2;F8W0W4;F8W1N5;H0YHX9;Q13765	NACAM-2_HUMAN;NACAM_HUMAN;NACA_HUMAN	NACA	Nascent polypeptide-associated complex subunit alpha, muscle-specific form	8336450	9282100	8686270	9694930	9418850	9360480
Q9Y2Q3	Q9Y2Q3;C9JNT3;E9PFN5;Q9Y2Q3-2;Q9Y2Q3-3;Q9Y2Q3-4	GSTK1_HUMAN	GSTK1	Glutathione S-transferase kappa 1	9651840	7936550	8432930	7667390	6135860	8006390
P54727	P54725;P54727;A0A494C0B4;K7ELW1;K7ENJ0;P54725-2;P54725-3;Q5W0S5	RD23B_HUMAN	RAD23B	UV excision repair protein RAD23 homolog B	9317650	8739720	8023950	8682050	10447100	8825100
O95881	O95881	TXD12_HUMAN	TXNDC12	Thioredoxin domain-containing protein 12	8532730	7991520	7742730	10367400	10365100	9696100
Q13283	Q13283;E5RH42;E5RI46;E5RIF8;E5RIZ6;E5RJU8;Q13283-2	G3BP1_HUMAN	G3BP1	Ras GTPase-activating protein-binding protein 1	8866920	8953970	8855770	10173000	7027610	8744430
Q02543	Q02543;M0R0P7;M0R117;M0R1A7;M0R3D6	RL18A_HUMAN	RPL18A	60S ribosomal protein L18a	8720830	8751220	6467620	10265600	8653610	7661350
Q13761	Q13761;Q13950;A0A0D9SEN7;A0A2R8Y7Z3;I3L0L0;I3L354;Q13761-2;Q13950-2;Q13950-3	RUNX3_HUMAN	RUNX3	Runt-related transcription factor 3	8504210	6561770	7989210	8635300	8645400	9497530
Q13630	Q13630;A0A0J9YX13;E9PKL9;E9PLH9;E9PP14;H0YE90	FCL_HUMAN	TSTA3	GDP-L-fucose synthase	9881530	8866010	8875060	7960390	6780930	8552990
Q15233	Q15233;C9IZL7;C9J4X2;C9JYS8;Q15233-2	NONO_HUMAN	NONO	Non-POU domain-containing octamer-binding protein	8288910	8122230	7709800	8066750	7230990	8252500
Q13561;Q13561-2;Q13561-3	Q13561;F8VRV7;F8VW18;F8W0U6;F8W1I6;Q13561-2;Q13561-3	DCTN2-2_HUMAN;DCTN2-3_HUMAN;DCTN2_HUMAN	DCTN2	Dynactin subunit 2	8512290	7928490	8206210	8430710	8953740	9191800
P61960	P61960;P61960-2	UFM1_HUMAN	UFM1	Ubiquitin-fold modifier 1	8132220	7560310	7801730	8303380	8392270	10379900
Q16836;Q16836-2;Q16836-3	Q16836;A0A0A0MSE2;A0A0D9SFP2;A0A1W2PNM1;A0A1W2PP40;A0A1W2PQ55;A0A1W2PQC2;A0A1W2PQV5;A0A1W2PRT2;E9PF18;Q16836-2;Q16836-3	HCDH-2_HUMAN;HCDH-3_HUMAN;HCDH_HUMAN	HADH	Hydroxyacyl-coenzyme A dehydrogenase, mitochondrial	7914810	8501550	6952810	7246690	7435150	8593130
P60953	P60953	CDC42_HUMAN	CDC42	Cell division control protein 42 homolog	9189680	8104850	10327400	8970600	6734690	8049110
P29466;P29466-2	P29466;G3V169;P29466-2;P29466-3;P29466-4;P29466-5	CASP1-2_HUMAN;CASP1_HUMAN	CASP1	Caspase-1	9054020	8898250	8399940	8458620	6623580	8867560
Q01844;Q01844-3;Q01844-5;Q01844-6	Q01844;A0A0D9SFL3;B0QYK0;C9JGE3;H7BY36;Q01844-2;Q01844-3;Q01844-5;Q01844-6	EWS-3_HUMAN;EWS-5_HUMAN;EWS-6_HUMAN;EWS_HUMAN	EWSR1	RNA-binding protein EWS	8579390	9047190	8771250	9117140	8548080	9309950
O43516;O43516-3	O43516;E9PB87;O43516-2;O43516-3;O43516-4	WIPF1-3_HUMAN;WIPF1_HUMAN	WIPF1	WAS/WASL-interacting protein family member 1	9055110	7610780	7471180	9668160	9148230	9015370
P12081	P12081;B3KWE1;P12081-2;P12081-3;P12081-4	SYHC_HUMAN	HARS	Histidine--tRNA ligase, cytoplasmic	7458130	7838470	8966200	7610590	7985560	7740670
P11766	P11766	ADHX_HUMAN	ADH5	Alcohol dehydrogenase class-3	8967710	8613050	8019000	7776320	8556210	9064090
P35244	P35244;B5MC59	RFA3_HUMAN	RPA3	Replication protein A 14 kDa subunit	8956550	9009420	8023800	8718650	8806850	9893570
P50502	P50502;Q8NFI4	F10A1_HUMAN	ST13	Hsc70-interacting protein	8421650	8533880	7171250	8738310	8095530	9097660
Q9UMS4	Q9UMS4;F5GY56	PRP19_HUMAN	PRPF19	Pre-mRNA-processing factor 19	8308040	8792650	7860080	8537090	7780460	9006720
Q9UI08;Q9UI08-2	Q9UI08;A0A087WYI2;G3V2K5;G3V3G2;G3V535;G3V5F7;Q9UI08-2;Q9UI08-3;Q9UI08-4;Q9UI08-5	EVL-2_HUMAN;EVL_HUMAN	EVL	Ena/VASP-like protein	8122020	8169860	7464950	8038210	8408220	8035920
P43487;P43487-2	P43487;C9JXG8;F6WQW2;P43487-2	RANG-2_HUMAN;RANG_HUMAN	RANBP1	Ran-specific GTPase-activating protein	8430810	9209640	7433410	8869950	9864970	8097380
P11413;P11413-2;P11413-3	P11413;P11413-2;P11413-3	G6PD-2_HUMAN;G6PD-3_HUMAN;G6PD_HUMAN	G6PD	Glucose-6-phosphate 1-dehydrogenase	8442590	8640240	8675590	8215110	8674030	8003190
P25789	P25789;H0YKS0;H0YKT8;H0YL69;H0YLC2;H0YMA1;H0YMV3;H0YMZ1;H0YN18;P25789-2	PSA4_HUMAN	PSMA4	Proteasome subunit alpha type-4	8346410	8441610	7404070	7265440	7326620	7998500
P78344	P78344;D3DQV9;H0Y3P2;P78344-2	IF4G2_HUMAN	EIF4G2	Eukaryotic translation initiation factor 4 gamma 2	7882130	8257070	8642670	8737940	7527700	7900960
P21266	P21266;A0A0A0MTN3	GSTM3_HUMAN	GSTM3	Glutathione S-transferase Mu 3	6677180	13836900	7044370	4464430	7060430	11940800
Q9H0U4	Q92928;Q9H0U4;E9PLD0	RAB1B_HUMAN	RAB1B	Ras-related protein Rab-1B	7739830	7998770	7406510	8880310	8838060	7711140
Q14919;Q14919-2	Q14919;C9JCC6;E9PNC7;E9PQX9;Q14919-2	NC2A-2_HUMAN;NC2A_HUMAN	DRAP1	Dr1-associated corepressor	7685130	7525600	8130790	8310780	9281680	8097590
Q99729-2;Q99729-3	Q99729;D6R9P3;D6RBZ0;D6RD18;Q99729-2;Q99729-3;Q99729-4	ROAA-2_HUMAN;ROAA-3_HUMAN	HNRNPAB	Isoform of Q99729, Isoform 2 of Heterogeneous nuclear ribonucleoprotein A/B	6993640	7697620	7853830	7631520	9232060	8148430
P26368;P26368-2	P26368;K7ENG2;P26368-2	U2AF2-2_HUMAN;U2AF2_HUMAN	U2AF2	Splicing factor U2AF 65 kDa subunit	7974780	7758560	8592050	8465860	8655660	8608350
P09525	P09525;P09525-2;Q6P452	ANXA4_HUMAN	ANXA4	Annexin A4	7972050	8800790	8008720	6688990	6634190	7448890
P15880	P15880;E9PQD7;H0YEN5	RS2_HUMAN	RPS2	40S ribosomal protein S2	7821050	7460080	7210950	9406010	9137000	8301960
Q9HC38-2	Q9HC38;F6TLX2;I3L3Q4;Q9HC38-2;Q9HC38-3	GLOD4-2_HUMAN	GLOD4	Isoform of Q9HC38, Isoform 2 of Glyoxalase domain-containing protein 4	7816770	8182470	7439010	6882040	7569740	9152970
Q09028;Q09028-3	Q09028;Q09028-2;Q09028-3;Q09028-4	RBBP4-3_HUMAN;RBBP4_HUMAN	RBBP4	Histone-binding protein RBBP4	8950900	9011170	7926200	9045250	8600040	9092820
P47985	P0C7P4;P47985	UCRI_HUMAN	UQCRFS1	Cytochrome b-c1 complex subunit Rieske, mitochondrial	7706330	7254850	8200720	8774160	8213570	8892550
P48637	P48637;A0A2R8Y430;A0A2R8Y5T7;P48637-2	GSHB_HUMAN	GSS	Glutathione synthetase	8046390	7983970	7234450	7174440	7914590	8212280
P62906	P62906	RL10A_HUMAN	RPL10A	60S ribosomal protein L10a	5915990	6513250	7119010	7341780	9842620	5717490
P49591	P49591;Q5T5C7	SYSC_HUMAN	SARS	Serine--tRNA ligase, cytoplasmic	7184050	7518710	8343820	7073180	6848590	7337150
Q13951-2	Q13951;A0A494C0A9;H3BSC0;J3KRT0;Q13951-2	PEBB-2_HUMAN	CBFB	Isoform of Q13951, Isoform 2 of Core-binding factor subunit beta	8065300	8983490	8452990	8977710	8202180	8991920
Q03252	Q03252	LMNB2_HUMAN	LMNB2	Lamin-B2	8241680	8261500	7885990	7039260	7413730	8424410
P06730;P06730-2;P06730-3	P06730;D6RBW1;H0Y8J7;P06730-2;P06730-3	IF4E-2_HUMAN;IF4E-3_HUMAN;IF4E_HUMAN	EIF4E	Eukaryotic translation initiation factor 4E	8444370	8347000	7870630	7931170	7918480	7574040
Q01469	Q01469;I6L8B7	FABP5_HUMAN	FABP5	Fatty acid-binding protein 5	6635370	7776390	6362370	9287330	10599200	6799640
Q13094	Q13094;A0A0D9SGG1;E7ESF6	LCP2_HUMAN	LCP2	Lymphocyte cytosolic protein 2	8374910	8402900	8123120	7598460	7832610	8398890
Q92888;Q92888-3	Q92888;M0QYC1;M0QZR4;M0R2C7;Q92888-2;Q92888-3;Q92888-4	ARHG1-3_HUMAN;ARHG1_HUMAN	ARHGEF1	Rho guanine nucleotide exchange factor 1	8080120	8717760	9684860	7475060	8561110	6672920
P09960	P09960;P09960-4	LKHA4_HUMAN	LTA4H	Leukotriene A-4 hydrolase	7625100	7743530	7555460	7765210	6837810	8018930
P10644	P10644;K7EM13;K7EPB2;P10644-2	KAP0_HUMAN	PRKAR1A	cAMP-dependent protein kinase type I-alpha regulatory subunit	8117320	7433510	7291540	6712130	8022320	7969220
Q15287;Q15287-2;Q15287-3	Q15287;H3BMM9;H3BMS0;H3BTC0;H3BV80;Q15287-2;Q15287-3	RNPS1-2_HUMAN;RNPS1-3_HUMAN;RNPS1_HUMAN	RNPS1	RNA-binding protein with serine-rich domain 1	8372120	8926550	7201470	9044290	8800810	7630740
O95319;O95319-2;O95319-3;O95319-4;O95319-5	O95319;A0A0J9YX66;A0A0J9YXJ0;A0A1B0GU44;A0A1B0GUN8;E9PC62;O95319-2;O95319-3;O95319-4;O95319-5;Q5VZZ6;V9GYD9	CELF2-2_HUMAN;CELF2-3_HUMAN;CELF2-4_HUMAN;CELF2-5_HUMAN;CELF2_HUMAN	CELF2	CUGBP Elav-like family member 2	7381050	7176090	5975740	7542720	7103620	7639340
Q8N163	Q8N163;A0A087X2B6;G3V119;H0YB24;Q8N163-2	CCAR2_HUMAN	CCAR2	Cell cycle and apoptosis regulator protein 2	7818510	8116900	7922980	7605570	7641450	8455110
O94903	O94903;E5RFX7;E5RG77;H0YBG2	PLPHP_HUMAN	PLPBP	Pyridoxal phosphate homeostasis protein	7867970	7879740	7389170	7274690	6990870	8087580
P43686	P43686;P43686-2	PRS6B_HUMAN	PSMC4	26S proteasome regulatory subunit 6B	7807030	7779800	7144140	8400640	8478200	8297490
P13489	P13489;E9PIK5;E9PIM9;E9PLZ3;E9PMA9;E9PMI1;E9PMJ3;E9PMN0;E9PR82	RINI_HUMAN	RNH1	Ribonuclease inhibitor	6613580	7141180	7422100	8753010	8404560	9154450
P62280	P62280;M0QZC5;M0R1H6	RS11_HUMAN	RPS11	40S ribosomal protein S11	6642200	6558970	5932640	8250840	8893840	7045800
P08575;P08575-10;P08575-4;P08575-5;P08575-6;P08575-7;P08575-8;P08575-9	P08575;A0A075B788;A0A0G2JNW2;A0A140TA68;A0A140TA77;E9PKH0;M3ZCP1;P08575-10;P08575-4;P08575-5;P08575-6;P08575-7;P08575-8;P08575-9	PTPRC-10_HUMAN;PTPRC-4_HUMAN;PTPRC-5_HUMAN;PTPRC-6_HUMAN;PTPRC-7_HUMAN;PTPRC-8_HUMAN;PTPRC-9_HUMAN;PTPRC_HUMAN	PTPRC	Receptor-type tyrosine-protein phosphatase C	6331610	5975020	7453760	8318800	8162970	5463580
O00422;O00422-2	O00422;O00422-2;U3KQ12	SAP18-2_HUMAN;SAP18_HUMAN	SAP18	Histone deacetylase complex subunit SAP18	7905470	7317640	6479760	7718850	7219970	7423310
P24752	P24752	THIL_HUMAN	ACAT1	Acetyl-CoA acetyltransferase, mitochondrial	7617000	7641130	7167360	8077210	6767970	8132160
P18124	P18124;A8MUD9	RL7_HUMAN	RPL7	60S ribosomal protein L7	7495090	7468230	5081520	7265940	6801750	4950570
P50995;P50995-2	P50995;P50995-2	ANX11-2_HUMAN;ANX11_HUMAN	ANXA11	Annexin A11	7646400	8592280	7696240	6451830	7287010	7161930
P28838-2	P28838;P28838-2	AMPL-2_HUMAN	LAP3	Isoform of P28838, Isoform 2 of Cytosol aminopeptidase	6999640	7970450	6478760	7063390	6912370	6709110
P63165	G2XKQ0;P63165;B8ZZJ0;B8ZZN6;B9A032	SUMO1_HUMAN	SUMO1	Small ubiquitin-related modifier 1	8170030	7785580	7188510	8145960	8185050	7448570
Q9UGI8	Q9UGI8;Q9UGI8-2	TES_HUMAN	TES	Testin	8826140	8308210	7637570	6538520	6930990	7310280
Q9UMX0	Q9UMX0;Q9UMX0-2;Q9UMX0-4	UBQL1_HUMAN	UBQLN1	Ubiquilin-1	7946570	7962780	6911870	8078810	8366750	7630430
P62753	P62753;A2A3R5	RS6_HUMAN	RPS6	40S ribosomal protein S6	5937610	5919320	5156990	8055610	8482440	6908370
Q15717;Q15717-2	Q15717;M0QZR9;M0R055;Q15717-2	ELAV1-2_HUMAN;ELAV1_HUMAN	ELAVL1	ELAV-like protein 1	7527490	7519540	6757300	7806150	8950490	8118800
Q07020;Q07020-2	Q07020;A0A075B7A0;F8VYV2;G3V203;H0YHA7;J3QQ67;Q07020-2	RL18-2_HUMAN;RL18_HUMAN	RPL18	60S ribosomal protein L18	6873330	6881980	4544940	7080870	7137840	5483630
Q3YEC7	Q3YEC7;H0Y4Z8;Q3YEC7-2	RABL6_HUMAN	RABL6	Rab-like protein 6	7948510	7515500	8077470	7069550	7295870	7652770
P0C0S5;Q71UI9;Q71UI9-4	P0C0S5;Q71UI9;A0A494C189;C9J0D1;C9J386;Q71UI9-2;Q71UI9-3;Q71UI9-4	H2AV-4_HUMAN;H2AV_HUMAN;H2AZ_HUMAN	H2AFV;H2AFZ	Histone H2A.Z	5010990	4630700	6310610	6034820	9460490	6807020
P22392;P22392-2	O60361;P22392;P22392-2;Q32Q12	NDKB-2_HUMAN;NDKB_HUMAN	NME2	Nucleoside diphosphate kinase B	7651140	6874500	6927040	6887250	7509830	6592360
P20701;P20701-2	P20701;B4DQ77;P20701-2	ITAL-2_HUMAN;ITAL_HUMAN	ITGAL	Integrin alpha-L	6958710	6663820	9169410	6375920	6100430	6954180
Q16531	Q16531;F5GWI0;F5GY55;F5GYG8;F5GZY8;F5H2L3	DDB1_HUMAN	DDB1	DNA damage-binding protein 1	7458160	7840400	7381170	7341290	6977380	7063020
P23526	P23526;P23526-2	SAHH_HUMAN	AHCY	Adenosylhomocysteinase	7724430	8730760	6786210	7232250	7239320	6581890
P99999	P99999;C9JFR7	CYC_HUMAN	CYCS	Cytochrome c	5763470	5258920	7452450	6801750	7744140	7215940
Q15102	Q15102;M0R389	PA1B3_HUMAN	PAFAH1B3	Platelet-activating factor acetylhydrolase IB subunit gamma	7535280	7617530	7091650	6851700	7961150	7694490
Q07812;Q07812-2;Q07812-8	Q07812;H0YA56;I6LPK7;K4JQN1;Q07812-2;Q07812-4;Q07812-5;Q07812-6;Q07812-7;Q07812-8	BAX-2_HUMAN;BAX-8_HUMAN;BAX_HUMAN	BAX	Apoptosis regulator BAX	7526330	7758000	8165740	6666380	6877980	5250030
Q9NVJ2	Q96BM9;Q9NVJ2	ARL8B_HUMAN	ARL8B	ADP-ribosylation factor-like protein 8B	6865810	6608340	7040590	7696930	7533480	7334320
Q01085-2	P31483;Q01085;A6NKZ9;C9JTN7;E5RG67;E5RGV5;E7ETC0;E7ETJ9;F8W8I6;H7BY49;P31483-2;P31483-3;Q01085-2	TIAR-2_HUMAN	TIAL1	Isoform of Q01085, Isoform 2 of Nucleolysin TIAR	7636870	7263810	6929900	7290390	7397770	7212960
P11586	P11586;A0A384N5Y3;A0A494C1T2;F5H2F4;V9GYY3;V9GZ78	C1TC_HUMAN	MTHFD1	C-1-tetrahydrofolate synthase, cytoplasmic	7046520	6913650	6070800	7035520	8801350	6131360
Q9Y230	Q9Y230;Q9Y230-2	RUVB2_HUMAN	RUVBL2	RuvB-like 2	7654710	7531140	6639100	7322060	7034230	7396290
P39019	P39019;M0QXK4;M0QYF7;M0R140;M0R2L9	RS19_HUMAN	RPS19	40S ribosomal protein S19	6875060	6022470	7069250	7516480	8111070	7381280
P57737-3	P57737;A0A0A6YYL4;E7EP81;I3L167;P57737-2;P57737-3;P57737-4	CORO7-3_HUMAN	CORO7	Isoform of P57737, Isoform 3 of Coronin-7	7802500	7017680	7426290	6916160	6211450	6954020
P13473;P13473-2;P13473-3	P13473;H0YCG2;P13473-2;P13473-3	LAMP2-2_HUMAN;LAMP2-3_HUMAN;LAMP2_HUMAN	LAMP2	Lysosome-associated membrane glycoprotein 2	7397370	6333260	9102600	7111170	6998820	8827250
Q15149-4	Q15149;E9PMV1;H0YDN1;Q15149-2;Q15149-3;Q15149-4;Q15149-5;Q15149-6;Q15149-7;Q15149-8;Q15149-9	PLEC-4_HUMAN	PLEC	Isoform of Q15149, Isoform 4 of Plectin	7164910	6493000	8032490	8672510	4239900	4883830
P54577	P54577;A0A0C4DGZ5	SYYC_HUMAN	YARS	Tyrosine--tRNA ligase, cytoplasmic	7595450	7202280	7496020	6660650	6494420	6974490
Q15019;Q15019-2	Q15019;B5MCX3;C9IY94;C9J2Q4;C9J938;C9JB25;H7C310;Q15019-2;Q15019-3	SEPT2-2_HUMAN;SEPT2_HUMAN	SEPT2	Septin-2	7460760	7012250	7301980	6088630	6756070	7410340
O14979	O14979;A0A087WUK2;O14979-2;O14979-3	HNRDL_HUMAN	HNRNPDL	Heterogeneous nuclear ribonucleoprotein D-like	5621660	6370390	6609260	6917410	6565580	6356400
P61254	P61254;Q9UNX3;E5RIT6;J3KS10;J3QQV1;J3QRC4;J3QRI7;J3QQQ9	RL26_HUMAN	RPL26	60S ribosomal protein L26	6172090	6506090	5308590	7776810	8441830	6706430
Q14204	Q14204;A0A2R8Y6H2;A0A2R8Y706;A0A2R8YFZ7	DYHC1_HUMAN	DYNC1H1	Cytoplasmic dynein 1 heavy chain 1	6340000	6994750	7741380	6976660	6931820	5773790
P23381	P23381;G3V277;G3V3H8;G3V3Y5;P23381-2	SYWC_HUMAN	WARS	Tryptophan--tRNA ligase, cytoplasmic	8373730	6809490	6698870	5331490	5200420	6972740
P51149	P51149;C9IZZ0;C9J4S4;C9J4V0;C9J592;C9J7D1;C9J8S3	RAB7A_HUMAN	RAB7A	Ras-related protein Rab-7a	5899080	6568490	6612570	7668760	7495380	6761830
Q9UHV9	Q9UHV9	PFD2_HUMAN	PFDN2	Prefoldin subunit 2	6898050	7015980	6546610	7070160	7993630	6855760
Q15942	Q15942;H0Y2Y8;Q15942-2	ZYX_HUMAN	ZYX	Zyxin	7492680	7262120	6695290	7813700	6628170	7279520
P42766	P42766;F2Z388	RL35_HUMAN	RPL35	60S ribosomal protein L35	5352170	5192750	4421660	6749630	7504990	5551210
P41240	P41240;H3BN15;H3BUM9	CSK_HUMAN	CSK	Tyrosine-protein kinase CSK	7626570	7831340	7405380	6775120	6491780	6269400
P47914	P47914;A0A3B3ITT5	RL29_HUMAN	RPL29	60S ribosomal protein L29	7356580	6465110	5223200	6691540	6895990	6090380
O00154;O00154-4;O00154-6;O00154-7	O00154;K7EKP8;O00154-2;O00154-3;O00154-4;O00154-5;O00154-6;O00154-7	BACH-4_HUMAN;BACH-6_HUMAN;BACH-7_HUMAN;BACH_HUMAN	ACOT7	Cytosolic acyl coenzyme A thioester hydrolase	7359820	7922240	6152700	7079450	6882820	5742080
P50552	P50552	VASP_HUMAN	VASP	Vasodilator-stimulated phosphoprotein	6963800	6154470	6551520	7112120	6620430	6544860
P00505	P00505;P00505-2	AATM_HUMAN	GOT2	Aspartate aminotransferase, mitochondrial	6731020	5536730	5947200	7024240	5590190	7426520
Q16698;Q16698-2	Q16698;E5RFV2;E5RJD2;E5RJG7;Q16698-2	DECR-2_HUMAN;DECR_HUMAN	DECR1	2,4-dienoyl-CoA reductase, mitochondrial	7219540	6650150	6554960	6080990	5732560	7162150
Q5JTV8	Q5JTV8;A0A0A0MSK5;H0YD16;J3KN66;Q5JTV8-2;Q5JTV8-3	TOIP1_HUMAN	TOR1AIP1	Torsin-1A-interacting protein 1	6714940	6735690	7146680	6933070	5827680	6341550
O75131	O75131;A0A087WYQ3;E5RHZ0;H0YB26	CPNE3_HUMAN	CPNE3	Copine-3	6831420	6636790	6854270	5922270	6428180	6760720
O60216	O60216;E5RFV8;E5RIN7;E5RJK5;E5RJW1	RAD21_HUMAN	RAD21	Double-strand-break repair protein rad21 homolog	7162110	7443870	7174060	6926550	7213200	7509510
Q9BXP5;Q9BXP5-2;Q9BXP5-3;Q9BXP5-4	Q9BXP5;H7C3A1;Q9BXP5-2;Q9BXP5-3;Q9BXP5-4;Q9BXP5-5	SRRT-2_HUMAN;SRRT-3_HUMAN;SRRT-4_HUMAN;SRRT_HUMAN	SRRT	Serrate RNA effector molecule homolog	7296540	7157830	6695310	6919990	6751300	7458180
Q16181	Q16181;A0A0U1RRE1;A0A0U1RRH9;E7EPK1;E7ES33;G3V1Q4;Q16181-2	SEPT7_HUMAN	SEPT7	Septin-7	6297320	6001180	6263090	5728700	6790940	6102240
P62750	P62750;A8MUS3;H7BY10;K7EJV9;K7EMA7;K7ERT8	RL23A_HUMAN	RPL23A	60S ribosomal protein L23a	6681150	6115360	5415290	6950640	7325110	5953110
P40227	P40227;P40227-2	TCPZ_HUMAN	CCT6A	T-complex protein 1 subunit zeta	6539870	6051380	6302180	6285390	6800980	6309430
Q14974	Q14974;J3KTM9;Q14974-2	IMB1_HUMAN	KPNB1	Importin subunit beta-1	6830250	7409430	7605270	7194330	6800680	6561950
Q99798	Q99798;A2A274	ACON_HUMAN	ACO2	Aconitate hydratase, mitochondrial	6449640	5907690	6186770	6308190	6139470	7110910
P02795	P02795;P04732;P13640;P80297;Q8N339;P13640-2	MT2_HUMAN	MT2A	Metallothionein-2	5168120	4292930	8438110	10935700	6917670	7744120
O15042;O15042-2	O15042;E7ET15;H7C4V2;O15042-2;O15042-3	SR140-2_HUMAN;SR140_HUMAN	U2SURP	U2 snRNP-associated SURP motif-containing protein	6069010	6883740	7349560	6480140	6741990	6341840
P18887	P18887;F5H8D7	XRCC1_HUMAN	XRCC1	DNA repair protein XRCC1	7623040	6480470	5800650	6350150	7191870	8212380
P31040	P31040;D6RFM5;A0A494C1T6	SDHA_HUMAN	SDHA	Succinate dehydrogenase [ubiquinone] flavoprotein subunit, mitochondrial	6278290	6510360	6217840	6789710	7096650	7073670
P35606;P35606-2	P35606;P35606-2	COPB2-2_HUMAN;COPB2_HUMAN	COPB2	Coatomer subunit beta'	6635820	6987200	7567790	6817030	6053620	6203080
P36957	P36957;P36957-2	ODO2_HUMAN	DLST	Dihydrolipoyllysine-residue succinyltransferase component of 2-oxoglutarate dehydrogenase complex, mitochondrial	5465480	5355750	6631110	7009390	6985220	7347270
P46109	P46109	CRKL_HUMAN	CRKL	Crk-like protein	7023810	6904190	6294440	6590320	7430910	7524030
P35637;P35637-2	P35637;H3BPE7;P35637-2	FUS-2_HUMAN;FUS_HUMAN	FUS	RNA-binding protein FUS	6578890	7795200	6625220	7736130	7043060	7756540
Q07666	Q07666;Q07666-2;Q07666-3	KHDR1_HUMAN	KHDRBS1	KH domain-containing, RNA-binding, signal transduction-associated protein 1	5984520	5995790	7476300	6917950	7218560	7054200
Q12906-7	Q12906;Q96SI9;Q12906-2;Q12906-3;Q12906-4;Q12906-5;Q12906-6;Q12906-7;Q96SI9-2	ILF3-7_HUMAN	ILF3	Isoform of Q12906, Isoform 7 of Interleukin enhancer-binding factor 3	5711810	6173910	7939890	6678630	8434730	6486860
Q96IU4	Q96IU4;F8W9U3;Q96IU4-2	ABHEB_HUMAN	ABHD14B	Protein ABHD14B	7358170	7569880	7076590	3819690	8274210	4901930
P11177;P11177-2	P11177;C9J634;F8WF02;P11177-2;P11177-3	ODPB-2_HUMAN;ODPB_HUMAN	PDHB	Pyruvate dehydrogenase E1 component subunit beta, mitochondrial	6580090	7098030	6426170	7164030	7294630	7397390
P23588	P23588;E7EX17;P23588-2	IF4B_HUMAN	EIF4B	Eukaryotic translation initiation factor 4B	7208750	6961380	6134760	6823410	6018270	6616650
P62891;Q59GN2	P62891;Q59GN2	R39L5_HUMAN;RL39_HUMAN	RPL39;RPL39P5	60S ribosomal protein L39	6815930	6964890	5414840	7167600	7872440	6631200
P00390;P00390-2	P00390;P00390-2;P00390-3;P00390-4;P00390-5	GSHR-2_HUMAN;GSHR_HUMAN	GSR	Glutathione reductase, mitochondrial	7454110	6610850	7025090	5581570	5786930	6203980
Q13177	Q13177	PAK2_HUMAN	PAK2	Serine/threonine-protein kinase PAK 2	6888440	6761720	6462620	6628000	6246400	6195050
P05198	P05198;G3V4T5;H0YJS4	IF2A_HUMAN	EIF2S1	Eukaryotic translation initiation factor 2 subunit 1	7066890	7055390	6845500	6668680	6384230	6183160
P56385	P56385	ATP5I_HUMAN	ATP5ME	ATP synthase subunit e, mitochondrial	6309300	6315270	5926030	6182470	6189410	6748750
P22102	P22102	PUR2_HUMAN	GART	Trifunctional purine biosynthetic protein adenosine-3	6894570	6987600	5969760	6471270	6070590	6837930
O75608;O75608-2	O75608;A0A087X1K9;B4DP64;O75608-2	LYPA1-2_HUMAN;LYPA1_HUMAN	LYPLA1	Acyl-protein thioesterase 1	6709450	6215260	5790550	7109150	7501540	7317080
P00492	P00492	HPRT_HUMAN	HPRT1	Hypoxanthine-guanine phosphoribosyltransferase	6244330	6406940	5695970	6161960	7140350	6461260
P10768	P10768	ESTD_HUMAN	ESD	S-formylglutathione hydrolase	5997220	6993360	6377710	5825740	7145540	6679690
P32969	P32969;D6RAN4;E7ESE0	RL9_HUMAN	RPL9P9	60S ribosomal protein L9	6126660	6096150	6668030	7934500	8101320	6870980
P40306	P40306;J3QQN1	PSB10_HUMAN	PSMB10	Proteasome subunit beta type-10	6889220	6928500	5775280	6048400	6308300	6645130
P60228	P60228;E5RGA2;E5RHS5	EIF3E_HUMAN	EIF3E	Eukaryotic translation initiation factor 3 subunit E	7107190	7202360	6861420	6612120	6294770	6103480
P82979	H0YHG0;P82979;F8VS12;F8VZQ9	SARNP_HUMAN	SARNP	SAP domain-containing ribonucleoprotein	5148550	5338910	5990060	5517590	6695870	5698870
P14550	P14550	AK1A1_HUMAN	AKR1A1	Aldo-keto reductase family 1 member A1	7128690	6331230	5396770	5588770	6019300	6406320
P27144	P27144;D3DQ64	KAD4_HUMAN	AK4	Adenylate kinase 4, mitochondrial	4139310	4423410	3707040	7202160	9393140	9098040
P32942	P32942;K7ERN2	ICAM3_HUMAN	ICAM3	Intercellular adhesion molecule 3	4533180	4000270	5695810	6417020	5822990	5683780
Q9NYL9	Q9NYL9;H0YNU8	TMOD3_HUMAN	TMOD3	Tropomodulin-3	6993040	7036070	6593910	6794990	7571940	6803800
Q08211	Q08211	DHX9_HUMAN	DHX9	ATP-dependent RNA helicase A	6223650	6595980	6820250	6759620	6361130	6115130
Q13185	Q13185	CBX3_HUMAN	CBX3	Chromobox protein homolog 3	6378700	7229380	6687600	7028430	6661540	6378100
P49189	P49189;P49189-2;P49189-3	AL9A1_HUMAN	ALDH9A1	4-trimethylaminobutyraldehyde dehydrogenase	6284090	6880960	5863540	5670870	6216920	7446440
O43684;O43684-2	O43684;J3QSX4;J3QT28;O43684-2	BUB3-2_HUMAN;BUB3_HUMAN	BUB3	Mitotic checkpoint protein BUB3	6400400	6393270	6041600	6242370	5258730	6270850
O43396	O43396;K7EML9;K7ER96	TXNL1_HUMAN	TXNL1	Thioredoxin-like protein 1	6035260	6671320	5994470	7469450	7326240	7176050
O43447	O43447;C9JQD4;O43447-2	PPIH_HUMAN	PPIH	Peptidyl-prolyl cis-trans isomerase H	6489630	7006540	5900440	6089240	6475520	7183080
P38117	P38117;M0QY67	ETFB_HUMAN	ETFB	Electron transfer flavoprotein subunit beta	5523260	5040300	5733440	5566870	6108770	5458090
P42768	P42768	WASP_HUMAN	WAS	Wiskott-Aldrich syndrome protein	6678040	6191570	6515650	6355760	6010550	5970320
P41250	P41250	GARS_HUMAN	GARS	Glycine--tRNA ligase	7378580	6240500	7299270	6453290	6419840	6171500
Q9UK45	Q9UK45;A0A087X2I5	LSM7_HUMAN	LSM7	U6 snRNA-associated Sm-like protein LSm7	6307480	6571570	6061170	6263120	6403220	6797800
Q96SI9;Q96SI9-2	Q96SI9;Q96SI9-2	STRBP-2_HUMAN;STRBP_HUMAN	STRBP	Spermatid perinuclear RNA-binding protein	6449620	5599410	6183890	5926150	6895630	7218130
Q9GZZ1	Q9GZZ1;E7EQ69	NAA50_HUMAN	NAA50	N-alpha-acetyltransferase 50	6672190	6355670	6624710	6955270	5838940	6086150
O43598	O43598;H0Y8X4	DNPH1_HUMAN	DNPH1	2'-deoxynucleoside 5'-phosphate N-hydrolase 1	5715910	6191080	5495700	6592570	7025410	6438030
Q99829	Q99829;A6PVH9;B0QZ18;E7ENH5;F2Z2V0;Q5JX44;Q5JX55;Q5JX56;Q5JX58;Q5JX59;Q5JX60	CPNE1_HUMAN	CPNE1	Copine-1	7721270	6266230	6190970	6105720	5150090	7710820
P19971	P19971;A0A494BZZ4;A0A494C0L3;C9JGI3;P19971-2	TYPH_HUMAN	TYMP	Thymidine phosphorylase	6386320	6563760	6758620	5803030	4512730	5599650
Q9UKK9	Q9UKK9;A6NFX8	NUDT5_HUMAN	NUDT5	ADP-sugar pyrophosphatase	5744720	5693630	6065280	6817850	7105810	6470300
P68402	P68402;P68402-2;P68402-3;P68402-4	PA1B2_HUMAN	PAFAH1B2	Platelet-activating factor acetylhydrolase IB subunit beta	6153110	6024520	5057860	6063230	6109140	6691100
P31150	P31150;G5E9U5	GDIA_HUMAN	GDI1	Rab GDP dissociation inhibitor alpha	6118990	6415090	6867300	6402960	5833390	5936160
Q86VP6	Q86VP6;A0A0C4DGH5;Q86VP6-2	CAND1_HUMAN	CAND1	Cullin-associated NEDD8-dissociated protein 1	6395200	6651310	6293260	6260500	6200070	5761040
P33316-2	P33316;A0A0C4DGL3;H0YKC5;H0YKI0;H0YMM5;H0YMP1;H0YNJ9;H0YNW5;P33316-2	DUT-2_HUMAN	DUT	Isoform of P33316, Isoform 2 of Deoxyuridine 5'-triphosphate nucleotidohydrolase, mitochondrial	6540940	7289260	5770550	8489630	4278260	6884770
O14980	O14980;C9IZS4;C9J673;C9JKM9;C9JQ02;C9JV99;H7BZC5	XPO1_HUMAN	XPO1	Exportin-1	6410870	7248150	6681150	6289250	6231390	5545820
P49720	P49720;A0A087WUL2	PSB3_HUMAN	PSMB3	Proteasome subunit beta type-3	6929780	6268410	5698380	5433560	5913510	6292520
P59768	P59768;G3V2C9;G3V2N0;G3V3J9;G3V415	GBG2_HUMAN	GNG2	Guanine nucleotide-binding protein G(I)/G(S)/G(O) subunit gamma-2	7126560	6362350	9353080	7755820	6717720	6573740
Q9NSI8;Q9NSI8-3	O94885;Q9NSI8;A0A2R8Y4K8;Q9NSI8-3;S6FRS6	SAMN1-3_HUMAN;SAMN1_HUMAN	SAMSN1	SAM domain-containing protein SAMSN-1	4504770	4387700	5570730	6053180	6527370	5125350
P63010;P63010-2	P63010;Q10567;A0A087WU93;A0A087WYD1;A0A087WZQ6;A0A087X253;C9J1E7;P63010-2;P63010-3;Q10567-2;Q10567-3;Q10567-4	AP2B1-2_HUMAN;AP2B1_HUMAN	AP2B1	AP-2 complex subunit beta	6720750	6885640	6597970	6189480	5748020	5953250
Q15257;Q15257-2	Q15257;A6PVN5;A6PVN6;A6PVN7;A6PVN8;A6PVN9;C9IZ76;F6WIT2;Q15257-2;Q15257-3;Q5T948;Q5T949	PTPA-2_HUMAN;PTPA_HUMAN	PTPA	Serine/threonine-protein phosphatase 2A activator	6292760	6419960	5624910	5812620	6388260	6643440
O15078;O15078-2	O15078;J3KNF5;O15078-2	CE290-2_HUMAN;CE290_HUMAN	CEP290	Centrosomal protein of 290 kDa	7892560	6705460	6714210	6820410	5197280	6589580
P17655	P17655	CAN2_HUMAN	CAPN2	Calpain-2 catalytic subunit	6245690	6261440	7566760	5942600	4776910	6238560
P42166	P42166;G5E972;H0YJH7;P42167;P42167-2;P42167-3	LAP2A_HUMAN	TMPO	Lamina-associated polypeptide 2, isoform alpha	5080200	5097720	4938350	5873100	7313180	5466110
P62263	P62263;A0A2R8Y811;E5RH77	RS14_HUMAN	RPS14	40S ribosomal protein S14	4960660	5202420	5146310	6658080	7654220	6057840
Q9UJZ1	Q9UJZ1;A0A087WYB4	STML2_HUMAN	STOML2	Stomatin-like protein 2, mitochondrial	5964600	6257440	5800410	7443650	7383850	6607820
O95747	O95747;Q9UEW8;C9JIG9;Q9UEW8-2	OXSR1_HUMAN	OXSR1	Serine/threonine-protein kinase OSR1	5930060	5746350	6414310	6113990	6681350	5684240
Q9Y265	Q9Y265;H7C4G5	RUVB1_HUMAN	RUVBL1	RuvB-like 1	6662320	6311480	5739690	6036470	5884910	6226220
P26583	P26583;D6R9A6	HMGB2_HUMAN	HMGB2	High mobility group protein B2	5359440	5747740	6110520	5588160	7567460	5151330
Q00325-2	F8VVM2;F8VWQ0;Q00325-2	MPCP-2_HUMAN	SLC25A3	Isoform of Q00325, Isoform B of Phosphate carrier protein, mitochondrial	3263780	4503740	5480290	5027210	7867870	3479040
P62993	P62993;P62993-2	GRB2_HUMAN	GRB2	Growth factor receptor-bound protein 2	6285590	6181550	5896390	5720270	6944590	6704980
Q15843	Q15843;S4R3E9	NEDD8_HUMAN	NEDD8	NEDD8	5435420	5064060	6746450	6694930	7297130	6490080
A8MWD9;P62308	A8MWD9;P62308;C9JVQ0;F5H013;Q49AN9	RUXGL_HUMAN;RUXG_HUMAN	SNRPG;SNRPGP15	Putative small nuclear ribonucleoprotein G-like protein 15	7318850	5934410	5384190	5170020	5478650	5625830
Q99426	Q99426;A0A494C0X0;K7EK42;K7EP07;Q99426-2	TBCB_HUMAN	TBCB	Tubulin-folding cofactor B	6225670	6604670	6533430	6498700	5764520	6804000
P53597	P53597	SUCA_HUMAN	SUCLG1	Succinate--CoA ligase [ADP/GDP-forming] subunit alpha, mitochondrial	5671710	5506560	5831500	5534690	5241350	5848770
P46778	P46778;G3V1B3;M0R181;M0R3I5	RL21_HUMAN	RPL21	60S ribosomal protein L21	5564550	6093440	4899410	6764540	6803520	6101950
P21912	P21912	SDHB_HUMAN	SDHB	Succinate dehydrogenase [ubiquinone] iron-sulfur subunit, mitochondrial	5610190	5293540	5530370	5808410	6179640	6495140
P20962	P20962;F5GXR3;F5H7R9	PTMS_HUMAN	PTMS	Parathymosin	3544520	4424780	3740660	11116300	6047970	3550780
Q15393	Q15393	SF3B3_HUMAN	SF3B3	Splicing factor 3B subunit 3	6189650	6479280	6171120	6106160	5767060	5906210
P37108	P37108;H0YLA2	SRP14_HUMAN	SRP14	Signal recognition particle 14 kDa protein	5456950	5617160	5237430	6128180	6975390	5738880
P17980	P17980;E9PKD5;E9PLG2;E9PMD8;E9PN50;R4GNH3	PRS6A_HUMAN	PSMC3	26S proteasome regulatory subunit 6A	6178420	6186230	5793050	6541660	6563280	6200890
Q9UJ70;Q9UJ70-2	Q9UJ70;C9JEV6;H0YE82;H0YEB7;H7C1L7;H7C3G9;Q9UJ70-2	NAGK-2_HUMAN;NAGK_HUMAN	NAGK	N-acetyl-D-glucosamine kinase	5559780	6049560	6613960	5951220	4855330	6324530
P08559;P08559-2;P08559-4	P08559;P29803;P08559-2;P08559-3;P08559-4;Q5JPU3	ODPA-2_HUMAN;ODPA-4_HUMAN;ODPA_HUMAN	PDHA1	Pyruvate dehydrogenase E1 component subunit alpha, somatic form, mitochondrial	6174770	5845540	5918920	5728430	5415210	6462320
Q9NZL9	Q9NZL9;E5RJR3;Q9NZL9-2;Q9NZL9-3;Q9NZL9-4;Q9NZL9-5	MAT2B_HUMAN	MAT2B	Methionine adenosyltransferase 2 subunit beta	6713380	6538050	5398740	6369940	4551990	6472100
Q9UKG1	Q9UKG1	DP13A_HUMAN	APPL1	DCC-interacting protein 13-alpha	6021950	5497580	5282790	5888830	7186590	7049870
Q02338	Q02338;C9K0G7;E9PCG9;H7C2W1	BDH_HUMAN	BDH1	D-beta-hydroxybutyrate dehydrogenase, mitochondrial	5192650	6679840	5435150	5970840	8227300	4678840
Q9BUJ2;Q9BUJ2-2	Q9BUJ2;A0A0A0MRA5;B7Z4B8;M0QYZ0;M0R3F1;Q9BUJ2-2;Q9BUJ2-3;Q9BUJ2-4	HNRL1-2_HUMAN;HNRL1_HUMAN	HNRNPUL1	Heterogeneous nuclear ribonucleoprotein U-like protein 1	6080950	5801240	6116800	6703370	6719170	6396690
P61289;P61289-2	P61289;A0A087WTV2;B3KQ25;K7ESG5;K9J957;P61289-2;P61289-3	PSME3-2_HUMAN;PSME3_HUMAN	PSME3	Proteasome activator complex subunit 3	6423040	6362310	6311410	6700150	4599450	6036940
Q02750	A0A1B0GUL7;P36507;Q02750;G5E9C7;H3BRW9;Q02750-2	MP2K1_HUMAN	MAP2K1	Dual specificity mitogen-activated protein kinase kinase 1	6565820	6231760	5999300	5982000	5925450	6261440
Q9UKV3	Q9UKV3;E7EQT4;G3V3B0;Q9UKV3-2;Q9UKV3-3;Q9UKV3-5;S4R3H4	ACINU_HUMAN	ACIN1	Apoptotic chromatin condensation inducer in the nucleus	6471610	6522250	5676630	6121250	6798000	6334640
P01889	P01891;A0A0G2JPD3;A0A140T8W8;A0A140T8Y4;A0A1W2PPF8;A0A1W2PPR8;A0A1W2PR61;F6U0H7;P01889;P10316;P13746;P13746-2;P18462;P30450;P30453;P30456;P30457;P30462;P30475;P30480;P30486;Q29836;Q31610;Q95365	1B07_HUMAN	HLA-B	Isoform of Q31612, HLA class I histocompatibility antigen, B-7 alpha chain	8541390	3970170	3011010	7471760	5941120	5908760
P62195;P62195-2	P62195;J3KRP2;J3QLH6;J3QQM1;J3QRR3;J3QSA9;P62195-2	PRS8-2_HUMAN;PRS8_HUMAN	PSMC5	26S proteasome regulatory subunit 8	5949000	5605930	5306230	6041690	5420990	5855380
Q9Y3I0	Q9Y3I0	RTCB_HUMAN	RTCB	tRNA-splicing ligase RtcB homolog	5615730	5461030	5540850	5700490	5410890	5743410
Q96HE7	Q96HE7;G3V3E6;G3V5B3	ERO1A_HUMAN	ERO1A	ERO1-like protein alpha	5700680	4955370	5450490	7020790	7220780	5833420
P80303;P80303-2	P80303;A0A087WSV8;E9PKG6;H0YEG8;P80303-2;Q2L696	NUCB2-2_HUMAN;NUCB2_HUMAN	NUCB2	Nucleobindin-2	5885330	6474070	6124210	5564150	9386740	5624580
Q96C19	Q96C19	EFHD2_HUMAN	EFHD2	EF-hand domain-containing protein D2	6982630	5200240	6125970	6051350	4952730	6003640
O00303	O00303	EIF3F_HUMAN	EIF3F	Eukaryotic translation initiation factor 3 subunit F	6398400	6292710	5418560	6398780	6008380	6110130
P61201;P61201-2	P61201;B4DIH5;P61201-2	CSN2-2_HUMAN;CSN2_HUMAN	COPS2	COP9 signalosome complex subunit 2	6474920	6089120	5762720	5811560	5916830	6326930
P07384	P07384;E9PIA9;E9PJA6;E9PJJ3;E9PLC9;E9PLX0;E9PMC6;E9PQB3;E9PRM1;E9PSA6	CAN1_HUMAN	CAPN1	Calpain-1 catalytic subunit	6073050	6155640	6816400	5688510	5671410	5356380
P22087	P22087;M0QXL5;M0R0P1;M0R1H0;M0R299;M0R2B0;M0R2Q4;M0R2U2	FBRL_HUMAN	FBL	rRNA 2'-O-methyltransferase fibrillarin	5438130	5755400	6082090	6987610	6382460	6705470
Q9BS26	Q9BS26	ERP44_HUMAN	ERP44	Endoplasmic reticulum resident protein 44	5861680	5624350	5876430	6822230	6158100	5725580
P56381;Q5VTU8	P56381;Q5VTU8	AT5EL_HUMAN;ATP5E_HUMAN	ATP5F1E;ATP5F1EP2	ATP synthase subunit epsilon, mitochondrial	4558720	4001250	4747370	5173220	4971240	5600330
P62316	P62316;K7ERG4	SMD2_HUMAN	SNRPD2	Small nuclear ribonucleoprotein Sm D2	5476590	5462260	5595500	5840440	7279440	5891270
P31942;P31942-2	P31942;P31942-2;P31942-3;P31942-4	HNRH3-2_HUMAN;HNRH3_HUMAN	HNRNPH3	Heterogeneous nuclear ribonucleoprotein H3	6063390	5740800	5360580	5677530	6047900	6460580
P49748;P49748-3	P49748;P49748-2;P49748-3	ACADV-3_HUMAN;ACADV_HUMAN	ACADVL	Very long-chain specific acyl-CoA dehydrogenase, mitochondrial	4803800	4444100	6190500	5392650	5922590	5059750
O60711;O60711-2	O60711;B7Z5P7;O60711-2	LPXN-2_HUMAN;LPXN_HUMAN	LPXN	Leupaxin	6024230	5662260	6028640	7090470	6730400	6436120
P50914	P50914;E7EPB3	RL14_HUMAN	RPL14	60S ribosomal protein L14	3777320	3589080	3091640	7003730	7549970	5915630
P49458	P49458	SRP09_HUMAN	SRP9	Signal recognition particle 9 kDa protein	6052670	6948560	5302350	6103260	6077060	5915660
Q9Y6N5	Q9Y6N5;H3BNP9	SQOR_HUMAN	SQOR	Sulfide:quinone oxidoreductase, mitochondrial	3971900	5324790	6933090	5840720	6121540	5324180
O94925-3	O94925;H7BZD1;O94925-3	GLSK-3_HUMAN	GLS	Isoform of O94925, Isoform 3 of Glutaminase kidney isoform, mitochondrial	5861810	6403200	6283980	6398370	4311830	5715390
Q96C86	Q96C86;A0A3B3ITF0	DCPS_HUMAN	DCPS	m7GpppX diphosphatase	5813770	6163500	5582910	5008220	5426520	6412560
Q15435	Q15435;H7C003;H7C3Q5;Q15435-2	PP1R7_HUMAN	PPP1R7	Protein phosphatase 1 regulatory subunit 7	6200530	5777610	5842310	5623500	6209760	6526900
Q15052	Q15052;Q15052-2	ARHG6_HUMAN	ARHGEF6	Rho guanine nucleotide exchange factor 6	5831890	6079020	6167030	5947620	5605030	5816320
P50238	H3BRQ4;K4DIB9;P50238	CRIP1_HUMAN	CRIP1	Cysteine-rich protein 1	5902100	5429730	3931540	5228020	5126760	6338050
Q9UQ35	Q9UQ35	SRRM2_HUMAN	SRRM2	Serine/arginine repetitive matrix protein 2	5915560	5658790	5311270	6096570	7050870	6668150
Q6IBS0	H0Y858;Q12792;Q6IBS0;D6RG15;F8VS81;Q12792-3;Q12792-4	TWF2_HUMAN	TWF2	Twinfilin-2	5666040	5584010	6214530	5316790	4508000	5095700
Q9Y4H4	Q9Y4H4;E9PIP3	GPSM3_HUMAN	GPSM3	G-protein-signaling modulator 3	5785560	6523000	5968630	7492860	7555540	5937110
Q15046;Q15046-2	Q15046;H3BVA8;Q15046-2	SYK-2_HUMAN;SYK_HUMAN	KARS	Lysine--tRNA ligase	4923790	5443870	6319370	5302810	5473230	5217590
Q16555;Q16555-2	Q16555;A0A1C7CYX9;Q16555-2	DPYL2-2_HUMAN;DPYL2_HUMAN	DPYSL2	Dihydropyrimidinase-related protein 2	4701620	4539180	5149260	5280430	9367530	4711560
P38919	P38919;I3L3H2	IF4A3_HUMAN	EIF4A3	Eukaryotic initiation factor 4A-III	4884630	5124770	5478970	5897210	5626970	5617360
P09326	P09326;A0A087X1S7;P09326-2	CD48_HUMAN	CD48	CD48 antigen	6367080	5197760	6126210	4467480	4675400	6351510
Q99623	Q99623;F5GWA7;F5GY37;F5H3X6;J3KPX7;Q99623-2	PHB2_HUMAN	PHB2	Prohibitin-2	4849560	4535650	5775810	6753950	6325940	6139260
P36551	H0YA22;P36551	HEM6_HUMAN	CPOX	Oxygen-dependent coproporphyrinogen-III oxidase, mitochondrial	5068460	4436480	5149970	6728160	4829600	5253300
Q04837	Q04837;A0A0G2JLD8;C9K0U8;E7EUY5	SSBP_HUMAN	SSBP1	Single-stranded DNA-binding protein, mitochondrial	5281540	5416010	4948500	5088820	4615740	5810530
Q96EP5;Q96EP5-2	Q96EP5;K7EK33;K7EQ02;K7EQ55;Q96EP5-2	DAZP1-2_HUMAN;DAZP1_HUMAN	DAZAP1	DAZ-associated protein 1	5648640	5689550	5173370	5486800	5845620	5514060
P49023	P49023;A0A1B0GTU4;A0A1B0GU60;F5GZ78;F5H836;P49023-2;P49023-3	PAXI_HUMAN	PXN	Paxillin	6160180	6196580	5908380	5924860	5467740	6354080
Q15056-2	Q15056;Q15056-2	IF4H-2_HUMAN	EIF4H	Isoform of Q15056, Isoform Short of Eukaryotic translation initiation factor 4H	5378890	5398480	5114640	5326920	5420730	5224200
Q8WW12	Q8WW12;Q8WW12-3	PCNP_HUMAN	PCNP	PEST proteolytic signal-containing nuclear protein	5536180	6012380	5040040	5429990	5260840	5667620
P49207	P49207	RL34_HUMAN	RPL34	60S ribosomal protein L34	4900320	4613240	3396780	5520040	5844620	4387180
P46940	P46940;H0YLE8	IQGA1_HUMAN	IQGAP1	Ras GTPase-activating-like protein IQGAP1	4422870	4507470	6779030	5156970	7377220	4426860
Q99613;Q99613-2	B5ME19;Q99613;Q99613-2	EIF3C-2_HUMAN;EIF3C_HUMAN	EIF3C	Eukaryotic translation initiation factor 3 subunit C	6063500	6141940	5607050	5873060	5306290	5248540
P46926	P46926;Q8TDQ7;D6R917;D6R9P4;D6RAY7;D6RB13;P46926-2;Q8TDQ7-2;Q8TDQ7-3	GNPI1_HUMAN	GNPDA1	Glucosamine-6-phosphate isomerase 1	5696990	6743350	5609480	4991540	4134510	5988320
P43490	P43490;A0A0C4DFS8	NAMPT_HUMAN	NAMPT	Nicotinamide phosphoribosyltransferase	4507550	3929500	4151040	5908290	5419460	5126620
O60888;O60888-2;O60888-3	O60888;C9IZG4;O60888-2;O60888-3	CUTA-2_HUMAN;CUTA-3_HUMAN;CUTA_HUMAN	CUTA	Protein CutA	5190830	5074330	4966720	5974210	6556950	6176020
Q07021	Q07021;I3L3B0;I3L3Q7	C1QBP_HUMAN	C1QBP	Complement component 1 Q subcomponent-binding protein, mitochondrial	5504070	5860510	6002670	7253280	6996450	6669240
P08621	P08621;P08621-4	RU17_HUMAN	SNRNP70	U1 small nuclear ribonucleoprotein 70 kDa	4271310	5334820	5958420	5402140	6523830	5014900
Q8NFU3	Q8NFU3;Q8NFU3-2;Q8NFU3-4;R4GNF9	TSTD1_HUMAN	TSTD1	Thiosulfate:glutathione sulfurtransferase	4526200	4541170	5119540	5129480	6034650	6873830
P07108;P07108-2;P07108-3;P07108-4;P07108-5	P07108;A0A0A0MTI5;B8ZWD1;P07108-2;P07108-3;P07108-4;P07108-5	ACBP-2_HUMAN;ACBP-3_HUMAN;ACBP-4_HUMAN;ACBP-5_HUMAN;ACBP_HUMAN	DBI	Acyl-CoA-binding protein	5695230	5780290	5761660	5924930	6324030	5619690
Q969H8	Q969H8	MYDGF_HUMAN	MYDGF	Myeloid-derived growth factor	5497790	4772510	5087290	6237650	5894440	5540020
P59190;P59190-2	P59190;A0A2R8Y7G7;A0A2R8YFB8;G3V196;G3V562;J3QSF4;P59190-2	RAB15-2_HUMAN;RAB15_HUMAN	RAB15	Ras-related protein Rab-15		5702010	6142810	6334390	6647430	5818700
Q9NUQ9	Q9NUQ9;Q9NUQ9-2	FA49B_HUMAN	FAM49B	Protein FAM49B	5621320	6086730	5638140	5241160	5798220	5585820
P46782	P46782;M0R0F0;M0R0R2	RS5_HUMAN	RPS5	40S ribosomal protein S5	5025420	5171840	5809090	6527430	6354780	5476400
Q8IUF8;Q8IUF8-4	Q8IUF8;Q8IUF8-3;Q8IUF8-4	RIOX2-4_HUMAN;RIOX2_HUMAN	RIOX2	Ribosomal oxygenase 2	4929720	4005260	4645980	5810030	5607690	4754980
Q13242	Q13242	SRSF9_HUMAN	SRSF9	Serine/arginine-rich splicing factor 9	5354820	5202530	5052520	5557370	7274030	5779960
P18621;P18621-3	P18621;A0A087WWH0;A0A087WXM6;A0A087WY81;J3KRB3;J3KRX5;J3KSJ0;J3QQT2;J3QS96;P18621-3;A0A0A6YYL6	RL17-3_HUMAN;RL17_HUMAN	RPL17	60S ribosomal protein L17	4688070	4896540	4123000	5801470	6492740	5000590
P48147	P48147	PPCE_HUMAN	PREP	Prolyl endopeptidase	5359360	5401050	5533390	5113930	5561870	5390420
Q7KZF4	Q7KZF4	SND1_HUMAN	SND1	Staphylococcal nuclease domain-containing protein 1	4716610	4781640	6000270	5606320	5970720	5287880
O75694	O75694;E9PF10;O75694-2	NU155_HUMAN	NUP155	Nuclear pore complex protein Nup155	5624380	5959680	5667570	5678370	5382330	4923380
P53602	P53602;H3BP35	MVD1_HUMAN	MVD	Diphosphomevalonate decarboxylase	5374470	5434290	5344930	4972760	5381400	5005550
Q92839	Q92839;G3V1S7;M0QXH4;M0R2V0	HYAS1_HUMAN	HAS1	Hyaluronan synthase 1	6864770	6142160		6021120	7283090	7305930
Q969Q0	P83881;Q969Q0;H0Y3V9;H0Y5B4;H7BY91;J3KQN4;H7BZ11	RL36L_HUMAN	RPL36AL	60S ribosomal protein L36a-like	5192190	4859040	3700340	5903780	5631420	4690300
P48444	P48444;B0YIW6;Q6P1Q5	COPD_HUMAN	ARCN1	Coatomer subunit delta	5278660	4940740	5584030	5195210	4761760	5214400
Q96K21;Q96K21-2;Q96K21-4	Q96K21;H3BN64;H3BRF9;H3BRM1;H3BUW6;Q96K21-2;Q96K21-3;Q96K21-4	ANCHR-2_HUMAN;ANCHR-4_HUMAN;ANCHR_HUMAN	ZFYVE19	Abscission/NoCut checkpoint regulator	5421580	4937520	4359100	5061340	7208470	4987970
Q8WUM4	Q8WUM4;A0A3B3IT07;C9IZF9;Q8WUM4-2;Q8WUM4-3	PDC6I_HUMAN	PDCD6IP	Programmed cell death 6-interacting protein	5549500	5318600	5240050	5060890	5601190	6238340
Q9UKM9	Q9UKM9;Q5QPL9;Q5QPM0;Q5QPM1;Q9UKM9-2	RALY_HUMAN	RALY	RNA-binding protein Raly	5988550	5485850	6631210	6080470	6027960	5943640
Q08945	Q08945	SSRP1_HUMAN	SSRP1	FACT complex subunit SSRP1	5780160	5723210	5170320	5347960	5135650	5380830
P56192	P56192;P56192-2	SYMC_HUMAN	MARS	Methionine--tRNA ligase, cytoplasmic	4995560	5563620	5836640	5388260	5457930	5004060
Q9UBC2;Q9UBC2-2;Q9UBC2-3	Q9UBC2;M0R165;M0R2S2;Q9UBC2-2;Q9UBC2-3;Q9UBC2-4	EP15R-2_HUMAN;EP15R-3_HUMAN;EP15R_HUMAN	EPS15L1	Epidermal growth factor receptor substrate 15-like 1	5442900	5514890	5504360	5468460	5684530	5774720
P09012	P09012;M0QXK2;M0QZG7;M0R221;M0R268;M0R2B8	SNRPA_HUMAN	SNRPA	U1 small nuclear ribonucleoprotein A	5538240	5796400	5783910	5929370	6925010	5658120
O94874	O94874;Q92845;O94874-2;Q92845-2;Q92845-3;Q92845-4	UFL1_HUMAN	UFL1	E3 UFM1-protein ligase 1	4701110	5392510	5461530	4967570	5734930	4546580
Q96F07-2	Q96F07;E7EVJ5;E7EW33;H7C229;Q96F07-2	CYFP2-2_HUMAN	CYFIP2	Isoform of Q96F07, Isoform 2 of Cytoplasmic FMR1-interacting protein 2	5420610	5614650	5886140	5032480	5518830	4690410
O00487	O00487	PSDE_HUMAN	PSMD14	26S proteasome non-ATPase regulatory subunit 14	5438790	5514420	5210660	5608260	5460730	5446580
P09496-2	P09496;F8WF69;P09496-2;P09496-3;P09496-4	CLCA-2_HUMAN	CLTA	Isoform of P09496, Isoform Non-brain of Clathrin light chain A	6209020	5249820	5618100	5676480	6338360	5785900
A6NCE7;Q9GZQ8	A6NCE7;Q9GZQ8;H3BTL1	MLP3B_HUMAN;MP3B2_HUMAN	MAP1LC3B;MAP1LC3B2	Microtubule-associated proteins 1A/1B light chain 3 beta 2	7384580		5541110	6328490	6247840	7690240
Q9Y617	Q9Y617;Q9Y617-2	SERC_HUMAN	PSAT1	Phosphoserine aminotransferase	6357920	5093870	6999540	3652860	4852610	5043880
Q01813	Q01813;B1APP6;H0Y3Y3;Q01813-2	PFKAP_HUMAN	PFKP	ATP-dependent 6-phosphofructokinase, platelet type	5015170	4514380	5803780	3638280	6766170	5651500
Q15637-6	H7C0N4;H7C561;Q15637-6	SF01-6_HUMAN	SF1	Isoform of Q15637, Isoform 6 of Splicing factor 1	4756020	4738100	4892340	4844760	5300710	5268730
P17844	P17844;J3KRX8;J3KTA4;J3KTQ4;J3QR02;J3QRQ7;P17844-2;X6RLV5	DDX5_HUMAN	DDX5	Probable ATP-dependent RNA helicase DDX5	4887780	5210390	5877130	6476700	4311450	5902960
Q8WVY7	Q8WVY7	UBCP1_HUMAN	UBLCP1	Ubiquitin-like domain-containing CTD phosphatase 1	5279170	5287310	5853120	4752960	3806600	5739180
P16930	P16930;P16930-2	FAAA_HUMAN	FAH	Fumarylacetoacetase	5168100	4711960	4469740	5170830	6394500	5991040
P67809	P16989;P67809;Q9Y2T7;A0A0D9SEI8;H0Y449;P16989-2;P16989-3	YBOX1_HUMAN	YBX1	Nuclease-sensitive element-binding protein 1	4613100	5553810	5377980	6630590	5678530	5631810
Q7RTV0	Q7RTV0	PHF5A_HUMAN	PHF5A	PHD finger-like domain-containing protein 5A	5545280	5230990	4954550	5094040	4848240	4782070
P22234	P22234;D6RF62;E9PBS1;P22234-2	PUR6_HUMAN	PAICS	Multifunctional protein ADE2	5039470	5563920	4099970	5270050	6928820	5194500
O43399;O43399-5;O43399-7	O43399;A0A087WYR3;O43399-5;O43399-7	TPD54-5_HUMAN;TPD54-7_HUMAN;TPD54_HUMAN	TPD52L2	Tumor protein D54	5326230	5219350	5015920	4852420	5708720	5687840
P18085	P18085;C9JAK5;U3KQF2	ARF4_HUMAN	ARF4	ADP-ribosylation factor 4	4931410	4451210	5305780	5839970	5444490	6028740
P28482	P28482;P28482-2	MK01_HUMAN	MAPK1	Mitogen-activated protein kinase 1	5200120	5322330	5807400	4925120	4820020	5452230
P22307	P22307;E9PLD1;P22307-3;P22307-4;P22307-7;P22307-8	NLTP_HUMAN	SCP2	Non-specific lipid-transfer protein	6010910	5491950	5146250	5448850	5777070	5113620
O76003	O76003	GLRX3_HUMAN	GLRX3	Glutaredoxin-3	5508680	5543750	4848360	5804030	5218050	5507480
P28331;P28331-2	P28331;C9JPQ5;P28331-2;P28331-4	NDUS1-2_HUMAN;NDUS1_HUMAN	NDUFS1	NADH-ubiquinone oxidoreductase 75 kDa subunit, mitochondrial	4962180	5553310	4855100	5113150	5719540	6029540
P38606;P38606-2	P38606;P38606-2	VATA-2_HUMAN;VATA_HUMAN	ATP6V1A	V-type proton ATPase catalytic subunit A	5202030	5456400	5137790	4978110	5002720	5409870
P50570	P50570;Q9UQ16;E5RHK8;P50570-2;P50570-3;P50570-4;P50570-5;Q9UQ16-2;Q9UQ16-3;Q9UQ16-4	DYN2_HUMAN	DNM2	Dynamin-2	5124350	4864420	5267620	4853670	4787500	5083450
O75821	O75821;K7EL20;K7ENA8;K7EP16;K7ER90	EIF3G_HUMAN	EIF3G	Eukaryotic translation initiation factor 3 subunit G	5248640	5375250	5394500	5463130	5405040	5062750
Q8IXM2	Q8IXM2;F8W038;F8W1H0;Q8IXM2-3;H0YIS7	BAP18_HUMAN	BAP18	Chromatin complexes subunit BAP18	4812580	4792500	4918700	5000510	4330710	5405120
P10515	P10515;E9PEJ4;H0YDD4	ODP2_HUMAN	DLAT	Dihydrolipoyllysine-residue acetyltransferase component of pyruvate dehydrogenase complex, mitochondrial	5285450	5200740	4947400	4852870	4771510	5579660
P39748	P39748;I3L3E9;P39748-2	FEN1_HUMAN	FEN1	Flap endonuclease 1	4505030	4879840	5115810	5386670	6870540	4990370
O60610;O60610-2;O60610-3	O60610;A0A0G2JH68;A0A140T8Z0;A0A2R8Y5N1;H9KV28;O60610-2;O60610-3	DIAP1-2_HUMAN;DIAP1-3_HUMAN;DIAP1_HUMAN	DIAPH1	Protein diaphanous homolog 1	4190620	3124940	3678410	4155360	5797730	4585010
P09668	P09668;A0A087X0D5	CATH_HUMAN	CTSH	Pro-cathepsin H	7013950	2620960	6093250	7397060	2735060	4809810
P47755	P47755;A0A0D9SET8;C9JUG7;F8W9N7;P47755-2	CAZA2_HUMAN	CAPZA2	F-actin-capping protein subunit alpha-2	5034420	5560670	5239950	4857350	5001080	5269580
Q16543	Q16543;K7EL68	CDC37_HUMAN	CDC37	Hsp90 co-chaperone Cdc37	5418020	5261920	5273800	5440180	4796870	4800980
P15927;P15927-2;P15927-3	P15927;P15927-2;P15927-3;Q5TEJ7	RFA2-2_HUMAN;RFA2-3_HUMAN;RFA2_HUMAN	RPA2	Replication protein A 32 kDa subunit	5020810	5580020	4733920	5302260	5152540	5745420
O60884	O60884	DNJA2_HUMAN	DNAJA2	DnaJ homolog subfamily A member 2	5331190	4971320	5252700	5050650	5169820	5243750
P00813	P00813;F5GWI4;F5GXW0	ADA_HUMAN	ADA	Adenosine deaminase	5898540	5799770	4693130	5412800	5985020	4344680
Q12874	Q12874	SF3A3_HUMAN	SF3A3	Splicing factor 3A subunit 3	5384630	5498470	5029760	5327210	5529780	5478320
Q01658	Q01658	NC2B_HUMAN	DR1	Protein Dr1	5485210	4816700	4572840	4953140	5581220	6233150
Q9Y383	Q9Y383;A0A0A6YYJ8;Q96HJ9-2;Q9Y383-2;Q9Y383-3	LC7L2_HUMAN	LUC7L2	Putative RNA-binding protein Luc7-like 2	4172200	5602930	5283430	5564060	5463320	5428950
Q9UKY7	Q9UKY7;H0Y8K3;Q9UKY7-2	CDV3_HUMAN	CDV3	Protein CDV3 homolog	4585660	4784100	4995720	4980710	4638300	4698970
P54920	P54920;M0R0I4;M0R0Y2;M0R213;M0R2M1	SNAA_HUMAN	NAPA	Alpha-soluble NSF attachment protein	5070480	5724060	5396940	5349830	4689720	5156690
Q13148	Q13148;A0A087WX29;A0A087WYY0;A0A087X260;A0A0A0MSV7;A0A0A0N0M3;A0A1W2PNU8;B1AKP7;G3V162;K7EJ99;K7EJM5;K7EN94	TADBP_HUMAN	TARDBP	TAR DNA-binding protein 43	5069730	5430840	4915890	5162260	5319860	5610240
Q13303-2	Q13303;Q13303-2;Q13303-3;Q13303-4;Q13303-5;Q5TG80	KCAB2-2_HUMAN	KCNAB2	Isoform of Q13303, Isoform 2 of Voltage-gated potassium channel subunit beta-2	4175360	4401260	5194870	5059440	4996290	5211110
P27694	P27694;I3L4R8	RFA1_HUMAN	RPA1	Replication protein A 70 kDa DNA-binding subunit	4881500	5107750	4838660	4913290	4827010	5612670
Q08170	Q08170	SRSF4_HUMAN	SRSF4	Serine/arginine-rich splicing factor 4	5279390	5046690	4941890	5589400	5744300	4969630
Q9Y6W5	Q9Y6W5;Q9Y6W5-2	WASF2_HUMAN	WASF2	Wiskott-Aldrich syndrome protein family member 2	5654400	4977660	5132750	4643140	5223840	5180590
P46779	P46779;H0YKD8;H0YLP6;H0YMF4;P46779-2;P46779-3;P46779-4;P46779-5	RL28_HUMAN	RPL28	60S ribosomal protein L28	5242740	4784980	3967080	5355760	5585900	4769940
P42574	P42574	CASP3_HUMAN	CASP3	Caspase-3	5016500	5713890	4610000	5907490	5203470	4873640
Q6NUK1	Q6NUK1;Q6NUK1-2	SCMC1_HUMAN	SLC25A24	Calcium-binding mitochondrial carrier protein SCaMC-1	4592780	4572190	6707980	3890900	4784100	3974850
Q13813	Q13813;A0A0D9SF54;A0A0D9SGF6;Q13813-2;Q13813-3	SPTN1_HUMAN	SPTAN1	Spectrin alpha chain, non-erythrocytic 1	5600680	5780320	4939570	4482030	5506780	4952640
A6NNF4;A6NNF4-3	A6NNF4;A0A0A0MR41;A6NNF4-3	ZN726-3_HUMAN;ZN726_HUMAN	ZNF726	Zinc finger protein 726	5038430	5417120	5146590	5227340	3790970	3934540
Q9H4A4	Q9H4A4;A6NKB8	AMPB_HUMAN	RNPEP	Aminopeptidase B	4614560	4702290	5945760	5389550	5439020	4989020
Q92973;Q92973-2	Q92973;Q92973-2;Q92973-3	TNPO1-2_HUMAN;TNPO1_HUMAN	TNPO1	Transportin-1	5041460	5472350	5480190	5492640	4900910	5131800
Q9UHB6;Q9UHB6-2	Q9UHB6;F8VQE1;F8VRN8;Q9UHB6-2;Q9UHB6-4;Q9UHB6-5	LIMA1-2_HUMAN;LIMA1_HUMAN	LIMA1	LIM domain and actin-binding protein 1	3435910	4963950	3680890	6658840	4097060	3369100
P12955	P12955;A0A494C165;A0A494C194;K7ES25;P12955-2;P12955-3	PEPD_HUMAN	PEPD	Xaa-Pro dipeptidase	5951090	5831340	5746130	4847050	3425650	4305090
P58546	P58546;C9JL85	MTPN_HUMAN	MTPN	Myotrophin	4585610	5158390	5559770	5500030	5470790	5356960
Q14566	Q14566	MCM6_HUMAN	MCM6	DNA replication licensing factor MCM6	4828370	5795110	3714510	6050580	5294820	4893330
P20810-10;P20810-5;P20810-6;P20810-7;P20810-9	A0A0C4DGB5;D6RBR1;D6RGF7;E7EN75;E9PSG1;F8W7E0;H0Y944;H0YA91;P20810-10;P20810-5;P20810-6;P20810-7;P20810-9	ICAL-10_HUMAN;ICAL-5_HUMAN;ICAL-6_HUMAN;ICAL-7_HUMAN;ICAL-9_HUMAN	CAST	Isoform of P20810, Isoform 10 of Calpastatin	5064560	5162010	5259770	4904120	4969350	4617510
Q14152	Q14152;Q14152-2	EIF3A_HUMAN	EIF3A	Eukaryotic translation initiation factor 3 subunit A	4966390	5091710	5019850	4899000	4722440	4409130
Q14761	Q14761	PTCA_HUMAN	PTPRCAP	Protein tyrosine phosphatase receptor type C-associated protein	4218740	4420120	5524170	5810700	3116260	3953160
Q13043	Q13043;A0A087WVN8;Q13043-2	STK4_HUMAN	STK4	Serine/threonine-protein kinase 4	5409840	5249110	5136570	5123230	4916280	5519850
Q9NZ08	Q9NZ08;Q9NZ08-2	ERAP1_HUMAN	ERAP1	Endoplasmic reticulum aminopeptidase 1	4819380	5007520	6517860	4799110	5618360	2734760
P30740	P30740	ILEU_HUMAN	SERPINB1	Leukocyte elastase inhibitor	4452560	4677610	5277300	4391620	4869460	5254170
Q92598;Q92598-2	Q92598;A0A0A0MSM0;Q5TBM3;Q92598-2;Q92598-3;Q92598-4	HS105-2_HUMAN;HS105_HUMAN	HSPH1	Heat shock protein 105 kDa	4937020	4483240	4167000	6249180	4015270	5306210
O75494;O75494-2;O75494-3;O75494-4;O75494-5;O75494-6	O75494;O75494-2;O75494-3;O75494-4;O75494-5;O75494-6;Q5JRI1;Q6IQ42;R4GMP8	SRS10-2_HUMAN;SRS10-3_HUMAN;SRS10-4_HUMAN;SRS10-5_HUMAN;SRS10-6_HUMAN;SRS10_HUMAN	SRSF10	Serine/arginine-rich splicing factor 10	4773550	5333060	4894220	5169040	5128300	5380850
Q9Y678	Q9Y678	COPG1_HUMAN	COPG1	Coatomer subunit gamma-1	4952340	5038260	5446110	5162190	4456280	4794150
P26196	P26196	DDX6_HUMAN	DDX6	Probable ATP-dependent RNA helicase DDX6	4294810	4913900	5259270	5228980	4850900	4709320
Q13347	Q13347	EIF3I_HUMAN	EIF3I	Eukaryotic translation initiation factor 3 subunit I	5124750	5354960	4923270	5524850	5017390	5211690
P54725;P54725-3	P54725;K7EQ16;P54725-3	RD23A-3_HUMAN;RD23A_HUMAN	RAD23A	UV excision repair protein RAD23 homolog A	4563970	4772100	4811540	4949650	5782150	5052970
P41252	P41252;A0A0A0MSX9;J3KR24;Q5TCD1	SYIC_HUMAN	IARS	Isoleucine--tRNA ligase, cytoplasmic	4888750	5112490	5373700	4861720	5187640	4599520
O60828;O60828-2	O60828;H7C053;O60828-2;O60828-4;O60828-5	PQBP1-2_HUMAN;PQBP1_HUMAN	PQBP1	Polyglutamine-binding protein 1	5537450	5287620	4479390	4735970	4280910	5050340
P35998	P35998;P35998-2	PRS7_HUMAN	PSMC2	26S proteasome regulatory subunit 7	4808030	4502220	4811790	4949350	4760540	4786280
P04179;P04179-4	P04179;F5GXZ9;F5GYZ5;F5H3C5;F5H4R2;G5E9P6;G8JLJ2;P04179-2;P04179-3;P04179-4	SODM-4_HUMAN;SODM_HUMAN	SOD2	Superoxide dismutase [Mn], mitochondrial	4366820	5066040	4582900	4897070	4351570	5768060
P35613;P35613-2	P35613;A0A087WUV8;A0A087X2B5;I3L192;P35613-2;P35613-3;P35613-4;R4GMX5;R4GN83	BASI-2_HUMAN;BASI_HUMAN	BSG	Basigin	5162780	4062570	4441280	5508950	5451360	4263480
P53004	P53004	BIEA_HUMAN	BLVRA	Biliverdin reductase A	5150610	5528060	4936320	4531750	3785430	4856940
P67775	P62714;P67775;H0YBN9;P67775-2	PP2AA_HUMAN	PPP2CA	Serine/threonine-protein phosphatase 2A catalytic subunit alpha isoform	5181430	5454170	5499780	6005660	4770970	4844180
Q9HAV7	Q9HAV7	GRPE1_HUMAN	GRPEL1	GrpE protein homolog 1, mitochondrial	4519380	4590060	5083580	6089850	4747610	5837150
P13667	P13667	PDIA4_HUMAN	PDIA4	Protein disulfide-isomerase A4	5357080	4661430	4589610	5273890	4884240	4459840
O43175	O43175;A0A286YER3;A0A286YF22;A0A286YF34;A0A286YFA2;A0A286YFB2;A0A286YFC8;A0A286YFL2;A0A286YFM8;A0A2C9F2M7	SERA_HUMAN	PHGDH	D-3-phosphoglycerate dehydrogenase	3664290	9258970	3413520	2973620	8163960	4154970
Q9UBQ0	Q9UBQ0;F8VXU5;Q9UBQ0-2	VPS29_HUMAN	VPS29	Vacuolar protein sorting-associated protein 29	4704370	4814530	4729630	4902300	4609480	4881020
P25787	P25787;A0A024RA52;C9JCK5	PSA2_HUMAN	PSMA2	Proteasome subunit alpha type-2	4668800	4727800	4299790	4160220	4446130	4415350
P33993	P33993;P33993-2	MCM7_HUMAN	MCM7	DNA replication licensing factor MCM7	4739880	5677670	3730070	5731480	5126130	4558970
O94804	O94804	STK10_HUMAN	STK10	Serine/threonine-protein kinase 10	4014270	4601560	5565480	4796580	5003650	4294350
P53621	P53621;A0A3B3IS84;A0A3B3ISC6;A0A3B3IT15;A0A3B3ITV3;A0A3B3IU89;P53621-2	COPA_HUMAN	COPA	Coatomer subunit alpha	4533500	4977080	5717420	5183670	4720870	4170240
P61204;P84077	P61204;P84077;P61204-2;F5H423	ARF1_HUMAN;ARF3_HUMAN	ARF1;ARF3	ADP-ribosylation factor 3	4723900	4456640	5306220	5106000	5225210	4696160
P49588	P49588;P49588-2	SYAC_HUMAN	AARS	Alanine--tRNA ligase, cytoplasmic	4820330	4906380	5390210	4323000	4742950	4656540
O95433	O95433;G3V438;H0YJU2	AHSA1_HUMAN	AHSA1	Activator of 90 kDa heat shock protein ATPase homolog 1	5076740	5227720	4816970	5317750	5094080	4853560
P61077;P61077-2	P61077;P62837;A0A087WY85;A0A0A0MQU3;D6RAH7;D6RFM0;H9KV45;P61077-2;P61077-3;P62837-2	UB2D3-2_HUMAN;UB2D3_HUMAN	UBE2D3	Ubiquitin-conjugating enzyme E2 D3	3869070	3344270	3832020	4513390	4259370	4321320
P50213	P50213;H0YKD0;H0YL72;H0YLI6;H0YM64;H0YMU3	IDH3A_HUMAN	IDH3A	Isocitrate dehydrogenase [NAD] subunit alpha, mitochondrial	5021280	4613990	4723690	4798260	5033850	4970650
P19623	P19623;K7EL89	SPEE_HUMAN	SRM	Spermidine synthase	5721970	5189370	5189680	5588960	2419280	5132830
P78527	P78527;P78527-2	PRKDC_HUMAN	PRKDC	DNA-dependent protein kinase catalytic subunit	4153370	4777220	5169720	5250950	5354150	4066100
P01116-2	P01116;P01116-2	RASK-2_HUMAN	KRAS	Isoform of P01116, Isoform 2B of GTPase KRas	5754530	5092070	5011650	4811510	4464650	4527160
P63092;P63092-2;P63092-3;P63092-4;Q5JWF2;Q5JWF2-2	Q5JWF2;A0A0A0MR13;P63092;P63092-2;P63092-3;P63092-4;Q5JWF2-2	GNAS1-2_HUMAN;GNAS1_HUMAN;GNAS2-2_HUMAN;GNAS2-3_HUMAN;GNAS2-4_HUMAN;GNAS2_HUMAN	GNAS	Isoform of Q5JWF2, Guanine nucleotide-binding protein G(s) subunit alpha isoforms short	5404410	4949280	5072630	4668570	4940280	4405570
P84085	P84085;C9J1Z8	ARF5_HUMAN	ARF5	ADP-ribosylation factor 5	4741860	4712100	5406840	5290830	5395580	5186410
Q9Y3C8	Q9Y3C8	UFC1_HUMAN	UFC1	Ubiquitin-fold modifier-conjugating enzyme 1	5140290	5250620	4978250	4635990	3694400	5153500
Q9UHX1-2	Q9UHX1;A0A0J9YVP6;A0A0J9YVR6;A0A0J9YWM1;A0A0J9YXJ8;A0A0J9YXX5;A0A0J9YYL3;E9PL19;E9PMU7;E9PN18;E9PQ56;H0YEM1;Q9UHX1-2;Q9UHX1-3;Q9UHX1-4;Q9UHX1-5;Q9UHX1-6	PUF60-2_HUMAN	PUF60	Isoform of Q9UHX1, Isoform 2 of Poly(U)-binding-splicing factor PUF60	5136460	5339620	4673190	5125010	4755690	5136630
P13798	P13798;C9JIF9;H0YFE5;H7C1U0	ACPH_HUMAN	APEH	Acylamino-acid-releasing enzyme	4938830	4793760	4726120	4229550	5257840	4772560
Q08257	Q08257;Q08257-2	QOR_HUMAN	CRYZ	Quinone oxidoreductase	4304430	3872630	5444130	3672740	4851230	4669890
P43403	P43403;P43403-3	ZAP70_HUMAN	ZAP70	Tyrosine-protein kinase ZAP-70	5324600	5487530	5510400	4439160	3912500	3828120
Q9BZZ5-2	Q9BZZ5-2;Q9BZZ5-5	API5-2_HUMAN	API5	Isoform of Q9BZZ5, Isoform 2 of Apoptosis inhibitor 5	4794190	5147910	5042740	4366140	4760910	4510450
Q9NWV4	Q9NWV4	CZIB_HUMAN	CZIB	CXXC motif containing zinc binding protein	4742960	5109030	5026880	5097060	5323820	4754550
P54578	P54578;A6NJA2;P54578-2;P54578-3	UBP14_HUMAN	USP14	Ubiquitin carboxyl-terminal hydrolase 14	4783060	5038900	4606690	4951810	4854680	4869560
P04004	P04004	VTNC_HUMAN	VTN	Vitronectin		286998	2139980	20508400	7236130	15259300
P55809	P55809;Q9BYC2;E9PDW2;P55809-2	SCOT1_HUMAN	OXCT1	Succinyl-CoA:3-ketoacid coenzyme A transferase 1, mitochondrial	4808910	4929910	4352960	5288420	4501880	5063960
P29218;P29218-3	P29218;E5RG94;E5RGY4;E5RHE9;E5RI82;E5RIF4;E5RIP7;H0YBL1;P29218-2;P29218-3	IMPA1-3_HUMAN;IMPA1_HUMAN	IMPA1	Inositol monophosphatase 1	4917040	4364730	4675700	5393730	4011830	5379410
P98179	P98179	RBM3_HUMAN	RBM3	RNA-binding protein 3	4023880	5339920	4471860	5271370	1972130	4425090
Q96PE3;Q96PE3-2;Q96PE3-3;Q96PE3-4	Q96PE3;B8ZZB2;Q96PE3-2;Q96PE3-3;Q96PE3-4	INP4A-2_HUMAN;INP4A-3_HUMAN;INP4A-4_HUMAN;INP4A_HUMAN	INPP4A	Type I inositol 3,4-bisphosphate 4-phosphatase	4264110	4378830	5538830	4088590	4935820	4445360
O15372	O15372;A0A087WZK9;B3KS98;E5RJT0	EIF3H_HUMAN	EIF3H	Eukaryotic translation initiation factor 3 subunit H	5217790	4947100	4290100	4895500	4552480	4663310
P07686	P07686;H0Y9B6;H0YA83;Q5URX0	HEXB_HUMAN	HEXB	Beta-hexosaminidase subunit beta	4688470	4294380	5021340	4549780	4379090	5268300
P51610	P51610;A6NEM2;P51610-2;P51610-3;P51610-4	HCFC1_HUMAN	HCFC1	Host cell factor 1	4892280	4608940	4549140	4866060	5218290	5519480
Q15404	Q15404	RSU1_HUMAN	RSU1	Ras suppressor protein 1	5079830	4083480	4763560	4332650	4204430	4542230
Q16718	Q16718;A0A087X1G1;C9IZN5;F8WAS3;H7BYD0;Q16718-2	NDUA5_HUMAN	NDUFA5	NADH dehydrogenase [ubiquinone] 1 alpha subcomplex subunit 5	4069940	5191790	4664360	4961160	5319490	5684790
Q92499	Q92499;A0A087X2G1;F1T0B3;Q92499-3	DDX1_HUMAN	DDX1	ATP-dependent RNA helicase DDX1	4696660	4626150	4508290	4779760	4441960	4955770
Q99460	Q99460;A0A087WW66;Q99460-2	PSMD1_HUMAN	PSMD1	26S proteasome non-ATPase regulatory subunit 1	4714640	4618590	4642850	4879520	4554570	4575590
P55263	P55263;P55263-2;P55263-4	ADK_HUMAN	ADK	Adenosine kinase	4994040	4691060	3876440	4600070	4731090	4918800
Q7L014	Q7L014;A0A0C4DG89	DDX46_HUMAN	DDX46	Probable ATP-dependent RNA helicase DDX46	4802960	5102970	4929170	4546340	4630430	4523050
Q07960	Q07960;H0YE29	RHG01_HUMAN	ARHGAP1	Rho GTPase-activating protein 1	5265830	4809440	5051290	4255770	4579140	4992220
P09622	P09622;E9PEX6;P09622-2	DLDH_HUMAN	DLD	Dihydrolipoyl dehydrogenase, mitochondrial	3925830	3941450	4621680	4780750	4566110	4753750
Q13151	Q13151	ROA0_HUMAN	HNRNPA0	Heterogeneous nuclear ribonucleoprotein A0	4124860	4601890	5006720	4931010	4644540	5061500
Q9BUL8	Q9BUL8;C9J5C3;C9J6F3;C9J932;C9JND6;C9JSA3;F8WDF3;H7C5M9	PDC10_HUMAN	PDCD10	Programmed cell death protein 10	4781500	4717490	4971570	4163350	3877180	3981070
P19838;P19838-2	P19838;A0A494C157;A0A494C1E9;D6RC45;D6RH30;P19838-2	NFKB1-2_HUMAN;NFKB1_HUMAN	NFKB1	Nuclear factor NF-kappa-B p105 subunit	4733710	5280430	4168850	4473360	4972040	4796200
Q9H444	Q9H444	CHM4B_HUMAN	CHMP4B	Charged multivesicular body protein 4b	4796570	4402960	5614500	4266090	4690220	4295750
O60496	O60496;E5RIG9	DOK2_HUMAN	DOK2	Docking protein 2	5166010	4865730	5331430	4597640	3906320	4560900
Q02218	Q02218;A0A0D9SFS3;E9PCR7;E9PDF2;E9PFG7;Q02218-2;Q02218-3	ODO1_HUMAN	OGDH	2-oxoglutarate dehydrogenase, mitochondrial	4512690	4568670	4766690	4630790	4050120	4529670
Q13200	Q13200;Q13200-2;Q13200-3	PSMD2_HUMAN	PSMD2	26S proteasome non-ATPase regulatory subunit 2	4756760	4616820	4759050	4822030	4579300	4801160
Q92900;Q92900-2	Q92900;Q92900-2	RENT1-2_HUMAN;RENT1_HUMAN	UPF1	Regulator of nonsense transcripts 1	4408000	4578270	5011050	4838430	4773850	4807450
P43034	P43034;P43034-2	LIS1_HUMAN	PAFAH1B1	Platelet-activating factor acetylhydrolase IB subunit alpha	4720460	4581400	4593190	4625760	4126920	4705490
P34932	P34932;A0A087WTS8;A0A087WYC1	HSP74_HUMAN	HSPA4	Heat shock 70 kDa protein 4	4561650	4649850	4485110	4589220	4721750	4562250
Q96RE7	Q96RE7	NACC1_HUMAN	NACC1	Nucleus accumbens-associated protein 1	4872020	4975400	4704940	5111150	4793330	4822030
O95777	O95777;C9JIZ0;C9JNV3;F2Z2Y6	LSM8_HUMAN	LSM8	U6 snRNA-associated Sm-like protein LSm8	4486690	4449320	4659350	4914030	5170090	4852000
P57764	P57764;E9PIB2;G3V1A6	GSDMD_HUMAN	GSDMD	Gasdermin-D	5393940	4550740	4497200	5964220	3676110	4448620
Q92619	Q92619;F5H1R4;K7EM85;K7ES98;Q92619-2	HMHA1_HUMAN	ARHGAP45	Rho GTPase-activating protein 45	4500880	4809160	5875940	4409890	4504490	4280640
P33991	P33991;A0A3B3IS57;A0A3B3IT92;A0A3B3IU45;E5RG31	MCM4_HUMAN	MCM4	DNA replication licensing factor MCM4	3980550	4342050	3387650	5232230	4790920	4238600
P23743	P23743;C9JM35;F8VNZ9;F8W1H7;F8W1M3;G3V327;P23743-2;P23743-3	DGKA_HUMAN	DGKA	Diacylglycerol kinase alpha	5111320	5390090	4577330	4244840	4225540	4569810
P63279	P63279;B0QYN7;H3BPC4;H3BQQ9	UBC9_HUMAN	UBE2I	SUMO-conjugating enzyme UBC9	4692100	4790480	4372190	4238170	4713770	4971420
P22061-2	P22061;A0A0A0MRJ6;A0A3F2YNX8;F6S8N6;H7BY58;P22061-2	PIMT-2_HUMAN	PCMT1	Isoform of P22061, Isoform 2 of Protein-L-isoaspartate(D-aspartate) O-methyltransferase	4493010	4357130	4194070	4548110	5065450	5164440
P62995;P62995-3	P62995;P62995-3	TRA2B-3_HUMAN;TRA2B_HUMAN	TRA2B	Transformer-2 protein homolog beta	4561210	4695230	4335290	4996690	5292920	4999040
O43852;O43852-3	O43852;O43852-10;O43852-11;O43852-13;O43852-14;O43852-3;O43852-5;O43852-6	CALU-3_HUMAN;CALU_HUMAN	CALU	Calumenin	4403960	4877200	4604820	5721800	6653790	4711500
Q15459	Q15459;Q15459-2	SF3A1_HUMAN	SF3A1	Splicing factor 3A subunit 1	5000000	4936540	4319770	4316140	4594380	4665360
P35236;P35236-2;P35236-3	P35236;C9IYI6;E7EUM0;E9PE54;H7C5I3;J3KR55;P35236-2;P35236-3	PTN7-2_HUMAN;PTN7-3_HUMAN;PTN7_HUMAN	PTPN7	Tyrosine-protein phosphatase non-receptor type 7	4421870	4283990	4597480	4976780	4353710	5074570
P21281	P21281;H0YC04	VATB2_HUMAN	ATP6V1B2	V-type proton ATPase subunit B, brain isoform	4612430	4574170	4486870	4354610	4101370	4698790
Q9BSJ8-2	Q9BSJ8;Q9BSJ8-2	ESYT1-2_HUMAN	ESYT1	Isoform of Q9BSJ8, Isoform 2 of Extended synaptotagmin-1	3643330	4904070	5395230	5395580	4269480	3447730
Q15370;Q15370-2	Q15370;A0A0B4J296;B8ZZU8;I3L0M9;Q15370-2	ELOB-2_HUMAN;ELOB_HUMAN	ELOB	Elongin-B	4790990	4669600	4828450	5381400	5041840	4875010
P09661	P09661;H0YKK0	RU2A_HUMAN	SNRPA1	U2 small nuclear ribonucleoprotein A'	4183460	4063440	4718620	4318070	5743870	4736730
Q96JM3	Q96JM3	CHAP1_HUMAN	CHAMP1	Chromosome alignment-maintaining phosphoprotein 1	4641510	4708080	4309260	4338330	4616010	4456950
P52294	P52294	IMA5_HUMAN	KPNA1	Importin subunit alpha-5	4899290	4528410	4494650	4687900	4133400	4698680
Q9HB71	Q9HB71;Q9HB71-3	CYBP_HUMAN	CACYBP	Calcyclin-binding protein	4585730	3993400	4026760	4457010	4228460	3900970
P26639	A2RTX5;P26639;A2RTX5-2;B7ZLP8;P26639-2	SYTC_HUMAN	TARS	Threonine--tRNA ligase, cytoplasmic	4668190	4406670	5982120	3976240	4025140	3728450
O14933	O14933;E9PKW8;E9PQT7;O14933-2	UB2L6_HUMAN	UBE2L6	Ubiquitin/ISG15-conjugating enzyme E2 L6	3221330	5360870	3968740	5089720	3677400	4898450
Q08380	Q08380	LG3BP_HUMAN	LGALS3BP	Galectin-3-binding protein	4574690	6311220	5013810	4527190	2259110	3848280
P05023;P05023-3;P05023-4	P05023;P05023-3;P05023-4	AT1A1-3_HUMAN;AT1A1-4_HUMAN;AT1A1_HUMAN	ATP1A1	Sodium/potassium-transporting ATPase subunit alpha-1	2920520	2868280	4659850	4434730	4602070	3184970
Q02790	Q02790	FKBP4_HUMAN	FKBP4	Peptidyl-prolyl cis-trans isomerase FKBP4	4353270	4500850	4156700	4662570	4785670	4318330
P14324;P14324-2	P14324;A0A087WTP2;A0A087WVN4;A0A087X1D8;P14324-2	FPPS-2_HUMAN;FPPS_HUMAN	FDPS	Farnesyl pyrophosphate synthase	4413310	4608170	4647170	3779170	5259540	3885830
P80217;P80217-2	P80217;P80217-2	IN35-2_HUMAN;IN35_HUMAN	IFI35	Interferon-induced 35 kDa protein	3834020	5064300	4249180	5838270	3173250	4837870
Q9UBT2	Q9UBT2;K7EPL2;K7ESK7;Q9UBT2-2	SAE2_HUMAN	UBA2	SUMO-activating enzyme subunit 2	4374290	4657000	4385260	4309480	4175610	4649860
Q9Y224	Q9Y224;G3V4C6;H0YJB9	RTRAF_HUMAN	RTRAF	RNA transcription, translation and transport factor protein	4384020	4497840	4294770	4636670	4538370	5066420
P29590	P29590;P29590-11	PML_HUMAN	PML	Protein PML	4600080	4676320	4324470	4586790	4516940	4956030
Q71U36;Q71U36-2	P0DPH7;P0DPH8;Q6PEY2;Q71U36;F8VQQ4;P0DPH7-2;Q71U36-2	TBA1A-2_HUMAN;TBA1A_HUMAN	TUBA1A	Tubulin alpha-1A chain	3692100	4000590	4524630	4787170	5381630	5307180
Q9P2E9	Q9P2E9;A0A087WU26;A0A087WVV2;F8W7S5;Q9P2E9-3	RRBP1_HUMAN	RRBP1	Ribosome-binding protein 1	4286490	3501020	4756770	5587610	5708770	4389200
O43488	O43488;H3BLU7	ARK72_HUMAN	AKR7A2	Aflatoxin B1 aldehyde reductase member 2	4799510	4542740	3864820	3775150	4349660	5062760
O43776	O43776	SYNC_HUMAN	NARS	Asparagine--tRNA ligase, cytoplasmic	4326760	4435320	5130410	4107980	4230820	4393370
P55060;P55060-3	P55060;P55060-3;P55060-4	XPO2-3_HUMAN;XPO2_HUMAN	CSE1L	Exportin-2	4378220	5311640	4235830	4653010	4427410	3977260
Q8NCW5	Q8NCW5;Q8NCW5-2	NNRE_HUMAN	NAXE	NAD(P)H-hydrate epimerase	4986130	3977430	3930080	3911870	4149720	4835360
Q96B97-2	Q96B97;Q5JPT2;Q5VSN0;Q96B97-2;Q96B97-3	SH3K1-2_HUMAN	SH3KBP1	Isoform of Q96B97, Isoform 2 of SH3 domain-containing kinase-binding protein 1	3798930	4138280	4979210	4347940	3879950	4036750
Q9UBQ5	Q9UBQ5;K7ERF1;K7ES31;Q9UBQ5-2	EIF3K_HUMAN	EIF3K	Eukaryotic translation initiation factor 3 subunit K	4314260	4695510	4842750	4866880	4312640	4699340
A0AVT1	A0AVT1;A0AVT1-2	UBA6_HUMAN	UBA6	Ubiquitin-like modifier-activating enzyme 6	4296910	3903000	4664560	4666450	3762600	4286910
P00747	P00747;P08519	PLMN_HUMAN	PLG	Plasminogen			1627990	19292200	9442300	12217500
P62841	P62841;A0A0B4J2B4;K7ELC2;K7EM56;K7EQJ5;S4R417	RS15_HUMAN	RPS15	40S ribosomal protein S15	4178190	4554600	3868660	4745360	4999850	3659940
P42167	G5E972;P42167;P42167-2	LAP2B_HUMAN	TMPO	Isoform of P42166, Lamina-associated polypeptide 2, isoforms beta/gamma	2612350	2677100	3419250	3755900	6575430	3231900
P27695	P27695;G3V3M6;G3V5Q1;H7C4A8	APEX1_HUMAN	APEX1	DNA-(apurinic or apyrimidinic site) lyase	3873600	4224630	4563880	3822260	3911580	4642880
O60841	O60841;A0A087WUT6	IF2P_HUMAN	EIF5B	Eukaryotic translation initiation factor 5B	4704070	4643420	4316920	4878840	4191120	4173940
Q9UIJ7	Q9UIJ7;Q9UIJ7-2;Q9UIJ7-3	KAD3_HUMAN	AK3	GTP:AMP phosphotransferase AK3, mitochondrial	4000770	3531100	3729100	4012910	3830270	5027740
P55084	P55084;B5MD38;F5GZQ3;P55084-2	ECHB_HUMAN	HADHB	Trifunctional enzyme subunit beta, mitochondrial	3246390	3281490	4543520	4222210	4735480	4436830
Q9H307	Q9H307	PININ_HUMAN	PNN	Pinin	4756670	4825050	4399780	4461550	4902050	4517860
Q15691	Q15691	MARE1_HUMAN	MAPRE1	Microtubule-associated protein RP/EB family member 1	4428480	4475660	4895750	4057420	3779050	4012870
Q08AF3	Q08AF3;B4E128;Q08AF3-2	SLFN5_HUMAN	SLFN5	Schlafen family member 5	4487900	4649390	5048110	4205500	3499000	3378380
Q14061	Q14061;C9J8T6	COX17_HUMAN	COX17	Cytochrome c oxidase copper chaperone	3389750	5489690	6610120	6486130	4807590	4133640
Q9H3K6	Q9H3K6;A0A087WZT3;H3BTW0;H3BV85;H3BVE0;Q9H3K6-2;A0A0B4J295	BOLA2_HUMAN	BOLA2B	BolA-like protein 2	4454800	4085080	3928750	4405620	3792460	4956360
O15258	O15258;A0A0A0MR06;Q5T091;Q5T092	RER1_HUMAN	RER1	Protein RER1	4080150	4367520	4486230	4497200	4279980	4827750
O00499-2;O00499-4;O00499-6;O00499-7;O00499-9	O00499;O00499-10;O00499-11;O00499-2;O00499-3;O00499-4;O00499-5;O00499-6;O00499-7;O00499-8;O00499-9	BIN1-2_HUMAN;BIN1-4_HUMAN;BIN1-6_HUMAN;BIN1-7_HUMAN;BIN1-9_HUMAN	BIN1	Isoform of O00499, Isoform IIB of Myc box-dependent-interacting protein 1	5387280	5028520	4378280	4917920	3474790	3907300
P18077	P18077	RL35A_HUMAN	RPL35A	60S ribosomal protein L35a	4593550	4487970	3678200	4608740	5646300	4764040
Q96PP8	Q96PP8;E7ETN8;Q96PP8-2	GBP5_HUMAN	GBP5	Guanylate-binding protein 5	4507190	4540830	3781040	4472290	3126330	3967310
P32455	P32455;P32456	GBP1_HUMAN	GBP1	Guanylate-binding protein 1	3477660	4343680	3687910	3690630	4375170	3799580
P16070;P16070-10;P16070-11;P16070-12;P16070-13;P16070-14;P16070-16;P16070-17;P16070-18;P16070-3;P16070-4;P16070-5;P16070-6;P16070-7;P16070-8	P16070;H0Y2P0;H0Y5E4;H0YCV9;H0YD17;H0YD90;H0YDW7;H0YDX6;H0YEU1;H0YEV3;P16070-10;P16070-11;P16070-12;P16070-13;P16070-14;P16070-15;P16070-16;P16070-17;P16070-18;P16070-3;P16070-4;P16070-5;P16070-6;P16070-7;P16070-8;P16070-9	CD44-10_HUMAN;CD44-11_HUMAN;CD44-12_HUMAN;CD44-13_HUMAN;CD44-14_HUMAN;CD44-16_HUMAN;CD44-17_HUMAN;CD44-18_HUMAN;CD44-3_HUMAN;CD44-4_HUMAN;CD44-5_HUMAN;CD44-6_HUMAN;CD44-7_HUMAN;CD44-8_HUMAN;CD44_HUMAN	CD44	CD44 antigen	2670080	2942480	4289770	5080520	4123350	4273610
O75915	O75915	PRAF3_HUMAN	ARL6IP5	PRA1 family protein 3	2795450	3107280	3409300	3668430	4506410	2767880
P18583-5	P18583;P18583-10;P18583-2;P18583-3;P18583-4;P18583-5;P18583-6;P18583-7;P18583-8;P18583-9	SON-5_HUMAN	SON	Isoform of P18583, Isoform D of Protein SON	4226100	4638090	4118970	4803630	4774520	4836000
O75533	O75533	SF3B1_HUMAN	SF3B1	Splicing factor 3B subunit 1	4079640	4459630	4831530	4240350	4608610	3689010
Q9H1E3	Q9H1E3	NUCKS_HUMAN	NUCKS1	Nuclear ubiquitous casein and cyclin-dependent kinase substrate 1	3985660	4323720	4007120	4588040	5239670	4323110
Q9Y266	Q9Y266	NUDC_HUMAN	NUDC	Nuclear migration protein nudC	4563590	4629910	4001120	4393210	4416100	4121380
Q9H0R4	Q9H0R4;K7ER15;Q9H0R4-2	HDHD2_HUMAN	HDHD2	Haloacid dehalogenase-like hydrolase domain-containing protein 2	3771750	5209110	3446720	3435860	4003890	4768340
Q96RU3;Q96RU3-2;Q96RU3-3;Q96RU3-4;Q96RU3-5	Q96RU3;B7ZL14;H0Y7W6;Q96RU3-2;Q96RU3-3;Q96RU3-4;Q96RU3-5	FNBP1-2_HUMAN;FNBP1-3_HUMAN;FNBP1-4_HUMAN;FNBP1-5_HUMAN;FNBP1_HUMAN	FNBP1	Formin-binding protein 1	4469200	4347420	4673380	4194320	4300760	4143770
Q15424;Q15424-3;Q15424-4	Q15424;K7EII0;Q15424-2;Q15424-3;Q15424-4	SAFB1-3_HUMAN;SAFB1-4_HUMAN;SAFB1_HUMAN	SAFB	Scaffold attachment factor B1	4405530	4485510	4265220	4152010	4801840	4507070
P48960;P48960-2;P48960-3	P48960;P48960-2;P48960-3	CD97-2_HUMAN;CD97-3_HUMAN;CD97_HUMAN	CD97	CD97 antigen	4945230	4375880	4571820	4274940	4131180	4271750
P62273	P62273;A0A087WTT6;A0A2R8Y6P7;A0A2R8Y851;P62273-2	RS29_HUMAN	RPS29	40S ribosomal protein S29	4111660	3866730	4201500	4664880	4891730	4637000
Q63HN8;Q63HN8-4	A0A0A0MTC1;Q63HN8;A0A0A0MTR7;Q63HN8-4	RN213-4_HUMAN;RN213_HUMAN	RNF213	E3 ubiquitin-protein ligase RNF213	3808660	3087930	5360250	5694140	3378850	3326820
A6NHR9	A6NHR9;A6NHR9-2;J3KTL8;J3QSH1	SMHD1_HUMAN	SMCHD1	Structural maintenance of chromosomes flexible hinge domain-containing protein 1	3748340	4090790	3988810	3947810	4535580	4350310
Q9BUF5	Q13509;Q9BUF5;K7ESM5;Q13509-2;A0A0B4J269	TBB6_HUMAN	TUBB6	Tubulin beta-6 chain	2754520	4048820	3378550	4603840	8053290	4525330
Q96G03	Q96G03	PGM2_HUMAN	PGM2	Phosphoglucomutase-2	4040610	4126890	4475300	3829170	4163920	4467980
P62330	P62330	ARF6_HUMAN	ARF6	ADP-ribosylation factor 6	4131030	4020460	5810310	4731250	4222160	4465450
Q9BWF3	Q9BQ04;Q9BWF3;D6R9K7;E9PB51;E9PLB0;E9PM61;J3QRR5;Q9BWF3-2;Q9BWF3-3;Q9BWF3-4;U3KQD5	RBM4_HUMAN	RBM4	RNA-binding protein 4	4669270	4577620	3953310	4715250	4544720	4764360
Q14683	Q14683;G8JLG1	SMC1A_HUMAN	SMC1A	Structural maintenance of chromosomes protein 1A	3638960	3933990	4563490	4019270	4885370	4168990
Q8NF50	Q8NF50;A2A369;Q8NF50-2;Q8NF50-3;Q8NF50-4	DOCK8_HUMAN	DOCK8	Dedicator of cytokinesis protein 8	4498290	4605450	4503030	4364120	3757240	3683450
P17174	P17174	AATC_HUMAN	GOT1	Aspartate aminotransferase, cytoplasmic	3951830	4099600	4177550	3897480	4215510	4357090
Q93009;Q93009-3	Q93009;F5H2X1;H3BND8;Q93009-3	UBP7-3_HUMAN;UBP7_HUMAN	USP7	Ubiquitin carboxyl-terminal hydrolase 7	4805350	4318070	4203420	4193110	4100150	4416670
O00231	O00231;J3QRY4;O00231-2	PSD11_HUMAN	PSMD11	26S proteasome non-ATPase regulatory subunit 11	4544420	4126660	4245920	4188440	3873460	4097510
O60763	O60763;O60763-2	USO1_HUMAN	USO1	General vesicular transport factor p115	4379730	4325100	4056700	3996250	4464690	4002780
P49736	P49736;H0Y8E6	MCM2_HUMAN	MCM2	DNA replication licensing factor MCM2	3925650	4824390	3297140	4953160	4567670	3984390
Q99627	Q99627;E9PGT6;Q99627-2	CSN8_HUMAN	COPS8	COP9 signalosome complex subunit 8	4236320	4338840	3964050	4352820	4300910	4639230
P61011	P61011;A0A0D9SFN7;G3V346;G3V3L9;G3V480	SRP54_HUMAN	SRP54	Signal recognition particle 54 kDa protein	3952820	3809110	4426650	4352630	4621110	4422710
P13861;P13861-2	P13861;H7C1L0;P13861-2	KAP2-2_HUMAN;KAP2_HUMAN	PRKAR2A	cAMP-dependent protein kinase type II-alpha regulatory subunit	4297900	4085110	4335960	3888260	3924850	4513240
P15170-2;P15170-3	P15170;Q8IYD1;H3BR35;H3BSV8;P15170-2;P15170-3	ERF3A-2_HUMAN;ERF3A-3_HUMAN	GSPT1	Isoform of P15170, Isoform 2 of Eukaryotic peptide chain release factor GTP-binding subunit ERF3A	4415230	4428150	3978280	4441260	4126340	4088720
Q16891-2	Q16891;A0A087WYS0;B9A067;D6RAW4;Q16891-2;Q16891-3;Q16891-4	MIC60-2_HUMAN	IMMT	Isoform of Q16891, Isoform 2 of MICOS complex subunit MIC60	4038120	4324110	4216000	4076770	4088780	4157810
P48739;P48739-2;P48739-3	P48739;A0A0A0MSW4;P48739-2;P48739-3	PIPNB-2_HUMAN;PIPNB-3_HUMAN;PIPNB_HUMAN	PITPNB	Phosphatidylinositol transfer protein beta isoform	4430020	4429120	4448050	4075650	3706330	3971240
P84090	P84090;G3V279	ERH_HUMAN	ERH	Enhancer of rudimentary homolog	3898640	4470220	4305790	4905420	4288060	4106800
P43246	P43246;A0A2R8Y6P0;A0A2R8Y713;A0A2R8YFH0;A0A2R8YG02;E9PHA6;P43246-2	MSH2_HUMAN	MSH2	DNA mismatch repair protein Msh2	4165630	4546630	3634060	4491940	4754420	4720000
Q9Y3L3	Q6ZT62;Q9Y3L3;Q6ZT62-2;Q9Y3L3-2	3BP1_HUMAN	SH3BP1	SH3 domain-binding protein 1	3521490	3544800	4394760	3694510	4401420	4034460
Q9BZL1	Q9BZL1;K7EQ43	UBL5_HUMAN	UBL5	Ubiquitin-like protein 5	4477310	4435250	4322980	4569550	2431560	3881850
Q9H4M9	Q9H4M9;Q9NZN3;A0A024R571;C9J2Z4;C9JC03;C9JDQ8	EHD1_HUMAN	EHD1	EH domain-containing protein 1	4424570	4111960	4655900	3819300	4066780	3652380
Q16401;Q16401-2	Q16401;Q16401-2	PSMD5-2_HUMAN;PSMD5_HUMAN	PSMD5	26S proteasome non-ATPase regulatory subunit 5	3996910	3896150	3840780	4167690	4185730	5082390
Q9Y5K5-2;Q9Y5K5-3;Q9Y5K5-4	Q9Y5K5;H0Y4E0;H0Y4K0;H0Y636;H0Y6Y4;Q5LJA5;Q5LJA9;Q9Y5K5-2;Q9Y5K5-3;Q9Y5K5-4	UCHL5-2_HUMAN;UCHL5-3_HUMAN;UCHL5-4_HUMAN	UCHL5	Isoform of Q9Y5K5, Isoform 2 of Ubiquitin carboxyl-terminal hydrolase isozyme L5	4006900	4109100	3970590	4484440	4239700	4029280
Q92522	Q92522	H1X_HUMAN	H1FX	Histone H1x	3133700	3275420	2496790	3524430	5229290	4256820
Q9Y5B9	Q9Y5B9	SP16H_HUMAN	SUPT16H	FACT complex subunit SPT16	4304500	4491070	4338250	4430990	3967270	3935010
P51665	P51665;H3BNT7;H3BTM8	PSMD7_HUMAN	PSMD7	26S proteasome non-ATPase regulatory subunit 7	4261790	4101190	4130560	4090620	3661260	3939470
P17480	P17480;E9PKP7;P17480-2	UBF1_HUMAN	UBTF	Nucleolar transcription factor 1	4671470	4822870	4618320	4971650	3571230	4890640
Q16740	Q16740;M0R208	CLPP_HUMAN	CLPP	ATP-dependent Clp protease proteolytic subunit, mitochondrial	4165680	4023830	4255970	4666250	3950720	4461010
P16298;P16298-4	P16298;P48454;Q08209;E7ETC2;E9PK68;E9PPC8;G3V111;H0YB02;P16298-2;P16298-3;P16298-4;P48454-2;P48454-3;Q08209-2;Q08209-3;Q08209-5;Q5F2F8	PP2BB-4_HUMAN;PP2BB_HUMAN	PPP3CB	Serine/threonine-protein phosphatase 2B catalytic subunit beta isoform	4654400	4182840	4547800	3957210	3563610	4133890
Q9NYF8;Q9NYF8-2	Q9NYF8;A0A1W2PQ43;E9PJA7;E9PK09;E9PK91;E9PKI6;E9PQN2;H0YF00;Q9NYF8-2;Q9NYF8-3;Q9NYF8-4	BCLF1-2_HUMAN;BCLF1_HUMAN	BCLAF1	Bcl-2-associated transcription factor 1	4172090	4543470	4198670	4361120	4175950	4365890
Q16881;Q16881-2;Q16881-3;Q16881-4;Q16881-5;Q16881-6	Q16881;A0A087WSW9;A0A087WSY9;A0A182DWI3;E2QRB9;E9PIR7;E9PKD3;F8W809;Q16881-2;Q16881-3;Q16881-4;Q16881-5;Q16881-6;Q16881-7	TRXR1-2_HUMAN;TRXR1-3_HUMAN;TRXR1-4_HUMAN;TRXR1-5_HUMAN;TRXR1-6_HUMAN;TRXR1_HUMAN	TXNRD1	Thioredoxin reductase 1, cytoplasmic	3978490	4089900	4571240	3776700	3598380	4008450
P36542	P36542;P36542-2	ATPG_HUMAN	ATP5F1C	ATP synthase subunit gamma, mitochondrial	3102670	3442000	4413390	4354800	4797550	3995010
P30084	P30084	ECHM_HUMAN	ECHS1	Enoyl-CoA hydratase, mitochondrial	3627100	4257340	3692290	4038780	4424660	4680290
Q10567-3	Q10567;C9J1E7;H7C034;Q10567-2;Q10567-3;Q10567-4	AP1B1-3_HUMAN	AP1B1	Isoform of Q10567, Isoform C of AP-1 complex subunit beta-1	4402720	4377160	4380270	4031850	3883740	3755380
O75340	O75340;A0A024QZ42;O75340-2	PDCD6_HUMAN	PDCD6	Programmed cell death protein 6	3956930	3693460	4067680	3845120	3881910	4735050
Q9NP79	Q9NP79;A0A087WY55;Q5TGM0;Q9NP79-2	VTA1_HUMAN	VTA1	Vacuolar protein sorting-associated protein VTA1 homolog	3988410	4285630	4169730	4087550	4346110	4554280
Q96PK6	Q96PK6	RBM14_HUMAN	RBM14	RNA-binding protein 14	3833120	3887920	4000950	4077440	4237230	4383240
O43143	O43143;O60231;Q14562;A0A140T947;F5H658	DHX15_HUMAN	DHX15	Pre-mRNA-splicing factor ATP-dependent RNA helicase DHX15	3590260	4009540	4251570	4203090	4427230	3758940
P48426;P48426-2	P48426;H7BXS3;P48426-2;S4R320	PI42A-2_HUMAN;PI42A_HUMAN	PIP4K2A	Phosphatidylinositol 5-phosphate 4-kinase type-2 alpha	3654310	3973650	4907630	3861740	4150230	4258800
Q12768	Q12768	WASC5_HUMAN	WASHC5	WASH complex subunit 5	4194060	4263900	4491840	3924330	3780540	3665960
Q14498;Q14498-2	Q14498;A0A0U1RQH7;G3XAC6;H0Y4X3;Q14498-2;Q14498-3;Q5QP23	RBM39-2_HUMAN;RBM39_HUMAN	RBM39	RNA-binding protein 39	3555590	3878700	3896660	4552800	4455100	4360070
Q9UBE0	Q9UBE0;M0QZS6	SAE1_HUMAN	SAE1	SUMO-activating enzyme subunit 1	4279360	4359520	3991610	4021280	4041240	4493170
Q32MZ4-2;Q32MZ4-3	Q32MZ4;Q32MZ4-2;Q32MZ4-3;Q32MZ4-4	LRRF1-2_HUMAN;LRRF1-3_HUMAN	LRRFIP1	Isoform of Q32MZ4, Isoform 2 of Leucine-rich repeat flightless-interacting protein 1	4292570	4384390	4107390	4700890	4698380	4018200
P23497-4	P23497;Q9H930;C9JBL0;E9PHV6;H7BYP4;P23497-2;P23497-3;P23497-4;P23497-5;P23497-6;P23497-7;Q9H930-1;Q9H930-2;Q9H930-3;U5Y3L1	SP100-4_HUMAN	SP100	Isoform of P23497, Isoform Sp100-C of Nuclear autoantigen Sp-100	4068100	4113960	3748350	4312650	4416130	4746880
Q13428-3	Q13428;A0A3B3IS06;E7ETY2;H0Y8Y7;J3KQ96;Q13428-2;Q13428-3;Q13428-4;Q13428-5;Q13428-6;Q13428-7;Q13428-8	TCOF-3_HUMAN	TCOF1	Isoform of Q13428, Isoform 3 of Treacle protein	4794850	4605000	4071060	3991950	3634440	4055620
P16150	P16150;C9JUK7	LEUK_HUMAN	SPN	Leukosialin	4827150	3659330	4890370	4384920	3703750	4306020
P51571	P51571	SSRD_HUMAN	SSR4	Translocon-associated protein subunit delta	4541630	3969900	3844100	4317780	3593730	3695690
Q9Y262	Q9Y262;B0QY89;B0QY90;H0Y7E6;Q9Y262-2	EIF3L_HUMAN	EIF3L	Eukaryotic translation initiation factor 3 subunit L	4378270	4380740	4115730	3828560	3711470	3651010
Q9Y376	Q9H9S4;Q9Y376;A0A087X0K1;B7ZBJ4;Q5TAW7	CAB39_HUMAN	CAB39	Calcium-binding protein 39	4466300	4167010	4498000	3828580	3416850	3948540
Q9Y4L1	Q9Y4L1;A0A087WWI4;A0A087X054;A0A494C039;E9PJ21;K7EQK2;Q9Y4L1-2	HYOU1_HUMAN	HYOU1	Hypoxia up-regulated protein 1	4109200	3363020	4180960	4263080	4050000	4069860
P23193	P23193;Q15560;A0A0A0MT58;A0A1W2PPZ5;A0A1W2PRL9;B7Z4S1;P23193-2;Q15560-2;Q5JRI7	TCEA1_HUMAN	TCEA1	Transcription elongation factor A protein 1	3972530	3843410	3564950	3321370	4030640	3792180
O43809	O43809	CPSF5_HUMAN	NUDT21	Cleavage and polyadenylation specificity factor subunit 5	4171560	3839190	3597350	3750520	3460860	3949250
P11169	P11169;Q8TDB8;Q8TDB8-2;Q8TDB8-3;Q8TDB8-4;Q8TDB8-5	GTR3_HUMAN	SLC2A3	Solute carrier family 2, facilitated glucose transporter member 3	2069240	3012340	3890510	3952910	4784540	2792520
P40939	P40939;A0A2R8Y4F5;H0YFD6	ECHA_HUMAN	HADHA	Trifunctional enzyme subunit alpha, mitochondrial	2818720	3048340	4310280	3764700	4215070	3886690
Q15029;Q15029-2	Q15029;Q15029-2;Q15029-3	U5S1-2_HUMAN;U5S1_HUMAN	EFTUD2	116 kDa U5 small nuclear ribonucleoprotein component	4164730	4146310	3952350	4146190	3903140	4286850
P06865	P06865;H3BP20;H3BS10;H3BTD4;H3BU85	HEXA_HUMAN	HEXA	Beta-hexosaminidase subunit alpha	4036530	3807730	4594020	3796680	3957950	4349880
O43681	O43681;A0A087WXS7	ASNA_HUMAN	ASNA1	ATPase ASNA1	4406720	4237450	4539540	4142030	3930100	4479460
P83731	P83731;C9JNW5;C9JXB8	RL24_HUMAN	RPL24	60S ribosomal protein L24	3119360	3056780	2503970	4573310	5197670	4043650
P20042	P20042	IF2B_HUMAN	EIF2S2	Eukaryotic translation initiation factor 2 subunit 2	3729020	3794880	4411870	4496980	4340170	3719160
O43670;O43670-2;O43670-4	O43670;J3QRS9;O43670-2;O43670-3;O43670-4	ZN207-2_HUMAN;ZN207-4_HUMAN;ZN207_HUMAN	ZNF207	BUB3-interacting and GLEBS motif-containing protein ZNF207	4058770	4114160	3448140	4353170	3916930	4155640
Q96RQ9;Q96RQ9-2	Q96RQ9;M0QYH9;M0R1L1;Q96RQ9-2	OXLA-2_HUMAN;OXLA_HUMAN	IL4I1	L-amino-acid oxidase	2436120	2918760	4471270	5440820	2535420	3299700
Q9NVP2	Q9NVP2;K7EIL9;K7ELW9;K7EM93;K7ES22	ASF1B_HUMAN	ASF1B	Histone chaperone ASF1B	4378980	4622360	3181060	5077530	3096680	4060100
P22570;P22570-7	P22570;A0A0A0MSZ4;A0A0A0MT64;A0A0A0MTN9;A0A0A0MTR6;A0A0C4DFN8;A0A0C4DGN7;J3QQX3;P22570-2;P22570-3;P22570-4;P22570-5;P22570-6;P22570-7	ADRO-7_HUMAN;ADRO_HUMAN	FDXR	NADPH:adrenodoxin oxidoreductase, mitochondrial	3117380	3649320	5160650	3416620	3048500	3053650
Q9H832	Q9H832;D6RB11;I3L286;Q9H832-2	UBE2Z_HUMAN	UBE2Z	Ubiquitin-conjugating enzyme E2 Z	4153470	4072670	3724300	4085560	3949720	4158890
P14854	P14854	CX6B1_HUMAN	COX6B1	Cytochrome c oxidase subunit 6B1	3811840	4086970	3541260	4341320	3935550	4468110
P07766	P07766;E9PSH8	CD3E_HUMAN	CD3E	T-cell surface glycoprotein CD3 epsilon chain	3297250	3560930	3936540	3438580	4186370	3354560
O75351	O75351	VPS4B_HUMAN	VPS4B	Vacuolar protein sorting-associated protein 4B	4002380	3641140	4486820	3867070	3537090	4187020
P55884;P55884-2	P55884;C9JQN7;C9JZG1;P55884-2	EIF3B-2_HUMAN;EIF3B_HUMAN	EIF3B	Eukaryotic translation initiation factor 3 subunit B	3927110	4117810	4102330	4000220	3818310	3717640
P04264	P04259;P04264	K2C1_HUMAN	KRT1	Keratin, type II cytoskeletal 1	3681800	2499060	3089300	958731	1527100	5114590
Q99873;Q99873-2;Q99873-3	Q99873;E9PIX6;E9PKG1;E9PNR9;E9PQ98;H0YDE4;Q99873-2;Q99873-3	ANM1-2_HUMAN;ANM1-3_HUMAN;ANM1_HUMAN	PRMT1	Protein arginine N-methyltransferase 1	3955550	4505010	4119900	4508880	3094600	3660850
Q12872;Q12872-2	Q12872;Q12872-2	SFSWA-2_HUMAN;SFSWA_HUMAN	SFSWAP	Splicing factor, suppressor of white-apricot homolog	3713630	3643080	3985290	4226410	4726690	3954830
P14406	P14406;D6RGV5;D6RIE3;H0UI06	CX7A2_HUMAN	COX7A2	Cytochrome c oxidase subunit 7A2, mitochondrial	3578350	3856060	3380600	3645320	3493640	4814070
Q96IY1	Q96IY1	NSL1_HUMAN	NSL1	Kinetochore-associated protein NSL1 homolog	3239310	3927850	3567060	4026470	4159180	3978860
Q9Y3C6	Q9Y3C6	PPIL1_HUMAN	PPIL1	Peptidyl-prolyl cis-trans isomerase-like 1	3495850	4487440	3667750	3954580	3131320	3450650
O94979	O94979;D6REX3;D6RHZ5;H0Y8V7;H0Y9K1;H0YAB3;H7BXG7;O94979-10;O94979-2;O94979-3;O94979-4;O94979-5;O94979-6;O94979-7;O94979-8;O94979-9	SC31A_HUMAN	SEC31A	Protein transport protein Sec31A	3764870	3655900	3855040	3351090	3496020	3762670
Q92734;Q92734-2	Q92734;C9JJP5;C9JTY3;C9JUE0;Q92734-2;Q92734-3;Q92734-4	TFG-2_HUMAN;TFG_HUMAN	TFG	Protein TFG	3952300	4144130	3499550	4099920	4156580	4057010
O43617	O43617;A0A087WWM0;A0A087WYS5;O43617-2	TPPC3_HUMAN	TRAPPC3	Trafficking protein particle complex subunit 3	3640420	3958080	4115710	3748400	3907140	4252190
O00148	O00148;A0A0D9SEM9;K7EQN7;O00148-2;O00148-3	DX39A_HUMAN	DDX39A	ATP-dependent RNA helicase DDX39A	4022080	4311000	3978040	4210160	3711570	3686700
P11216	P06737;P11216;P11217;E9PK47;P06737-2;P11217-2	PYGB_HUMAN	PYGB	Glycogen phosphorylase, brain form	3341170	3471610	4042910	3630310	3571800	4296820
P61081	P61081;M0QYI6	UBC12_HUMAN	UBE2M	NEDD8-conjugating enzyme Ubc12	4112010	3282260	3619270	3861590	3977880	4274440
P04181	P04181	OAT_HUMAN	OAT	Ornithine aminotransferase, mitochondrial	4823130	3265260	2942920	3824310	4589640	4003980
P61326;Q96A72	P61326;Q96A72;F5H6N1;P61326-2	MGN2_HUMAN;MGN_HUMAN	MAGOH;MAGOHB	Protein mago nashi homolog	3768580	4110450	4129300	4013280	3334780	3743250
P61923;P61923-4	P61923;F8VUC5;F8VVA7;F8VXB1;F8VXR1;F8VYZ4;F8W156;P61923-4;P61923-5	COPZ1-4_HUMAN;COPZ1_HUMAN	COPZ1	Coatomer subunit zeta-1	3636490	3784980	3979990	3693410	3465360	3746770
P55795	P55795	HNRH2_HUMAN	HNRNPH2	Heterogeneous nuclear ribonucleoprotein H2	3619290	3848120	3819720	4020360	3506530	3923900
O00571	O00571;O15523;A0A0D9SF53;A0A0D9SFB3;A0A0D9SG12;A0A2R8Y4A4;A0A2R8Y4D2;A0A2R8Y5G6;A0A2R8Y645;A0A2R8Y7T2;A0A2R8YCW1;A0A2R8YDH3;A0A2R8YDT5;A0A2R8YF78;A0A2R8YFR4;A0A2R8YFS5;A0A2U3TZJ9;C9J081;C9J8G5;F6S8Q4;O00571-2;O15523-2;O15523-3	DDX3X_HUMAN	DDX3X	ATP-dependent RNA helicase DDX3X	3782740	3220280	3863480	4140390	3582310	4045680
O60925	O60925	PFD1_HUMAN	PFDN1	Prefoldin subunit 1	3950800	3906130	3578250	4060010	4139280	3853900
Q7LBR1	Q7LBR1	CHM1B_HUMAN	CHMP1B	Charged multivesicular body protein 1b	3945760	3379860	3844070	3287870	3393120	4300920
Q9Y277	Q9Y277;E5RFP6;E5RHE1;E5RHZ6;E5RJN6;E5RK27;Q9Y277-2	VDAC3_HUMAN	VDAC3	Voltage-dependent anion-selective channel protein 3	2931670	3429110	3597390	3664450	3586610	3402230
Q9HB07	Q9HB07;F8VR84	MYG1_HUMAN	C12orf10	UPF0160 protein MYG1, mitochondrial	3834330	3617500	3569840	3932770	3970110	3989910
Q93008;Q93008-1	O00507;Q93008;O00507-2;Q93008-1	USP9X-1_HUMAN;USP9X_HUMAN	USP9X	Probable ubiquitin carboxyl-terminal hydrolase FAF-X	4184200	4155510	3556730	3632340	3730310	3627340
P55786	A6NEC2;P55786;E9PLK3;E9PP11;P55786-2	PSA_HUMAN	NPEPPS	Puromycin-sensitive aminopeptidase	3658870	3654740	3797270	3423700	3648950	3896320
Q16630-2	Q16630;F8WJN3;Q16630-2;Q16630-3	CPSF6-2_HUMAN	CPSF6	Isoform of Q16630, Isoform 2 of Cleavage and polyadenylation specificity factor subunit 6	4024850	4261700	3693520	3598500	3651000	3824280
P30043	P30043;A0A2R8YEP4	BLVRB_HUMAN	BLVRB	Flavin reductase (NADPH)	3865140	4083380	3498800	3369930	3308900	4083750
O95218;O95218-2	O95218;O95218-2	ZRAB2-2_HUMAN;ZRAB2_HUMAN	ZRANB2	Zinc finger Ran-binding domain-containing protein 2	3947740	3943340	3504460	4019810	4191900	4427840
P62333	P62333;A0A087X2I1;H0YJC0;H0YJS8	PRS10_HUMAN	PSMC6	26S proteasome regulatory subunit 10B	3523610	3553240	3537160	3901070	3667610	3614460
P61086	P61086;D6RDM7;P61086-3	UBE2K_HUMAN	UBE2K	Ubiquitin-conjugating enzyme E2 K	4020390	4202850	3905830	4067130	4241330	3700980
Q9P1F3	Q9P1F3;Q5SZC9	ABRAL_HUMAN	ABRACL	Costars family protein ABRACL	3427720	3125420	3785620	3336880	3546220	3427230
Q53EL6;Q53EL6-2	Q53EL6;Q53EL6-2;Q5VZS7	PDCD4-2_HUMAN;PDCD4_HUMAN	PDCD4	Programmed cell death protein 4	3679360	4186830	4329400	3585550	4297610	3901240
Q9Y2V2	Q9Y2V2;H3BNU9;H3BPY5;H3BSW7;H3BTK3;H3BUY4;I3L3X8	CHSP1_HUMAN	CARHSP1	Calcium-regulated heat-stable protein 1	4145890	4242370	3656400	3932520	4530160	3561640
Q13363;Q13363-2	P56545;Q13363;A0A087WYL1;D6RAX2;E7EPF8;E7ESU7;P56545-2;P56545-3;Q13363-2;Q5SQP8	CTBP1-2_HUMAN;CTBP1_HUMAN	CTBP1	C-terminal-binding protein 1	4276720	3968410	3920570	3854550	3761270	4254250
P25205;P25205-2	P25205;J3KQ69;P25205-2	MCM3-2_HUMAN;MCM3_HUMAN	MCM3	DNA replication licensing factor MCM3	3133750	4034350	3151310	4266250	4033060	3548100
O75874	O75874	IDHC_HUMAN	IDH1	Isocitrate dehydrogenase [NADP] cytoplasmic	4482950	3679490	3533660	2848190	3585870	4066530
O14561	O14561;I3L505	ACPM_HUMAN	NDUFAB1	Acyl carrier protein, mitochondrial	3548470	4177640	4151450	4650580	4307370	4784940
Q13277;Q13277-2;Q13277-3	Q13277;A0A0C4DGE4;A0A0J9YW33;A0A286YF28;Q13277-2;Q13277-3	STX3-2_HUMAN;STX3-3_HUMAN;STX3_HUMAN	STX3	Syntaxin-3	3273190	3012610	3599810	3446540	3922550	3470880
P55036	P55036;H0Y3Y9;P55036-2;Q5VWC4	PSMD4_HUMAN	PSMD4	26S proteasome non-ATPase regulatory subunit 4	3320390	3530010	3793120	3746470	3686560	3367630
P52209;P52209-2	P52209;K7EM49;K7EMN2;K7EPF6;P52209-2	6PGD-2_HUMAN;6PGD_HUMAN	PGD	6-phosphogluconate dehydrogenase, decarboxylating	3779870	4056450	3553160	3020910	4187850	3139330
P62314	P62314;J3QLI9	SMD1_HUMAN	SNRPD1	Small nuclear ribonucleoprotein Sm D1	3477520	3265530	2721360	3682590	4329560	3408700
P10144	P10144;J3KPK2;J3KQ52;Q6XGZ2	GRAB_HUMAN	GZMB	Granzyme B	771755	553472	2313820	9645420	1869870	3366140
Q9UHD1	Q9UHD1;E9PHZ2;Q9UHD1-2	CHRD1_HUMAN	CHORDC1	Cysteine and histidine-rich domain-containing protein 1	3808870	3791800	3516900	4365170	3439660	3844060
P55010	P55010	IF5_HUMAN	EIF5	Eukaryotic translation initiation factor 5	3992960	3573410	3700720	4021510	3684950	3886190
P33240;P33240-2	P33240;Q9H0L4;E7EWR4;E9PID8;P33240-2	CSTF2-2_HUMAN;CSTF2_HUMAN	CSTF2	Cleavage stimulation factor subunit 2	3997600	3743880	3313090	3714220	3480890	4067190
P63313	P63313	TYB10_HUMAN	TMSB10	Thymosin beta-10	2907350	3474320	3631880	3965670	3238790	3112290
P48556	P48556;K7EJC1;K7EJR3;K7ERW6;R4GMR5	PSMD8_HUMAN	PSMD8	26S proteasome non-ATPase regulatory subunit 8	3654140	3587110	4038680	3769350	3446460	3826820
Q9NR31	Q9NR31;H0Y5E8;Q9NR31-2	SAR1A_HUMAN	SAR1A	GTP-binding protein SAR1a	4540930	4341100	4137040	3610810	3951200	3593930
Q9UPN7	Q9UPN7	PP6R1_HUMAN	PPP6R1	Serine/threonine-protein phosphatase 6 regulatory subunit 1	3811150	4034380	3600000	4045550	3938940	3918000
P09669	P09669	COX6C_HUMAN	COX6C	Cytochrome c oxidase subunit 6C	3233220	2961010	3263480	3936430	3786750	4004960
P42331-4	P42331;C9JB56;H7C4P1;P42331-2;P42331-3;P42331-4;P42331-5;P42331-6	RHG25-4_HUMAN	ARHGAP25	Isoform of P42331, Isoform 4 of Rho GTPase-activating protein 25	3530980	3572720	4278170	3885620	2760140	3762710
Q12904;Q12904-2	Q12904;Q12904-2	AIMP1-2_HUMAN;AIMP1_HUMAN	AIMP1	Aminoacyl tRNA synthase complex-interacting multifunctional protein 1	3830440	3653340	3336800	3455270	3557280	3209800
P62829	P62829;C9JD32;J3KT29;J3KTJ3;J3QQT9	RL23_HUMAN	RPL23	60S ribosomal protein L23	3077770	3000970	3039140	3892980	4534880	3370880
P20292	P20292;A0A087WW23	AL5AP_HUMAN	ALOX5AP	Arachidonate 5-lipoxygenase-activating protein	2950560	3179890	3375250	3003230	3034750	3446780
Q9UBR2	Q9UBR2	CATZ_HUMAN	CTSZ	Cathepsin Z	3133790	3811270	4208650	3786470	3643250	3450980
O60220	O60220	TIM8A_HUMAN	TIMM8A	Mitochondrial import inner membrane translocase subunit Tim8 A	3321250	3679520	3927470	4186660	4345580	4221520
P27707	P27707;D6RCP9;D6RFG8	DCK_HUMAN	DCK	Deoxycytidine kinase	4015800	4219840	3447080	3711460	3996710	3390740
P67870	P67870;A0A0G2JM12;N0E472;Q5SRQ3;Q5SRQ6	CSK2B_HUMAN	CSNK2B	Casein kinase II subunit beta	4097390	3807870	3432720	3999440	3129070	3761250
Q96CV9	Q96CV9;H7C1H4;Q96CV9-3	OPTN_HUMAN	OPTN	Optineurin	3599110	3419700	4230260	3878120	3281700	4133150
P23368	P23368;A0A1W2PPH1;A0A1W2PPY2;A0A1W2PQ37;A0A1W2PQF8;A0A1W2PQH3;A0A1W2PQH4;A0A1W2PQT3;A0A1W2PQY8;A0A1W2PR68;A0A1W2PRS2;A0A1W2PRY9;P23368-2	MAOM_HUMAN	ME2	NAD-dependent malic enzyme, mitochondrial	3043960	3196190	3222090	3274410	3992850	3718350
Q6UN15-3	Q6UN15;Q6UN15-3;Q6UN15-4;Q6UN15-5;A0A0B4J203	FIP1-3_HUMAN	FIP1L1	Isoform of Q6UN15, Isoform 3 of Pre-mRNA 3'-end-processing factor FIP1	3645330	3962580	3409280	3734900	3480770	3631540
P05455	P05455	LA_HUMAN	SSB	Lupus La protein	3284730	3431280	3840880	3551480	3536240	3866910
Q9ULC4;Q9ULC4-3	A0A3B3IRV3;Q9ULC4;Q9ULC4-2;Q9ULC4-3	MCTS1-3_HUMAN;MCTS1_HUMAN	MCTS1	Malignant T-cell-amplified sequence 1	3720530	3661600	3127850	3465650	3595240	3637020
Q9GZS3	Q9GZS3;H0YL19;H0YMF9;H0YN81;H3BQA8	WDR61_HUMAN	WDR61	WD repeat-containing protein 61	3670950	3750450	3388160	3786950	3898630	4040740
Q9Y2B0	F8VP03;F8W031;F8W1U5;Q9Y2B0;F8VXJ7;H0YIH9;Q9Y2B0-2	CNPY2_HUMAN	CNPY2	Protein canopy homolog 2	3356530	3635410	3471760	4327010	4585390	4088150
Q92597	Q92597;E5RJY1;E7ESM1;Q92597-2;Q92597-3	NDRG1_HUMAN	NDRG1	Protein NDRG1	3532530	3652900	4053650	3785900	3712740	3721320
P55145	P55145;A8K878	MANF_HUMAN	MANF	Mesencephalic astrocyte-derived neurotrophic factor	3582880	2921240	3210300	3205230	3712090	2092070
P18206;P18206-2	P18206;P18206-2	VINC-2_HUMAN;VINC_HUMAN	VCL	Vinculin	4322200	3499600	3884720	2963550	2885370	3147940
O95466-2	O95466;A0A0A0MR62;K7EJE6;K7EK60;O95466-2;O95466-3	FMNL1-2_HUMAN	FMNL1	Isoform of O95466, Isoform 2 of Formin-like protein 1	3430540	3644820	4263900	3875590	3483680	3019370
P49821;P49821-2	P49821;B4DE93;E9PJL9;E9PLC6;E9PMX3;E9PPD6;E9PPR0;E9PQP1;G3V0I5;P49821-2	NDUV1-2_HUMAN;NDUV1_HUMAN	NDUFV1	NADH dehydrogenase [ubiquinone] flavoprotein 1, mitochondrial	3120650	3441640	3445350	3329600	3572180	3817570
Q9BQA1	Q9BQA1;Q9BQA1-2	MEP50_HUMAN	WDR77	Methylosome protein 50	3771370	3879380	2930630	3800230	4207990	3943590
Q9P258	Q9P258	RCC2_HUMAN	RCC2	Protein RCC2	3390290	3467360	3084700	3223940	3952430	3381840
O15117;O15117-2;O15117-3	O15117;D6RAE8;D6RC38;D6RER7;D6RFJ5;O15117-2;O15117-3	FYB1-2_HUMAN;FYB1-3_HUMAN;FYB1_HUMAN	FYB1	FYN-binding protein 1	3877740	4052760	3572220	3352400	3714530	3526380
O95299	O95299;A0A087WXC5;E7ESZ7	NDUAA_HUMAN	NDUFA10	NADH dehydrogenase [ubiquinone] 1 alpha subcomplex subunit 10, mitochondrial	3356040	3858170	3583850	3421860	3514580	3733970
Q16775	Q16775;H3BPK3;H3BPQ4;H3BV79;Q16775-2	GLO2_HUMAN	HAGH	Hydroxyacylglutathione hydrolase, mitochondrial	2892770	3764180	3585780	3437820	3759770	3541860
P11279	P11279;P11279-2	LAMP1_HUMAN	LAMP1	Lysosome-associated membrane glycoprotein 1	3545000	3094030	4050300	3028520	2289620	3834620
Q86X83;Q86X83-2	Q86X83;F8WBW1;Q86X83-2	COMD2-2_HUMAN;COMD2_HUMAN	COMMD2	COMM domain-containing protein 2	3890470	3534730	3574480	3526240	3315380	3957560
Q16644	Q16644;C9J8E1;C9JPW3	MAPK3_HUMAN	MAPKAPK3	MAP kinase-activated protein kinase 3	3413240	3185880	3372790	3222230	3851000	3698070
O60493	O60493;O60493-3;O60493-4	SNX3_HUMAN	SNX3	Sorting nexin-3	3749820	3561250	3430150	3252620	2839010	3852360
A6NI56;A6NI56-2	A6NI56;A6NI56-2;B7ZBA8;H3BS06	CC154-2_HUMAN;CC154_HUMAN	CCDC154	Coiled-coil domain-containing protein 154	3761460	3461770	3604780	2967500	3119500	3704910
Q16539	Q16539;B5TY33;H7C4E2;Q16539-2;Q16539-3;Q16539-4;Q16539-5	MK14_HUMAN	MAPK14	Mitogen-activated protein kinase 14	3396430	3595360	3739020	3499650	3368970	3573240
P01892	Q31612;Q95604;A0A140T913;A0A140T921;A0A140T933;A0A140T955;A0A140T9H5;A0A140T9I0;A0A140T9U8;A0A140T9X5;A0A1W2PPQ2;A0A1W2PRT9;A0A1W2PRU9;A2AEA2;O19617;P01892;P10316;P10321	1A02_HUMAN	HLA-A	Isoform of P01891, HLA class I histocompatibility antigen, A-2 alpha chain	805232	7448110	5090930	881442	6604160	659446
P04040	P04040	CATA_HUMAN	CAT	Catalase	3232160	4564730	4215300	3051270	3679380	3702180
Q9Y5P6;Q9Y5P6-2	Q9Y5P6;Q9Y5P6-2	GMPPB-2_HUMAN;GMPPB_HUMAN	GMPPB	Mannose-1-phosphate guanyltransferase beta	3712160	3628300	3621820	3680070	3365930	3760350
P08708	P08708;A0A075B716;H0YN73;H0YN88;H3BNC9	RS17_HUMAN	RPS17	40S ribosomal protein S17	2989790	3262980	3172530	3984100	4458290	3431780
Q13287	Q13287	NMI_HUMAN	NMI	N-myc-interactor	2750620	3986070	3261310	4859300	2601690	3731420
P51970	P51970	NDUA8_HUMAN	NDUFA8	NADH dehydrogenase [ubiquinone] 1 alpha subcomplex subunit 8	3752650	4030790	3532270	3545860	3702430	3895060
Q8NFH4	Q8NFH4;F8VTY2	NUP37_HUMAN	NUP37	Nucleoporin Nup37	3215500	3776770	3445110	3668080	3674420	3870200
Q9UI12;Q9UI12-2	Q9UI12;G3V126;Q9UI12-2	VATH-2_HUMAN;VATH_HUMAN	ATP6V1H	V-type proton ATPase subunit H	3596520	3999520	3398900	3269000	3397510	3416710
P47224	P47224	MSS4_HUMAN	RABIF	Guanine nucleotide exchange factor MSS4	4001330	3516610	3813140	4148810	2617180	4056790
P26640	P26640;A0A0G2JJT9;A0A140T954;A2ABF4	SYVC_HUMAN	VARS	Valine--tRNA ligase	3247320	3320440	3640440	3487550	3905250	3091270
Q8TBC4	Q8TBC4;F8WF86;Q8TBC4-2	UBA3_HUMAN	UBA3	NEDD8-activating enzyme E1 catalytic subunit	3412090	3304620	3618020	3740470	3765260	3377720
Q13952;Q13952-3	Q13952;Q13952-3	NFYC-3_HUMAN;NFYC_HUMAN	NFYC	Nuclear transcription factor Y subunit gamma	3951090	3718310	3542990	3308180	3445680	3992190
Q6NYC8	Q6NYC8;A0A0G2JHC2;Q6NYC8-3;Q6NYC8-4	PPR18_HUMAN	PPP1R18	Phostensin	3792470	3366220	4145670	3859380	3010070	3241050
Q9Y3D6	Q9Y3D6	FIS1_HUMAN	FIS1	Mitochondrial fission 1 protein	3157870	3175540	3672710	3272090	3980270	3613790
Q9HDC9	Q9HDC9;H0Y512	APMAP_HUMAN	APMAP	Adipocyte plasma membrane-associated protein	3357260	3375590	3226160	4019830	4341640	3746520
Q96JY6;Q96JY6-5	Q96JY6;A0A087WVI1;B3KPU0;Q96JY6-5	PDLI2-5_HUMAN;PDLI2_HUMAN	PDLIM2	PDZ and LIM domain protein 2	4162120	3906990	4173440	3164370	3278600	3503620
Q8WVJ2	Q8WVJ2;E5RFP0	NUDC2_HUMAN	NUDCD2	NudC domain-containing protein 2	3319800	3327430	3423040	3898250	4136810	3556240
Q99417	Q99417;A0A087WV05	MYCBP_HUMAN	MYCBP	c-Myc-binding protein	3660990	3972310	3549540	3923480	3844350	3777280
Q9NQR4	Q9NQR4;F8WF70;H7C579	NIT2_HUMAN	NIT2	Omega-amidase NIT2	3473060	3714690	3196690	2377400	3984250	3957820
Q9H0W9;Q9H0W9-2	Q9H0W9;A0A087WT99;E9PJU8;E9PPB5;E9PQS1;Q9H0W9-2;Q9H0W9-3;Q9H0W9-4;A0A1W2PRB8	CK054-2_HUMAN;CK054_HUMAN	C11orf54	Ester hydrolase C11orf54	2925000	3277950	2762650	3853120	3496260	4088660
P53992	P53992;G5EA31	SC24C_HUMAN	SEC24C	Protein transport protein Sec24C	3463460	3561880	3723500	3323760	3613630	3465450
Q96M27	Q96M27;Q96M27-2;Q96M27-3	PRRC1_HUMAN	PRRC1	Protein PRRC1	4130070	3689370	3406990	3164770	3049060	3488700
P04234	P04234;E9PMT5;H0YE18;P04234-2	CD3D_HUMAN	CD3D	T-cell surface glycoprotein CD3 delta chain	2906060	3590760	3632130	4086720	4101160	3838630
Q86U42;Q86U42-2;Q92843-2	A6NDY0;Q86U42;A6NDY0-2;A6NDY0-4;B4DEH8;G3V4T2;Q86U42-2;Q92843-2	B2CL2-2_HUMAN;PABP2-2_HUMAN;PABP2_HUMAN	BCL2L2;PABPN1	Polyadenylate-binding protein 2	3123770	3512140	3411510	3856220	4297550	3639820
Q92890;Q92890-1	Q92890;C9JNP9;Q92890-1;Q92890-3	UFD1-1_HUMAN;UFD1_HUMAN	UFD1	Ubiquitin recognition factor in ER-associated degradation protein 1	3139190	3264540	3344710	3413630	3143140	3329450
P30520	P30520	PURA2_HUMAN	ADSS	Adenylosuccinate synthetase isozyme 2	3584880	3647300	3581360	3390570	3196040	3829990
P07954;P07954-2	P07954;P07954-2	FUMH-2_HUMAN;FUMH_HUMAN	FH	Fumarate hydratase, mitochondrial	3532600	3480000	2941460	3380850	3580310	3603440
Q15369	Q15369;E5RHG8;Q15369-2	ELOC_HUMAN	ELOC	Elongin-C	3414010	3302940	3525600	3834810	3684120	3446290
P36871	P36871;A0A3B3ITK7;P36871-2;P36871-3	PGM1_HUMAN	PGM1	Phosphoglucomutase-1	2997150	3289080	3404710	2715100	4090560	3473910
Q13596	O60749;Q13596;H0YK42;O60749-2;Q13596-2	SNX1_HUMAN	SNX1	Sorting nexin-1	3576320	3972440	3698610	3694920	2790660	3675830
P42025	P42025	ACTY_HUMAN	ACTR1B	Beta-centractin	3410790	3145370	3479400	3377800	3262950	3694840
Q13547	Q13547;Q5TEE2	HDAC1_HUMAN	HDAC1	Histone deacetylase 1	3805120	3638110	3308940	3525480	3284820	3506290
Q9NX63	Q9NX63;A0A286YEX5;C9JRZ6;F8WAR4	MIC19_HUMAN	CHCHD3	MICOS complex subunit MIC19	3310480	3722470	3387940	3255230	3042540	3526250
Q9BWD1	Q9BWD1;Q9BWD1-2	THIC_HUMAN	ACAT2	Acetyl-CoA acetyltransferase, cytosolic	3805610	3629840	3338690	2956130	3919060	3318350
O00232	O00232;O00232-2	PSD12_HUMAN	PSMD12	26S proteasome non-ATPase regulatory subunit 12	3384020	3437390	3695290	3569350	3363720	3167790
P61916	P61916;E7EMS2;G3V2V8;G3V3D1;G3V3E8;H0YIZ1;J3KMY5;P61916-2	NPC2_HUMAN	NPC2	NPC intracellular cholesterol transporter 2	3478840	3518330	4783960	2966780	2354330	2874860
P45954	P45954;P45954-2	ACDSB_HUMAN	ACADSB	Short/branched chain specific acyl-CoA dehydrogenase, mitochondrial	3498390	3415250	3421020	3294920	3344110	3447550
P62633-2	P62633;P62633-2;P62633-3;P62633-4;P62633-5;P62633-6;P62633-7;P62633-8	CNBP-2_HUMAN	CNBP	Isoform of P62633, Isoform 2 of Cellular nucleic acid-binding protein	3732870	3847420	3365600	3868640	3198670	3999860
Q9Y4Z0	Q9Y4Z0;M0QXB0;V9GZ56	LSM4_HUMAN	LSM4	U6 snRNA-associated Sm-like protein LSm4	2750230	2858810	3327870	3187670	4034320	3348520
Q5JSL3	Q5JSL3;A0A0J9YW64;A6NIW2	DOC11_HUMAN	DOCK11	Dedicator of cytokinesis protein 11	3133660	3604440	4088680	2965610	3418330	2931400
P11310;P11310-2	P11310;B7Z9I1;H0YDT5;P11310-2;Q5T4U5	ACADM-2_HUMAN;ACADM_HUMAN	ACADM	Medium-chain specific acyl-CoA dehydrogenase, mitochondrial	2888720	3694320	2507590	3653740	3843170	3868240
Q8IUI8	Q8IUI8;Q8IUI8-2	CRLF3_HUMAN	CRLF3	Cytokine receptor-like factor 3	2973680	3890150	3381810	3512890	3515880	3656010
P55735;P55735-2;P55735-3;P55735-4	P55735;A8MXL6;E7ERC8;P55735-2;P55735-3;P55735-4	SEC13-2_HUMAN;SEC13-3_HUMAN;SEC13-4_HUMAN;SEC13_HUMAN	SEC13	Protein SEC13 homolog	3117270	3682540	3418270	3713050	3759740	3599370
P06132	P06132;A0A1B0GVN9;A0A1B0GVZ4;A0A494BZY8;A0A494C085;A0A494C0Q8;A0A494C0S8;Q5T446	DCUP_HUMAN	UROD	Uroporphyrinogen decarboxylase	3639270	3489300	3045720	3386270	3511890	3091960
Q96QR8	Q96QR8	PURB_HUMAN	PURB	Transcriptional activator protein Pur-beta	3081630	3174210	3329570	3501870	3285330	3660260
Q14161	Q14161;F8VXI9;F8W822;F8WAK2;Q14161-10;Q14161-11;Q14161-2;Q14161-3;Q14161-4;Q14161-5;Q14161-6;Q14161-7;Q14161-8;Q14161-9;R4GNG3	GIT2_HUMAN	GIT2	ARF GTPase-activating protein GIT2	3419460	3467220	3423280	3353160	3142850	3232570
P62877	P62877	RBX1_HUMAN	RBX1	E3 ubiquitin-protein ligase RBX1	3352700	3285930	2857130	3860360	3486770	3383540
P54136	P54136;P54136-2	SYRC_HUMAN	RARS	Arginine--tRNA ligase, cytoplasmic	3456320	3510200	3351320	3296550	3367150	3111570
Q9Y5Z4	Q9Y5Z4;C9IZA0;Q5THN1;Q9Y5Z4-2	HEBP2_HUMAN	HEBP2	Heme-binding protein 2	3916690	2512780	3869810	3990100	3601920	2733730
Q9NS69	Q9NS69	TOM22_HUMAN	TOMM22	Mitochondrial import receptor subunit TOM22 homolog	3068280	3721870	3488010	4071550	3843790	3367330
Q04637-8	Q04637;C9J6B6;C9JF13;C9K073;E7EUU4;E7EX73;E9PGM1;Q04637-3;Q04637-4;Q04637-5;Q04637-6;Q04637-7;Q04637-8;Q04637-9	IF4G1-8_HUMAN	EIF4G1	Isoform of Q04637, Isoform 8 of Eukaryotic translation initiation factor 4 gamma 1	3014620	3235340	3959540	3900180	3375570	3215310
P42285	P42285	MTREX_HUMAN	MTREX	Exosome RNA helicase MTR4	3295920	3424280	3611230	3157270	3164200	3060620
Q01543	Q01543;Q01543-2;Q01543-3;V9GY62	FLI1_HUMAN	FLI1	Friend leukemia integration 1 transcription factor	3304630	3615710	3399480	3207360	3155760	3243380
Q7Z4W1	Q7Z4W1;J3KS22;J3QL34;J3QRQ2;J3QS36	DCXR_HUMAN	DCXR	L-xylulose reductase	3499940	3204330	3166630	2667260	3034990	3939060
O14974-4	O14974;H0YIM2;H0YIS3;O14974-2;O14974-3;O14974-4;O14974-5	MYPT1-4_HUMAN	PPP1R12A	Isoform of O14974, Isoform 4 of Protein phosphatase 1 regulatory subunit 12A	3487590	3441600	3487810	3381450	3150630	3597020
P22695	P22695;A0A087WVZ4;H3BP04;H3BRG4;H3BSJ9;H3BUE4;H3BUI9	QCR2_HUMAN	UQCRC2	Cytochrome b-c1 complex subunit 2, mitochondrial	3245250	3035050	3135080	3447300	3081460	3499420
P61225	P10114;P61225;Q9Y3L5;F6U784	RAP2B_HUMAN	RAP2B	Ras-related protein Rap-2b	3187880	2897110	3599530	3463420	2769020	3198310
Q13564;Q13564-2;Q13564-4	Q13564;J3KTE3;J3QLH4;Q13564-2;Q13564-3;Q13564-4	ULA1-2_HUMAN;ULA1-4_HUMAN;ULA1_HUMAN	NAE1	NEDD8-activating enzyme E1 regulatory subunit	3393360	3023060	3559680	3481430	3418640	3122140
Q9P2A4	Q9P2A4;I3L1X2;Q9P2A4-2	ABI3_HUMAN	ABI3	ABI gene family member 3	3660880	3213830	3626900	3387670	3794800	3592630
Q96I24	Q96I24;Q96I24-2	FUBP3_HUMAN	FUBP3	Far upstream element-binding protein 3	3639720	3450010	3008990	3176670	3216150	3552880
Q9NQ88	Q9NQ88;A0A0U1RQD1	TIGAR_HUMAN	TIGAR	Fructose-2,6-bisphosphatase TIGAR	3294540	2941300	3355770	2918160	2784620	2628020
O00217	O00217;E9PN51;E9PPW7;F8W9K7	NDUS8_HUMAN	NDUFS8	NADH dehydrogenase [ubiquinone] iron-sulfur protein 8, mitochondrial	3041210	3530270	3359160	3465100	3841820	3968040
Q96FS4	Q96FS4	SIPA1_HUMAN	SIPA1	Signal-induced proliferation-associated protein 1	3573340	3418320	3421150	3283410	3254560	3024920
Q02818	Q02818;C9J3C1;C9JBD3;C9JKZ2;H7BZI1	NUCB1_HUMAN	NUCB1	Nucleobindin-1	3030580	3040500	3404360	4301750	2527760	4453500
P17858-2	P08237;P17858;A0A2R8Y891;P08237-3;P17858-2	PFKAL-2_HUMAN	PFKL	Isoform of P17858, Isoform 2 of ATP-dependent 6-phosphofructokinase, liver type	2759860	3532290	3493370	3372160	3469330	3072440
P25098	P25098;P35626	ARBK1_HUMAN	GRK2	Beta-adrenergic receptor kinase 1	3127370	2983810	3465830	3120500	3414930	2916360
O43768;O43768-2;O43768-3;O43768-4;O43768-9	O43768;A0A1W2PRU0;A6NMQ3;O43768-2;O43768-3;O43768-4;O43768-5;O43768-6;O43768-7;O43768-8;O43768-9;Q5T5H1	ENSA-2_HUMAN;ENSA-3_HUMAN;ENSA-4_HUMAN;ENSA-9_HUMAN;ENSA_HUMAN	ENSA	Alpha-endosulfine	3444770	3379200	3403210	3168650	3247640	2994820
P22694-2	P17612;P22694;A0A087WVC4;A0A0A0MS54;P17612-2;P22694-10;P22694-2;P22694-3;P22694-4;P22694-5;P22694-6;P22694-7;P22694-9	KAPCB-2_HUMAN	PRKACB	Isoform of P22694, Isoform 2 of cAMP-dependent protein kinase catalytic subunit beta	3098670	3364020	3575300	2946250	3311690	3027900
Q9BY43;Q9BY43-2	Q9BY43;H0YIN6;Q9BY43-2	CHM4A-2_HUMAN;CHM4A_HUMAN	CHMP4A	Charged multivesicular body protein 4a	2991770	3455280	3780850	3199300	3026430	3366180
Q13595;Q13595-3;Q13595-4	Q13595;Q13595-2;Q13595-3;Q13595-4	TRA2A-3_HUMAN;TRA2A-4_HUMAN;TRA2A_HUMAN	TRA2A	Transformer-2 protein homolog alpha	2778220	3224710	3276060	3583220	3146890	3576030
P29144	P29144;A0A494C0U1;A0A494C1B8;Q5VZU9	TPP2_HUMAN	TPP2	Tripeptidyl-peptidase 2	3586590	2696620	3136900	3244480	3496070	3407370
P17050	P17050	NAGAB_HUMAN	NAGA	Alpha-N-acetylgalactosaminidase	2995280	3061110	3827550	3367350	2632910	3318030
P20340-2	P20340;Q9H0N0;Q9NRW1;C9JU14;J3KR73;P20340-2;P20340-4;Q9NRW1-2	RAB6A-2_HUMAN	RAB6A	Isoform of P20340, Isoform 2 of Ras-related protein Rab-6A	3131320	3027040	3094000	3425150	3491730	3071620
Q9HC35	Q9HC35;B5MBZ0;Q9HC35-2	EMAL4_HUMAN	EML4	Echinoderm microtubule-associated protein-like 4	2686190	3372640	3954680	3208780	2710590	2698430
Q5VTR2	Q5VTR2;C9J0A5;C9JXC9	BRE1A_HUMAN	RNF20	E3 ubiquitin-protein ligase BRE1A	3049660	3039610	3070480	3320070	2877890	3159440
Q9BUH6	Q9BUH6	PAXX_HUMAN	PAXX	Protein PAXX	3854590	3105960	3284070	3079300	2705370	3462210
P27816	P27816;E7EVA0;P27816-2;P27816-6	MAP4_HUMAN	MAP4	Microtubule-associated protein 4	2593350	2660740	3666590	3309880	4213540	2651100
Q9UKX7;Q9UKX7-2	Q9UKX7;Q9UKX7-2	NUP50-2_HUMAN;NUP50_HUMAN	NUP50	Nuclear pore complex protein Nup50	3395430	3555520	2918400	3314850	2916240	3254120
Q15027	Q15027	ACAP1_HUMAN	ACAP1	Arf-GAP with coiled-coil, ANK repeat and PH domain-containing protein 1	3152920	3630270	3918990	3174330	3379850	2950160
Q9H773	Q9H773;H3BSA6	DCTP1_HUMAN	DCTPP1	dCTP pyrophosphatase 1	3293240	3891880	2900680	3825110	3845060	3054890
Q8IX12;Q8IX12-2	Q8IX12;A0A0C4DGG8;F5H1H2;F5H2E6;F5H3E1;Q8IX12-2	CCAR1-2_HUMAN;CCAR1_HUMAN	CCAR1	Cell division cycle and apoptosis regulator protein 1	3088300	3282160	3247860	3116200	3485550	3435800
Q8IX04;Q8IX04-2;Q8IX04-3;Q8IX04-6	Q8IX04;Q8IX04-2;Q8IX04-3;Q8IX04-4;Q8IX04-6;Q8IX04-7	UEVLD-2_HUMAN;UEVLD-3_HUMAN;UEVLD-6_HUMAN;UEVLD_HUMAN	UEVLD	Ubiquitin-conjugating enzyme E2 variant 3	3495320	3202370	2581150	3002610	3060070	3747180
P35237	P35237;A0A024QZX5;A0A087X1N8;A0A2R8YD12	SPB6_HUMAN	SERPINB6	Serpin B6	3490800	3239910	1944890	2814230	3750810	3673190
P07203	P07203;A0A087WUQ6;A0A2R8Y6B6	GPX1_HUMAN	GPX1	Glutathione peroxidase 1	2341580	3072920	2723330	3847760	3119420	4326250
P29350;P29350-3;P29350-4	P29350;P29350-2;P29350-3;P29350-4	PTN6-3_HUMAN;PTN6-4_HUMAN;PTN6_HUMAN	PTPN6	Tyrosine-protein phosphatase non-receptor type 6	3232350	3443450	3202040	2904330	3381110	3162610
Q96I99	Q96I99;E9PDQ8;H0Y852;Q96I99-2	SUCB2_HUMAN	SUCLG2	Succinate--CoA ligase [GDP-forming] subunit beta, mitochondrial	3257060	3026740	2929770	2972040	2714970	3470250
O14737	O14737;K7EQA1;O14737-2	PDCD5_HUMAN	PDCD5	Programmed cell death protein 5	3397250	3083660	3040070	3547120	3205920	3100270
O75822	O75822;O75822-2;O75822-3	EIF3J_HUMAN	EIF3J	Eukaryotic translation initiation factor 3 subunit J	3512200	3731660	3452860	3487660	3020300	3176290
P62140	P62140	PP1B_HUMAN	PPP1CB	Serine/threonine-protein phosphatase PP1-beta catalytic subunit	2994850	2970170	3159660	3286960	3050890	3355740
Q08J23	Q08J23;Q08J23-2;Q08J23-3	NSUN2_HUMAN	NSUN2	tRNA (cytosine(34)-C(5))-methyltransferase	2846760	2975170	3461610	3388480	3387930	3241150
P53680	P53680;M0QYZ2;M0R0N4;P53680-2;X6R390	AP2S1_HUMAN	AP2S1	AP-2 complex subunit sigma	3521620	3441260	3441960	3353870	2951960	2916130
Q9NY33	Q9NY33;E9PQ14;G3V180;G3V1D3;Q9NY33-4	DPP3_HUMAN	DPP3	Dipeptidyl peptidase 3	3470940	3383700	3506140	3354850	2612950	2958800
P51570;P51570-2	P51570;K7EII7;P51570-2	GALK1-2_HUMAN;GALK1_HUMAN	GALK1	Galactokinase	3396310	3196460	2991160	3029060	3724690	3262330
O75489	O75489	NDUS3_HUMAN	NDUFS3	NADH dehydrogenase [ubiquinone] iron-sulfur protein 3, mitochondrial	2892250	3327680	3225930	3066810	3024610	3888050
Q92608	Q92608;E5RFJ0;E7ERW7;F6S220;H0YB76;Q92608-2	DOCK2_HUMAN	DOCK2	Dedicator of cytokinesis protein 2	2979810	3492860	3878980	3224470	3290320	2580010
P61758	P61758;P61758-2	PFD3_HUMAN	VBP1	Prefoldin subunit 3	3291170	3119520	3175930	3059910	3065430	3183090
P21127;P21127-2;P21127-3;P21127-8	P21127;Q9UQ88;A0A0D9SEI3;A0A0D9SEN2;A0A0D9SER5;P21127-10;P21127-12;P21127-2;P21127-3;P21127-4;P21127-5;P21127-6;P21127-8;P21127-9;Q5QPR3;Q5QPR4;Q9UQ88-10;Q9UQ88-2;Q9UQ88-3;Q9UQ88-4;Q9UQ88-9	CD11B-2_HUMAN;CD11B-3_HUMAN;CD11B-8_HUMAN;CD11B_HUMAN	CDK11B	Cyclin-dependent kinase 11B	3569600	3502630	3151200	3255200	2985780	3975260
Q15833	Q15833;M0R1A1;Q15833-2;Q15833-3	STXB2_HUMAN	STXBP2	Syntaxin-binding protein 2	3488690	3564390	3714370	3086320	2990170	2909540
P49354	P49354;B3KVN2;E9PQP6;P49354-2	FNTA_HUMAN	FNTA	Protein farnesyltransferase/geranylgeranyltransferase type-1 subunit alpha	3277360	3331200	3121620	3177170	3187690	3379430
Q969G3;Q969G3-2	Q969G3;A0A2R8Y4T4;A0A2R8Y765;A0A2R8Y7I9;A0A2R8Y7U4;A0A2R8Y855;A0A2R8YD78;A0A2R8YES3;A0A2U3TZQ7;B4DGM3;J3KT85;J3QKS7;J3QR61;Q969G3-2;Q969G3-3;Q969G3-4;Q969G3-5;Q969G3-6	SMCE1-2_HUMAN;SMCE1_HUMAN	SMARCE1	SWI/SNF-related matrix-associated actin-dependent regulator of chromatin subfamily E member 1	3362290	3346490	3193490	3035190	3373790	3328770
P40763	P40763;K7EP08;P40763-2;P40763-3	STAT3_HUMAN	STAT3	Signal transducer and activator of transcription 3	2685300	3255170	3183800	3591090	3061600	3108100
Q9HBI0	Q9HBI0;Q9HBI0-2;Q9HBI0-3;Q9HBI0-4;Q9HBI0-5	PARVG_HUMAN	PARVG	Gamma-parvin	3526130	3350600	3209550	3251460	2925820	3316280
P07814	P07814	SYEP_HUMAN	EPRS	Bifunctional glutamate/proline--tRNA ligase	2610850	2848620	3254220	3062420	3320440	2712580
P09874	P09874	PARP1_HUMAN	PARP1	Poly [ADP-ribose] polymerase 1	2262490	2329540	2987070	2805720	3973970	2798700
Q96QK1	Q96QK1	VPS35_HUMAN	VPS35	Vacuolar protein sorting-associated protein 35	3193830	3361340	3328160	3208220	3148530	2994470
P61163	P61163;A0A1B0GVS3;R4GMT0	ACTZ_HUMAN	ACTR1A	Alpha-centractin	3177990	3467100	3225270	2861480	3162290	3220550
P33992	P33992;B1AHB1	MCM5_HUMAN	MCM5	DNA replication licensing factor MCM5	2609990	3216310	2593360	3864670	4017920	2905100
Q9Y5S9	Q9Y5S9;Q9Y5S9-2	RBM8A_HUMAN	RBM8A	RNA-binding protein 8A	3193250	3360010	3315170	3375210	3159690	3465920
P43307	P43307;A0A3B3IRT8;C9IZQ1;C9J3L8;C9J5W0;E9PAL7;P43307-2	SSRA_HUMAN	SSR1	Translocon-associated protein subunit alpha	3420690	3124140	2907740	3589190	3578380	3276450
Q8N1F7	Q8N1F7;Q8N1F7-2	NUP93_HUMAN	NUP93	Nuclear pore complex protein Nup93	3389920	3347620	3193270	3250860	3183150	3006180
Q8TD19	Q8TD19	NEK9_HUMAN	NEK9	Serine/threonine-protein kinase Nek9	3169120	3535270	3160890	2916260	3177280	3146250
O60506;O60506-3	O60506;B7Z645;F6UXX1;O60506-2;O60506-3;O60506-4	HNRPQ-3_HUMAN;HNRPQ_HUMAN	SYNCRIP	Heterogeneous nuclear ribonucleoprotein Q	2178070	2428710	3211310	3497570	4043940	2938130
P11233	P11233;H7C3P7	RALA_HUMAN	RALA	Ras-related protein Ral-A	3013490	2816860	3273020	3002470	2891140	3202610
P27824;P27824-2	P27824;D6RAQ8;D6RAU8;D6RB85;D6RD16;D6RDP7;D6RHJ3;P27824-2	CALX-2_HUMAN;CALX_HUMAN	CANX	Calnexin	2283790	2114070	2364540	3554980	4815390	2741980
Q86WV1;Q86WV1-2	Q86WV1;J3QRG3;Q86WV1-2	SKAP1-2_HUMAN;SKAP1_HUMAN	SKAP1	Src kinase-associated phosphoprotein 1	3530490	3688490	3157780	2827570	3291250	3342550
Q15428	Q15428	SF3A2_HUMAN	SF3A2	Splicing factor 3A subunit 2	2774440	3038250	3223160	3126510	3471940	3241200
P62312	P62312	LSM6_HUMAN	LSM6	U6 snRNA-associated Sm-like protein LSm6	3122710	2430960	2540040	2550910	2764780	3328800
P39656	P39656;A0A0C4DGS1;P39656-2;P39656-3	OST48_HUMAN	DDOST	Dolichyl-diphosphooligosaccharide--protein glycosyltransferase 48 kDa subunit	3001400	2901640	2887580	2981900	3528860	2365920
Q86V81	Q86V81;E9PB61	THOC4_HUMAN	ALYREF	THO complex subunit 4	2460960	2432710	2670940	2910880	3371350	2319540
O00743	O00743;O00743-2	PPP6_HUMAN	PPP6C	Serine/threonine-protein phosphatase 6 catalytic subunit	3420060	3182120	2912010	3150680	2935430	3355840
P47897	P47897;A0A0U1RQE9;A0A0U1RQM8;A0A0U1RQT0;A0A0U1RRI9;A0A1B0GVU9;C9J165;P47897-2	SYQ_HUMAN	QARS	Glutamine--tRNA ligase	3111420	3262210	3228840	3220410	3276620	2823890
P18754;P18754-2	P18754;C9J3R0;C9JMJ4;C9JQZ4;C9JRH2;C9JW69;P18754-2	RCC1-2_HUMAN;RCC1_HUMAN	RCC1	Regulator of chromosome condensation	2682830	2534810	3045730	3022570	3514620	2884790
Q9NX40	Q9NX40;D6R918;D6RA54;D6RBC5;D6RC55;D6RDI5;D6RF07;D6RG39;D6RIT9;Q9NX40-2;Q9NX40-3;Q9NX40-4	OCAD1_HUMAN	OCIAD1	OCIA domain-containing protein 1	2924630	3410980	2962570	3224970	2294770	2937870
O15382	O15382;B3KSI3;M0QXF9;M0QZ10;M0QZP4;O15382-2	BCAT2_HUMAN	BCAT2	Branched-chain-amino-acid aminotransferase, mitochondrial	2917130	2806930	3369050	2998050	2762770	2842930
P50897	P50897;A0A286YFE3;A0A286YFF7;A0A286YFL6;A0A286YFL8;A0A2C9F2P4;P50897-2;Q5T0S4	PPT1_HUMAN	PPT1	Palmitoyl-protein thioesterase 1	2716270	3421290	3601860	3362430	2243200	3196170
Q9NSD9	Q9NSD9	SYFB_HUMAN	FARSB	Phenylalanine--tRNA ligase beta subunit	3002560	2839260	2564380	2847680	3279400	3113540
P14209;P14209-3	P14209;A0A096LP69;P14209-3	CD99-3_HUMAN;CD99_HUMAN	CD99	CD99 antigen	3393360	3959720	4303850	3904000	2829270	3065750
Q68EM7;Q68EM7-2;Q68EM7-5;Q68EM7-6	Q68EM7;C9IZD3;I3L1S9;I3L4P0;Q68EM7-2;Q68EM7-4;Q68EM7-5;Q68EM7-6	RHG17-2_HUMAN;RHG17-5_HUMAN;RHG17-6_HUMAN;RHG17_HUMAN	ARHGAP17	Rho GTPase-activating protein 17	2665510	3132630	3159600	2923770	3133170	3218180
Q9Y333	Q9Y333	LSM2_HUMAN	LSM2	U6 snRNA-associated Sm-like protein LSm2	3180550	3179420	3165890	3233930	3249420	3377200
Q12979;Q12979-2;Q12979-4	Q12979;A0A0G2JQ41;A0A0G2JRJ1;A0A1C7CYZ0;I3L2P5;I3L3W0;Q12979-2;Q12979-4	ABR-2_HUMAN;ABR-4_HUMAN;ABR_HUMAN	ABR	Active breakpoint cluster region-related protein	2996600	2992050	3453210	3083870	2747060	2593690
O43813	O43813;H7C2E3	LANC1_HUMAN	LANCL1	Glutathione S-transferase LANCL1	2470760	2949440	3002690	3192270	2943260	3008370
Q9Y285	Q9Y285;K7ER00;Q9Y285-2	SYFA_HUMAN	FARSA	Phenylalanine--tRNA ligase alpha subunit	2453520	3072330	2848550	3157770	3717140	3165630
P63000;P63000-2	P63000;P63000-2	RAC1-2_HUMAN;RAC1_HUMAN	RAC1	Ras-related C3 botulinum toxin substrate 1	2645590	2502820	3464030	3115190	2707030	3093010
P60981;P60981-2	P60981;F6RFD5;P60981-2	DEST-2_HUMAN;DEST_HUMAN	DSTN	Destrin	3236770	3024880	3170890	2795720	2939240	2917260
Q8IWX8	Q8IWX8;J3QK89	CHERP_HUMAN	CHERP	Calcium homeostasis endoplasmic reticulum protein	3139000	3310250	2863180	3228480	3299540	3401610
Q2TAA2	Q2TAA2;H7C5G1;Q2TAA2-2	IAH1_HUMAN	IAH1	Isoamyl acetate-hydrolyzing esterase 1 homolog	1874470	3057080	3086270	2925850	3061590	3434120
P32456	P32456	GBP2_HUMAN	GBP2	Guanylate-binding protein 2	3077240	2927880	2921270	3092290	2896420	3018670
Q96BW5;Q96BW5-2	Q96BW5;Q96BW5-2	PTER-2_HUMAN;PTER_HUMAN	PTER	Phosphotriesterase-related protein	2992780	2672120	2820680	3134870	3278120	3418330
Q9H3M7	Q9H3M7;Q9H3M7-2	TXNIP_HUMAN	TXNIP	Thioredoxin-interacting protein	2055530	2811620	3486000	3326420	2725240	3414430
Q15020	Q15020;F8VV04;Q15020-4	SART3_HUMAN	SART3	Squamous cell carcinoma antigen recognized by T-cells 3	2693850	3146550	3302850	3073780	3153140	3298820
Q15436	Q15436;F5H365;Q15436-2	SC23A_HUMAN	SEC23A	Protein transport protein Sec23A	2795360	3076250	3210110	2843540	3040540	2936500
P51124	P51124;U3KQV5	GRAM_HUMAN	GZMM	Granzyme M	3052180	3138790	3474060	2839800	3079340	2624080
P51148;P51148-2	P20339;P51148;P61020;F8VUA5;F8VVK3;F8VVZ0;K7ENY4;K7ERQ8;P20339-2;P51148-2;P61020-2;K7ERI8	RAB5C-2_HUMAN;RAB5C_HUMAN	RAB5C	Ras-related protein Rab-5C	3052030	2926890	3160120	3299840	3104860	2923040
O75436	O75436	VP26A_HUMAN	VPS26A	Vacuolar protein sorting-associated protein 26A	2890160	3093770	2972950	2757530	2865860	2899750
O15355	O15355	PPM1G_HUMAN	PPM1G	Protein phosphatase 1G	3518370	3460860	2926300	3512410	3091150	3185260
P12236	P12235;P12236;V9GYG0	ADT3_HUMAN	SLC25A6	ADP/ATP translocase 3	2183500	3156580	4066500	3141250	2925210	1873720
Q9NVZ3	Q9NVZ3;D6RB24;Q9NVZ3-2;Q9NVZ3-4	NECP2_HUMAN	NECAP2	Adaptin ear-binding coat-associated protein 2	3067210	2989880	2936080	2731830	2568030	2725200
Q6P2Q9	Q6P2Q9;I3L0J9	PRP8_HUMAN	PRPF8	Pre-mRNA-processing-splicing factor 8	3020370	3298070	3277490	3250200	3002330	2839370
Q13951	Q13951;J3KS23	PEBB_HUMAN	CBFB	Core-binding factor subunit beta	4059950	3222720	2737500	3394200	2987590	3941320
Q13126	Q13126;B4DUC8;J3QSB7;Q13126-2;Q13126-3;Q13126-4;Q13126-5;Q13126-6;Q13126-7;F2Z2F3	MTAP_HUMAN	MTAP	S-methyl-5'-thioadenosine phosphorylase	3394240	3167050	2686110	2745780	3285310	3150330
Q8NC51;Q8NC51-3	Q8NC51;Q8NC51-2;Q8NC51-3;Q8NC51-4	PAIRB-3_HUMAN;PAIRB_HUMAN	SERBP1	Plasminogen activator inhibitor 1 RNA-binding protein	2217440	2421650	3111150	2854820	4352850	2513020
Q9UHL4	Q9UHL4;R4GMR2	DPP2_HUMAN	DPP7	Dipeptidyl peptidase 2	4347560	906143	3199280	1722620	1181230	5499810
P09497-2	P09497;P09497-2	CLCB-2_HUMAN	CLTB	Isoform of P09497, Isoform Non-brain of Clathrin light chain B	3501260	3051280	3186890	3297330	3316620	3475810
Q9NR28;Q9NR28-2	Q9NR28;A0A2U3TZH2;H7BZK7;Q9NR28-2	DBLOH-2_HUMAN;DBLOH_HUMAN	DIABLO	Diablo homolog, mitochondrial	2610820	2908790	3040120	2947100	3208640	3414030
Q15008	Q15008;Q15008-2;Q15008-3;Q15008-4	PSMD6_HUMAN	PSMD6	26S proteasome non-ATPase regulatory subunit 6	2919180	3086580	3057240	3093880	3007030	2880840
Q9UK76;Q9UK76-2	Q9UK76;J3KT51;Q9UK76-2	JUPI1-2_HUMAN;JUPI1_HUMAN	JPT1	Jupiter microtubule associated homolog 1	3037320	3307720	3501570	3766150	3120610	2984770
O75828	O75828	CBR3_HUMAN	CBR3	Carbonyl reductase [NADPH] 3	3339590	3143520	2863370	2856890	2991070	3031220
Q9UNN5	Q9UNN5;B1ANM7;B3KT28;Q9UNN5-2	FAF1_HUMAN	FAF1	FAS-associated factor 1	3205100	3215650	3042230	2949640	3442640	3097390
Q9NUJ1	Q9NUJ1;Q9NUJ1-2	ABHDA_HUMAN	ABHD10	Mycophenolic acid acyl-glucuronide esterase, mitochondrial	2775710	2481190	2593800	2795940	2892770	3349700
Q8IY67-2	Q8IY67;A0A087WZ13;E9PAU2;K7EKR9;Q8IY67-2	RAVR1-2_HUMAN	RAVER1	Isoform of Q8IY67, Isoform 2 of Ribonucleoprotein PTB-binding 1	3227620	2973480	2862770	3345170	3621920	3693520
Q8N1K5;Q8N1K5-2;Q8N1K5-4	Q8N1K5;A0A0D9SFD2;Q8N1K5-2;Q8N1K5-3;Q8N1K5-4	THMS1-2_HUMAN;THMS1-4_HUMAN;THMS1_HUMAN	THEMIS	Protein THEMIS	3084910	2731580	3108240	2996040	4019920	3057810
Q01826;Q01826-2	Q01826;Q01826-2	SATB1-2_HUMAN;SATB1_HUMAN	SATB1	DNA-binding protein SATB1	3359600	3073600	2643900	2908340	2713560	2703980
Q8IZH2;Q8IZH2-2	Q8IZH2;H7C5E4;Q8IZH2-2	XRN1-2_HUMAN;XRN1_HUMAN	XRN1	5'-3' exoribonuclease 1	2429720	3042620	3052310	3126680	3424730	2610640
Q9GZP4	Q9GZP4;Q9GZP4-2;X6R8S9	PITH1_HUMAN	PITHD1	PITH domain-containing protein 1	2720090	2987610	2938460	2996600	2984070	3299190
P62847;P62847-2;P62847-3;P62847-4	P62847;A0A087WUS0;A0A2R8Y849;A0A2R8Y8A0;A0A2R8YD14;E7ETK0;P62847-2;P62847-3;P62847-4	RS24-2_HUMAN;RS24-3_HUMAN;RS24-4_HUMAN;RS24_HUMAN	RPS24	40S ribosomal protein S24	3356370	2976600	2529170	3217910	3256090	2975590
Q14978-3	Q14978;A0A0A0MRM9;Q14978-2;Q14978-3;S4R341;S4R349;S4R402	NOLC1-3_HUMAN	NOLC1	Isoform of Q14978, Isoform 3 of Nucleolar and coiled-body phosphoprotein 1	3429990	3320270	2760810	3224460	2758410	3418990
P11908;P11908-2	P11908;P11908-2	PRPS2-2_HUMAN;PRPS2_HUMAN	PRPS2	Ribose-phosphate pyrophosphokinase 2	2984110	3471610	2503320	3101440	3549070	3186600
Q9BVG4	Q9BVG4;A6NDF3	PBDC1_HUMAN	PBDC1	Protein PBDC1	2923880	2906740	3026480	3260850	3288780	3292790
Q92947	Q92947;K7EKT3;Q92947-2	GCDH_HUMAN	GCDH	Glutaryl-CoA dehydrogenase, mitochondrial	3573530	3136280	2849230	2836410	2815470	2982830
Q9NSE4	Q9NSE4	SYIM_HUMAN	IARS2	Isoleucine--tRNA ligase, mitochondrial	2460690	2878050	3329350	2832890	2945370	2804730
P53618	P53618	COPB_HUMAN	COPB1	Coatomer subunit beta	2893360	3242530	3154430	3139690	2664310	2749980
Q86TX2	Q86TX2;G3V4F2	ACOT1_HUMAN	ACOT1	Acyl-coenzyme A thioesterase 1	3106710	3156570	3304910	2943960	1676380	3134630
O95834-2;O95834-3	O95834;O95834-2;O95834-3	EMAL2-2_HUMAN;EMAL2-3_HUMAN	EML2	Isoform of O95834, Isoform 2 of Echinoderm microtubule-associated protein-like 2	2760630	2805490	2910550	2939290	3159420	2799690
Q9P0J0;Q9P0J0-2	Q9P0J0;Q9P0J0-2	NDUAD-2_HUMAN;NDUAD_HUMAN	NDUFA13	NADH dehydrogenase [ubiquinone] 1 alpha subcomplex subunit 13	2739520	2982030	2968100	2690280	2942220	2703280
P36954	P36954;K7EKS1	RPB9_HUMAN	POLR2I	DNA-directed RNA polymerase II subunit RPB9	2931250	3019310	2750680	3900000	3122580	3546350
P62495;P62495-2	P62495;B7Z7P8;P62495-2	ERF1-2_HUMAN;ERF1_HUMAN	ETF1	Eukaryotic peptide chain release factor subunit 1	2619800	3071490	3561520	3339350	3392270	2800780
Q15125	Q15125	EBP_HUMAN	EBP	3-beta-hydroxysteroid-Delta(8),Delta(7)-isomerase	3089780	2188620	2528610	2618700	4190990	2677170
P49756	P49756;H0YE46;P49756-2;P49756-3	RBM25_HUMAN	RBM25	RNA-binding protein 25	2776490	3076070	2942530	2932460	2966810	2994830
Q8WZA0;Q8WZA0-2	Q8WZA0;Q8WZA0-2	LZIC-2_HUMAN;LZIC_HUMAN	LZIC	Protein LZIC	2948330	2922120	3138300	2981190	3198100	3292400
P18031	P18031	PTN1_HUMAN	PTPN1	Tyrosine-protein phosphatase non-receptor type 1	2679230	3236240	2792000	3486200	3046570	2763850
P45973	P45973	CBX5_HUMAN	CBX5	Chromobox protein homolog 5	3148790	3629400	2643030	3255800	3340330	2951130
P13987;P13987-2	P13987;A0A2U3TZL5;H0YET2;P13987-2;E9PNW4	CD59-2_HUMAN;CD59_HUMAN	CD59	CD59 glycoprotein	3388600	2661420	3778430	3281620	1985770	2468480
Q92556	Q92556;Q92556-2;Q92556-3	ELMO1_HUMAN	ELMO1	Engulfment and cell motility protein 1	3042410	2842750	3315570	2735990	2803780	2638360
Q8NBS9	Q8NBS9;Q8NBS9-2	TXND5_HUMAN	TXNDC5	Thioredoxin domain-containing protein 5	3329900	2762830	2671320	3506930	3557010	2983990
O14618	O14618;E9PP76;J3KNF4	CCS_HUMAN	CCS	Copper chaperone for superoxide dismutase	2828040	2949890	2859950	3101290	3372280	3018890
Q6NVY1	Q6NVY1;B9A058;F8W8A6;H7C1A5;Q6NVY1-2	HIBCH_HUMAN	HIBCH	3-hydroxyisobutyryl-CoA hydrolase, mitochondrial	1873500	3082000	3009350	2897210	2966110	3300690
P83916	P83916;B5MD17;J3KS05	CBX1_HUMAN	CBX1	Chromobox protein homolog 1	2851890	2997870	2909600	3087640	3431680	3513150
Q9C0J8	Q9C0J8;C9J8B4;Q9C0J8-2;Q9C0J8-3	WDR33_HUMAN	WDR33	pre-mRNA 3' end processing protein WDR33	2407030	2549300	3231160	3020550	3194570	3099630
Q9P289	Q9P289;B4E0Y9;Q8NBY1;Q9P289-3	STK26_HUMAN	STK26	Serine/threonine-protein kinase 26	3021040	3194340	2980540	2799680	3292410	3251180
Q9Y296	Q9Y296;E9PN70;G3V1A0;G5EA23;J3KP27	TPPC4_HUMAN	TRAPPC4	Trafficking protein particle complex subunit 4	3107770	2918880	2761750	2995970	2636970	3284370
O14920	O14920;O14920-2;O14920-4	IKKB_HUMAN	IKBKB	Inhibitor of nuclear factor kappa-B kinase subunit beta	2514340	3201850	3174560	3370160	2696580	2836300
Q16666;Q16666-2;Q16666-3	Q16666;H3BM18;Q16666-2;Q16666-3;X6RHM1	IF16-2_HUMAN;IF16-3_HUMAN;IF16_HUMAN	IFI16	Gamma-interferon-inducible protein 16	1807830	2079770	2656510	3680940	4116590	3064510
Q92820	Q92820	GGH_HUMAN	GGH	Gamma-glutamyl hydrolase	3028510	2575050	2870100	2708260	3124210	2935220
P25774	P25774;P25774-2;U3KQE7	CATS_HUMAN	CTSS	Cathepsin S	2779680	3151610	3241120	2965790	1726850	2323750
Q8WYA6;Q8WYA6-4	Q8WYA6;A0A087WUB9;Q8WYA6-2;Q8WYA6-3;Q8WYA6-4	CTBL1-4_HUMAN;CTBL1_HUMAN	CTNNBL1	Beta-catenin-like protein 1	2882200	3268700	3075530	3162470	2718810	3262080
Q13451	Q13451	FKBP5_HUMAN	FKBP5	Peptidyl-prolyl cis-trans isomerase FKBP5	2977960	3770990	2920530	2592800	2788410	2598460
Q9NTK5	Q9NTK5;J3KQ32;Q9NTK5-2	OLA1_HUMAN	OLA1	Obg-like ATPase 1	2550120	2473950	2666320	2804550	3235320	2829140
Q9BYZ2	Q9BYZ2	LDH6B_HUMAN	LDHAL6B	L-lactate dehydrogenase A-like 6B	1899750	1827320	2227850	2594620	3998490	3135330
O00165;O00165-2;O00165-5	O00165;E9PIQ7;O00165-2;O00165-3;O00165-5	HAX1-2_HUMAN;HAX1-5_HUMAN;HAX1_HUMAN	HAX1	HCLS1-associated protein X-1	2859310	3194750	2947930	2995280	3244270	2877170
Q7L5N1	Q7L5N1;E7EM64	CSN6_HUMAN	COPS6	COP9 signalosome complex subunit 6	3079070	2986290	2692250	3033480	2891590	3074730
Q9BWU0	Q9BWU0;A0A087X0M4	NADAP_HUMAN	SLC4A1AP	Kanadaptin	2878850	2903050	3043760	3434080	2498260	3057060
Q5Y7A7	P01912;Q5Y7A7	2B1D_HUMAN	HLA-DRB1	Isoform of P01911, HLA class II histocompatibility antigen, DRB1-13 beta chain	1875640	2201590	2570690	5006220	1347350	2068910
Q9UBQ7	Q9UBQ7;U3KQ56	GRHPR_HUMAN	GRHPR	Glyoxylate reductase/hydroxypyruvate reductase	3246630	2439530	2588110	2319350	2679800	3504640
O00483	O00483	NDUA4_HUMAN	NDUFA4	Cytochrome c oxidase subunit NDUFA4	2418560	2288360	2836870	3121990	2477280	3384800
Q53GS7	Q53GS7	GLE1_HUMAN	GLE1	Nucleoporin GLE1	3139940	2702910	2805280	3030580	3220400	3133940
P20591	P20591;F8W8T1;P20591-2	MX1_HUMAN	MX1	Interferon-induced GTP-binding protein Mx1	1848920	2719900	2865860	2934390	770256	2292430
P36776;P36776-2	P36776;K7EJE8;K7EKE6;K7ER27;P36776-2;P36776-3	LONM-2_HUMAN;LONM_HUMAN	LONP1	Lon protease homolog, mitochondrial	2029290	2142800	3000630	2871040	2853950	2598660
P12270	P12270;P12270-2	TPR_HUMAN	TPR	Nucleoprotein TPR	3020130	3082090	2810290	2928350	3383060	3072350
P54709	P54709	AT1B3_HUMAN	ATP1B3	Sodium/potassium-transporting ATPase subunit beta-3	2528100	2356030	2897340	3035860	3049480	2444240
Q99471	Q99471;H3BMQ1;H3BPF6;Q99471-3	PFD5_HUMAN	PFDN5	Prefoldin subunit 5	3099600	3096420	2760680	3220030	3291890	2960500
P14618-2	H3BR70;H3BTN5;P14618-2	KPYM-2_HUMAN	PKM	Isoform of P14618, Isoform M1 of Pyruvate kinase PKM	2070580	2153260	2698870	2744320	3094810	3133620
O75380	O75380	NDUS6_HUMAN	NDUFS6	NADH dehydrogenase [ubiquinone] iron-sulfur protein 6, mitochondrial	2579370	3211930	2830450	3064680	3284200	3384930
Q96LI5	Q96LI5;Q9ULM6;D6RGK9;H0Y9C1;H0Y9Z5;Q96LI5-2	CNO6L_HUMAN	CNOT6L	CCR4-NOT transcription complex subunit 6-like	3380550	3232450	2522570	2817760	2985440	3636750
Q9UNZ2	Q9UNZ2;F2Z2K0;Q9UNZ2-4;Q9UNZ2-5;Q9UNZ2-6	NSF1C_HUMAN	NSFL1C	NSFL1 cofactor p47	2711960	3108430	3019210	2913810	3032130	3434740
P23258	P23258	TBG1_HUMAN	TUBG1	Tubulin gamma-1 chain	2762530	2899840	2884660	3108370	3198600	2558980
O15116	O15116;E5RH18;E5RJ47	LSM1_HUMAN	LSM1	U6 snRNA-associated Sm-like protein LSm1	3023990	2584440	2966100	3102200	3129040	3006950
Q12907	Q12907;D6RBV2;D6RDX1;D6RIU4	LMAN2_HUMAN	LMAN2	Vesicular integral-membrane protein VIP36	2282090	2527390	2646470	3054600	3042900	2278320
Q9UBV8	Q9UBV8	PEF1_HUMAN	PEF1	Peflin	2734960	2995050	3005130	2835760	2881130	2905250
Q6PL18	Q6PL18	ATAD2_HUMAN	ATAD2	ATPase family AAA domain-containing protein 2	2905870	3428110	2687020	3063440	2839640	3408250
Q7Z5R6	Q7Z5R6	AB1IP_HUMAN	APBB1IP	Amyloid beta A4 precursor protein-binding family B member 1-interacting protein	2840960	2912250	3270620	2778820	2417190	2964960
Q9BV20	Q9BV20;Q9BV20-2	MTNA_HUMAN	MRI1	Methylthioribose-1-phosphate isomerase	3232380	3223210	3124780	2839840	3150110	2987520
P36507	A0A1B0GUL7;P36507;G5E9C7	MP2K2_HUMAN	MAP2K2	Dual specificity mitogen-activated protein kinase kinase 2	2886280	2958990	2750700	2957250	3438200	3114160
Q9Y3P8	Q9Y3P8;A0A087WXW3	SIT1_HUMAN	SIT1	Signaling threshold-regulating transmembrane adapter 1	2740530	2465450	3014720	3563400	3393840	2364470
Q8IYB3;Q8IYB3-2	Q8IYB3;A9Z1X7;E9PCT1;M0R088;Q8IYB3-2	SRRM1-2_HUMAN;SRRM1_HUMAN	SRRM1	Serine/arginine repetitive matrix protein 1	3134290	2984790	2743910	2949040	3526090	3014340
O00584	O00584;A0A087WZM2;D6REQ6;D6RHI9	RNT2_HUMAN	RNASET2	Ribonuclease T2	3307580	2571560	3415810	2989270	2487570	2319340
P30419	O60551;P30419;P30419-2;Q5VUC6	NMT1_HUMAN	NMT1	Glycylpeptide N-tetradecanoyltransferase 1	2731820	2941030	3111280	2730070	3216400	2903180
Q9UMR2	Q9NUU7;Q9UMR2;F6QDS0;H3BQK0;I3L0H8;I3L352;Q9NUU7-2;Q9UMR2-2;Q9UMR2-3;Q9UMR2-4	DD19B_HUMAN	DDX19B	ATP-dependent RNA helicase DDX19B	3011950	2973780	2930350	2791070	2884580	2753840
Q96EY5;Q96EY5-3	Q96EY5;E9PLL0;E9PQA6;Q96EY5-2;Q96EY5-3	MB12A-3_HUMAN;MB12A_HUMAN	MVB12A	Multivesicular body subunit 12A	3069580	2508790	2049980	2618840	2796840	2535820
P13807-2	P13807;P13807-2	GYS1-2_HUMAN	GYS1	Isoform of P13807, Isoform 2 of Glycogen [starch] synthase, muscle	2335060	3149400	2674520	2775950	3102990	2782260
A0A0B4J2D5;P0DPI2	A0A096LPI6;A0A0B4J2D5;P0DPI2;A0A096LNH5;A0A0B4J2D5-2;A0A0B4J2H4;H7C1F6;H7C2G3;P0DPI2-2	GAL3A_HUMAN;GAL3B_HUMAN	GATD3A;GATD3B	Glutamine amidotransferase-like class 1 domain-containing protein 3B, mitochondrial	2650960	2712910	2389840	3010430	3177540	3247510
P61513	A6NKH3;P61513;C9J4Z3;E9PEL3;G5E9R3;M0R0A1;M0R2L6;Q6P4E4	RL37A_HUMAN	RPL37A	60S ribosomal protein L37a	2603340	2704930	2237320	3533560	3620080	2703930
Q96P70	Q96P70	IPO9_HUMAN	IPO9	Importin-9	2976590	3100530	2831090	2800920	2654350	2571270
P35611;P35611-3	P35611;E7ENY0;E7EV99;H0Y9H2;P35611-2;P35611-3;P35611-4;P35611-5;P35611-6	ADDA-3_HUMAN;ADDA_HUMAN	ADD1	Alpha-adducin	2900590	3307850	2645580	2600420	2645640	2754070
Q16831	Q16831	UPP1_HUMAN	UPP1	Uridine phosphorylase 1	2648590	2393940	2895600	2828270	2293500	3136650
O43665;O43665-1;O43665-2	O43665;O43665-1;O43665-2	RGS10-1_HUMAN;RGS10-2_HUMAN;RGS10_HUMAN	RGS10	Regulator of G-protein signaling 10	2826360	3243050	2693940	2200550	2561410	3241570
Q96CN7	Q96CN7;D6RGE2	ISOC1_HUMAN	ISOC1	Isochorismatase domain-containing protein 1	2714050	2810200	2901750	2700610	2493680	3053800
Q9HCC0	Q9HCC0;Q9HCC0-2	MCCB_HUMAN	MCCC2	Methylcrotonoyl-CoA carboxylase beta chain, mitochondrial	2541200	2800540	2878430	2875420	2712840	2920530
Q9UNM6	Q9UNM6;A0A087WUL9;E9PL38;H0YD73;J3KNQ3;Q9UNM6-2	PSD13_HUMAN	PSMD13	26S proteasome non-ATPase regulatory subunit 13	2913500	2895040	2961600	2994270	2702600	2940410
O60880	O60880;O60880-4	SH21A_HUMAN	SH2D1A	SH2 domain-containing protein 1A	2435300	2475370	3579080	2945990	3517760	2449360
Q8N684;Q8N684-2;Q8N684-3	Q8N684;F5H669;Q8N684-2;Q8N684-3	CPSF7-2_HUMAN;CPSF7-3_HUMAN;CPSF7_HUMAN	CPSF7	Cleavage and polyadenylation specificity factor subunit 7	2789980	2828250	2679180	2689010	2404700	2785570
Q08379	Q08379;A0A2Q2TH77;B7ZC06;Q08379-2	GOGA2_HUMAN	GOLGA2	Golgin subfamily A member 2	2552350	3028680	3131760	3229680	3094600	2934110
Q9BRJ2	Q9BRJ2;A0A087X2D5	RM45_HUMAN	MRPL45	39S ribosomal protein L45, mitochondrial	2497170	2466410	2766270	2744070	2998170	2602110
Q2M2I8;Q2M2I8-2	Q2M2I8;Q9NSY1;E9PG46;K4DI97;Q2M2I8-2;Q9NSY1-2;Q9NSY1-3	AAK1-2_HUMAN;AAK1_HUMAN	AAK1	AP2-associated protein kinase 1	2456760	2717030	3034590	2731850	2863050	2545350
P52815	P52815;B4DLN1	RM12_HUMAN	MRPL12	39S ribosomal protein L12, mitochondrial	2875500	2957050	2814480	3370910	2994190	3177300
Q02252;Q02252-2	Q02252;G3V4Z4;Q02252-2	MMSA-2_HUMAN;MMSA_HUMAN	ALDH6A1	Methylmalonate-semialdehyde dehydrogenase [acylating], mitochondrial	2448600	2827060	2265350	2474740	2904740	3065360
Q9UN37	I3L4J1;Q9UN37	VPS4A_HUMAN	VPS4A	Vacuolar protein sorting-associated protein 4A	2928630	2759800	2888420	2823650	2557110	2938270
P07311	P07311;G3V2U7;G3V3F8;G3V597;P07311-2	ACYP1_HUMAN	ACYP1	Acylphosphatase-1	2753440	3146650	2056810	2650930	3261280	2589120
Q9UMY4;Q9UMY4-2	Q9UMY4;A0A087X0R6;Q9UMY4-2;Q9UMY4-3	SNX12-2_HUMAN;SNX12_HUMAN	SNX12	Sorting nexin-12	2961560	2733470	2826730	2339250	2414120	2877370
Q15366-4;Q15366-7	P57721;E9PFP8;F8VRH0;P57721-4;P57721-5;Q15366-3;Q15366-4;Q15366-6;Q15366-7	PCBP2-4_HUMAN;PCBP2-7_HUMAN	PCBP2	Isoform of Q15366, Isoform 4 of Poly(rC)-binding protein 2	2912000	3100140	2864950	2945140	2662720	2742640
O43765	O43765;K7EMD6	SGTA_HUMAN	SGTA	Small glutamine-rich tetratricopeptide repeat-containing protein alpha	2606850	2731310	2689400	3061980	3102900	2977940
Q8IZP0;Q8IZP0-10;Q8IZP0-2;Q8IZP0-3;Q8IZP0-4;Q8IZP0-5;Q8IZP0-6;Q8IZP0-7;Q8IZP0-8;Q8IZP0-9	Q8IZP0;Q9NYB9;A0A0A0MRT6;A0A0C4DG21;B6VEX4;B7Z836;E7EP65;E7EW77;E9PEZ7;F8WAL6;H0Y6B5;Q8IZP0-10;Q8IZP0-11;Q8IZP0-12;Q8IZP0-2;Q8IZP0-3;Q8IZP0-4;Q8IZP0-5;Q8IZP0-6;Q8IZP0-7;Q8IZP0-8;Q8IZP0-9;Q9NYB9-2;Q9NYB9-3;Q9NYB9-4	ABI1-10_HUMAN;ABI1-2_HUMAN;ABI1-3_HUMAN;ABI1-4_HUMAN;ABI1-5_HUMAN;ABI1-6_HUMAN;ABI1-7_HUMAN;ABI1-8_HUMAN;ABI1-9_HUMAN;ABI1_HUMAN	ABI1	Abl interactor 1	2644720	2872740	2761000	2594440	2910050	2728620
O00233	O00233;F5GX23;F5H169;F5H5V4;F5H7X1;J3KN29;O00233-2	PSMD9_HUMAN	PSMD9	26S proteasome non-ATPase regulatory subunit 9	2566850	2643520	3456570	2904880	2619430	2513570
P41229;P41229-2;P41229-5	P41229;Q9BY66;E9PFH2;P41229-2;P41229-3;P41229-5;Q9BY66-2;Q9BY66-3	KDM5C-2_HUMAN;KDM5C-5_HUMAN;KDM5C_HUMAN	KDM5C	Lysine-specific demethylase 5C	2851010	2587650	2527230	2545200	2646510	3056240
O43242	O43242;O43242-2	PSMD3_HUMAN	PSMD3	26S proteasome non-ATPase regulatory subunit 3	2436340	2651130	2923530	2732730	2844390	2406480
Q96A65	Q96A65	EXOC4_HUMAN	EXOC4	Exocyst complex component 4	2385760	2951840	2980230	2750540	2839750	2378340
Q9BVK6	Q9BVK6	TMED9_HUMAN	TMED9	Transmembrane emp24 domain-containing protein 9	2594120	2744530	2797480	2833310	2717680	2463650
Q92835;Q92835-2	Q92835;H0Y5Q9;Q92835-2;Q92835-3	SHIP1-2_HUMAN;SHIP1_HUMAN	INPP5D	Phosphatidylinositol 3,4,5-trisphosphate 5-phosphatase 1	2679170	2380330	3022680	2636000	2714180	2591640
P14927	P14927	QCR7_HUMAN	UQCRB	Cytochrome b-c1 complex subunit 7	2577100	2530550	2555020	3011370	2647160	3190290
P15954	P15954;D6R9Z7	COX7C_HUMAN	COX7C	Cytochrome c oxidase subunit 7C, mitochondrial	1768180	1498650	2920000	3979920	4469750	5029060
Q14240;Q14240-2	Q14240;E7EQG2;Q14240-2	IF4A2-2_HUMAN;IF4A2_HUMAN	EIF4A2	Eukaryotic initiation factor 4A-II	2575420	3069380	2684730	2828760	2514600	3078980
O14579	O14579;M0QXB4;O14579-2;O14579-3	COPE_HUMAN	COPE	Coatomer subunit epsilon	2862700	2882600	2810410	2943300	2548370	2748720
P49327	P49327;A0A0U1RQF0	FAS_HUMAN	FASN	Fatty acid synthase	3074340	2866600	2681510	2953170	3205310	2148430
O43747	O43747;O43747-2	AP1G1_HUMAN	AP1G1	AP-1 complex subunit gamma-1	2735020	2854430	3025090	2659470	2660420	2405090
P53582	P53582;H0Y955	MAP11_HUMAN	METAP1	Methionine aminopeptidase 1	2788170	2909350	2716020	2807430	2928380	2681320
Q96TA1;Q96TA1-2	Q96TA1;Q96TA1-2	NIBL1-2_HUMAN;NIBL1_HUMAN	FAM129B	Niban-like protein 1	3310550	2358600	3267270	2702760	2043150	2726970
Q86VM9	Q86VM9;E7ERS3;Q86VM9-2	ZCH18_HUMAN	ZC3H18	Zinc finger CCCH domain-containing protein 18	2451980	2928740	2601400	3266960	3197910	3013620
Q9BSY4	Q9BSY4	CHCH5_HUMAN	CHCHD5	Coiled-coil-helix-coiled-coil-helix domain-containing protein 5	2403270	2724730	3076510	3775320	3573520	2708800
P37235	P37235;E9PC71;H7BZC1	HPCL1_HUMAN	HPCAL1	Hippocalcin-like protein 1	2694010	2829550	2550260	2741500	3207470	3218280
Q13243	Q13243;B4DJK0;B4DUA4;G3V5K8;Q13243-2;Q13243-3	SRSF5_HUMAN	SRSF5	Serine/arginine-rich splicing factor 5	2783230	2974360	2764830	2953200	2485850	2814330
O00203;O00203-3	O00203;Q13367;A0A2R8Y2A8;O00203-3;Q13367-3;Q13367-4	AP3B1-3_HUMAN;AP3B1_HUMAN	AP3B1	AP-3 complex subunit beta-1	3129210	2789650	2944840	2723900	2599090	2755230
Q8WUI4;Q8WUI4-3;Q8WUI4-4;Q8WUI4-5;Q8WUI4-6;Q8WUI4-7;Q8WUI4-8	Q8WUI4;H0YI15;J3KPH8;Q8WUI4-10;Q8WUI4-3;Q8WUI4-4;Q8WUI4-5;Q8WUI4-6;Q8WUI4-7;Q8WUI4-8	HDAC7-3_HUMAN;HDAC7-4_HUMAN;HDAC7-5_HUMAN;HDAC7-6_HUMAN;HDAC7-7_HUMAN;HDAC7-8_HUMAN;HDAC7_HUMAN	HDAC7	Histone deacetylase 7	3085210	2788520	2176450	3169770	3006340	2441530
P00403	P00403	COX2_HUMAN	MT-CO2	Cytochrome c oxidase subunit 2	2553210	3158340	2266900	2173970	2945320	1719040
Q8N5F7	Q8N5F7;A0A494C050	NKAP_HUMAN	NKAP	NF-kappa-B-activating protein	2462100	2937130	2496290	2859220	2632600	2785140
O75937	O75937;S4R3J5	DNJC8_HUMAN	DNAJC8	DnaJ homolog subfamily C member 8	2256740	2441440	2629290	2627390	2987550	2434880
O75935;O75935-3	O75935;A0A0A0MRV8;O75935-2;O75935-3;X6RA56;X6RCK5;X6RLR1	DCTN3-3_HUMAN;DCTN3_HUMAN	DCTN3	Dynactin subunit 3	2764710	2543730	2592030	2535950	2468770	2745180
P84095	P84095	RHOG_HUMAN	RHOG	Rho-related GTP-binding protein RhoG	2421870	2446960	2940190	2934670	2794550	2963440
O75410;O75410-2;O75410-7	O75410;B4E3H6;E7ET87;E7EVI4;H0YAY0;H0YBT8;O75410-2;O75410-3;O75410-4;O75410-5;O75410-6;O75410-7;O75410-8	TACC1-2_HUMAN;TACC1-7_HUMAN;TACC1_HUMAN	TACC1	Transforming acidic coiled-coil-containing protein 1	2745220	2785310	2735390	3089290	2684600	2886460
Q9HC16	Q9HC16	ABC3G_HUMAN	APOBEC3G	DNA dC->dU-editing enzyme APOBEC-3G	3276760	2926350	3401080	3528460	3352930	3133990
Q16822	Q16822;A0A0A0MS74;H0YM31;H0YML5;Q16822-2;Q16822-3	PCKGM_HUMAN	PCK2	Phosphoenolpyruvate carboxykinase [GTP], mitochondrial	2968880	2593870	2688860	2444840	2627600	2423170
Q00688	Q00688	FKBP3_HUMAN	FKBP3	Peptidyl-prolyl cis-trans isomerase FKBP3	2350890	2563850	2906720	2758220	3024110	2581090
Q9NPQ8;Q9NPQ8-4	Q9NPQ8;Q9NVN3;B7WPL0;H0YE35;Q9NPQ8-2;Q9NPQ8-3;Q9NPQ8-4;Q9NVN3-1;Q9NVN3-3;Q9NVN3-4	RIC8A-4_HUMAN;RIC8A_HUMAN	RIC8A	Synembryn-A	2931020	2917660	2806850	2801890	2471780	2912580
O00764	O00764;F2Z2Y4;O00764-3	PDXK_HUMAN	PDXK	Pyridoxal kinase	2651900	2524420	2311410	2643200	2804890	3120400
Q8NAV1	Q8NAV1	PR38A_HUMAN	PRPF38A	Pre-mRNA-splicing factor 38A	2683950	2660400	2529250	2822240	2833140	3096580
Q00577	Q00577	PURA_HUMAN	PURA	Transcriptional activator protein Pur-alpha	2398020	2440050	2860860	2350670	2260870	2944640
Q9UJU6	Q9UJU6;H0Y5J4;Q9UJU6-5	DBNL_HUMAN	DBNL	Drebrin-like protein	2596850	2785400	3299310	2471810	3014260	3217310
Q9UI30	Q9UI30;F5GX77;F5GYQ2	TR112_HUMAN	TRMT112	Multifunctional methyltransferase subunit TRM112-like protein	2394200	2718450	2389150	3096160	2206860	3234700
Q04323	Q04323;A0A087WTZ5;E9PJ81;E9PRQ7;Q04323-2	UBXN1_HUMAN	UBXN1	UBX domain-containing protein 1	2709140	2832390	2494030	2917110	2388440	2495180
Q9NZT2;Q9NZT2-2	Q9NZT2;A0A0A0MRN5;Q9NZT2-2	OGFR-2_HUMAN;OGFR_HUMAN	OGFR	Opioid growth factor receptor	2760300	2853460	2710450	2747290	2733990	2756870
Q15003	Q15003;C9J470;C9JZP1;E9PHA2	CND2_HUMAN	NCAPH	Condensin complex subunit 2	3144060	2836460	2286270	3075550	2960400	2581900
Q9BX68	Q9BX68	HINT2_HUMAN	HINT2	Histidine triad nucleotide-binding protein 2, mitochondrial	2633080	2619740	2615670	2840340	2685760	2785110
Q6UXN9	Q6UXN9	WDR82_HUMAN	WDR82	WD repeat-containing protein 82	2871950	2610780	2551500	2552690	2081640	2875230
E9PMJ5	E9PMJ5	E9PMJ5_HUMAN	VAV3	Isoform of Q9UKW4, Guanine nucleotide exchange factor VAV3	2611920	2483470	2635080	2849590	2541050	2488630
Q14765	Q14765	STAT4_HUMAN	STAT4	Signal transducer and activator of transcription 4	2968840	3175480	3074830	2621300	1878250	2265180
Q5W0V3	Q5W0V3;Q5W0V3-2	F16B1_HUMAN	FAM160B1	Protein FAM160B1	2697600	2672090	2712490	2919570	2528690	2474220
Q15126	Q15126	PMVK_HUMAN	PMVK	Phosphomevalonate kinase	2457110	2621960	2658390	2898930	2270790	2500710
Q9NQW7-3	Q9NQW7;Q5T6H2;Q5T6H3;Q5T6H7;Q9NQW7-2;Q9NQW7-3;Q9NQW7-4	XPP1-3_HUMAN	XPNPEP1	Isoform of Q9NQW7, Isoform 3 of Xaa-Pro aminopeptidase 1	2590170	2544730	2284000	3062460	2694930	2633320
Q13045-2	Q13045;J3KS54;Q13045-2;Q13045-3	FLII-2_HUMAN	FLII	Isoform of Q13045, Isoform 2 of Protein flightless-1 homolog	2116650	2456580	2854650	2678160	2899420	2326020
Q96A26	Q96A26;E9PH05;F8W7Q4	F162A_HUMAN	FAM162A	Protein FAM162A	1941770	2076860	2280240	2809580	3524100	2704210
Q8NFQ8	Q8NFQ8	TOIP2_HUMAN	TOR1AIP2	Torsin-1A-interacting protein 2		3443910	3685810	3374940	3290420
P16333	P16333;C9J0K5;C9J869;C9JVV5;C9K098;H7C5C7	NCK1_HUMAN	NCK1	Cytoplasmic protein NCK1	2543640	2454510	2763070	2555260	2657090	2891080
P12694	P12694;P12694-2;F5H5P2	ODBA_HUMAN	BCKDHA	2-oxoisovalerate dehydrogenase subunit alpha, mitochondrial	2552120	2726410	2277050	2414400	2740020	3202020
Q9H8Y8;Q9H8Y8-3	Q9H8Y8;Q9H8Y8-2;Q9H8Y8-3	GORS2-3_HUMAN;GORS2_HUMAN	GORASP2	Golgi reassembly-stacking protein 2	2504980	2600940	2524850	2996670	2942500	3396740
O75995	O75995	SASH3_HUMAN	SASH3	SAM and SH3 domain-containing protein 3	2594960	2629300	2747230	2679290	2558530	2005750
Q9NYU2;Q9NYU2-2	Q9NYU2;Q9NYU2-2	UGGG1-2_HUMAN;UGGG1_HUMAN	UGGT1	UDP-glucose:glycoprotein glucosyltransferase 1	2644080	2547790	2612680	2690800	2716690	2555030
O96019	O96019;H7C5S0	ACL6A_HUMAN	ACTL6A	Actin-like protein 6A	3073370	2782450	2512690	2571420	2619680	2659920
Q9Y4E8	Q9Y4E8;Q9Y4E8-2;Q9Y4E8-3	UBP15_HUMAN	USP15	Ubiquitin carboxyl-terminal hydrolase 15	2674010	2511960	2600540	2916650	2470200	2797960
Q8TDP1	Q8TDP1;H0YCP5;H0YEF3	RNH2C_HUMAN	RNASEH2C	Ribonuclease H2 subunit C	2636380	2913180	2399660	2327720	3412850	2914990
P55957;P55957-2	P55957;P55957-2;P55957-4	BID-2_HUMAN;BID_HUMAN	BID	BH3-interacting domain death agonist	2798420	3188520	2949610	2308770	3423420	2622350
P36405	P36405	ARL3_HUMAN	ARL3	ADP-ribosylation factor-like protein 3	2535690	2142540	2267060	2746320	2862930	3042820
Q9NRX4	Q9NRX4;Q9NRX4-2	PHP14_HUMAN	PHPT1	14 kDa phosphohistidine phosphatase	2302280	2428230	3336350	3416700	2485660	2719400
Q13867	Q13867;J3KS79;K7ENH5;K7ES02	BLMH_HUMAN	BLMH	Bleomycin hydrolase	2608180	2839200	2445660	2593460	2592280	2558250
Q9H910;Q9H910-2;Q9H910-3	Q9H910;A6NGP5;H3BMT0;H3BMV3;H3BTV5;H3BU16;Q9H910-2;Q9H910-3	JUPI2-2_HUMAN;JUPI2-3_HUMAN;JUPI2_HUMAN	JPT2	Jupiter microtubule associated homolog 2	2560250	2891080	2443950	2690850	2344140	2261950
O95782;O95782-2	O95782;O95782-2	AP2A1-2_HUMAN;AP2A1_HUMAN	AP2A1	AP-2 complex subunit alpha-1	2613700	2555460	2670410	2510130	2457180	2388640
Q08722;Q08722-2;Q08722-3;Q08722-4	Q08722;A0A2R8Y484;Q08722-2;Q08722-3;Q08722-4	CD47-2_HUMAN;CD47-3_HUMAN;CD47-4_HUMAN;CD47_HUMAN	CD47	Leukocyte surface antigen CD47	2247570	2261770	2727090	2595430	2889320	2459130
Q08752	Q08752	PPID_HUMAN	PPID	Peptidyl-prolyl cis-trans isomerase D	2754120	2796770	2563590	1853990	2606650	2856910
P42126	P42126;H3BS70;Q96DC0	ECI1_HUMAN	ECI1	Enoyl-CoA delta isomerase 1, mitochondrial	2514920	2180880	2734240	2621020	2258110	2858130
Q16576	Q16576;E9PC52;Q16576-2;Q5JP01	RBBP7_HUMAN	RBBP7	Histone-binding protein RBBP7	2703560	2901770	2376950	3097050	3000420	2763910
Q14203;Q14203-3;Q14203-4;Q14203-6	Q14203;C9JJD0;C9JJN7;C9JKG6;C9JTE5;C9JZA4;E7EX90;E9PCY0;Q14203-3;Q14203-4;Q14203-6;Q6AWB1	DCTN1-3_HUMAN;DCTN1-4_HUMAN;DCTN1-6_HUMAN;DCTN1_HUMAN	DCTN1	Dynactin subunit 1	2563780	2610050	2666280	2615470	2700340	2690530
Q8TAQ2	Q8TAQ2;F8VXC8;F8VZW6;Q8TAQ2-2;Q8TAQ2-3	SMRC2_HUMAN	SMARCC2	SWI/SNF complex subunit SMARCC2	2575830	2612120	2593150	2329110	2624470	2578570
Q99567	Q99567;J3KMX1	NUP88_HUMAN	NUP88	Nuclear pore complex protein Nup88	2582040	2763040	2498620	2622110	2749140	2711720
Q14980	Q14980;A0A087WY61;H0YFY6;K4DIE0;Q14980-2;Q14980-3;Q14980-4	NUMA1_HUMAN	NUMA1	Nuclear mitotic apparatus protein 1	2381390	2750830	2735120	2832460	3137490	2550040
Q9Y6E0;Q9Y6E0-2	Q9Y6E0;B4DR80;Q5JV98;Q9Y6E0-2	STK24-2_HUMAN;STK24_HUMAN	STK24	Serine/threonine-protein kinase 24	2735290	2732410	2761140	2740690	2466420	2744420
Q562R1	Q562R1	ACTBL_HUMAN	ACTBL2	Beta-actin-like protein 2	2634800	3173730		3058290	2976130	2658740
O14530	O14530;B8ZZX4;F8WBV5;F8WCJ3;G3XAJ4;O14530-2	TXND9_HUMAN	TXNDC9	Thioredoxin domain-containing protein 9	3015910	2788650	2535280	2945650	2122010	2929310
P50579	P50579;F8VQZ7;F8VRR3;F8VSC4;F8VY03;F8VZX9;G3V1U3;P50579-2	MAP2_HUMAN	METAP2	Methionine aminopeptidase 2	2596800	2818450	2461660	2795170	2236190	3086100
Q9Y305;Q9Y305-2;Q9Y305-4	Q9Y305;C9J7L8;H7C5Q2;Q9Y305-2;Q9Y305-3;Q9Y305-4	ACOT9-2_HUMAN;ACOT9-4_HUMAN;ACOT9_HUMAN	ACOT9	Acyl-coenzyme A thioesterase 9, mitochondrial	2269530	2106370	2560930	3312440	2421410	2135450
Q16795	Q16795;F5GY40;A0A3B3ISG8	NDUA9_HUMAN	NDUFA9	NADH dehydrogenase [ubiquinone] 1 alpha subcomplex subunit 9, mitochondrial	1941360	2665620	3103010	2577570	2724090	2496580
P19474	P19474;H0YDP8;P19474-2	RO52_HUMAN	TRIM21	E3 ubiquitin-protein ligase TRIM21	2299340	2773380	2552300	2666920	2201470	2919960
Q9GZT3;Q9GZT3-2	Q9GZT3;A0A087WUN7;G3V2S9;G3V4X6;H0YJ40;H0YJI1;Q9GZT3-2	SLIRP-2_HUMAN;SLIRP_HUMAN	SLIRP	SRA stem-loop-interacting RNA-binding protein, mitochondrial	2110100	2338060	2149510	3049590	2724600	2518800
Q7Z5L9;Q7Z5L9-2	Q7Z5L9;Q7Z5L9-2	I2BP2-2_HUMAN;I2BP2_HUMAN	IRF2BP2	Interferon regulatory factor 2-binding protein 2	2713260	2745530	2344370	2510870	2493930	2582080
P61221	P61221;D6R9I9;D6RGF4;H0Y990	ABCE1_HUMAN	ABCE1	ATP-binding cassette sub-family E member 1	2218970	2273820	2481420	2637520	2791800	2488730
P55212	P55212;P55212-2	CASP6_HUMAN	CASP6	Caspase-6	3064610	2964420	1892560	2789800	2491580	2373230
Q9BY32	Q9BY32;Q9BY32-2;Q9BY32-3	ITPA_HUMAN	ITPA	Inosine triphosphate pyrophosphatase	3293990	3492490	2623360	716237	2923220	3139900
Q9Y3Y2;Q9Y3Y2-3;Q9Y3Y2-4	Q9Y3Y2;A0A087X1B7;Q9Y3Y2-3;Q9Y3Y2-4;X6R700	CHTOP-3_HUMAN;CHTOP-4_HUMAN;CHTOP_HUMAN	CHTOP	Chromatin target of PRMT1 protein	2324300	2335220	1981070	2659380	3016690	2547020
Q96G46	K7EMI3;Q96G46;K7EM42;Q96G46-3	DUS3L_HUMAN	DUS3L	tRNA-dihydrouridine(47) synthase [NAD(P)(+)]-like	2496860	2748110	2565820	2609700	2410300	2453060
Q52LJ0	Q52LJ0;Q52LJ0-1	FA98B_HUMAN	FAM98B	Protein FAM98B	2168100	2517800	2523630	2881810	2756930	2771180
O75396	O75396	SC22B_HUMAN	SEC22B	Vesicle-trafficking protein SEC22b	1855320	2134510	2014930	2449160	3154370	1939150
P07902	G3V4G9;P07902;F2Z2X9;G3V223;G3V3U5	GALT_HUMAN	GALT	Galactose-1-phosphate uridylyltransferase	2752240	2805270	2583110	2127320	2238230	2186450
P31153	P31153;P31153-2	METK2_HUMAN	MAT2A	S-adenosylmethionine synthase isoform type-2	2578840	2567900	2327770	2687180	1997660	2640940
P49585	P49585;C9J050;C9J2E1;C9JEJ2;H7BZN1;H7C1T3	PCY1A_HUMAN	PCYT1A	Choline-phosphate cytidylyltransferase A	2680140	2626590	2662650	2544240	2065580	2530180
Q9NTZ6	Q9NTZ6	RBM12_HUMAN	RBM12	RNA-binding protein 12	2673400	2517160	2351770	2482480	2377620	2729030
O00505	O00505	IMA4_HUMAN	KPNA3	Importin subunit alpha-4	2735280	2642740	2739940	2695260	2303490	2459430
Q9NP97	Q8TF09;Q9NP97;B1AKR6;H3BQI1	DLRB1_HUMAN	DYNLRB1	Dynein light chain roadblock-type 1	2630060	2388690	2613080	2534640	2637080	2610830
O60684	O60684	IMA7_HUMAN	KPNA6	Importin subunit alpha-7	2683280	2797010	2543670	3012080	2135170	2560900
O75843	O75843;H0YJ08	AP1G2_HUMAN	AP1G2	AP-1 complex subunit gamma-like 2	3048000	3040150	2880920	2321920	2056310	2252780
O75306	O75306;O75306-2	NDUS2_HUMAN	NDUFS2	NADH dehydrogenase [ubiquinone] iron-sulfur protein 2, mitochondrial	2407920	2738790	2674360	2445190	2456770	2603980
Q9Y2X7	Q9Y2X7;A0A0C4DGN6;J3QLH1;J3QRU8;Q9Y2X7-3	GIT1_HUMAN	GIT1	ARF GTPase-activating protein GIT1	3122920	2463870	2425900	2203650	2314800	2616490
Q9BPW8	Q9BPW8;C9JDV8;H7C2U6	NIPS1_HUMAN	NIPSNAP1	Protein NipSnap homolog 1	2429430	2211630	2043010	2420530	2341350	2949080
Q9H4E7	Q9H4E7	DEFI6_HUMAN	DEF6	Differentially expressed in FDCP 6 homolog	2231870	2569610	2854150	2409020	2408390	2324160
Q9NQG5	Q9NQG5;A0A087X2D2;A2A2M0	RPR1B_HUMAN	RPRD1B	Regulation of nuclear pre-mRNA domain-containing protein 1B	2359030	2414070	2494270	2239510	2568380	2665610
O75312	O75312;H7BZM7;H7C0E5	ZPR1_HUMAN	ZPR1	Zinc finger protein ZPR1	2409810	2712490	2494630	2973490	2722870	2780700
P26440	P26440;A0A0A0MT83;H0YKV0;H0YLC3;H0YN10;H7C4G6;P26440-2	IVD_HUMAN	IVD	Isovaleryl-CoA dehydrogenase, mitochondrial	2278440	2414460	2232600	2283720	3005820	2757980
O15305	O15305;H3BPH4;H3BV55;O15305-2	PMM2_HUMAN	PMM2	Phosphomannomutase 2	2738380	2251200	2430990	2329190	2356730	2929840
Q8WWM7	Q8WWM7;H3BSK9;H3BUF6;Q8WWM7-2;Q8WWM7-3;Q8WWM7-4;Q8WWM7-5;Q8WWM7-6;Q8WWM7-8;Q8WWM7-9	ATX2L_HUMAN	ATXN2L	Ataxin-2-like protein	2381140	2327480	2333650	2588110	2671810	2482480
O00429	O00429;G8JLD5;O00429-2;O00429-3;O00429-4;O00429-5;O00429-6;O00429-7;O00429-8	DNM1L_HUMAN	DNM1L	Dynamin-1-like protein	2408090	2503100	2608950	2538420	2448810	2436540
Q13469;Q13469-4	Q13469;Q13469-2;Q13469-3;Q13469-4;Q13469-5	NFAC2-4_HUMAN;NFAC2_HUMAN	NFATC2	Nuclear factor of activated T-cells, cytoplasmic 2	2702680	2615680	2599490	2463410	2026620	2794160
Q99614	Q99614	TTC1_HUMAN	TTC1	Tetratricopeptide repeat protein 1	2182200	2732660	2554030	3069520	2789840	2754920
Q96BY6	Q96BY6;A0A2R8YD85;Q96BY6-2;Q96BY6-3	DOC10_HUMAN	DOCK10	Dedicator of cytokinesis protein 10	2216820	2573280	2864580	2284280	2265610	2194250
P49257	P49257	LMAN1_HUMAN	LMAN1	Protein ERGIC-53	1596280	2009560	1959030	2847360	3256270	2115260
Q8WXF1	Q8WXF1;Q8WXF1-2;X6RDA4	PSPC1_HUMAN	PSPC1	Paraspeckle component 1	2797980	2363400	2335910	2385920	2329100	2582250
Q9UDW1	Q9UDW1;Q9UDW1-2	QCR9_HUMAN	UQCR10	Cytochrome b-c1 complex subunit 9	2252420	2388140	3043440	2805130	2580040	2393840
O76094	O76094;O76094-2;R4GNC1	SRP72_HUMAN	SRP72	Signal recognition particle subunit SRP72	2641690	2539640	2234780	2686760	2762140	2719490
Q9NPJ3;Q9NPJ3-2	Q9NPJ3;Q9NPJ3-2	ACO13-2_HUMAN;ACO13_HUMAN	ACOT13	Acyl-coenzyme A thioesterase 13	2062680	1930310	2146200	2365320	1674450	3112740
P12814;P12814-2;P12814-3	P12814;H9KV75;P12814-2;P12814-3;P12814-4	ACTN1-2_HUMAN;ACTN1-3_HUMAN;ACTN1_HUMAN	ACTN1	Alpha-actinin-1	2347080	2997040	1895960	1834430	2729150	2706400
P20290-2	P20290;D6RDG3;H0Y9Y1;P20290-2	BTF3-2_HUMAN	BTF3	Isoform of P20290, Isoform 2 of Transcription factor BTF3	2252580	2557930	2410640	2791990	2626580	2461610
Q9P2R7;Q9P2R7-2	Q9P2R7;A0A0U1RQF8;A0A0U1RQU7;A0A2R8Y5P4;A0A2R8Y5P6;A0A2R8Y6E6;A0A2R8Y6Y7;A0A2R8YDQ9;Q9P2R7-2	SUCB1-2_HUMAN;SUCB1_HUMAN	SUCLA2	Succinate--CoA ligase [ADP-forming] subunit beta, mitochondrial	2227500	2231460	2734920	2269150	2332520	2467990
Q9UGV2	Q9UGV2;F8WBF9;Q9UGV2-2;Q9UGV2-3	NDRG3_HUMAN	NDRG3	Protein NDRG3	2510210	2710220	2414780	2543950	2829600	2474080
P51692	P51692	STA5B_HUMAN	STAT5B	Signal transducer and activator of transcription 5B	2507860	3035420	2551290	2564150	2185080	2241210
Q9BQE5	Q9BQE5;B0QYK8;E9PM95;J3KQL8	APOL2_HUMAN	APOL2	Apolipoprotein L2	2309530	2937810	2455370	2326530	2283350	2321830
O00410;O00410-3	O00410;H0Y8C6;O00410-2;O00410-3	IPO5-3_HUMAN;IPO5_HUMAN	IPO5	Importin-5	2356730	2970940	2515850	2678690	2458210	2196840
Q86XP3	Q86XP3;A0A0A0MSJ0;Q86XP3-2	DDX42_HUMAN	DDX42	ATP-dependent RNA helicase DDX42	2335810	2509650	2533550	2452240	2693370	2684120
P08574	P08574	CY1_HUMAN	CYC1	Cytochrome c1, heme protein, mitochondrial	2027230	2046190	2767570	2723110	2673080	2050680
Q9H0D6	Q9H0D6;Q9H0D6-2	XRN2_HUMAN	XRN2	5'-3' exoribonuclease 2	2483850	2603150	2761130	2552240	2333510	2494700
P19784	P19784;H3BNI9	CSK22_HUMAN	CSNK2A2	Casein kinase II subunit alpha'	2374950	2445320	2610680	2394040	2356690	2162530
O00115;O00115-2	O00115;K7ENE5;O00115-2	DNS2A-2_HUMAN;DNS2A_HUMAN	DNASE2	Deoxyribonuclease-2-alpha	2912080	2298180	2827660	2335610	2373020	2703800
O00244	O00244;E5RGN3;E5RIM7	ATOX1_HUMAN	ATOX1	Copper transport protein ATOX1	2269160	2515130	2497950	3091470	2173150	2118910
O75534;O75534-4	O75534;E9PLT0;O75534-2;O75534-3;O75534-4	CSDE1-4_HUMAN;CSDE1_HUMAN	CSDE1	Cold shock domain-containing protein E1	2519540	2442970	2245730	3065160	1921630	2671030
O75400;O75400-2	O75400;A0A3F2YNY6;F5H578;O75400-2;O75400-3	PR40A-2_HUMAN;PR40A_HUMAN	PRPF40A	Pre-mRNA-processing factor 40 homolog A	2664550	2537910	2392590	2497420	2519180	2537550
O95831	O95831;O95831-3;O95831-4;O95831-6	AIFM1_HUMAN	AIFM1	Apoptosis-inducing factor 1, mitochondrial	2234270	2216950	2430850	2374350	2366400	2228920
Q9BT78	Q9BT78;D6RAX7;D6RD63;D6RFN0;Q9BT78-2	CSN4_HUMAN	COPS4	COP9 signalosome complex subunit 4	2489080	2626130	2379490	2472420	2482460	2599080
Q16774-2	Q16774;B1ANG9;B1ANH0;B1ANH2;B1ANH3;B1ANH5;B1ANH6;Q16774-2;Q16774-3	KGUA-2_HUMAN	GUK1	Isoform of Q16774, Isoform 2 of Guanylate kinase	2322580	2355180	2251480	2569580	2536910	2478160
Q9NX14;Q9NX14-2	Q9NX14;Q9NX14-2	NDUBB-2_HUMAN;NDUBB_HUMAN	NDUFB11	NADH dehydrogenase [ubiquinone] 1 beta subcomplex subunit 11, mitochondrial	2198780	2672260	2462260	2643240	2483460	2196230
P60468	P60468	SC61B_HUMAN	SEC61B	Protein transport protein Sec61 subunit beta	2059260	2231090	2433900	2444180	2591800	1955100
O15371;O15371-2;O15371-3	O15371;A0A0D9SGB5;O15371-2;O15371-3	EIF3D-2_HUMAN;EIF3D-3_HUMAN;EIF3D_HUMAN	EIF3D	Eukaryotic translation initiation factor 3 subunit D	2213020	2576590	2750010	2664540	2540080	2304250
Q96DI7	Q96DI7;Q96DI7-2;Q9NSS8	SNR40_HUMAN	SNRNP40	U5 small nuclear ribonucleoprotein 40 kDa protein	2477860	2591810	2363320	2351550	2266210	2458530
Q6P179	Q6P179;D6RGW0;Q6P179-2;Q6P179-3;Q6P179-4	ERAP2_HUMAN	ERAP2	Endoplasmic reticulum aminopeptidase 2		3210360	2924130	2892280		3795900
O75884	O75884;O75884-2	RBBP9_HUMAN	RBBP9	Putative hydrolase RBBP9	2158790	2493830	2319600	2293320	2595810	2663850
P15374	P15374;A0A087WTB8;Q5TBK7	UCHL3_HUMAN	UCHL3	Ubiquitin carboxyl-terminal hydrolase isozyme L3	2534600	2603640	2415060	2468810	2921840	2404760
Q13526	Q13526;K7EMU7	PIN1_HUMAN	PIN1	Peptidyl-prolyl cis-trans isomerase NIMA-interacting 1	2415610	2402250	2376600	2209730	2256450	1914060
Q7Z2W4	Q7Z2W4;C9J6P4;Q7Z2W4-2;Q7Z2W4-3	ZCCHV_HUMAN	ZC3HAV1	Zinc finger CCCH-type antiviral protein 1	2211130	2325940	2635020	2653670	2480710	2106310
Q04941	Q04941;Q04941-2	PLP2_HUMAN	PLP2	Proteolipid protein 2	1824650	2284130	3037490	2245080	1986020	2138480
Q92530	Q92530;Q5QPM7;Q5QPM9	PSMF1_HUMAN	PSMF1	Proteasome inhibitor PI31 subunit	2404410	2596970	2578490	2274960	2434520	2560340
P15498	P15498;A0A0A0MR07;F5H5P4;Q96D37	VAV_HUMAN	VAV1	Proto-oncogene vav	2267790	2565070	2944490	2493750	2235650	2065190
P30566	P30566;A0A096LNY4;A0A096LNY5;A0A096LP72;A0A0A6YY92;A0A1B0GTG9;A0A1B0GTJ7;A0A1B0GWF8;A0A1B0GWJ0;B4DEP1;P30566-2;A0A1W2PRX2	PUR8_HUMAN	ADSL	Adenylosuccinate lyase	2500620	2715910	2606520	2319380	2256580	2093460
Q53QV2	Q53QV2;B5MBX5;B5MCP4	LBH_HUMAN	LBH	Protein LBH	2417510	2797340	3007400	2720720	2320700	2834050
P24723	P24723;G3V4Q6;G3V4X4;P24723-2	KPCL_HUMAN	PRKCH	Protein kinase C eta type	2629960	2866170	2514490	2404440	2655460	2378660
Q9H3H3	Q9H3H3;Q9H3H3-1;Q9H3H3-3	CK068_HUMAN	C11orf68	UPF0696 protein C11orf68	2555440	2467720	2337510	1992940	2394780	2419420
O75688	O75688;P35813;B8ZZF0;C9JIR6;E9PJN3;E9PKB5;E9PL75;O75688-2;O75688-4;O75688-5;P35813-2;P35813-3;A0A3B3IS24	PPM1B_HUMAN	PPM1B	Protein phosphatase 1B	2630070	2737890	2524330	2431540	2599310	2407480
Q2TAY7	Q2TAY7	SMU1_HUMAN	SMU1	WD40 repeat-containing protein SMU1	2484840	2490520	2345360	2245580	2300660	2439980
Q9BWJ5	Q9BWJ5	SF3B5_HUMAN	SF3B5	Splicing factor 3B subunit 5	2382100	2930320	2651740	2914350	2697750	2774760
P02686;P02686-2	P02686;A8MZH3;E9PKX9;E9PLQ9;E9PLU9;E9PMR5;E9PNZ1;E9PQE7;E9PSE2;F5H7N4;F8WEU6;H0YEA2;H0YF02;H7BYR8;J3KS94;J3KT34;J3QKL5;J3QL64;J3QQK6;P02686-2;P02686-3;P02686-4;P02686-5;P02686-6	MBP-2_HUMAN;MBP_HUMAN	MBP	Myelin basic protein	2321960	3097950	2905210	2801150	1901640	3024030
P49750	P49750;F8VU51;H0YIQ2	YLPM1_HUMAN	YLPM1	YLP motif-containing protein 1	2374370	2524970	2418170	2396790	2596390	2280830
Q9NVS9	Q9NVS9;A0A286YFL3;J3QQV6;J3QQZ9;Q9NVS9-3;Q9NVS9-4	PNPO_HUMAN	PNPO	Pyridoxine-5'-phosphate oxidase	2375930	2513630	2206080	2692530	2690430	2352750
O95400	O95400	CD2B2_HUMAN	CD2BP2	CD2 antigen cytoplasmic tail-binding protein 2	2326540	2394470	2475440	2742040	2094050	2965450
Q6FI81;Q6FI81-3	Q6FI81;H3BPG7;H3BQ23;H3BT65;H3BUG4;H3BV90;Q6FI81-3	CPIN1-3_HUMAN;CPIN1_HUMAN	CIAPIN1	Anamorsin	2377550	2446620	2360790	2874060	2447430	2468820
P34949	P34949;F5GX71;H3BMZ9;H3BP57;H3BPB8;H3BPP3;H3BT48;H3BUZ9	MPI_HUMAN	MPI	Mannose-6-phosphate isomerase	2143710	2238510	1861120	2217030	3179110	2778430
Q16186	Q16186	ADRM1_HUMAN	ADRM1	Proteasomal ubiquitin receptor ADRM1	2224430	2252880	2373790	2556750	2373950	2402040
P63272	P63272;D3DTZ5;J3QSB9	SPT4H_HUMAN	SUPT4H1	Transcription elongation factor SPT4	2818090	2376750	2248170	2352820	2001070	2614580
Q8N4T8	Q8N4T8	CBR4_HUMAN	CBR4	Carbonyl reductase family member 4	1999580	2223480	2172130	2133810	2240190	2708740
P25325;P25325-2	P25325;B1AH49;P25325-2	THTM-2_HUMAN;THTM_HUMAN	MPST	3-mercaptopyruvate sulfurtransferase	2619750	2133300	1833690	2245890	3050440	2423740
O15260;O15260-2	O15260;B7Z1G8;O15260-2;Q5T8U5	SURF4-2_HUMAN;SURF4_HUMAN	SURF4	Surfeit locus protein 4	2052320	2194530	2437010	2494160	2873860	1615560
Q96PU8;Q96PU8-6;Q96PU8-8;Q96PU8-9	Q96PU8;H0YG47;H0YGD6;Q96PU8-3;Q96PU8-5;Q96PU8-6;Q96PU8-8;Q96PU8-9	QKI-6_HUMAN;QKI-8_HUMAN;QKI-9_HUMAN;QKI_HUMAN	QKI	Protein quaking	2546040	2377910	2222020	2180300	2197770	2612560
O43264	O43264;O43264-2	ZW10_HUMAN	ZW10	Centromere/kinetochore protein zw10 homolog	2411770	2449580	2638360	2561880	2563560	2037790
Q86UP2;Q86UP2-2;Q86UP2-4	Q86UP2;Q86UP2-2;Q86UP2-3;Q86UP2-4	KTN1-2_HUMAN;KTN1-4_HUMAN;KTN1_HUMAN	KTN1	Kinectin	1996170	2799820	1927580	2870110	2615210	1955750
P57740	P57740;P57740-2;P57740-3	NU107_HUMAN	NUP107	Nuclear pore complex protein Nup107	2312120	2533990	2624220	2482310	2280260	2222270
Q13642-1;Q13642-4;Q13642-5	Q13642;A0A0D9SFB0;A0A0D9SFI6;A0A0D9SFZ9;A0A494C0D6;Q13642-1;Q13642-3;Q13642-4;Q13642-5;Q5JXH7;Q5JXH8;Q5JXH9;Q5JXI2;Q5JXI3;Q5JXI8	FHL1-1_HUMAN;FHL1-4_HUMAN;FHL1-5_HUMAN	FHL1	Isoform of Q13642, Isoform 1 of Four and a half LIM domains protein 1	2976150	2265590	1807060	2353990	2548900	2945280
Q8WU79;Q8WU79-2	Q8WU79;A0A087WV97;Q8WU79-2;Q8WU79-3	SMAP2-2_HUMAN;SMAP2_HUMAN	SMAP2	Stromal membrane-associated protein 2	2475640	2404270	2244060	2283080	2408960	2325650
O75792	O75792;A0A2R8Y658	RNH2A_HUMAN	RNASEH2A	Ribonuclease H2 subunit A	2472530	2823920	2281320	2127220	3159860	2613030
Q9NRG0	Q9NRG0;E5RGS9	CHRC1_HUMAN	CHRAC1	Chromatin accessibility complex protein 1	2899940	2869920	2264280	2731420	1800420	2354840
Q9UNP9;Q9UNP9-2;Q9UNP9-3	Q9UNP9;E9PK21;Q9UNP9-2;Q9UNP9-3	PPIE-2_HUMAN;PPIE-3_HUMAN;PPIE_HUMAN	PPIE	Peptidyl-prolyl cis-trans isomerase E	2136180	2407900	2326500	2551420	2480470	2680250
Q96I15	Q96I15;A0A0A0MQU4;C9JNL5;H7C277;H7C3V9;Q96I15-2	SCLY_HUMAN	SCLY	Selenocysteine lyase	1359720	2373770	2322700	2339320	2880770	2799730
E5RK69	E5RK69	E5RK69_HUMAN	ANXA6	Isoform of P08133, Annexin	2523780	3980510	2812960	2653760	2341030	2743070
Q9BTY7	Q9BTY7	HGH1_HUMAN	HGH1	Protein HGH1 homolog	2631170	2514630	2570440	2621680	1898550	2839720
O00442	O00442;A6NIC1;O00442-2	RTCA_HUMAN	RTCA	RNA 3'-terminal phosphate cyclase	2236420	2113530	2554600	2265160	2239410	2382310
Q9HD42	Q9HD42;F8VUA2;F8VVT7	CHM1A_HUMAN	CHMP1A	Charged multivesicular body protein 1a	2273820	2034930	2677720	1891080	2456840	2295920
O00267-2	O00267;O00267-2	SPT5H-2_HUMAN	SUPT5H	Isoform of O00267, Isoform 2 of Transcription elongation factor SPT5	2565990	2660570	2514480	2568580	2182640	2588670
Q9HCN8	Q9HCN8	SDF2L_HUMAN	SDF2L1	Stromal cell-derived factor 2-like protein 1	2650000	2300500	2203180	2804940	2379110	2588580
Q9H4G4	Q9H4G4;A0A087WUM5;Q5VZR0	GAPR1_HUMAN	GLIPR2	Golgi-associated plant pathogenesis-related protein 1	2261660	2037260	2536780	1625870	1981330	1921510
Q92696	Q92696;H0YLH3	PGTA_HUMAN	RABGGTA	Geranylgeranyl transferase type-2 subunit alpha	2328740	2511400	2076140	2577790	2189860	2407710
P48059-5	F8WE10;P48059-5	LIMS1-5_HUMAN	LIMS1	Isoform of P48059, Isoform 5 of LIM and senescent cell antigen-like-containing domain protein 1	2660750	2053690	2236890	2484200	2139560	2254640
Q9NVI7-2	Q5T9A4;Q9NVI7;H0Y2W2;Q5T9A4-2;Q5T9A4-3;Q9NVI7-2;Q9NVI7-3	ATD3A-2_HUMAN	ATAD3A	Isoform of Q9NVI7, Isoform 2 of ATPase family AAA domain-containing protein 3A	2095950	2084620	2535610	2592760	2702600	2316030
Q6P2E9	Q6P2E9	EDC4_HUMAN	EDC4	Enhancer of mRNA-decapping protein 4	2466880	2466710	2472710	2669920	2238850	2277210
Q9C0B1	Q9C0B1;A0A1B0GTC3;A0A1B0GTC5;A0A1B0GTY1;A0A1B0GU26;A0A1B0GUC3;A0A1B0GV98;A0A1B0GVH5	FTO_HUMAN	FTO	Alpha-ketoglutarate-dependent dioxygenase FTO	2311130	2533930	2244530	2508470	2584710	2839710
Q9UN86;Q9UN86-2	Q9UN86;D6RAC7;D6RB17;D6RBM9;D6RBR0;D6RBW8;D6RE13;D6REX8;D6RGJ4;Q9UN86-2	G3BP2-2_HUMAN;G3BP2_HUMAN	G3BP2	Ras GTPase-activating protein-binding protein 2	2324250	2285060	2182600	2739890	2113750	2568530
P28072	P28072;A0A087X2I4;I3L3X7	PSB6_HUMAN	PSMB6	Proteasome subunit beta type-6	2254300	1806850	2858820	2357400	2577590	1860810
Q5T4S7;Q5T4S7-2;Q5T4S7-3;Q5T4S7-4	Q5T4S7;Q5T4S7-2;Q5T4S7-3;Q5T4S7-4	UBR4-2_HUMAN;UBR4-3_HUMAN;UBR4-4_HUMAN;UBR4_HUMAN	UBR4	E3 ubiquitin-protein ligase UBR4	2140290	2548550	2361300	2511940	2267400	2038020
Q7Z6I6	Q7Z6I6;A0A0A0MRJ8;A0A0A0MRJ9;Q7Z6I6-2;Q7Z6I6-3	RHG30_HUMAN	ARHGAP30	Rho GTPase-activating protein 30	2435650	2528150	2695740	2741510	2029780	2026680
Q9Y3A3;Q9Y3A3-3	Q9Y3A3;F8W8B0;F8WAQ8;Q9Y3A3-3	PHOCN-3_HUMAN;PHOCN_HUMAN	MOB4	MOB-like protein phocein	2458420	2542210	2341140	2403300	2124370	2330060
Q14166	Q14166	TTL12_HUMAN	TTLL12	Tubulin--tyrosine ligase-like protein 12	2732650	2220880	2475370	2666580	2158420	2131200
Q9Y5L4	Q9Y5L4;K7EIT2	TIM13_HUMAN	TIMM13	Mitochondrial import inner membrane translocase subunit Tim13	2448790	2648400	2153470	2407470	2134940	2424410
Q9NT62	Q9NT62;Q9NT62-2	ATG3_HUMAN	ATG3	Ubiquitin-like-conjugating enzyme ATG3	2415590	2467980	2267050	2371920	2499750	2615870
P78362;P78362-2	P78362;H7C5L6;P78362-2	SRPK2-2_HUMAN;SRPK2_HUMAN	SRPK2	SRSF protein kinase 2	2368390	2488160	2296950	2458900	2923370	2394330
Q9Y3B7	Q9Y3B7;H0YCD5;Q9Y3B7-2;Q9Y3B7-3	RM11_HUMAN	MRPL11	39S ribosomal protein L11, mitochondrial	2266390	2041230	2287600	2578860	2574350	2542120
Q9BYD3	Q9BYD3;K7EKI4;K7ELF1;K7ELQ0;K7ES61;Q9BYD3-2;X6RAY8	RM04_HUMAN	MRPL4	39S ribosomal protein L4, mitochondrial	2299450	2186740	2406400	2551580	2503160	2568510
Q13510;Q13510-2	Q13510;A0A1B0GTM3;A0A1B0GTP7;A0A1B0GTZ5;A0A1B0GUA4;A0A1B0GUE3;A0A1B0GUG1;A0A1B0GUH5;A0A1B0GUW4;A0A1B0GV06;A0A1B0GW68;E7EMM4;Q13510-2;Q13510-3	ASAH1-2_HUMAN;ASAH1_HUMAN	ASAH1	Acid ceramidase	2245570	2353500	2898020	2085390	1571690	2834830
Q96F63	Q96F63	CCD97_HUMAN	CCDC97	Coiled-coil domain-containing protein 97	2224880	2688370	2506750	3001210	2368320	2694920
Q8WXX5	Q8WXX5	DNJC9_HUMAN	DNAJC9	DnaJ homolog subfamily C member 9	2077320	2238360	2320130	2049550	2461470	2297230
P30536	P30536;B1AH87	TSPO_HUMAN	TSPO	Translocator protein	2048940	2213640	2935500	2397000	1998500	2371050
O95758;O95758-1;O95758-2;O95758-4;O95758-5;O95758-6	O95758;O95758-1;O95758-2;O95758-4;O95758-5;O95758-6;O95758-7;X6R242	PTBP3-1_HUMAN;PTBP3-2_HUMAN;PTBP3-4_HUMAN;PTBP3-5_HUMAN;PTBP3-6_HUMAN;PTBP3_HUMAN	PTBP3	Polypyrimidine tract-binding protein 3	2298800	2231550	2632570	2403420	2313690	2368020
Q13576	Q13576	IQGA2_HUMAN	IQGAP2	Ras GTPase-activating-like protein IQGAP2	1858070	1957940	2797090	2172290	2598900	2287130
Q8NFW8	Q8NFW8	NEUA_HUMAN	CMAS	N-acylneuraminate cytidylyltransferase	1952150	2139820	2664940	2415690	2313940	2732490
Q07866;Q07866-10;Q07866-2;Q07866-3;Q07866-4;Q07866-5;Q07866-6;Q07866-7;Q07866-8;Q07866-9	Q07866;F8W6L3;G3V2E7;G3V3H3;G3V5R9;G5E9S8;Q07866-10;Q07866-2;Q07866-3;Q07866-4;Q07866-5;Q07866-6;Q07866-7;Q07866-8;Q07866-9;E7EVH7	KLC1-10_HUMAN;KLC1-2_HUMAN;KLC1-3_HUMAN;KLC1-4_HUMAN;KLC1-5_HUMAN;KLC1-6_HUMAN;KLC1-7_HUMAN;KLC1-8_HUMAN;KLC1-9_HUMAN;KLC1_HUMAN	KLC1	Kinesin light chain 1	2425760	2262060	2389960	2407110	2238340	2338580
Q96AZ6	Q96AZ6;H0YMM4;H3BLY5;Q96AZ6-2	ISG20_HUMAN	ISG20	Interferon-stimulated gene 20 kDa protein	2046290	2466740	2275020	1841910	1736590	2058730
Q9Y3B8	Q9Y3B8;F5GYG5;H0YG54;H0YGR4;Q9Y3B8-2;Q9Y3B8-3	ORN_HUMAN	REXO2	Oligoribonuclease, mitochondrial	2520310	2331260	2391600	2513790	2262230	2414200
P46379;P46379-2;P46379-3	P46379;A0A024RCR6;A0A0G2JJM1;A0A0G2JK23;A0A0G2JL47;F6S6P2;P46379-2;P46379-3;P46379-4;P46379-5;X6REW1	BAG6-2_HUMAN;BAG6-3_HUMAN;BAG6_HUMAN	BAG6	Large proline-rich protein BAG6	2294880	2406240	2422490	2556030	2229350	2283310
Q8IV04	Q8IV04;E9PSB7;Q8IV04-2	TB10C_HUMAN	TBC1D10C	Carabin	2311040	2418940	3025860	2408280	2059040	1915040
Q9NWB6	Q9NWB6;Q9NWB6-2;Q9NWB6-3	ARGL1_HUMAN	ARGLU1	Arginine and glutamate-rich protein 1	1651660	2076070	1757960	2093140	1761220	2002460
Q15427	Q15427;Q5SZ64	SF3B4_HUMAN	SF3B4	Splicing factor 3B subunit 4	2209260	2461870	2302000	2450520	2466150	2223860
Q9Y512	Q9Y512	SAM50_HUMAN	SAMM50	Sorting and assembly machinery component 50 homolog	2163790	2179770	2449080	2135240	2219790	2117900
A5YKK6	A5YKK6;A5YKK6-2	CNOT1_HUMAN	CNOT1	CCR4-NOT transcription complex subunit 1	2311290	2531010	2327850	2393210	2145360	2131090
O00139-2	O00139;D6R9M0;O00139-1;O00139-2;O00139-4;O00139-5	KIF2A-2_HUMAN	KIF2A	Isoform of O00139, Isoform 2 of Kinesin-like protein KIF2A	1616250	1568190	1972730	2761280	2405180	2183580
Q8NDX1	Q8NDX1;Q8NDX1-2	PSD4_HUMAN	PSD4	PH and SEC7 domain-containing protein 4	2161180	2252410	2323830	2479470	2591630	2584840
O75663	O75663;O75663-2	TIPRL_HUMAN	TIPRL	TIP41-like protein	2161520	2481030	2422600	2231550	2497190	2364630
P52298	P52298;B3KSB0;C9JQX9;P52298-2;P52298-3	NCBP2_HUMAN	NCBP2	Nuclear cap-binding protein subunit 2	2426020	2423780	2165550	2317200	2054970	2418600
Q9UL18	Q9UL18;A0A0U1RQZ8;Q5TA58	AGO1_HUMAN	AGO1	Protein argonaute-1	2219300	2178410	2404900	2164550	2247900	2207710
P49903	P49903;P49903-2;P49903-3	SPS1_HUMAN	SEPHS1	Selenide, water dikinase 1	2481930	2385430	2157130	2213110	2255870	2442980
P28340	P28340;A0A2R8Y705;M0QZR8;M0R2B7	DPOD1_HUMAN	POLD1	DNA polymerase delta catalytic subunit	2128260	2485470	2078280	2637160	2634230	2274540
Q9GZU8	Q9GZU8;H3BMX9;H3BN22;H3BP64;H3BQQ6;H3BSF0;H3BSY6;H3BTI2;H3BTP8;H3BUL4;Q6P4H7	PIP30_HUMAN	FAM192A	PSME3-interacting protein	2155080	2382450	2361240	2646470	2028300	2369160
O95861;O95861-4	O95861;A6NF51;O95861-2;O95861-3;O95861-4	BPNT1-4_HUMAN;BPNT1_HUMAN	BPNT1	3'(2'),5'-bisphosphate nucleotidase 1	2437880	2583160	2330680	2374420	2374960	1266190
O75223	O75223;O75223-3;M0QZK8	GGCT_HUMAN	GGCT	Gamma-glutamylcyclotransferase	2392080	2217820	2156120	2151840	2881420	2335890
O60664;O60664-3;O60664-4	O60664;K7EL96;K7ER39;K7ERZ3;O60664-3;O60664-4	PLIN3-3_HUMAN;PLIN3-4_HUMAN;PLIN3_HUMAN	PLIN3	Perilipin-3	2688790	2711490	1930720	1557450	3185710	2164380
Q15042	Q15042;Q15042-3;Q15042-4	RB3GP_HUMAN	RAB3GAP1	Rab3 GTPase-activating protein catalytic subunit	2112720	2426030	2130430	2287020	2288020	2321330
Q0VD83;Q0VD83-4	Q0VD83;Q0VD83-2;Q0VD83-3;Q0VD83-4	APOBR-4_HUMAN;APOBR_HUMAN	APOBR	Apolipoprotein B receptor	1529340	2250910	2629900	2774030	2479560	2980720
Q9NX08	Q9NX08	COMD8_HUMAN	COMMD8	COMM domain-containing protein 8	2211130	2164660	2568630	2685770	2191200	2392160
Q7Z4V5	Q7Z4V5;Q9Y3E1;A0A024R216;M0R0J3;Q7Z4V5-2;Q7Z4V5-3;Q7Z4V5-4	HDGR2_HUMAN	HDGFL2	Hepatoma-derived growth factor-related protein 2	2461980	2369720	2220450	2360150	3277010	2629760
Q96IX5	Q96IX5	ATPMD_HUMAN	ATP5MD	ATP synthase membrane subunit DAPIT, mitochondrial	1900630	2103200	2447910	2048780	2170860	1536860
Q9H2H8	Q9H2H8;B8ZZ77;H7BZ14;Q9H2H8-2	PPIL3_HUMAN	PPIL3	Peptidyl-prolyl cis-trans isomerase-like 3	2002040	2380360	2305640	2286180	2608370	2557950
Q8N1G4	Q8N1G4	LRC47_HUMAN	LRRC47	Leucine-rich repeat-containing protein 47	1770770	1949680	2506940	2138340	2768170	2369800
P00387;P00387-2;P00387-3	P00387;P00387-2;P00387-3	NB5R3-2_HUMAN;NB5R3-3_HUMAN;NB5R3_HUMAN	CYB5R3	NADH-cytochrome b5 reductase 3	1960160	1975110	2661640	2237240	2659580	1953800
Q92541	Q92541	RTF1_HUMAN	RTF1	RNA polymerase-associated protein RTF1 homolog	2315220	2537290	2184900	2329850	2400570	2501130
Q8N3U4;Q8N3U4-2	Q8N3U4;Q8WVM7;Q8N3U4-2;Q8WVM7-2	STAG2-2_HUMAN;STAG2_HUMAN	STAG2	Cohesin subunit SA-2	2307880	2346510	2163000	2292320	2447270	2264280
P61106	P61106;X6RFL8	RAB14_HUMAN	RAB14	Ras-related protein Rab-14	1947930	2254840	2315300	2354380	2259930	2253030
O43865	O43865	SAHH2_HUMAN	AHCYL1	S-adenosylhomocysteine hydrolase-like protein 1	2261070	2366390	2325620	2245590	2334340	2200110
O43252	O43252	PAPS1_HUMAN	PAPSS1	Bifunctional 3'-phosphoadenosine 5'-phosphosulfate synthase 1	1594840	2142840	2244510	2542930	2138270	2093980
Q9NQP4	Q9NQP4;E9PQY2	PFD4_HUMAN	PFDN4	Prefoldin subunit 4	2113740	2292140	2214680	2476190	2708650	2254960
P24928	P24928	RPB1_HUMAN	POLR2A	DNA-directed RNA polymerase II subunit RPB1	2058260	2353040	2422990	2306060	2332100	2269200
Q9BPZ3	Q9BPZ3;D6RA77	PAIP2_HUMAN	PAIP2	Polyadenylate-binding protein-interacting protein 2	2589680	2554880	2503140	2914450	2109840	2291230
Q9UHY7	Q9UHY7;A0A0C4DGY8;D6RA00;Q9UHY7-2	ENOPH_HUMAN	ENOPH1	Enolase-phosphatase E1	2103610	2459860	2178520	2341110	2357310	2262000
Q9UHD9	Q9UHD9	UBQL2_HUMAN	UBQLN2	Ubiquilin-2	2065260	2835390	2111950	2240490	1759080	2295550
Q9ULA0	Q9ULA0;A0A024R442;E7EMB6;E7ETB3	DNPEP_HUMAN	DNPEP	Aspartyl aminopeptidase	1968980	2067630	2085330	1911590	2297300	2551460
O60934	O60934;A0A0C4DG07	NBN_HUMAN	NBN	Nibrin	1931610	2041250	1928580	2210850	2255760	2234450
Q7Z3B4;Q7Z3B4-3	Q7Z3B4;Q7Z3B4-2;Q7Z3B4-3	NUP54-3_HUMAN;NUP54_HUMAN	NUP54	Nucleoporin p54	2405640	2153180	2169660	2207570	2386060	2221250
O14672	O14672;O14672-2	ADA10_HUMAN	ADAM10	Disintegrin and metalloproteinase domain-containing protein 10	1827810	1998370	2402620	2529020	2211360	1964930
Q9Y3B4	Q9Y3B4	SF3B6_HUMAN	SF3B6	Splicing factor 3B subunit 6	2158830	2105440	2211290	2124490	2366830	2086720
Q6QNY1;Q6QNY1-2	Q6QNY1;J3QRU7;Q6QNY1-2	BL1S2-2_HUMAN;BL1S2_HUMAN	BLOC1S2	Biogenesis of lysosome-related organelles complex 1 subunit 2	1938850	2698130	2502680	2488890	1867450	2013100
O43633	O43633;M0QXX8;M0R1L7	CHM2A_HUMAN	CHMP2A	Charged multivesicular body protein 2a	2081100	2061940	2617290	2180640	2097940	1934260
P11171;P11171-2	P11171;Q9H4G0;Q9Y2J2;A0A0A0MRA8;A0A0C4DH22;A0A1B0GTF8;A0A1B0GWG0;A0A2R8Y420;A0A2R8Y570;A0A2R8Y5G2;A0A2R8Y5Z6;A0A2R8Y6D0;A0A2R8Y6G5;A0A2R8Y6T6;A0A2R8Y7N0;A0A2R8Y7Y3;A0A2R8YCW8;A0A2R8YD30;A0A2R8YFR9;A0A2U3TZH6;A0A3B3ITC5;A0A3B3ITP0;A0A3B3IU06;A0A3B3IUD6;A8K968;P11171-2;P11171-3;P11171-4;P11171-5;P11171-6;P11171-7;Q4VB86;Q4VXN0;Q4VXN1;Q9H4G0-2;Q9H4G0-3;Q9H4G0-4;Q9Y2J2-2;Q9Y2J2-3;Q9Y2J2-4	41-2_HUMAN;41_HUMAN	EPB41	Protein 4.1	2174320	2272010	2353790	2196040	2505730	2335560
Q13155	Q13155;A8MU58;Q13155-2	AIMP2_HUMAN	AIMP2	Aminoacyl tRNA synthase complex-interacting multifunctional protein 2	2106930	2338110	2161830	2085590	2268000	2059190
P04222	P01893;A0A0G2JH50;A0A0G2JIF0;A0A0G2JPT2;A0A140T912;A0A140T930;A0A140T937;A0A140T962;A0A140T9B3;A0A140T9J9;A0A140T9M0;A0A140T9U0;A0A140T9W2;A0A1W2PNZ7;A0A1W2PP77;A0A1W2PR11;A0A1W2PRX1;A0A1W2PRZ0;A0A1W2PS56;A2BF26;P04222;P30499;P30501;P30504;P30505;P30508;P30510;Q07000;Q09160;Q29865;Q29960;Q29960-2;Q29963;Q9TNN7	1C03_HUMAN	HLA-C	Isoform of Q95604, HLA class I histocompatibility antigen, Cw-3 alpha chain	1628710	2225670	2507320	2651860	1981990	1860820
P27708	P27708;F8VPD4;H7C2E4	PYR1_HUMAN	CAD	CAD protein	2011670	2325200	2179670	2300500	2353170	1965760
Q9Y5Y2	Q9Y5Y2;B7Z6P0;H3BQR2	NUBP2_HUMAN	NUBP2	Cytosolic Fe-S cluster assembly factor NUBP2	2133230	2222050	2314380	2343830	2416890	2501860
Q9P107	Q9P107;K7EJC2;Q9P107-2	GMIP_HUMAN	GMIP	GEM-interacting protein	2176420	2238460	2290510	2351300	2270390	2214580
P51114	P51114;B4DXZ6;C9JY20;C9JZE0;E7EU85;E9PFF5;P51114-2;P51114-3	FXR1_HUMAN	FXR1	Fragile X mental retardation syndrome-related protein 1	2274210	2131660	2274700	2563510	2344690	2202390
Q9Y5J7	Q9Y5J7;A0A1W2PQS5;A0A1W2PRH9;G3V2F3;G3V502	TIM9_HUMAN	TIMM9	Mitochondrial import inner membrane translocase subunit Tim9	2196490	2427720	2270300	2526220	2410050	2728170
Q9NYB0	Q9NYB0;H3BMI8	TE2IP_HUMAN	TERF2IP	Telomeric repeat-binding factor 2-interacting protein 1	2217640	2287120	2112100	2302390	2304660	2449570
Q15388	Q15388	TOM20_HUMAN	TOMM20	Mitochondrial import receptor subunit TOM20 homolog	1953510	2199400	2794640	2919430	2958980	2328940
O75582	O75582;O75676;A0A0A6YYC0;A0A3B3ISL8;E9PJN1;G3V2D1;O75582-2;O75676-2	KS6A5_HUMAN	RPS6KA5	Ribosomal protein S6 kinase alpha-5	2339830	2367640	2717840	2029750	1946220	1841260
P28161	P09488;P28161;Q03013;A0A0A0MR85;B9ZVX7;E7EWW9;E9PHN6;E9PHN7;E9PLF1;F6XZQ7;H3BQT3;P09488-2;P28161-2;Q03013-2;Q03013-3	GSTM2_HUMAN	GSTM2	Glutathione S-transferase Mu 2	1856090	2839220	2776950	1094560	1957870	3635680
Q14444;Q14444-2	Q14444;E9PLA9;G3V153;Q14444-2	CAPR1-2_HUMAN;CAPR1_HUMAN	CAPRIN1	Caprin-1	1975060	2106020	2063080	2618370	1884000	2274620
O15212	O15212	PFD6_HUMAN	PFDN6	Prefoldin subunit 6	2179390	2227310	2047720	2273560	2187510	2240350
P40616;P40616-2	P40616;B4DZG7;F8VYN9;P40616-2	ARL1-2_HUMAN;ARL1_HUMAN	ARL1	ADP-ribosylation factor-like protein 1	2065270	2297160	2025320	2651290	2362650	2344690
Q58FF6	Q58FF6	H90B4_HUMAN	HSP90AB4P	Putative heat shock protein HSP 90-beta 4	1124100	1249460	11776000	1006480	1079400	1499050
P06127	P06127	CD5_HUMAN	CD5	T-cell surface glycoprotein CD5	2189870	1802590	2015930	2046220	2210720	2077610
Q92769;Q92769-3	Q92769;Q92769-3	HDAC2-3_HUMAN;HDAC2_HUMAN	HDAC2	Histone deacetylase 2	2382590	2280330	2146000	2249660	2200510	1942370
Q92616	Q92616	GCN1_HUMAN	GCN1	eIF-2-alpha kinase activator GCN1	2024460	2161030	2297640	2439060	2094930	1837700
Q7KZ85	Q7KZ85;Q7KZ85-2	SPT6H_HUMAN	SUPT6H	Transcription elongation factor SPT6	2259170	2365280	2152000	2316260	1892220	2404810
O94768	O94768;C9JZJ1	ST17B_HUMAN	STK17B	Serine/threonine-protein kinase 17B	2033520	1992190	2266720	2499530	2081050	2334630
O75323	O75323;H7C333	NIPS2_HUMAN	NIPSNAP2	Protein NipSnap homolog 2	2127480	1989070	2185490	2104320	2096470	2285310
Q9P0J1;Q9P0J1-2	Q9P0J1;Q9P0J1-2	PDP1-2_HUMAN;PDP1_HUMAN	PDP1	[Pyruvate dehydrogenase [acetyl-transferring]]-phosphatase 1, mitochondrial	2166970	1922610	2294160	2139870	2111240	2629990
Q9BW71;Q9BW71-2	Q9BW71;Q9BW71-2	HIRP3-2_HUMAN;HIRP3_HUMAN	HIRIP3	HIRA-interacting protein 3	2485330	2300890	1812490	2236820	2301080	2640360
Q9BRT3	Q9BRT3	MIEN1_HUMAN	MIEN1	Migration and invasion enhancer 1	2143650	2552170	2597540	2588920	2341590	2279420
Q7L1Q6;Q7L1Q6-3;Q7L1Q6-4	Q7L1Q6;C9IZ80;Q7L1Q6-2;Q7L1Q6-3;Q7L1Q6-4	BZW1-3_HUMAN;BZW1-4_HUMAN;BZW1_HUMAN	BZW1	Basic leucine zipper and W2 domain-containing protein 1	2269750	2122520	2382500	2577360	2041550	2135750
O60568	O60568;H7C2S8	PLOD3_HUMAN	PLOD3	Multifunctional procollagen lysine hydroxylase and glycosyltransferase LH3	1974700	2173730	1903410	2076570	2781400	2272190
Q04206;Q04206-2	Q04206;A0A087X0W8;E9PKH5;Q04206-2;Q04206-4;Q2TAM5	TF65-2_HUMAN;TF65_HUMAN	RELA	Transcription factor p65	1928180	1948990	2210220	2110040	2082500	2237570
Q9GZZ9	Q9GZZ9;C9J5W5;C9JRV9;E7EQ61;E7EWE1;Q9GZZ9-2	UBA5_HUMAN	UBA5	Ubiquitin-like modifier-activating enzyme 5	2107470	2118220	1949170	2246020	2439550	2269280
P49589;P49589-3	P49589;B4DKY1;P49589-2;P49589-3	SYCC-3_HUMAN;SYCC_HUMAN	CARS	Cysteine--tRNA ligase, cytoplasmic	1915650	1929680	2519620	1773620	1842720	1862810
P35527	P35527	K1C9_HUMAN	KRT9	Keratin, type I cytoskeletal 9	2569270	1967980	2165240	915175	786123	3830880
Q9NR12	Q9NR12;D6RAN1;D6RF83;D6RH06;H7BYK4;Q9NR12-2;Q9NR12-3;Q9NR12-4;Q9NR12-5;Q9NR12-6	PDLI7_HUMAN	PDLIM7	PDZ and LIM domain protein 7	2437980	1863560	2026810	2082190	2185100	2326780
P13645	P13645	K1C10_HUMAN	KRT10	Keratin, type I cytoskeletal 10	1415160	1196740	1068870	746788	771752	1615870
Q9BXW7;Q9BXW7-2	Q9BXW7;Q9BXW7-2	HDHD5-2_HUMAN;HDHD5_HUMAN	HDHD5	Haloacid dehalogenase-like hydrolase domain-containing 5	2058650	2218460	1938050	2166260	2045310	2385190
Q9UHA4	Q9UHA4	LTOR3_HUMAN	LAMTOR3	Ragulator complex protein LAMTOR3	1941190	2150010	2151900	2293470	2161030	2117380
P48507	P48507	GSH0_HUMAN	GCLM	Glutamate--cysteine ligase regulatory subunit	2124730	2080700	2708360	2104830	1802210	1919640
O00754	O00754;O00754-2	MA2B1_HUMAN	MAN2B1	Lysosomal alpha-mannosidase	2371820	2189120	2495340	1870320	1543380	2192870
Q9Y295	Q9Y295	DRG1_HUMAN	DRG1	Developmentally-regulated GTP-binding protein 1	1849430	1885880	2151300	2110450	2359220	2006340
P51812	P51812;Q15349;Q15418;Q9UK32;A0A2R8Y603;B1AXG1;B4DG22;B7Z3B5;B7ZB17;E9PGT3;F2Z2J1;Q15349-2;Q15349-3;Q15418-2;Q15418-3;Q15418-4;Q5SVM6;Q9UK32-2	KS6A3_HUMAN	RPS6KA3	Ribosomal protein S6 kinase alpha-3	1869470	2006380	2075570	2129280	2594050	2109250
Q07889	Q07889;G5E9C8	SOS1_HUMAN	SOS1	Son of sevenless homolog 1	2067250	2027060	2869780	2077680	2041480	1731810
P04843	P04843;B7Z4L4	RPN1_HUMAN	RPN1	Dolichyl-diphosphooligosaccharide--protein glycosyltransferase subunit 1	1859220	1977180	1914960	2120870	2600120	1493360
Q99436	Q99436	PSB7_HUMAN	PSMB7	Proteasome subunit beta type-7	1805330	1916450	2588100	2546520	2104130	1772620
Q9BUQ8	Q9BUQ8	DDX23_HUMAN	DDX23	Probable ATP-dependent RNA helicase DDX23	1728950	1944720	2192440	2173150	2297920	2204940
Q86X76;Q86X76-2;Q86X76-4	Q86X76;Q86X76-2;Q86X76-3;Q86X76-4;Q86X76-5	NIT1-2_HUMAN;NIT1-4_HUMAN;NIT1_HUMAN	NIT1	Deaminated glutathione amidase	2092850	1885630	1782280	2048460	2029920	2239290
Q9P0L0	Q9P0L0;Q9P0L0-2	VAPA_HUMAN	VAPA	Vesicle-associated membrane protein-associated protein A	1443920	1633430	1750590	2186240	3073710	1454050
Q9H9Q2	Q9H9Q2;A0A087X1P5;J3KQ34;J3QT73;Q9H9Q2-2	CSN7B_HUMAN	COPS7B	COP9 signalosome complex subunit 7b	1979180	2241280	2109540	1988370	2425970	2152870
P08754	P08754	GNAI3_HUMAN	GNAI3	Guanine nucleotide-binding protein G(k) subunit alpha	1881730	1968670	2427520	2266880	1868400	2069400
Q6XZF7;Q6XZF7-2	Q6XZF7;A0A1B0GTX1;A0A1C7CYY6;Q6XZF7-2	DNMBP-2_HUMAN;DNMBP_HUMAN	DNMBP	Dynamin-binding protein	2313150	2116470	2116710	1695140	1949310	2155710
P27361	P27361;B3KR49;E9PBK7;E9PJF0;E9PQW4;H0YDH9;P27361-2;P27361-3	MK03_HUMAN	MAPK3	Mitogen-activated protein kinase 3	2206170	2153750	2013470	2028850	2130530	1870280
Q7L9L4;Q7L9L4-2;Q9H8S9	Q7L9L4;Q9H8S9;D6RCK3;Q7L9L4-2;Q9H8S9-2	MOB1A_HUMAN;MOB1B-2_HUMAN;MOB1B_HUMAN	MOB1A;MOB1B	MOB kinase activator 1B	2057330	2178090	2426790	1997270	2006890	2074960
Q13162	Q13162;A6NG45	PRDX4_HUMAN	PRDX4	Peroxiredoxin-4	2085340	2167250	1909130	2474980	2254380	2170580
Q92918;Q92918-2	Q92918;K7EKT6;K7ER95;Q92918-2	M4K1-2_HUMAN;M4K1_HUMAN	MAP4K1	Mitogen-activated protein kinase kinase kinase kinase 1	1991000	2186300	2645920	2060700	2107100	1669530
P53384;P53384-2	P53384;I3L3A0;P53384-2	NUBP1-2_HUMAN;NUBP1_HUMAN	NUBP1	Cytosolic Fe-S cluster assembly factor NUBP1	2116560	2084500	2061800	2398310	2325740	2151210
P16219	P16219;E9PE82	ACADS_HUMAN	ACADS	Short-chain specific acyl-CoA dehydrogenase, mitochondrial	1351440	2034600	2211330	2281490	1814880	2162890
P16220;P16220-2	P16220;P18846;E9PAR2;G5E998;P16220-2;P16220-3;P18846-2;Q03060-21;Q03060-23;Q03060-24;Q03060-26;Q03060-31;Q03060-32;Q03060-6;Q03060-8;Q03060-9	CREB1-2_HUMAN;CREB1_HUMAN	CREB1	Cyclic AMP-responsive element-binding protein 1	2109970	2132650	1977090	1987280	1995750	1987890
Q9C005	Q9C005	DPY30_HUMAN	DPY30	Protein dpy-30 homolog	1779810	2405260	2537470	2350240	2683440	2638310
Q53H96;Q53H96-2	Q53H96;A0A0A0MQS1;Q53H96-2	P5CR3-2_HUMAN;P5CR3_HUMAN	PYCR3	Pyrroline-5-carboxylate reductase 3	2522360	2044710	1861820	2044660	2012840	2276020
P19174-2	P19174;P19174-2;V9GY71;V9GYH5	PLCG1-2_HUMAN	PLCG1	Isoform of P19174, Isoform 2 of 1-phosphatidylinositol 4,5-bisphosphate phosphodiesterase gamma-1	1937050	2188720	2450730	1923930	2294910	1797420
Q9NWQ8	Q9NWQ8	PHAG1_HUMAN	PAG1	Phosphoprotein associated with glycosphingolipid-enriched microdomains 1	1888580	2066110	2417020	2572930	1731350	2044290
Q6YP21;Q6YP21-3	Q6YP21;A0A0A0MRN7;Q6YP21-3	KAT3-3_HUMAN;KAT3_HUMAN	KYAT3	Kynurenine--oxoglutarate transaminase 3	2351350	2017120	2047130	1950390	2061300	2029050
O43290	O43290	SNUT1_HUMAN	SART1	U4/U6.U5 tri-snRNP-associated protein 1	1705320	1917950	2087470	2111540	2219810	2224380
O60502	O60502;H7C3X0;O60502-2;O60502-3;O60502-4	OGA_HUMAN	OGA	Protein O-GlcNAcase	1917740	2250410	1930470	2389130	1922280	2450250
P49662	P49662;Q6UXS9;A0A384DVP2;P49662-2;Q6UXS9-3	CASP4_HUMAN	CASP4	Caspase-4	2341940	2491100	2063990	2130250	1651000	2261260
O60749	O60749;D6RC15;O60749-2	SNX2_HUMAN	SNX2	Sorting nexin-2	2226360	2276230	2123200	1990460	1733730	2195830
Q9NRP2	Q9NRP2;A0A494C0Z3;H3BN28;H3BNN8;H3BP68;H3BPP2;H3BRC3;H3BTB6;A0A494C090	COXM2_HUMAN	CMC2	COX assembly mitochondrial protein 2 homolog	2099640	2430980	2223400	2280940	2024100	1906330
Q9BXS5	Q9BXS5;E7ENJ6;K7EJL1;Q9BXS5-2	AP1M1_HUMAN	AP1M1	AP-1 complex subunit mu-1	2228530	2415090	2264340	2090810	1947300	1889690
Q9UEY8;Q9UEY8-2	Q9UEY8;Q9UEY8-2	ADDG-2_HUMAN;ADDG_HUMAN	ADD3	Gamma-adducin	2244700	2328600	2252190	1825010	1960380	2126000
P19387	P19387	RPB3_HUMAN	POLR2C	DNA-directed RNA polymerase II subunit RPB3	2196420	2205430	2079420	2376310	2075240	2408570
P56134;P56134-2;P56134-3;P56134-4	P56134;C9JJT5;C9JU26;P56134-2;P56134-3;P56134-4;G3V325	ATPK-2_HUMAN;ATPK-3_HUMAN;ATPK-4_HUMAN;ATPK_HUMAN	ATP5MF	ATP synthase subunit f, mitochondrial	1873720	1863200	2297450	1888680	2233460	1806540
P24539	P24539;Q5QNZ2	AT5F1_HUMAN	ATP5PB	ATP synthase F(0) complex subunit B1, mitochondrial	1564490	1934270	2200500	2168970	2236850	1605320
O75934	O75934	SPF27_HUMAN	BCAS2	Pre-mRNA-splicing factor SPF27	1979080	2359180	2023250	2360820	2174670	2257640
P35813;P35813-3	P35813;E9PJN3;E9PKB5;E9PL75;P35813-2;P35813-3	PPM1A-3_HUMAN;PPM1A_HUMAN	PPM1A	Protein phosphatase 1A	2367050	2332680	2235020	2180510	2187770	2297530
Q9Y639;Q9Y639-1;Q9Y639-3;Q9Y639-4;Q9Y639-5	Q9Y639;H3BU51;Q9UFM8;Q9Y639-1;Q9Y639-3;Q9Y639-4;Q9Y639-5	NPTN-1_HUMAN;NPTN-3_HUMAN;NPTN-4_HUMAN;NPTN-5_HUMAN;NPTN_HUMAN	NPTN	Neuroplastin	2315400	1626650	2191180	2344520	1909810	2252090
P63173	P63173;J3KT73;J3QL01	RL38_HUMAN	RPL38	60S ribosomal protein L38	1789930	1766780	1661510	2191230	2374140	1958970
P09234	P09234;A0A0A0MRR7	RU1C_HUMAN	SNRPC	U1 small nuclear ribonucleoprotein C	2264240	2477650	2150140	2161330	1778730	1903180
Q9UIQ6;Q9UIQ6-2;Q9UIQ6-3	Q9UIQ6;Q9UIQ6-2;Q9UIQ6-3	LCAP-2_HUMAN;LCAP-3_HUMAN;LCAP_HUMAN	LNPEP	Leucyl-cystinyl aminopeptidase	1456920	2272510	2437590	2256380	2020540	1780800
Q8NBJ7	Q8NBJ7;A0A494C1B1;A8MXB9;C9J660;C9JL30;F8WA42;H7C3B2;J3KQJ1;Q8NBJ7-2;Q8NBJ7-3	SUMF2_HUMAN	SUMF2	Inactive C-alpha-formylglycine-generating enzyme 2	2220940	1556670	1985590	2549170	2359530	1811310
O00160	O00160	MYO1F_HUMAN	MYO1F	Unconventional myosin-If	1811540	1680670	2503110	2118520	2346810	1951380
P17252	P17252	KPCA_HUMAN	PRKCA	Protein kinase C alpha type	1692200	2141510	2071690	2076520	2029770	2072020
P13612	P13612	ITA4_HUMAN	ITGA4	Integrin alpha-4	3067450	2131310	1887710	2564640	1782230	1762080
Q3ZCQ8;Q3ZCQ8-2	Q3ZCQ8;M0R003;M0R0C3;M0R2F8;Q3ZCQ8-2;Q3ZCQ8-3	TIM50-2_HUMAN;TIM50_HUMAN	TIMM50	Mitochondrial import inner membrane translocase subunit TIM50	2200320	2232950	2118350	2093810	1752310	1782470
Q9BZQ8	Q9BZQ8	NIBAN_HUMAN	FAM129A	Protein Niban	2271050	1848990	2341500	2387860	1871270	2294880
P15586	P15586;F5H4C6;F6S8M0;H0YFA9;H7C3P4;P15586-2	GNS_HUMAN	GNS	N-acetylglucosamine-6-sulfatase	1893420	1830410	2229770	1899580	2181450	1960010
Q05048	Q05048	CSTF1_HUMAN	CSTF1	Cleavage stimulation factor subunit 1	2125400	2003110	1888380	2090420	1802830	2081970
O43592	O43592;F8WDU6	XPOT_HUMAN	XPOT	Exportin-T	2213020	2293730	2123760	2066540	2036390	2011900
O75475	O75475	PSIP1_HUMAN	PSIP1	PC4 and SFRS1-interacting protein	1529610	1598780	1755050	1769830	3083110	1870290
Q96K76-4	Q96K76;Q96K76-2;Q96K76-4	UBP47-4_HUMAN	USP47	Isoform of Q96K76, Isoform 4 of Ubiquitin carboxyl-terminal hydrolase 47	2087720	2130670	1901180	2166990	2326030	2131310
Q06203	Q06203;D6RCC8	PUR1_HUMAN	PPAT	Amidophosphoribosyltransferase	1773390	1560710	1431050	2021830	2572100	2273380
Q9UKK3	Q9UKK3	PARP4_HUMAN	PARP4	Protein mono-ADP-ribosyltransferase PARP4	1884960	2080500	2540600	2284280	1494000	2072150
Q13291;Q13291-2;Q13291-3;Q13291-4	Q13291;Q13291-2;Q13291-3;Q13291-4;Q96QJ2	SLAF1-2_HUMAN;SLAF1-3_HUMAN;SLAF1-4_HUMAN;SLAF1_HUMAN	SLAMF1	Signaling lymphocytic activation molecule	2249970	1539740	2094130	2277570	1276300	1543690
Q9BVC6	Q9BVC6	TM109_HUMAN	TMEM109	Transmembrane protein 109	1238740	1355670	1599540	1857600	3294060	1429550
Q9H2J4	Q9H2J4;H7BZP2	PDCL3_HUMAN	PDCL3	Phosducin-like protein 3	2165290	2509020	2106610	2428710	1858440	2415990
Q15628	Q15628	TRADD_HUMAN	TRADD	Tumor necrosis factor receptor type 1-associated DEATH domain protein	1919010	1710630	2284710	2114790	2220060	2289040
P55160	P55160;F8W050;P55160-2	NCKPL_HUMAN	NCKAP1L	Nck-associated protein 1-like	1926690	2145830	2417710	2018490	2057960	1784760
L0R6Q1	L0R6Q1	S35U4_HUMAN	SLC35A4	Isoform of Q96G79, SLC35A4 upstream open reading frame protein	1732080	2200320	1956110	1749220	1583050	1892730
Q99747	Q99747;Q99747-2	SNAG_HUMAN	NAPG	Gamma-soluble NSF attachment protein	2346370	2032540	1946350	2342260	2020880	2244280
Q9Y6Y8	Q9Y6Y8	S23IP_HUMAN	SEC23IP	SEC23-interacting protein	2076620	2236550	2055600	1981970	1985580	1985760
P36543	P36543;Q96A05;C9J8H1;P36543-2;P36543-3	VATE1_HUMAN	ATP6V1E1	V-type proton ATPase subunit E 1	1974370	1956930	2053200	1861990	1897860	1951810
Q14C86;Q14C86-2;Q14C86-4;Q14C86-5;Q14C86-6	Q14C86;A0A0A0MQV8;B0QZ65;B4DGD8;C9IZ08;F8W9S7;H0Y7I9;Q14C86-2;Q14C86-3;Q14C86-4;Q14C86-5;Q14C86-6	GAPD1-2_HUMAN;GAPD1-4_HUMAN;GAPD1-5_HUMAN;GAPD1-6_HUMAN;GAPD1_HUMAN	GAPVD1	GTPase-activating protein and VPS9 domain-containing protein 1	2044240	2159280	2026630	2048570	2139680	1972720
P55265;P55265-4	P55265;A0A3B3IRQ9;A0A3B3ISX1;H0YCK3;P55265-2;P55265-3;P55265-4;P55265-5	DSRAD-4_HUMAN;DSRAD_HUMAN	ADAR	Double-stranded RNA-specific adenosine deaminase	1934110	2140640	2077140	2178800	2101880	2141240
A0A5B9;P01850	A0A5B9;P01850;A0A0G2JMB4	TRBC1_HUMAN;TRBC2_HUMAN	TRBC1;TRBC2	T cell receptor beta constant 2	1722720	2111000	2292430	2167980	2341300	1966030
O14964	O14964;I3L1P5;O14964-2	HGS_HUMAN	HGS	Hepatocyte growth factor-regulated tyrosine kinase substrate	1977450	2151390	1945360	2074500	2245810	2256180
Q9NR46	Q9NR46;B7ZC38;B7ZC39;Q9NR46-2	SHLB2_HUMAN	SH3GLB2	Endophilin-B2	2122050	2119560	2068820	1888510	2124780	1765930
P49863	P49863	GRAK_HUMAN	GZMK	Granzyme K	1332890	1185350	2766330	2454410	3268300	1545050
P04150;P04150-2;P04150-3;P04150-6;P04150-8;P04150-9	P04150;A0A494C0P1;D6RDA9;P04150-10;P04150-2;P04150-3;P04150-5;P04150-6;P04150-7;P04150-8;P04150-9;Q3MSN4	GCR-2_HUMAN;GCR-3_HUMAN;GCR-6_HUMAN;GCR-8_HUMAN;GCR-9_HUMAN;GCR_HUMAN	NR3C1	Glucocorticoid receptor	1809280	2158170	1837030	1764770	2298200	2123060
Q9BV40	Q9BV40;B8ZZT4	VAMP8_HUMAN	VAMP8	Vesicle-associated membrane protein 8	1354360	2043380	2147100	2068360	1911200	1675090
Q8WVB3	Q8WVB3;J3KS46;J3QKL0;Q8WVB3-2	HEXD_HUMAN	HEXD	Hexosaminidase D	2130270	1692840	1965180	1844480	2072280	2029370
P05161	P05161;A0A096LNZ9;A0A096LPJ4	ISG15_HUMAN	ISG15	Ubiquitin-like protein ISG15	2041910	1577610	1883000	1619220	1810980	1799730
Q06210;Q06210-2	Q06210;Q06210-2	GFPT1-2_HUMAN;GFPT1_HUMAN	GFPT1	Glutamine--fructose-6-phosphate aminotransferase [isomerizing] 1	1932660	2173960	1869720	1969670	2119350	2229660
Q9UGP4	Q9UGP4;C9JRJ5	LIMD1_HUMAN	LIMD1	LIM domain-containing protein 1	2086200	2020230	1808850	2151030	2150390	2167840
P46459	P46459;I3L0N3;P46459-2	NSF_HUMAN	NSF	Vesicle-fusing ATPase	2188250	1724160	2042570	1729270	2008850	2190530
Q14739	Q14739;A0A494C1L1;C9JXK0	LBR_HUMAN	LBR	Delta(14)-sterol reductase	1512810	1195270	1664290	1846660	3430860	1425570
Q9P2R3;Q9P2R3-4	Q9P2R3;Q9P2R3-2;Q9P2R3-4	ANFY1-4_HUMAN;ANFY1_HUMAN	ANKFY1	Rabankyrin-5	2136040	2286320	2175320	1960550	1734970	2070630
Q86YP4;Q86YP4-3	Q86YP4;C9JGN4;C9JHD7;C9JJK9;C9JMI3;C9JVY3;H7C3H1;Q86YP4-2;Q86YP4-3;V9GY85;V9GYX5	P66A-3_HUMAN;P66A_HUMAN	GATAD2A	Transcriptional repressor p66-alpha	2106250	2015160	1967340	2333240	2240630	2309150
O43566	O43566;H0Y8W3;O43566-4;O43566-5;O43566-6	RGS14_HUMAN	RGS14	Regulator of G-protein signaling 14	1943800	2250730	2240240	2011580	1939030	2015110
P07919	P07919	QCR6_HUMAN	UQCRH	Cytochrome b-c1 complex subunit 6, mitochondrial	1750580	1841650	2153990	2603540	2344950	2522870
O43172;O43172-2	O43172;O43172-2	PRP4-2_HUMAN;PRP4_HUMAN	PRPF4	U4/U6 small nuclear ribonucleoprotein Prp4	2093870	2058380	1878700	1863350	1823650	2135650
O00567	O00567;A0A494C128;H0Y653;H0YDU4	NOP56_HUMAN	NOP56	Nucleolar protein 56	1395840	1394780	1731480	2230220	2621750	2121020
P06493	P06493;A0A024QZP7;A0A087WZZ9;E5RIU6;P06493-2	CDK1_HUMAN	CDK1	Cyclin-dependent kinase 1	2102560	2090470	1675640	2191110	1318950	1867410
Q70J99	Q70J99;K7EIH3;K7EN81;K7EQ37;Q70J99-2;Q70J99-3	UN13D_HUMAN	UNC13D	Protein unc-13 homolog D	1844700	2089060	2371210	2006190	2091820	1702700
Q96J01	Q96J01;D6RGZ2;Q96J01-2	THOC3_HUMAN	THOC3	THO complex subunit 3	2072260	2281590	1853540	1791900	2197540	1884130
O43324	O43324	MCA3_HUMAN	EEF1E1	Eukaryotic translation elongation factor 1 epsilon-1	1718790	2047180	2095620	2038290	2100530	2045340
Q04446	Q04446;E9PGM4	GLGB_HUMAN	GBE1	1,4-alpha-glucan-branching enzyme	1836110	1955990	1674890	2115110	2313780	2137720
Q4VC31	Q4VC31;C9JBU9;C9JQ41;H7C525	CCD58_HUMAN	CCDC58	Coiled-coil domain-containing protein 58	1775980	2099630	1581600	2022510	2149660	2090430
Q9BT23	Q9BT23;J3KRR0;J3QL69;J3QQM5	LIMD2_HUMAN	LIMD2	LIM domain-containing protein 2	2351990	2235850	1881720	2080220	1455400	2005550
P09693	P09693;A8MUH3	CD3G_HUMAN	CD3G	T-cell surface glycoprotein CD3 gamma chain	2334000	2335870	2409990	1933700	2203580	1920090
O43678	O43678	NDUA2_HUMAN	NDUFA2	NADH dehydrogenase [ubiquinone] 1 alpha subcomplex subunit 2	2013410	2027690	1786190	1780610	1926640	2230640
Q5JSP0	Q5JSP0	FGD3_HUMAN	FGD3	FYVE, RhoGEF and PH domain-containing protein 3	1992080	2086310	1914820	1800500	1869260	1994730
P50749	P50749	RASF2_HUMAN	RASSF2	Ras association domain-containing protein 2	1837000	1936070	2323460	2118030	1955140	2065420
P34896;P34896-2	P34896;A0A087WTD8;J3KRZ5;P34896-2;P34896-3	GLYC-2_HUMAN;GLYC_HUMAN	SHMT1	Serine hydroxymethyltransferase, cytosolic	2330670	2202100	1940600	1603600	2523300	1209280
O60826	O60826	CCD22_HUMAN	CCDC22	Coiled-coil domain-containing protein 22	2215880	2149390	1958450	1951150	1973720	1995870
Q5R3I4	Q5R3I4	TTC38_HUMAN	TTC38	Tetratricopeptide repeat protein 38	1984840	1876450	1580570	1659880	2380450	2495020
Q9Y316;Q9Y316-3	Q9Y316;Q9Y316-2;Q9Y316-3	MEMO1-3_HUMAN;MEMO1_HUMAN	MEMO1	Protein MEMO1	2179070	1920370	1942440	1873380	1896210	1932920
P04233-2	P04233;H0YBZ2;P04233-2	HG2A-2_HUMAN	CD74	Isoform of P04233, Isoform 2 of HLA class II histocompatibility antigen gamma chain	1630430	1477800	1776500	2878700	1550140	1562770
Q99615;Q99615-2	Q99615;K7EIH8;K7EPP7;K7ESP1;Q99615-2	DNJC7-2_HUMAN;DNJC7_HUMAN	DNAJC7	DnaJ homolog subfamily C member 7	1817510	1879220	2067780	2236330	1819540	2009650
P02788;P02788-2	P02788;E7EQB2;E7ER44;P02788-2	TRFL-2_HUMAN;TRFL_HUMAN	LTF	Lactotransferrin	1440270	1243950	1097150	1704160	857120	1847830
Q15653;Q15653-2	Q15653;G5E9C2;I3L4X3;Q15653-2	IKBB-2_HUMAN;IKBB_HUMAN	NFKBIB	NF-kappa-B inhibitor beta	1889460	2083750	2109520	2319550	2240920	2386480
Q99961	Q99961;Q99962;M0QYE0;M0R0I3;Q99961-3	SH3G1_HUMAN	SH3GL1	Endophilin-A2	2403690	1979000	2036620	1827530	1849610	1793710
O94776	O94776	MTA2_HUMAN	MTA2	Metastasis-associated protein MTA2	1682750	1677190	1636610	2210560	2552960	2240730
P55327;P55327-2;P55327-3;P55327-4;P55327-5;P55327-6;P55327-7	P55327;E5RFR7;H0YC44;P55327-2;P55327-3;P55327-4;P55327-5;P55327-6;P55327-7;P55327-8;H0YC42	TPD52-2_HUMAN;TPD52-3_HUMAN;TPD52-4_HUMAN;TPD52-5_HUMAN;TPD52-6_HUMAN;TPD52-7_HUMAN;TPD52_HUMAN	TPD52	Tumor protein D52	1817850	1870810	1759960	1638720	2179430	2426330
P31483	P31483;C9JTN7;F8W8I6;P31483-2;P31483-3	TIA1_HUMAN	TIA1	Nucleolysin TIA-1 isoform p40	1918720	2011580	1874200	2015280	1839960	2009680
P01903	A0A0G2JMH6;P01903;P01906;A0A0G2JH46;A0A140TA34;A0A1W2PP70;Q08AS3;Q30118;Q5Y7H0	DRA_HUMAN	HLA-DRA	HLA class II histocompatibility antigen, DR alpha chain	1268730	1447520	1871990	3662960	1431010	1645440
P19388	P19388;A0A087WVZ9;A0A0A0MQR7	RPAB1_HUMAN	POLR2E	DNA-directed RNA polymerases I, II, and III subunit RPABC1	2202500	1989790	1846460	1974310	1787660	2076570
Q9H6Z4;Q9H6Z4-2;Q9H6Z4-3	Q9H6Z4;B7Z7F3;K7EIJ4;Q9H6Z4-2;Q9H6Z4-3	RANB3-2_HUMAN;RANB3-3_HUMAN;RANB3_HUMAN	RANBP3	Ran-binding protein 3	1926570	2206120	2079310	2218790	2234700	2191450
O95816	O95816;O95816-2	BAG2_HUMAN	BAG2	BAG family molecular chaperone regulator 2	1967330	2209030	1947920	1619980	2402050	2107920
Q14511;Q14511-3	Q14511;A0A087WUD2;Q14511-3	CASL-3_HUMAN;CASL_HUMAN	NEDD9	Enhancer of filamentation 1	1927000	1891420	2072710	1944570	1639450	2020950
Q9HCS7	Q9HCS7	SYF1_HUMAN	XAB2	Pre-mRNA-splicing factor SYF1	1887970	2340110	2271400	2225420	1765290	2045570
Q9P016	Q9P016	THYN1_HUMAN	THYN1	Thymocyte nuclear protein 1	1597630	1771830	1907350	1679050	2183950	2128410
Q5TDH0;Q5TDH0-3	Q5TDH0;H0YI90;H0YII4;Q5TDH0-2;Q5TDH0-3	DDI2-3_HUMAN;DDI2_HUMAN	DDI2	Protein DDI1 homolog 2	1709150	2072940	1838060	2122580	2077560	2230540
Q92905	Q92905;E5RHF2;E5RHH5	CSN5_HUMAN	COPS5	COP9 signalosome complex subunit 5	2018140	2071630	2052600	1921840	2030600	2253890
Q96JD6;Q96JD6-4	Q96JD6;G3V1C1;Q96JD6-4	AKCL2-4_HUMAN;AKCL2_HUMAN	AKR1E2	1,5-anhydro-D-fructose reductase		6247360		5571900
Q9BZK7	O60907;Q9BQ87;Q9BZK7;A0A0D9SF63;A0A2R8YFW3;A0A494C153;O60907-2	TBL1R_HUMAN	TBL1XR1	F-box-like/WD repeat-containing protein TBL1XR1	1966400	2139780	1863560	2207070	2190640	2240970
Q03013;Q03013-2	Q03013;A0A0A0MR85;A6NNT0;Q03013-2;Q03013-3	GSTM4-2_HUMAN;GSTM4_HUMAN	GSTM4	Glutathione S-transferase Mu 4		3426230	2971390	1596920		1905340
Q9NY12;Q9NY12-2	Q9NY12;Q9NY12-2	GAR1-2_HUMAN;GAR1_HUMAN	GAR1	H/ACA ribonucleoprotein complex subunit 1	2034700	1883250	1688360	2011260	2221840	2231310
Q00534	Q00534	CDK6_HUMAN	CDK6	Cyclin-dependent kinase 6	1848420	1931130	2167450	2085930	1967900	2011180
Q9Y371;Q9Y371-2	Q9Y371;A0A087WW40;Q9Y371-2	SHLB1-2_HUMAN;SHLB1_HUMAN	SH3GLB1	Endophilin-B1	1940770	1673080	1967060	1690610	1824770	1995400
Q53HC9	Q53HC9;A8MUM1;C9JVR6	EIPR1_HUMAN	EIPR1	EARP and GARP complex-interacting protein 1	1992360	2463800	1912560	2151930	2309010	2199850
Q9NZK5	Q9NZK5;A0A087X0I3;B4E3Q4;Q9NZK5-2	ADA2_HUMAN	ADA2	Adenosine deaminase 2	1623930	1746610	2971190	1333260	1452160	1601380
P41226	P41226	UBA7_HUMAN	UBA7	Ubiquitin-like modifier-activating enzyme 7	1557570	1990000	2145240	1725730	2420560	1814180
Q7Z3D6;Q7Z3D6-2	Q7Z3D6;A0A0C4DGD4;H0YB09;H0YB62;Q7Z3D6-2;Q7Z3D6-3;Q7Z3D6-4;Q7Z3D6-5	GLUCM-2_HUMAN;GLUCM_HUMAN	DGLUCY	D-glutamate cyclase, mitochondrial	2153210	1678240		1321010	2186800	3053040
O95168	O95168;C9JXQ9;F2Z3P9;O95168-2	NDUB4_HUMAN	NDUFB4	NADH dehydrogenase [ubiquinone] 1 beta subcomplex subunit 4	1302110	1689690	1953440	1887100	2093240	1957180
O94953	O94953;A0A0C4DFL8;F5GX28;O94953-2	KDM4B_HUMAN	KDM4B	Lysine-specific demethylase 4B	1316990	1278590	2354610	2551170	4177940	2663250
Q6XQN6	Q6XQN6;C9J8U2;G5E977;Q6XQN6-2	PNCB_HUMAN	NAPRT	Nicotinate phosphoribosyltransferase	1309240	2309270	2533000	2078000	1952320	1288190
P35249	P35249;C9J8M3;C9JTT7;C9JXZ7;C9JZI1;P35249-2	RFC4_HUMAN	RFC4	Replication factor C subunit 4	1851310	1877010	1721580	2112420	2199100	1810500
Q4G176	Q4G176;A0A3B3ISK9;F5H362;F5H5A1;F5H755	ACSF3_HUMAN	ACSF3	Acyl-CoA synthetase family member 3, mitochondrial	2031970	1953930	1494290	1854770	1849300	2043770
Q9NZB2;Q9NZB2-6	Q9NZB2;Q9NZB2-2;Q9NZB2-4;Q9NZB2-5;Q9NZB2-6	F120A-6_HUMAN;F120A_HUMAN	FAM120A	Constitutive coactivator of PPAR-gamma-like protein 1	1820970	1985110	2184040	2207360	2085960	1713440
O96000	O96000;H3BPJ9	NDUBA_HUMAN	NDUFB10	NADH dehydrogenase [ubiquinone] 1 beta subcomplex subunit 10	1618300	1784390	1830050	1850090	1794680	1727090
Q15631	Q15631;A0A0J9YVW2;E9PGT1;H7C1D4;Q15631-2	TSN_HUMAN	TSN	Translin	1752830	2128950	1918110	1852980	1880040	1979090
P54619;P54619-2;P54619-3	P54619;Q9UGJ0;A0A494C068;A0A494C123;A0A494C1K7;E9PGP6;F8VYY9;H0YHF8;P54619-2;P54619-3;Q9UGJ0-2;Q9UGJ0-3	AAKG1-2_HUMAN;AAKG1-3_HUMAN;AAKG1_HUMAN	PRKAG1	5'-AMP-activated protein kinase subunit gamma-1	1647330	1815470	2058190	2203410	1993400	1953630
P08236;P08236-2	P08236;P08236-2;P08236-3	BGLR-2_HUMAN;BGLR_HUMAN	GUSB	Beta-glucuronidase	1887990	1534710	1755150	1633990	1907150	2248760
Q8WU39	Q8WU39;Q8WU39-3	MZB1_HUMAN	MZB1	Marginal zone B- and B1-cell-specific protein	2327280	1455040	1303470	2079050	2908900	2102570
P36969;P36969-2	P36969;A0A087WT12;A0A087X2I2;K7ERP4;P36969-2	GPX4-2_HUMAN;GPX4_HUMAN	GPX4	Phospholipid hydroperoxide glutathione peroxidase	1577040	1652030	1803840	1933710	1841720	2657810
Q99536	Q99536;K7ESA3;Q99536-2;Q99536-3	VAT1_HUMAN	VAT1	Synaptic vesicle membrane protein VAT-1 homolog	1793120	1872720	2063630	1588190	1782010	2160260
P33176	O60282;P33176;Q12840;A0A0G2JMZ6	KINH_HUMAN	KIF5B	Kinesin-1 heavy chain	1663100	1761350	2244380	1997160	2119800	1802270
P52788	P52788;H7C2R7;P52788-2	SPSY_HUMAN	SMS	Spermine synthase	1673170	1673380	1589090	2154640	2225500	1873510
O76071	O76071	CIAO1_HUMAN	CIAO1	Probable cytosolic iron-sulfur protein assembly protein CIAO1	2064340	1976700	1849330	2162070	2011440	1915830
P17812	P17812;Q9NRF8;A0A3B3IRI2;A0A3B3IRQ8;A0A3B3ITB8;A0A3B3ITF6;A0A3B3ITH9	PYRG1_HUMAN	CTPS1	CTP synthase 1	2015950	2093430	1791600	2041090	2149060	1849810
O75439	O75439;F8WAZ6;F8WBE1;F8WEA6;G3V0E4	MPPB_HUMAN	PMPCB	Mitochondrial-processing peptidase subunit beta	1867320	1959990	1879950	2150600	1987450	1977150
Q6Y288	Q6Y288	B3GLT_HUMAN	B3GLCT	Beta-1,3-glucosyltransferase	2663340	2534400	1670100	1689050	1643740	1928490
O43920	O43920	NDUS5_HUMAN	NDUFS5	NADH dehydrogenase [ubiquinone] iron-sulfur protein 5	1450300	1608810	1865340	1834110	2144920	2000870
Q9NWZ3	Q9NWZ3;A0A0R4J2F4;Q9NWZ3-2	IRAK4_HUMAN	IRAK4	Interleukin-1 receptor-associated kinase 4	2016610	2084970	2007000	1871520	2200880	2003820
Q9UMX5	Q9UMX5	NENF_HUMAN	NENF	Neudesin	1839160	2011210	1617860	2336690	1985170	1874930
P02792	P02792	FRIL_HUMAN	FTL	Ferritin light chain	1812590	1103090	1992810	1916680	1704790	2171760
Q8WWY3	Q8WWY3;E7EVX8	PRP31_HUMAN	PRPF31	U4/U6 small nuclear ribonucleoprotein Prp31	1738090	1869080	1923500	1933470	2050580	2014980
O14929	O14929;O14929-2	HAT1_HUMAN	HAT1	Histone acetyltransferase type B catalytic subunit	2008020	2144820	1831100	2288080	1745200	1574930
P98171;P98171-2	P98171;E7EQN5;E9PCM6;H7C3K8;P98171-2	RHG04-2_HUMAN;RHG04_HUMAN	ARHGAP4	Rho GTPase-activating protein 4	1854760	1843510	2208590	1654300	1928900	1790360
Q9Y6G9	Q9Y6G9;E9PHI6	DC1L1_HUMAN	DYNC1LI1	Cytoplasmic dynein 1 light intermediate chain 1	2096970	1945950	1924760	1796990	1940610	1963350
P30876	P30876;A0A1W2PPT5;C9J2Y9;C9J4M6	RPB2_HUMAN	POLR2B	DNA-directed RNA polymerase II subunit RPB2	1833370	1890880	2053930	1882690	1861850	1765850
Q9UPN3	Q9UPN3;E9PLY5;E9PNZ4;H0Y390;H3BPE1;H3BQK9;Q9UPN3-2;Q9UPN3-3;Q9UPN3-4	MACF1_HUMAN	MACF1	Microtubule-actin cross-linking factor 1, isoforms 1/2/3/5	1698310	1952710	1980190	2234600	1960170	1487760
O95373	O95373	IPO7_HUMAN	IPO7	Importin-7	2000360	1944310	1850960	2216810	1853100	1727540
Q8IXQ6-2	Q8IXQ6;G5E9U8;Q8IXQ6-2	PARP9-2_HUMAN	PARP9	Isoform of Q8IXQ6, Isoform 2 of Protein mono-ADP-ribosyltransferase PARP9	1629790	2105850	1838720	1856380	1552520	1521010
O15067	O15067;H0YGH1	PUR4_HUMAN	PFAS	Phosphoribosylformylglycinamidine synthase	1918120	2131540	1687020	1795100	2231770	1929230
P14735	P14735;A0A3B3ISG5;Q5T5N3	IDE_HUMAN	IDE	Insulin-degrading enzyme	2090950	1960360	2076830	1937410	1690150	1760980
O43583	O43583	DENR_HUMAN	DENR	Density-regulated protein	1399810	1521510	1669940	1735990	2306290	1638510
P31689	P31689	DNJA1_HUMAN	DNAJA1	DnaJ homolog subfamily A member 1	1605850	1604370	1786760	2027090	1589000	1836300
P53990;P53990-2;P53990-3;P53990-4;P53990-5	P53990;H3BMU1;H3BUI0;J3KR23;P53990-2;P53990-3;P53990-4;P53990-5;P53990-6	IST1-2_HUMAN;IST1-3_HUMAN;IST1-4_HUMAN;IST1-5_HUMAN;IST1_HUMAN	IST1	IST1 homolog	1805140	1864680	2124250	1765400	1763690	1986220
Q13409-2;Q13409-3	Q13409;Q13409-2;Q13409-3;Q13409-5;Q13409-6;Q13409-7	DC1I2-2_HUMAN;DC1I2-3_HUMAN	DYNC1I2	Isoform of Q13409, Isoform 2B of Cytoplasmic dynein 1 intermediate chain 2	1823770	1977480	1984160	1870510	2034370	1865620
P31350;P31350-2	P31350;A0A286YFD6;P31350-2	RIR2-2_HUMAN;RIR2_HUMAN	RRM2	Ribonucleoside-diphosphate reductase subunit M2	2074290	1817320	1757500	2458800	1395390	2302390
P05771-2	P05771;I3L148;P05771-2	KPCB-2_HUMAN	PRKCB	Isoform of P05771, Isoform Beta-II of Protein kinase C beta type	1778320	1955970	1906770	1780850	2074870	1965340
Q96T51	Q96T51;H0Y9Y8;J3KPP6;Q96T51-2;Q96T51-3	RUFY1_HUMAN	RUFY1	RUN and FYVE domain-containing protein 1	1814850	2338620	1944140	1922290	2009270	1795200
P41227	P41227;Q9BSU3;A8MWP7;C9JN83;C9JW55;F8W808;H0Y8T0;P41227-2	NAA10_HUMAN	NAA10	N-alpha-acetyltransferase 10	1822230	1909170	1769030	2056920	1941130	1847710
P23919	P23919;H7BZ20;H7C312;P23919-2	KTHY_HUMAN	DTYMK	Thymidylate kinase	2097120	1945640	1655070	1975840	1898680	1842650
Q9Y2X3	Q9Y2X3	NOP58_HUMAN	NOP58	Nucleolar protein 58	1389450	1518120	1746760	2024870	2195210	1766390
O43760;O43760-2	O43760;K7ELS8;O43760-2	SNG2-2_HUMAN;SNG2_HUMAN	SYNGR2	Synaptogyrin-2	1776580	2138750	2007270	1877300	1530670	1624820
P20036	P20036;A0A140T8Z9;A0A140T900;A0A140T909;A0A140T914;A0A140T961;A0A140T968;A0A140T977;A0A140T980;A0A140T992;A0A140T9A6;A0A140T9D6;A0A140T9F8;A0A140T9G7;A0A140T9G9;A0A140T9H1;A0A140T9J4;A0A140T9R4;A0A140T9U1;A0A140T9U4;A0A140T9Y8;A0A140T9Y9;E9PMV2;H0Y6F8;J3KQ99	DPA1_HUMAN	HLA-DPA1	HLA class II histocompatibility antigen, DP alpha 1 chain	1319220	1526060	2969080	2071270	1354500	2307840
P26885	P26885;A0A494C1N0	FKBP2_HUMAN	FKBP2	Peptidyl-prolyl cis-trans isomerase FKBP2	1837190	1501300	1814930	1687890	1744830	1927480
P21291	P21291;E9PS42	CSRP1_HUMAN	CSRP1	Cysteine and glycine-rich protein 1	1965840	1849660	1996380	1841290	1805740	1711010
Q99447;Q99447-3	Q99447;I3L1L9;I3L1R7;I3L2Q1;Q99447-2;Q99447-3;Q99447-4	PCY2-3_HUMAN;PCY2_HUMAN	PCYT2	Ethanolamine-phosphate cytidylyltransferase	2098520	2074430	1895090	1840320	1815070	1964960
Q9NX46	Q9NX46	ARHL2_HUMAN	ADPRHL2	ADP-ribose glycohydrolase ARH3	1712460	1860520	1742350	2010550	2034430	2156280
Q9NUB1;Q9NUB1-2	Q9NUB1;Q9NUB1-2;Q9NUB1-3	ACS2L-2_HUMAN;ACS2L_HUMAN	ACSS1	Acetyl-coenzyme A synthetase 2-like, mitochondrial	1864730	1949090	1532990	1744330	2305980	1279620
Q86YS7;Q86YS7-3	Q86YS7;H0YFC4;Q86YS7-2;Q86YS7-3;Q86YS7-4;Q86YS7-5	C2CD5-3_HUMAN;C2CD5_HUMAN	C2CD5	C2 domain-containing protein 5	2090870	2034050	1866080	1746810	1764810	1774160
Q9Y5V0	Q9Y5V0;E5RHR6;E5RHV4;H0YAP1	ZN706_HUMAN	ZNF706	Zinc finger protein 706	1745020	1676530	1527890	1626120	1672600	1769620
Q9NTX5;Q9NTX5-2	Q9NTX5;E9PIU8;E9PJS8;E9PLY6;E9PPG7;E9PRU6;F2Z2D6;H0Y5L2;J3KP84;Q9NTX5-2;Q9NTX5-5;Q9NTX5-6	ECHD1-2_HUMAN;ECHD1_HUMAN	ECHDC1	Ethylmalonyl-CoA decarboxylase	2022530	1908010	1818060	1539910	1739680	2185200
Q5EG05;Q5EG05-2	Q5EG05;E9PQW1;Q5EG05-2	CAR16-2_HUMAN;CAR16_HUMAN	CARD16	Caspase recruitment domain-containing protein 16	1795470	1886400	1813350	1931540	1667730	1802950
Q05519;Q05519-2	Q05519;Q05519-2;Q5T757;Q5T760	SRS11-2_HUMAN;SRS11_HUMAN	SRSF11	Serine/arginine-rich splicing factor 11	1784190	2026850	1830520	1957350	2045100	2020670
Q9BQ67	Q9BQ67;M0QX71	GRWD1_HUMAN	GRWD1	Glutamate-rich WD repeat-containing protein 1	1861150	2112350	1784850	2202600	1804090	2273970
Q9H1B7	Q9H1B7	I2BPL_HUMAN	IRF2BPL	Probable E3 ubiquitin-protein ligase IRF2BPL	1633800	1801630	1874360	1748060	2108750	1923400
Q7L2H7	Q7L2H7;E9PN86;J3KNJ2	EIF3M_HUMAN	EIF3M	Eukaryotic translation initiation factor 3 subunit M	1904370	2058130	1989160	1939100	1733070	1728480
P43897	P43897;P43897-2	EFTS_HUMAN	TSFM	Elongation factor Ts, mitochondrial	1685800	1917230	1864360	1890930	1934610	1825870
P20839;P20839-3;P20839-5;P20839-6;P20839-7	P20839;C9J381;P20839-2;P20839-3;P20839-4;P20839-5;P20839-6;P20839-7	IMDH1-3_HUMAN;IMDH1-5_HUMAN;IMDH1-6_HUMAN;IMDH1-7_HUMAN;IMDH1_HUMAN	IMPDH1	Inosine-5'-monophosphate dehydrogenase 1	2096960	1878270	1868920	1776390	1942620	1885110
Q9NQC7;Q9NQC7-2	Q9NQC7;J3KRR7;Q9NQC7-2	CYLD-2_HUMAN;CYLD_HUMAN	CYLD	Ubiquitin carboxyl-terminal hydrolase CYLD	1807550	1834100	1972110	1819080	1970540	1960190
O95865	O95865;A0A140T971;H0Y7N1;Q5SRR8;Q5SSV3	DDAH2_HUMAN	DDAH2	N(G),N(G)-dimethylarginine dimethylaminohydrolase 2	1724450	1333810	1605610	1775480	2746950	2222920
P41236	P41236;E7EMN6;E7EUI7	IPP2_HUMAN	PPP1R2	Protein phosphatase inhibitor 2	1691150	1834650	1903570	1942700	2189430	1999400
Q6NZY4	Q6NZY4;F5GX80;F5H6J5;Q6NZY4-2	ZCHC8_HUMAN	ZCCHC8	Zinc finger CCHC domain-containing protein 8	2051640	2034700	1832890	1862740	1926380	2041730
Q13464	Q13464;A0A0U1RQV4	ROCK1_HUMAN	ROCK1	Rho-associated protein kinase 1	1528700	1535870	2083820	1778630	2043440	1774550
Q16512;Q16512-2	Q16512;K7EL10;Q16512-2	PKN1-2_HUMAN;PKN1_HUMAN	PKN1	Serine/threonine-protein kinase N1	1790300	2040660	2055410	2059360	1853380	1866970
P10155	P10155;P10155-3;P10155-4;P10155-5	RO60_HUMAN	RO60	60 kDa SS-A/Ro ribonucleoprotein	1685930	1816270	2008540	1847900	1866730	1855670
O43586	O43586;H0YKY3;H0YLW8;H0YLX8;J3KPG6;O43586-2	PPIP1_HUMAN	PSTPIP1	Proline-serine-threonine phosphatase-interacting protein 1	1998010	1692510	1832590	1800120	1793050	1831750
P50583	P50583	AP4A_HUMAN	NUDT2	Bis(5'-nucleosyl)-tetraphosphatase [asymmetrical]	1840950	1633170	1618890	1720490	2345290	2619190
Q9H4L5-2	Q9H4L5;Q9H4L5-2;Q9H4L5-3;Q9H4L5-4	OSBL3-2_HUMAN	OSBPL3	Isoform of Q9H4L5, Isoform 1b of Oxysterol-binding protein-related protein 3	1996210	2083040	2178870	2027270	1761950	1737490
Q96FV2;Q96FV2-2	Q96FV2;J3KT79;J3QL71;J3QR84;J3QRJ1;Q96FV2-2	SCRN2-2_HUMAN;SCRN2_HUMAN	SCRN2	Secernin-2	1409870	2049830	1559650	1974060	2280170	1700410
P61244;P61244-2	P61244;G3V302;G3V5L1;P61244-2	MAX-2_HUMAN;MAX_HUMAN	MAX	Protein max	1694110	2409970	2133390	2098400	1023260	1915210
Q96GG9	Q96GG9;C9J0B2;C9J8R4;C9JRU6;C9JVE2	DCNL1_HUMAN	DCUN1D1	DCN1-like protein 1	1702000	1972350	1942090	1665860	1766080	1711490
Q13057;Q13057-2	Q13057;K7EN91;K7EPC2;K7ES73;Q13057-2	COASY-2_HUMAN;COASY_HUMAN	COASY	Bifunctional coenzyme A synthase	1977240	1874550	1813450	1623830	1909720	1996450
Q15437	Q15437;A0A2R8YFH5;Q5QPE1	SC23B_HUMAN	SEC23B	Protein transport protein Sec23B	1808510	1792460	1942470	2014120	2016220	1657310
P01033	P01033;H0Y789;Q5H9A7	TIMP1_HUMAN	TIMP1	Metalloproteinase inhibitor 1	1256860	1438650	1393520	2156800	1533200	1741040
O94855;O94855-2	O94855;E9PC44;E9PDM8;O94855-2	SC24D-2_HUMAN;SC24D_HUMAN	SEC24D	Protein transport protein Sec24D	1785580	1657480	1753330	1953530	2149380	1808870
O43815	O43815;O43815-2	STRN_HUMAN	STRN	Striatin	1943540	1930770	1815310	1846380	1850740	1854370
Q9NUQ8	Q9NUQ8;Q9NUQ8-2	ABCF3_HUMAN	ABCF3	ATP-binding cassette sub-family F member 3	1512130	1777290	1815920	1917370	1359520	1825520
Q9UQE7	Q9UQE7	SMC3_HUMAN	SMC3	Structural maintenance of chromosomes protein 3	1604370	1737300	1804120	1730620	1844990	1739760
Q6VY07	Q6VY07;B4DF77;E9PNZ9;Q6VY07-2	PACS1_HUMAN	PACS1	Phosphofurin acidic cluster sorting protein 1	1584660	1900560	2051000	1709010	1946410	2101910
A0A494C0X7;D3DSM0	A0A494C0X7;D3DSM0	A0A494C0X7_HUMAN;D3DSM0_HUMAN	ITGB2	Isoform of P05107, Integrin beta-2	1638010	1802450	2222110	1557690	1583400	1438580
P23921	P23921;E9PL69	RIR1_HUMAN	RRM1	Ribonucleoside-diphosphate reductase large subunit	1727400	2133580	1403170	2298590	1875820	1902990
Q5VYK3	Q5VYK3;J3KN16	ECM29_HUMAN	ECPAS	Proteasome adapter and scaffold protein ECM29	1522490	1797750	1867730	1955080	1854980	1626380
Q9Y2W2	Q9Y2W2	WBP11_HUMAN	WBP11	WW domain-binding protein 11	1753410	1813440	1834180	1777310	1610110	1742560
Q9NR30	Q9NR30;Q9NR30-2	DDX21_HUMAN	DDX21	Nucleolar RNA helicase 2	1088630	839998	988278	2128420	2208400	1876490
O14949	O14949	QCR8_HUMAN	UQCRQ	Cytochrome b-c1 complex subunit 8	1542260	1330470	2195790	1986040	2208810	1916890
A6NFQ2	A0A1B0GVM2;A6NFQ2;A6NFQ2-2;A6NFQ2-3	TCAF2_HUMAN	TCAF2	TRPM8 channel-associated factor 2	1983480	1330830	1805020	2557150	1521930	1816160
Q8IXJ6;Q8IXJ6-2;Q8IXJ6-3	Q8IXJ6;A0A087WYM3;A0A0A0MRF5;B5MCS1;C9J3U7;C9JR33;C9JZQ0;E7EWX6;F8WCF4;Q8IXJ6-2;Q8IXJ6-3;Q8IXJ6-4;Q8IXJ6-5	SIR2-2_HUMAN;SIR2-3_HUMAN;SIR2_HUMAN	SIRT2	NAD-dependent protein deacetylase sirtuin-2	1675220	1741290	2022990	1937060	1650450	1999940
P51553;P51553-2	P51553;E7EQB8;E9PF84;G5E9Q7;H7C1W2;P51553-2	IDH3G-2_HUMAN;IDH3G_HUMAN	IDH3G	Isocitrate dehydrogenase [NAD] subunit gamma, mitochondrial	1705630	1565760	1697400	1687760	1717550	1585920
Q13098;Q13098-5;Q13098-7	Q13098;A0A096LP07;A0A096LPJ3;A8K070;C9JFE4;J3KSA5;Q13098-5;Q13098-6;Q13098-7	CSN1-5_HUMAN;CSN1-7_HUMAN;CSN1_HUMAN	GPS1	COP9 signalosome complex subunit 1	1813950	1948060	1912390	1833860	1816320	1697250
P51659	P51659;A0A2R8YD50;A0A2R8YDT8;A0A2R8YEG2;A0A2R8YF45;E7ER27	DHB4_HUMAN	HSD17B4	Peroxisomal multifunctional enzyme type 2	1785630	1632080	1808580	1717770	2277700	1633880
Q9GZN8;Q9GZN8-2	Q9GZN8;Q9GZN8-2	CT027-2_HUMAN;CT027_HUMAN	C20orf27	UPF0687 protein C20orf27	1947280	1742550	1538780	1804980	1916310	1717690
Q9H0C8	Q9H0C8;E9PC05	ILKAP_HUMAN	ILKAP	Integrin-linked kinase-associated serine/threonine phosphatase 2C	2059580	1965020	1597460	1787690	1759190	2086600
Q9UNH7	Q9UNH7;A0A0A0MRI2;Q9UNH7-2	SNX6_HUMAN	SNX6	Sorting nexin-6	1698270	1937600	1870830	1706280	1358930	1699500
Q14011	Q14011;D6W5Y5;K7EJV1;K7EJV5;K7ELT6;K7ELV6;K7EMY9;K7ENX8;K7EPM4;K7EQR7;K7ER40;Q14011-2	CIRBP_HUMAN	CIRBP	Cold-inducible RNA-binding protein	1345310	1629220	1992990	2020410	1600600	1852890
Q14318	Q14318	FKBP8_HUMAN	FKBP8	Peptidyl-prolyl cis-trans isomerase FKBP8	1796790	1923430	1982330	2052690	1891230	1470620
P35250	P35250;A0A087WVY3;H7C596;H7C5P4;P35250-2	RFC2_HUMAN	RFC2	Replication factor C subunit 2	1807560	1926070	1868080	2073490	1857060	1714800
P60983	P60983;G3V4P8	GMFB_HUMAN	GMFB	Glia maturation factor beta	2023790	1834730	1844140	1814810	1790970	1901160
Q96II8	Q96II8;E9PD99;Q96II8-2;Q96II8-3;Q96II8-4	LRCH3_HUMAN	LRCH3	Leucine-rich repeat and calponin homology domain-containing protein 3	2014220	1800820	1722740	1906400	1695830	1904380
P56211;P56211-2	P56211;H3BMD8;H3BTD3;P56211-2	ARP19-2_HUMAN;ARP19_HUMAN	ARPP19	cAMP-regulated phosphoprotein 19	1386180	1679180	1883070	1779710	1818760	1644440
P78318	P78318	IGBP1_HUMAN	IGBP1	Immunoglobulin-binding protein 1	1917230	1897130	1825750	1904680	1656550	1900170
Q14696	Q14696	MESD_HUMAN	MESD	LRP chaperone MESD	1777640	1617890	1867290	1997010	1721690	1607820
P35914	P35914;P35914-2;P35914-3	HMGCL_HUMAN	HMGCL	Hydroxymethylglutaryl-CoA lyase, mitochondrial	1681870	1644440	1466040	1711500	1983170	1921210
Q32P44	Q32P44;B7WPE2;G3V195;G3V1D0;H0Y3M3;Q32P44-2	EMAL3_HUMAN	EML3	Echinoderm microtubule-associated protein-like 3	1510090	1772350	1873830	1567140	1782790	1613350
O95379-4	O95379;D6RCM8;O95379-2;O95379-3;O95379-4	TFIP8-4_HUMAN	TNFAIP8	Isoform of O95379, Isoform 4 of Tumor necrosis factor alpha-induced protein 8	1863480	1944650	1920910	1793370	1450630	1444600
Q969T9	Q969T9;A6NG10;K7EIJ0;K7EMC9;K7ENL2;Q969T9-2	WBP2_HUMAN	WBP2	WW domain-binding protein 2	1906500	1762100	1810860	1761260	1955620	1885990
P50416	P50416;H3BP22;H3BUV7;P50416-2	CPT1A_HUMAN	CPT1A	Carnitine O-palmitoyltransferase 1, liver isoform	1161750	1349830	1988090	1856070	1690430	1302250
O95721	O95721;C9JAF7	SNP29_HUMAN	SNAP29	Synaptosomal-associated protein 29	1965180	2049290	1667100	1909950	1638560	1959390
Q9Y5L0	Q9Y5L0;C9J7E5;E9PFH4;Q9Y5L0-1;Q9Y5L0-3;Q9Y5L0-5	TNPO3_HUMAN	TNPO3	Transportin-3	1935130	1878790	1965730	1922490	1636280	1664090
Q96BP3	Q96BP3;D6RA12;D6RB19;D6RDA4;D6RHV0	PPWD1_HUMAN	PPWD1	Peptidylprolyl isomerase domain and WD repeat-containing protein 1	1837170	1904250	1873840	1709610	1515420	1792710
Q9NR50	Q9NR50;H0Y580;Q9NR50-2;Q9NR50-3	EI2BG_HUMAN	EIF2B3	Translation initiation factor eIF-2B subunit gamma	1868050	1881950	1730360	1747840	1822550	1843220
Q8NB37	Q8NB37;E9PLI5;E9PQD8;H0YE25;H0YF25;Q8NB37-2	GALD1_HUMAN	GATD1	Glutamine amidotransferase-like class 1 domain-containing protein 1	1735540	1994320	1764660	1793700	1944350	1880710
Q96C36	Q96C36;A0A087WTV6;A0A087WZR9	P5CR2_HUMAN	PYCR2	Pyrroline-5-carboxylate reductase 2	1828340	1543040	1604580	1933650	2326630	1838210
Q9UKF6	Q9UKF6;C9JZH6;G5E9W3	CPSF3_HUMAN	CPSF3	Cleavage and polyadenylation specificity factor subunit 3	1895680	1800630	1783940	2003820	1696980	1994200
Q8TC07-2	Q8TC07;C9JA93;F8VV61;Q8TC07-2;Q8TC07-3	TBC15-2_HUMAN	TBC1D15	Isoform of Q8TC07, Isoform 2 of TBC1 domain family member 15	1702960	1922050	1941070	1820500	1707460	1870670
A0A096LP25	Q6ZSR9;A0A096LP25	A0A096LP25_HUMAN	AAK1	Isoform of Q2M2I8, AP2-associated protein kinase 1 (Fragment)	1622310	1789590	1675130	1854160	1716750	1686610
Q53QZ3	Q53QZ3;B8ZZK0	RHG15_HUMAN	ARHGAP15	Rho GTPase-activating protein 15	1883630	1673780	1892380	1886450	1857550	1746050
Q8IYB5;Q8IYB5-2;Q8IYB5-3	Q8IYB5;A0A087X1X9;Q8IYB5-2;Q8IYB5-3	SMAP1-2_HUMAN;SMAP1-3_HUMAN;SMAP1_HUMAN	SMAP1	Stromal membrane-associated protein 1	1546260	1697450	1833810	1704000	1674480	1863920
P18084	P18084;H7C580;V9GYZ1;V9GZ57	ITB5_HUMAN	ITGB5	Integrin beta-5	6840790					6317660
Q14331	Q14331;E9PRR7	FRG1_HUMAN	FRG1	Protein FRG1	1636930	1738050	1473340	1897560	1709970	1989550
O75251;O75251-2	O75251;A0A087WTI3;A0A087WXF6;F5GXJ1;F5H5N1;O75251-2	NDUS7-2_HUMAN;NDUS7_HUMAN	NDUFS7	NADH dehydrogenase [ubiquinone] iron-sulfur protein 7, mitochondrial	1509960	1553770	1872080	2005630	1890840	1567400
Q5SSJ5	Q5SSJ5;B0QZK4;Q5SSJ5-2;Q5SSJ5-3;Q5SWC8;X6RGJ2	HP1B3_HUMAN	HP1BP3	Heterochromatin protein 1-binding protein 3	1041440	878583	1020270	1719400	2571000	1934920
Q68CP9;Q68CP9-3	Q68CP9;F8WCU9;Q68CP9-3	ARID2-3_HUMAN;ARID2_HUMAN	ARID2	AT-rich interactive domain-containing protein 2	1756550	1875210	1805360	1847750	1947050	1733390
Q08623;Q08623-3;Q08623-4	Q08623;E7EVH9;Q08623-2;Q08623-3;Q08623-4	HDHD1-3_HUMAN;HDHD1-4_HUMAN;HDHD1_HUMAN	PUDP	Pseudouridine-5'-phosphatase	1989660	1606670	1678560	1765030	2056260	2256830
Q15121;Q15121-2	Q15121;Q15121-2	PEA15-2_HUMAN;PEA15_HUMAN	PEA15	Astrocytic phosphoprotein PEA-15	1669180	1850100	2091290	2300360	1919970	1924010
Q96IJ6	Q96IJ6;A0A087WUI8;C9J255;C9JAH0;F8WD54;Q96IJ6-2	GMPPA_HUMAN	GMPPA	Mannose-1-phosphate guanyltransferase alpha	1930470	1733030	1688120	1376890	1609540	2145380
Q9UBK7;Q9UBK7-2;Q9UBK7-3;Q9UNT1;Q9UNT1-2;Q9UNT1-3	Q9UBK7;Q9UNT1;A8MXF6;B7ZBD5;Q9UBK7-2;Q9UBK7-3;Q9UNT1-2;Q9UNT1-3	RBL2A-2_HUMAN;RBL2A-3_HUMAN;RBL2A_HUMAN;RBL2B-2_HUMAN;RBL2B-3_HUMAN;RBL2B_HUMAN	RABL2A;RABL2B	Rab-like protein 2A	1906100	1459010	2108290	1466750	1266950	1724470
Q9NRY5	Q9NRY5;E5RFK2;E5RGF9;E5RHI8;E5RHP2	F1142_HUMAN	FAM114A2	Protein FAM114A2	1710930	1806230	1618560	1825810	1920410	1935230
O60885	O60885;O60885-2;O60885-3	BRD4_HUMAN	BRD4	Bromodomain-containing protein 4	1844970	1694300	1661180	1536290	1797170	1562960
O95671	O95671;O95671-2	ASML_HUMAN	ASMTL	Probable bifunctional dTTP/UTP pyrophosphatase/methyltransferase protein	1627590	1426750	1932200	2256950	1982750	1886810
Q96ST2;Q96ST2-2;Q96ST2-3	Q96ST2;A0A1B0GW95;H7C0U1;Q96ST2-2;Q96ST2-3	IWS1-2_HUMAN;IWS1-3_HUMAN;IWS1_HUMAN	IWS1	Protein IWS1 homolog	2007020	1890340	1731310	1892300	2025780	1890090
O60762	O60762;H0Y368;Q5QPJ9;Q5QPK2	DPM1_HUMAN	DPM1	Dolichol-phosphate mannosyltransferase subunit 1	1672840	1742440	2030070	1682310	1906830	1701860
Q14012	Q14012;C9JES6	KCC1A_HUMAN	CAMK1	Calcium/calmodulin-dependent protein kinase type 1	1544550	1535860	1521710	1827260	2524000	2050840
P31937	P31937	3HIDH_HUMAN	HIBADH	3-hydroxyisobutyrate dehydrogenase, mitochondrial	1935770	1790630	1625350	1637990	1606440	2183050
Q08AM6	Q08AM6;Q08AM6-2	VAC14_HUMAN	VAC14	Protein VAC14 homolog	1673570	1841270	1867990	1633070	1666820	1747880
P61006	P61006;P61006-2	RAB8A_HUMAN	RAB8A	Ras-related protein Rab-8A	1463270	1479330	1806890	1967170	1818640	1666780
P23786	P23786;A0A1B0GTB8;A0A1B0GTM0;A0A1B0GUD9;A0A1B0GV75;A0A1B0GVF3;A0A1B0GWC0	CPT2_HUMAN	CPT2	Carnitine O-palmitoyltransferase 2, mitochondrial	1541200	1648360	1648920	1698330	1893740	1730840
Q9NP31;Q9NP31-2;Q9NP31-3;Q9NP31-4	Q9NP31;Q9NP31-2;Q9NP31-3;Q9NP31-4	SH22A-2_HUMAN;SH22A-3_HUMAN;SH22A-4_HUMAN;SH22A_HUMAN	SH2D2A	SH2 domain-containing protein 2A	1720520	1391310	1519730	2108260	1276950	1827230
J3KQL8	J3KQL8	J3KQL8_HUMAN	APOL2	Isoform of Q9BQE5, Apolipoprotein L2	1742900	2306110	1709640	1533870	1481370	1849740
P25685	P25685;M0QXK0;M0QYT3;M0QZD0;M0R080;M0R1D6;P25685-2	DNJB1_HUMAN	DNAJB1	DnaJ homolog subfamily B member 1	1701880	1371930	1641160	1611780	1727760	1630290
P61964	P61964	WDR5_HUMAN	WDR5	WD repeat-containing protein 5	1704350	1748570	1588130	1505880	1652570	1631950
P49407-2	P10523;P49407;E7ESX4;E9PM35;P49407-2	ARRB1-2_HUMAN	ARRB1	Isoform of P49407, Isoform 1B of Beta-arrestin-1	1444040	1406630	1765180	1478060	2236310	1866240
O43805	O43805;C9JNU9	SSNA1_HUMAN	SSNA1	Sjoegren syndrome nuclear autoantigen 1	2029360	2178810	1735590	1915850	1473080	1781110
Q9HA64	Q9HA64;I3L139;I3L2G3;I3L3W5	KT3K_HUMAN	FN3KRP	Ketosamine-3-kinase	1813970	1738900	1418760	1962960	1448540	2221110
Q9Y5K6	Q9Y5K6	CD2AP_HUMAN	CD2AP	CD2-associated protein	1631720	1807890	1662220	1454620	1875050	1658160
Q96I25	Q96I25	SPF45_HUMAN	RBM17	Splicing factor 45	2018060	1894880	1600100	1707640	1625120	1809200
P85037	P85037;Q01167;E9PM37;E9PPI7;P85037-2;Q01167-2	FOXK1_HUMAN	FOXK1	Forkhead box protein K1	1628250	1776890	1510450	1735600	1664420	1982860
Q9UHG3	Q9UHG3;C9JGT6;C9JM55;C9K055;F8W8W4;Q9UHG3-2	PCYOX_HUMAN	PCYOX1	Prenylcysteine oxidase 1	1666930	1697410	1785640	1772260	1583780	2110210
Q9BRF8	Q9BRF8;Q9BRF8-2	CPPED_HUMAN	CPPED1	Serine/threonine-protein phosphatase CPPED1	1588170	2136640	2317930	1959760	1292400	1450530
Q8TDQ7-2	Q8TDQ7;Q8TDQ7-2;Q8TDQ7-3;Q8TDQ7-4;Q8TDQ7-5	GNPI2-2_HUMAN	GNPDA2	Isoform of Q8TDQ7, Isoform 2 of Glucosamine-6-phosphate isomerase 2	1836430	1784330	1710740	1474170	1375710	1814540
Q96EQ0	Q96EQ0	SGTB_HUMAN	SGTB	Small glutamine-rich tetratricopeptide repeat-containing protein beta	1790300	1737440	1838830	1508920	1878840	1904940
Q9UK59	Q9UK59;Q9UK59-2	DBR1_HUMAN	DBR1	Lariat debranching enzyme	1723250	1946170	1837100	1822550	1545050	1847960
P16278;P16278-3	P16278;C9JF15;C9JWX1;E7EQ29;F8WF40;P16278-2;P16278-3	BGAL-3_HUMAN;BGAL_HUMAN	GLB1	Beta-galactosidase	1893640	1605260	1854340	1596860	1491470	1597950
Q13418	Q13418;A0A0A0MTH3	ILK_HUMAN	ILK	Integrin-linked protein kinase	1904090	1667060	1781250	1827880	1631710	1787530
Q9C086	Q9C086;J3KQ70	IN80B_HUMAN	INO80B	INO80 complex subunit B	2231120	2150990	2243420	1855880	1836160	1661460
O95178	O95178;C9IZW8;C9JXM4;H7C5B8	NDUB2_HUMAN	NDUFB2	NADH dehydrogenase [ubiquinone] 1 beta subcomplex subunit 2, mitochondrial	1982470	1518870	1047510	1504580	1582570	2345780
P52888	P52888;K7EP46	THOP1_HUMAN	THOP1	Thimet oligopeptidase	1636130	1543620	1692030	1674060	1791220	1504840
Q13868	Q13868;A3KFL1;A3KFL2;A3KFL5;Q13868-2;Q13868-3	EXOS2_HUMAN	EXOSC2	Exosome complex component RRP4	1658220	1517710	1435600	1557700	1593590	1690710
O14744;O14744-2	O14744;G3V5T6;H0YJ77;H0YJX6;O14744-2;O14744-3;O14744-4;O14744-5	ANM5-2_HUMAN;ANM5_HUMAN	PRMT5	Protein arginine N-methyltransferase 5	1725250	1773800	1597660	1673870	1843640	1757540
Q09161	Q09161	NCBP1_HUMAN	NCBP1	Nuclear cap-binding protein subunit 1	1765570	1963470	1817770	1830370	1582880	1711630
Q06265;Q06265-2	Q06265;D6R905;D6RA17;D6RIY6;H0Y9L5;Q06265-2;Q06265-3;Q06265-4	EXOS9-2_HUMAN;EXOS9_HUMAN	EXOSC9	Exosome complex component RRP45	1632040	1701930	1753980	1724790	1690350	1920970
Q8TEM1	Q8TEM1	PO210_HUMAN	NUP210	Nuclear pore membrane glycoprotein 210	1057210	1190810	1360880	1401880	2379350	952118
P47813	O14602;P47813;X6RAC9	IF1AX_HUMAN	EIF1AX	Eukaryotic translation initiation factor 1A, X-chromosomal	1497170	1568910	1631720	1681500	1820290	1766240
Q8TCS8	Q8TCS8	PNPT1_HUMAN	PNPT1	Polyribonucleotide nucleotidyltransferase 1, mitochondrial	1740760	1165130	1747180	1539580	1572910	1647580
Q9UHB9	Q9UHB9;Q9UHB9-2;Q9UHB9-4	SRP68_HUMAN	SRP68	Signal recognition particle subunit SRP68	1683250	1795010	1843230	1899290	1909340	1685430
Q7Z6Z7;Q7Z6Z7-2;Q7Z6Z7-3	Q7Z6Z7;Q7Z6Z7-2;Q7Z6Z7-3	HUWE1-2_HUMAN;HUWE1-3_HUMAN;HUWE1_HUMAN	HUWE1	E3 ubiquitin-protein ligase HUWE1	1692560	1802350	1733800	1905080	1790620	1376080
P29728;P29728-2	P29728;A0A087X0V5;P29728-2	OAS2-2_HUMAN;OAS2_HUMAN	OAS2	2'-5'-oligoadenylate synthase 2	1501200	2184530	1890340	1721480	1545570	1426920
Q9Y6Y0	Q9Y6Y0	NS1BP_HUMAN	IVNS1ABP	Influenza virus NS1A-binding protein	1057930	1385730	2114650	1963770	3097490	1943030
Q08378	Q08378;Q08378-2;Q08378-4	GOGA3_HUMAN	GOLGA3	Golgin subfamily A member 3	1617260	1717990	1765270	1689690	1869520	1797130
Q53H12	Q53H12;A0A0G2JLD0;A0A0G2JLG5;A0A3B3ISY9;A0A3B3ISZ0;A0A3B3ITD0;E9PC15;E9PG39	AGK_HUMAN	AGK	Acylglycerol kinase, mitochondrial	1405790	1467390	1745530	1947340	1750790	1717240
Q96T37;Q96T37-2;Q96T37-3;Q96T37-4	Q96T37;A0A087WWP4;A0A494C001;Q96T37-2;Q96T37-3;Q96T37-4	RBM15-2_HUMAN;RBM15-3_HUMAN;RBM15-4_HUMAN;RBM15_HUMAN	RBM15	RNA-binding protein 15	1571650	1544720	1662980	1753900	1955070	1922040
Q7Z4H3	Q7Z4H3;Q7Z4H3-2	HDDC2_HUMAN	HDDC2	HD domain-containing protein 2	1852610	1961980	1759120	1149530	1913810	1872270
Q9BTW9-4	Q9BTW9;A0A0J9YVR1;A0A0J9YWI5;J3KR97;Q9BTW9-2;Q9BTW9-4	TBCD-4_HUMAN	TBCD	Isoform of Q9BTW9, Isoform 4 of Tubulin-specific chaperone D	1648280	1924920	1867340	1631180	1878720	1492000
Q9Y2Q5	Q9Y2Q5;Q9Y2Q5-2;Q9Y2Q5-3	LTOR2_HUMAN	LAMTOR2	Ragulator complex protein LAMTOR2	1795180	1788820	1657070	1751490	1649220	1842710
Q8WXA9-2	Q8WXA9;Q8WXA9-2	SREK1-2_HUMAN	SREK1	Isoform of Q8WXA9, Isoform 2 of Splicing regulatory glutamine/lysine-rich protein 1	1487560	1778330	1752680	1781490	1886770	1628880
Q7Z7E8	Q7Z7E8;Q7Z7E8-2	UB2Q1_HUMAN	UBE2Q1	Ubiquitin-conjugating enzyme E2 Q1	1960860	1643530	1738160	1921530	1523770	1843210
P78406	P78406;B0QZ36;E9PPG9;E9PQ57	RAE1L_HUMAN	RAE1	mRNA export factor	1716140	1817210	1566070	1684440	1672180	1635800
Q9UIA9	Q9UIA9;E7ESC6	XPO7_HUMAN	XPO7	Exportin-7	1779600	1833500	1668610	1605550	1657270	1539980
Q9ULH1;Q9ULH1-2	Q9ULH1;A0A0A0MRE5;H0YBF7;Q9ULH1-2	ASAP1-2_HUMAN;ASAP1_HUMAN	ASAP1	Arf-GAP with SH3 domain, ANK repeat and PH domain-containing protein 1	2026970	1813500	1547660	1201170	1706540	1696650
Q9NWV8	Q9NWV8;J3KQS6;M0QYV1;M0R0I0;M0R193;M0R2A4;M0R2I2;M0R2K3;M0R3F4;Q9NWV8-3	BABA1_HUMAN	BABAM1	BRISC and BRCA1-A complex member 1	1660340	1788520	1641570	1839600	1983170	1763620
Q7L5D6	Q7L5D6;C9JHN8;C9JPA8;C9JY46;Q7L5D6-2	GET4_HUMAN	GET4	Golgi to ER traffic protein 4 homolog	1764160	1735510	1664290	2055740	1551210	1532690
O96008	K7EKG4;O96008;O96008-2	TOM40_HUMAN	TOMM40	Mitochondrial import receptor subunit TOM40 homolog	1509270	1777760	1541840	1806910	1839600	1650500
P27986;P27986-4	P27986;E5RJY0;H0YBC2;P27986-2;P27986-3;P27986-4;P27986-5	P85A-4_HUMAN;P85A_HUMAN	PIK3R1	Phosphatidylinositol 3-kinase regulatory subunit alpha	1691270	1761930	1685590	1507530	1534480	1732520
Q14289-2	Q14289;Q14289-2	FAK2-2_HUMAN	PTK2B	Isoform of Q14289, Isoform 2 of Protein-tyrosine kinase 2-beta	1718320	1715320	1854100	1781010	1751070	1716130
Q86YV0	Q86YV0;Q86YV0-2	RASL3_HUMAN	RASAL3	RAS protein activator like-3	1216210	1363110	1907050	1891160	1619470	1520410
O76021	O76021;I3L234;I3L3C4;I3L3U9;J3QSV6	RL1D1_HUMAN	RSL1D1	Ribosomal L1 domain-containing protein 1	1343500	1298690	1106240	1538560	1624920	1392620
Q01433	Q01433;H0Y360;Q01433-2;Q01433-3;Q01433-4;Q01433-5	AMPD2_HUMAN	AMPD2	AMP deaminase 2	1798580	1644970	1708860	1645000	1883670	1566810
P62875	P62875	RPAB5_HUMAN	POLR2L	DNA-directed RNA polymerases I, II, and III subunit RPABC5	1670850	1519270	1910920	2217720	1772590	2117960
Q9UJW0;Q9UJW0-3	Q9UJW0;Q9UJW0-2;Q9UJW0-3	DCTN4-3_HUMAN;DCTN4_HUMAN	DCTN4	Dynactin subunit 4	1438090	1528690	1810670	1602920	1946880	1695520
P25208	P25208;F8VSL3	NFYB_HUMAN	NFYB	Nuclear transcription factor Y subunit beta	1686720	1486730	1585500	1672260	1732470	1988070
P40937	P40937;C9JH72;F5H0U6;F5H304;P40937-2	RFC5_HUMAN	RFC5	Replication factor C subunit 5	1748340	1847830	1572780	1851080	1668850	1673760
Q9NZZ3	Q9NZZ3;Q9NZZ3-2	CHMP5_HUMAN	CHMP5	Charged multivesicular body protein 5	1478440	1715870	1717400	1486370	1691910	1614110
A6NDG6	A6NDG6;H3BV17	PGP_HUMAN	PGP	Glycerol-3-phosphate phosphatase	1544640	1546710	1693850	1507010	1778320	1670320
P08243;P08243-2	P08243;P08243-2;P08243-3	ASNS-2_HUMAN;ASNS_HUMAN	ASNS	Asparagine synthetase [glutamine-hydrolyzing]	2090350	1783960	2051090	1627360	1172390	1557450
Q9BVP2;Q9BVP2-2	Q9BVP2;Q9BVP2-2	GNL3-2_HUMAN;GNL3_HUMAN	GNL3	Guanine nucleotide-binding protein-like 3	1574950	1710670	1420690	1936790	1778220	1912290
P53609	P53609;P53609-2	PGTB1_HUMAN	PGGT1B	Geranylgeranyl transferase type-1 subunit beta	1677130	1782150	1637000	1624570	1423060	1719080
Q8TDZ2;Q8TDZ2-4	Q8TDZ2;H0Y6Z4;Q8TDZ2-2;Q8TDZ2-4	MICA1-4_HUMAN;MICA1_HUMAN	MICAL1	[F-actin]-monooxygenase MICAL1	1225690	1947800	1802700	1814850	1657400	1577530
P18859;P18859-2	P18859;A8MUH2;P18859-2	ATP5J-2_HUMAN;ATP5J_HUMAN	ATP5PF	ATP synthase-coupling factor 6, mitochondrial	1533820	1893890	1852230	2107080	2106020	2058080
Q9BSJ2;Q9BSJ2-4	Q9BSJ2;B3KTU7;F2Z2B9;Q9BSJ2-3;Q9BSJ2-4	GCP2-4_HUMAN;GCP2_HUMAN	TUBGCP2	Gamma-tubulin complex component 2	1772640	1782630	1831580	1768450	1633090	1490670
P04844;P04844-2	P04844;P04844-2	RPN2-2_HUMAN;RPN2_HUMAN	RPN2	Dolichyl-diphosphooligosaccharide--protein glycosyltransferase subunit 2	1296110	1589650	1439130	1551490	2311040	1041360
Q5JTJ3;Q5JTJ3-2;Q5JTJ3-3	Q5JTJ3;Q5JTJ3-2;Q5JTJ3-3;X6R5Z6	COA6-2_HUMAN;COA6-3_HUMAN;COA6_HUMAN	COA6	Cytochrome c oxidase assembly factor 6 homolog	1631950	1981390	1623970	1635650	1607030	1674530
O00264	O00264;O00264-2	PGRC1_HUMAN	PGRMC1	Membrane-associated progesterone receptor component 1	1871100	1747780	1440660	1837900	1760370	1739780
Q03518	Q03518;A0A140T9T7	TAP1_HUMAN	TAP1	Antigen peptide transporter 1	965552	1362180	1092850	1459730	2386790	886197
O60256	O60256;C9JDH0;C9JDU5;C9JJS3;C9K0K7;E7EPA1;E7EW35;I3L164;I3L331;O60256-3	KPRB_HUMAN	PRPSAP2	Phosphoribosyl pyrophosphate synthase-associated protein 2	1429180	1536450	1549970	1762210	1784650	1822900
P62837	P62837;A0A0A0MQU3	UB2D2_HUMAN	UBE2D2	Ubiquitin-conjugating enzyme E2 D2	2044080	1680800	1826990	1494330	1508820	1669570
Q14790-2;Q14790-4	Q14790;A0A0A0MS31;E7EQ01;E7EQ06;E7ETB7;E7EVN1;Q14790-2;Q14790-3;Q14790-4;Q14790-5;Q14790-6;Q14790-7;Q14790-8;Q14790-9	CASP8-2_HUMAN;CASP8-4_HUMAN	CASP8	Isoform of Q14790, Isoform 2 of Caspase-8	1534860	1585580	1673440	1804400	1481760	1614020
O00159;O00159-3	O00159;F5H6E2;O00159-2;O00159-3	MYO1C-3_HUMAN;MYO1C_HUMAN	MYO1C	Unconventional myosin-Ic	1827410	1621120	2038360	1865590	1094000	1083690
O00273	O00273;K7ERT1;O00273-2	DFFA_HUMAN	DFFA	DNA fragmentation factor subunit alpha	1577460	1690510	1582810	1795970	2062050	1779900
Q8NDH3;Q8NDH3-2;Q8NDH3-4;Q8NDH3-5	Q8NDH3;Q8NDH3-2;Q8NDH3-4;Q8NDH3-5	PEPL1-2_HUMAN;PEPL1-4_HUMAN;PEPL1-5_HUMAN;PEPL1_HUMAN	NPEPL1	Probable aminopeptidase NPEPL1	1401940	1275820	1785460	1644250	1532850	1686890
P61218	P61218;U3KPY1;U3KQB0	RPAB2_HUMAN	POLR2F	DNA-directed RNA polymerases I, II, and III subunit RPABC2	1796520	1657670	1531400	1837670	1905640	2015450
P13995	P13995;B8ZZU9;B9A062	MTDC_HUMAN	MTHFD2	Bifunctional methylenetetrahydrofolate dehydrogenase/cyclohydrolase, mitochondrial	1783860	1646180	1896920	2020740	1414630	1588090
Q9P253	Q9P253	VPS18_HUMAN	VPS18	Vacuolar protein sorting-associated protein 18 homolog	1532740	1741190	1897250	1646710	1469570	1626920
Q14677	Q14677;Q14677-2;Q14677-3	EPN4_HUMAN	CLINT1	Clathrin interactor 1	1556360	1843450	1800610	1706290	1748760	1575080
Q13442	Q13442	HAP28_HUMAN	PDAP1	28 kDa heat- and acid-stable phosphoprotein	1512200	1455220	1526860	1411340	1681900	1445060
Q8IXH7;Q8IXH7-4	Q8IXH7;H0UI80;Q8IXH7-4;X6RLT1	NELFD-4_HUMAN;NELFD_HUMAN	NELFCD	Negative elongation factor C/D	1819070	1856350	1735170	1708640	1601260	1727900
P52306;P52306-5	P52306;P52306-2;P52306-3;P52306-4;P52306-5;P52306-6	GDS1-5_HUMAN;GDS1_HUMAN	RAP1GDS1	Rap1 GTPase-GDP dissociation stimulator 1	1575850	1828780	1638770	1578830	2066840	1566080
O75955	O75955;A0A140T974;A0A140T9R1;A0A140T9W4;O75955-2	FLOT1_HUMAN	FLOT1	Flotillin-1	1638460	1770110	1539240	1569020	1837880	1457150
Q8WZA9	Q8WZA9	IRGQ_HUMAN	IRGQ	Immunity-related GTPase family Q protein	1843240	1506940	1493260	1847100	1766030	1593680
P08648	P08648	ITA5_HUMAN	ITGA5	Integrin alpha-5	1843980	1337370	1550220	1753140	1663830	1746190
Q9NY27	Q9NY27;C9IZ04;H7C559;Q9NY27-2;Q9NY27-3	PP4R2_HUMAN	PPP4R2	Serine/threonine-protein phosphatase 4 regulatory subunit 2	1636490	1806900	1673670	2009240	1603210	1977380
Q53FT3	Q53FT3;A0A087WYW7;E9PPG8	HIKES_HUMAN	HIKESHI	Protein Hikeshi	1507610	1945810	1668780	1632530	1646510	1870910
P52948;P52948-5	P52948;A0A3B3ITD8;P52948-2;P52948-3;P52948-4;P52948-5;P52948-6	NUP98-5_HUMAN;NUP98_HUMAN	NUP98	Nuclear pore complex protein Nup98-Nup96	1593080	1665380	1793150	1744610	1766650	1577140
O95486	O95486;O95486-2	SC24A_HUMAN	SEC24A	Protein transport protein Sec24A	1678850	1523990	1611940	1676290	1621060	1518180
Q5HYI8	Q5HYI8	RABL3_HUMAN	RABL3	Rab-like protein 3	1721340	1770390	1344870	1640340	1562020	1813470
Q9Y5X1	Q9Y5X1	SNX9_HUMAN	SNX9	Sorting nexin-9	1723080	1527370	1630650	2037170	1497390	1832150
Q8WUZ0	Q4VC05;Q8WUZ0;Q9BQE9;F2Z3H6;F8WDZ4;F8WE18;I3L1Q2;I3L4D5;Q4VC05-2;Q8WUZ0-2;Q9BQE9-3;Q9BQE9-4	BCL7C_HUMAN	BCL7C	B-cell CLL/lymphoma 7 protein family member C	1406150	1960530	1737730	1594230	1825410	1590520
Q13191	Q13191;A0A2R8Y5E1;A0A2R8Y7I2;A0A2R8Y875;A0A2R8Y8D8;A0A2R8YDW4;A0A2R8YFD4;B5MC15;C9JRB3;C9JU85;C9K048;H0Y3L9;Q13191-2;Q13191-3	CBLB_HUMAN	CBLB	E3 ubiquitin-protein ligase CBL-B	1524220	1668350	1743290	1418900	1750910	1465700
Q8N806	Q8N806;E9PCJ7;H0YJA0;H0YJM2;G3V3Q6	UBR7_HUMAN	UBR7	Putative E3 ubiquitin-protein ligase UBR7	1734270	1856360	1338950	1878200	1909520	1784440
Q86VS8	Q86VS8	HOOK3_HUMAN	HOOK3	Protein Hook homolog 3	1623240	1555910	1626570	1592940	1703760	1631060
P55039	P55039	DRG2_HUMAN	DRG2	Developmentally-regulated GTP-binding protein 2	1414160	1668450	1741940	1809230	1781800	1576780
Q6DD88	Q6DD88;F5H6I7	ATLA3_HUMAN	ATL3	Atlastin-3	1148290	1583800	1515610	1924420	1849650	1620520
Q9HBL7	Q9HBL7	PLRKT_HUMAN	PLGRKT	Plasminogen receptor (KT)	1491900	1524170	1745750	1886150	1579370	1634390
O00471	O00471;A0A0A0MSI8;F8W9B8	EXOC5_HUMAN	EXOC5	Exocyst complex component 5	1482410	1745150	1797770	1663710	1611840	1497320
Q92844	Q92844;E7EQA9;H7BZ28;H7C3L4	TANK_HUMAN	TANK	TRAF family member-associated NF-kappa-B activator	1588760	1569380	1794980	1791020	1527050	1489710
Q9UBN4;Q9UBN4-2;Q9UBN4-3;Q9UBN4-4;Q9UBN4-5;Q9UBN4-6;Q9UL62	Q9UBN4;Q9UL62;Q9UBN4-2;Q9UBN4-3;Q9UBN4-4;Q9UBN4-5;Q9UBN4-6	TRPC4-2_HUMAN;TRPC4-3_HUMAN;TRPC4-4_HUMAN;TRPC4-5_HUMAN;TRPC4-6_HUMAN;TRPC4_HUMAN;TRPC5_HUMAN	TRPC4;TRPC5	Short transient receptor potential channel 4	2073570	2209720	1641400	1395290	1851060	1549500
P42785	P42785;E9PIG4;E9PKN6;E9PL49;E9PL85;E9PLY4;E9PNF7;E9PNJ1;E9PQB5;E9PQN3;P42785-2	PCP_HUMAN	PRCP	Lysosomal Pro-X carboxypeptidase	1612220	1315460	1830390	1404600	1604170	1883660
Q5VWZ2	Q5VWZ2;Q5VWZ2-2	LYPL1_HUMAN	LYPLAL1	Lysophospholipase-like protein 1	1469250	1502610	1499830	1410200	1488950	1691010
Q9Y5P4;Q9Y5P4-2;Q9Y5P4-3	Q9Y5P4;A0A2R8Y5H3;A0A2R8Y5S9;A0A2R8Y7C5;A0A2R8Y7Q9;A0A2R8YCI0;A0A2R8YE18;A0A2R8YEA4;A0A2R8YEK8;A0A2R8YFI2;Q9Y5P4-2;Q9Y5P4-3	C43BP-2_HUMAN;C43BP-3_HUMAN;C43BP_HUMAN	COL4A3BP	Collagen type IV alpha-3-binding protein	1599470	1635940	1507730	1593030	1713490	1715910
Q13158	Q13158	FADD_HUMAN	FADD	FAS-associated death domain protein	1656950	1610190	1682570	1909900	1695290	1751860
O15514	O15514;E9PB93;E9PHV4	RPB4_HUMAN	POLR2D	DNA-directed RNA polymerase II subunit RPB4	1605070	1868000	1946720	1883060	1618590	1944440
O15027;O15027-2;O15027-3;O15027-4;O15027-5	O15027;A0A0C4DH09;A0A3F2YNX0;A0A3F2YNZ0;F1T0I1;O15027-2;O15027-3;O15027-4;O15027-5;Q8N9G1;X6RGP5	SC16A-2_HUMAN;SC16A-3_HUMAN;SC16A-4_HUMAN;SC16A-5_HUMAN;SC16A_HUMAN	SEC16A	Protein transport protein Sec16A	1680500	1659140	1680220	1642350	1725710	1727620
Q30134	P20039;Q30134	2B18_HUMAN	HLA-DRB1	Isoform of P01911, HLA class II histocompatibility antigen, DRB1-8 beta chain	680971	394278	935954	4728130	1173590	1405360
O43615	O43615;M0QXU7	TIM44_HUMAN	TIMM44	Mitochondrial import inner membrane translocase subunit TIM44	1465550	1487420	1955440	1521990	1578570	1448700
Q96F86	Q96F86;H3BPN4;H3BSQ0	EDC3_HUMAN	EDC3	Enhancer of mRNA-decapping protein 3	1602900	1723820	1578040	1773080	1577600	1664900
P42566	P42566;B1AUU8;P42566-2	EPS15_HUMAN	EPS15	Epidermal growth factor receptor substrate 15	1658530	1728830	1773220	1707880	1808780	1737790
Q9BZL6;Q9BZL6-3	O94806;Q15139;Q9BZL6;F8WBA3;M0R2Z8;Q9BZL6-2;Q9BZL6-3	KPCD2-3_HUMAN;KPCD2_HUMAN	PRKD2	Serine/threonine-protein kinase D2	1741240	1697940	1761960	1544040	1591320	1369810
Q9Y4B6;Q9Y4B6-2	Q9Y4B6;Q9Y4B6-2;Q9Y4B6-3	DCAF1-2_HUMAN;DCAF1_HUMAN	DCAF1	DDB1- and CUL4-associated factor 1	1932100	1849350	1586650	2028820	1809380	1929730
P36873;P36873-2	P36873;A0A087WYY5;F8VR82;F8VYE8;F8W0W8;P36873-2	PP1G-2_HUMAN;PP1G_HUMAN	PPP1CC	Serine/threonine-protein phosphatase PP1-gamma catalytic subunit	1654360	1578740	1466330	1616820	1218770	1647920
O00629	O00505;O00629;H7C4F6	IMA3_HUMAN	KPNA4	Importin subunit alpha-3	1669000	1725630	1652200	1769480	1470580	1741690
Q8WWW0;Q8WWW0-2	Q8WWW0;A0A075B763;A0A1B0GTG4;Q8TEK8;Q8WWW0-2;Q8WWW0-3	RASF5-2_HUMAN;RASF5_HUMAN	RASSF5	Ras association domain-containing protein 5	1723730	1509090	1539800	1559730	1569860	1549870
Q9NPA2	Q9NPA2	MMP25_HUMAN	MMP25	Matrix metalloproteinase-25	1799980	1268270	2032660	1330590	1935550	2624950
Q9Y228;Q9Y228-2	Q9Y228;B1AJU2;H0YF09;Q9Y228-2	T3JAM-2_HUMAN;T3JAM_HUMAN	TRAF3IP3	TRAF3-interacting JNK-activating modulator	1320070	1775560	1492180	1683120	1709910	1519220
Q9P2T1	Q9P2T1;A0A087WWM4;F8WAN9;H0YK13;H0YK71;H0YLB8;H0YLV5;H0YMB3;H0YNJ6;Q9P2T1-2;Q9P2T1-3	GMPR2_HUMAN	GMPR2	GMP reductase 2	1648870	1535750	1563290	1368060	1266680	1348530
Q9UEE9	Q9UEE9;Q9UEE9-2	CFDP1_HUMAN	CFDP1	Craniofacial development protein 1	1632370	1640940	1603160	1477080	1914380	1735440
O43772	O43772;C9JPE1	MCAT_HUMAN	SLC25A20	Mitochondrial carnitine/acylcarnitine carrier protein	1007510	1151170	1692450	1590080	1839610	1499850
P53041	P53041;A8MU39;H0YDU8	PPP5_HUMAN	PPP5C	Serine/threonine-protein phosphatase 5	1608750	1591130	1526030	1531400	1684660	1472440
Q6JBY9	Q6JBY9;B7ZKW8;Q6JBY9-2	CPZIP_HUMAN	RCSD1	CapZ-interacting protein	1386110	1724130	1797750	1831720	2229330	1559830
Q9H0A8	Q9H0A8;A0A0B4J287;H3BM91	COMD4_HUMAN	COMMD4	COMM domain-containing protein 4	1613080	1634530	1610260	1584590	1309950	1592270
O60313-2	O60313;A0A2R8Y3X5;A0A2R8Y4G4;A0A2R8Y4Q3;A0A2R8YD53;A0A2R8YDM2;A0A2R8YE54;A0A2R8YE78;A0A2R8YGE5;C9JMB8;E5KLJ9;O60313-10;O60313-11;O60313-13;O60313-2;O60313-9	OPA1-2_HUMAN	OPA1	Isoform of O60313, Isoform 2 of Dynamin-like 120 kDa protein, mitochondrial	1589700	1559420	1582320	1518900	1479260	1637640
O60613	O60613;A0A087X1G7	SEP15_HUMAN	SELENOF	Selenoprotein F	1503350	1588860	1599630	1761630	1909360	1980350
Q9GZT8;Q9GZT8-2	Q9GZT8;B8ZZI0;C9JN42;E7EXA3;Q6X734;Q9GZT8-2;Q9GZT8-3	NIF3L-2_HUMAN;NIF3L_HUMAN	NIF3L1	NIF3-like protein 1	1629410	1576170	1548930	1363060	1543430	1705260
Q5H9R7;Q5H9R7-2;Q5H9R7-5;Q5H9R7-6	Q5H9R7;E9PKF6;E9PNN8;H7BXH2;Q5H9R7-2;Q5H9R7-3;Q5H9R7-4;Q5H9R7-5;Q5H9R7-6	PP6R3-2_HUMAN;PP6R3-5_HUMAN;PP6R3-6_HUMAN;PP6R3_HUMAN	PPP6R3	Serine/threonine-protein phosphatase 6 regulatory subunit 3	1648090	1657840	1592570	1880720	1787330	1695970
P49247	P49247	RPIA_HUMAN	RPIA	Ribose-5-phosphate isomerase	1412530	1841900	1293890	1417550	1636330	1642340
Q96BN8	Q96BN8	OTUL_HUMAN	OTULIN	Ubiquitin thioesterase otulin	1540870	1538190	1622280	1699280	1594220	1521960
O75369;O75369-2;O75369-8;O75369-9	O75369;E7EN95;O75369-2;O75369-3;O75369-4;O75369-5;O75369-6;O75369-7;O75369-8;O75369-9	FLNB-2_HUMAN;FLNB-8_HUMAN;FLNB-9_HUMAN;FLNB_HUMAN	FLNB	Filamin-B	1578900	1432060	1871060	1468630	1266350	1433430
O95169;O95169-3	O95169;O95169-3	NDUB8-3_HUMAN;NDUB8_HUMAN	NDUFB8	NADH dehydrogenase [ubiquinone] 1 beta subcomplex subunit 8, mitochondrial	1316640	1642800	1656060	1611970	1718940	1899090
Q99490-2	Q99490;F8VVT9;J3KNM6;Q99490-2	AGAP2-2_HUMAN	AGAP2	Isoform of Q99490, Isoform 2 of Arf-GAP with GTPase, ANK repeat and PH domain-containing protein 2	1407950	1425940	1711340	1551610	1553140	1427070
P30047	P30047;H0YNX7;P30047-2	GFRP_HUMAN	GCHFR	GTP cyclohydrolase 1 feedback regulatory protein	1281300	1437500	1482860	1474570	1993040	1663760
P67812;P67812-3;P67812-4	P67812;H0YNA5;H0YNG3;H0YNX5;P67812-2;P67812-3;P67812-4	SC11A-3_HUMAN;SC11A-4_HUMAN;SC11A_HUMAN	SEC11A	Signal peptidase complex catalytic subunit SEC11A	1664180	1488850	1557780	1478070	2155340	1304100
Q06124	Q06124;A0A1W2PPU4;Q06124-2;Q06124-3	PTN11_HUMAN	PTPN11	Tyrosine-protein phosphatase non-receptor type 11	1561900	1593530	1473120	1457440	1603910	1575300
Q9Y2S6	A0A024R1R8;Q9Y2S6	TMA7_HUMAN	TMA7	Translation machinery-associated protein 7	1046350	1167690	1300360	1288210	1872010	1484740
P82930	P82930;C9JJ19	RT34_HUMAN	MRPS34	28S ribosomal protein S34, mitochondrial	1453580	1567600	1645760	1630920	1695050	1722010
Q8WUW1;Q8WUW1-2	Q8WUW1;Q8WUW1-2	BRK1-2_HUMAN;BRK1_HUMAN	BRK1	Protein BRICK1	1637000	1609490	1713230	1676950	1728260	1774980
Q9H9A6	Q9H9A6	LRC40_HUMAN	LRRC40	Leucine-rich repeat-containing protein 40	1532740	1424290	1614070	1547250	1705530	1535030
Q13217	Q13217;X6R9L0	DNJC3_HUMAN	DNAJC3	DnaJ homolog subfamily C member 3	1617100	1295120	1819680	1623480	1286440	1431360
P98175-5	P98175;P98175-2;P98175-3;P98175-4;P98175-5	RBM10-5_HUMAN	RBM10	Isoform of P98175, Isoform 5 of RNA-binding protein 10	1629380	1703560	1447460	1580390	1644920	1599980
Q9H583	Q9H583;Q5T3Q7	HEAT1_HUMAN	HEATR1	HEAT repeat-containing protein 1	1525060	1760840	1555930	1876840	1570530	1688030
Q9NUL5;Q9NUL5-3;Q9NUL5-4	Q9NUL5;K7EMS9;Q9NUL5-3;Q9NUL5-4	RYDEN-3_HUMAN;RYDEN-4_HUMAN;RYDEN_HUMAN	RYDEN	Repressor of yield of DENV protein	1491630	1526430	1663180	1488660	1507190	1718450
Q9H2W6	Q9H2W6	RM46_HUMAN	MRPL46	39S ribosomal protein L46, mitochondrial	1519570	1650350	1541560	1700390	1614010	1615480
O75438	O75438	NDUB1_HUMAN	NDUFB1	NADH dehydrogenase [ubiquinone] 1 beta subcomplex subunit 1	1309560	1467250	1666250	1673970	1605650	1870540
Q15005	Q15005;A0A087WUC6;E9PI68;H0YE04	SPCS2_HUMAN	SPCS2	Signal peptidase complex subunit 2	1072860	1298780	1385420	1451220	1632310	998783
O95298	O95298;E9PRJ5;O95298-2	NDUC2_HUMAN	NDUFC2	NADH dehydrogenase [ubiquinone] 1 subunit C2	2327980	1677060	1427260	1344350	1539620	1467930
P49755	P49755	TMEDA_HUMAN	TMED10	Transmembrane emp24 domain-containing protein 10	1437310	1523150	1538020	1706340	1732140	1317450
Q5JSH3;Q5JSH3-2	Q5JSH3;H7BY83;Q5JSH3-2;Q5JSH3-3;Q5JSH3-4	WDR44-2_HUMAN;WDR44_HUMAN	WDR44	WD repeat-containing protein 44	1650890	1608990	1627210	1555030	1611390	1499520
P63151;P63151-2	P63151;P63151-2	2ABA-2_HUMAN;2ABA_HUMAN	PPP2R2A	Serine/threonine-protein phosphatase 2A 55 kDa regulatory subunit B alpha isoform	1532320	1567460	1496730	1576820	1429590	1382550
O60232	O60232;E9PN57;G3V1B8;H0YEB6;H0YEK1	ZNRD2_HUMAN	ZNRD2	Protein ZNRD2	1420540	1542190	1496980	2094420	1358520	1495650
Q6L8Q7	Q6L8Q7;F6T1Q0;Q6L8Q7-2	PDE12_HUMAN	PDE12	2',5'-phosphodiesterase 12	1326870	1485120	1521900	1553090	1522890	1714990
Q14320	Q14320	FA50A_HUMAN	FAM50A	Protein FAM50A	1546640	1601080	1591570	1367500	1350880	1415560
P54105	P54105;E9PJF4;E9PMI6;E9PQ83;J3KN38	ICLN_HUMAN	CLNS1A	Methylosome subunit pICln	1598490	1621520	1326380	1953950	1644470	1687870
Q96BX8	Q96BX8	MOB3A_HUMAN	MOB3A	MOB kinase activator 3A	1305220	1415230	1790780	1619930	1543650	1415540
P21399	P21399	ACOC_HUMAN	ACO1	Cytoplasmic aconitate hydratase	1584330	1468230	1291610	1310510	1590670	1567230
Q9UBS4	Q9UBS4	DJB11_HUMAN	DNAJB11	DnaJ homolog subfamily B member 11	1698880	1413610	1496010	1710060	1463750	1448740
Q9Y570;Q9Y570-4	Q9Y570;Q9Y570-2;Q9Y570-3;Q9Y570-4	PPME1-4_HUMAN;PPME1_HUMAN	PPME1	Protein phosphatase methylesterase 1	1481380	1603750	1587070	1577010	1620510	1678860
Q14558-2	Q14558;Q14558-2	KPRA-2_HUMAN	PRPSAP1	Isoform of Q14558, Isoform 2 of Phosphoribosyl pyrophosphate synthase-associated protein 1	1365880	1648870	1561410	1539750	1696680	1569840
A0FGR8-2	A0FGR8;A0A087WXU3;A0FGR8-2;A0FGR8-4;A0FGR8-6;H7BXI1	ESYT2-2_HUMAN	ESYT2	Isoform of A0FGR8, Isoform 2 of Extended synaptotagmin-2	806714	1138950	1361650	1624110	2058190	1233820
P45985;P45985-2	P45985;P45985-2	MP2K4-2_HUMAN;MP2K4_HUMAN	MAP2K4	Dual specificity mitogen-activated protein kinase kinase 4	1252110	1604430	1501270	1443660	1777770	1459120
Q9Y3Q8	Q9Y3Q8	T22D4_HUMAN	TSC22D4	TSC22 domain family protein 4	1678140	1717920	1479620	1517870	1740640	1716260
P52789	P52789;E9PB90	HXK2_HUMAN	HK2	Hexokinase-2	1516100	1241460	1216990	1910260	2014510	1550080
P68400	P68400;Q8NEV1;A0A2R8Y3W6;A0A2R8Y4D6;A0A2R8Y4H0;A0A2R8Y5A0;A0A2R8Y797;A0A2R8Y7T1;A0A2R8YCK2;A0A2R8YD58;A0A2R8YDP2;A0A2R8YDY7;A0A2R8YEL7;A0A2R8YEW1;A0A2R8YF43;A0A2R8YF47;A0A2R8YFU2;E7EU96;V9GY80;V9GYA2	CSK21_HUMAN	CSNK2A1	Casein kinase II subunit alpha	1388860	1580320	1580410	1581310	1435890	1524190
P37198	P37198	NUP62_HUMAN	NUP62	Nuclear pore glycoprotein p62	1468630	1617360	1532940	1730790	1791620	1662510
P36639;P36639-2;P36639-3;P36639-4	P36639;P36639-2;P36639-3;P36639-4	8ODP-2_HUMAN;8ODP-3_HUMAN;8ODP-4_HUMAN;8ODP_HUMAN	NUDT1	7,8-dihydro-8-oxoguanine triphosphatase	1487360	1481810	1365790	1460230	1884330	1660000
Q9NXG2	Q9NXG2	THUM1_HUMAN	THUMPD1	THUMP domain-containing protein 1	1302730	1331720	1744050	1584540	1494480	1654620
P22059	P22059	OSBP1_HUMAN	OSBP	Oxysterol-binding protein 1	1550530	1568960	1627560	1529980	1474310	1493940
Q02880;Q02880-2	Q02880;E9PCY5;Q02880-2	TOP2B-2_HUMAN;TOP2B_HUMAN	TOP2B	DNA topoisomerase 2-beta	1200520	1323460	1704900	1615290	2153760	1584630
P0CG12	P0CG12	DERPC_HUMAN	DERPC	Decreased expression in renal and prostate cancer protein	1450210	1467820	1554010	1822640	2064140	1992650
Q5GLZ8;Q5GLZ8-2;Q5GLZ8-6	Q5GLZ8;D6RCL5;H0Y6K7;Q5GLZ8-2;Q5GLZ8-3;Q5GLZ8-6	HERC4-2_HUMAN;HERC4-6_HUMAN;HERC4_HUMAN	HERC4	Probable E3 ubiquitin-protein ligase HERC4	1562140	1701400	1653560	1603030	1563950	1505860
Q13618;Q13618-2	Q13618;H7C1L6;Q13618-2	CUL3-2_HUMAN;CUL3_HUMAN	CUL3	Cullin-3	1275850	1669180	1525200	1600780	1801510	1383940
Q9BUP3-3	Q9BUP3;E9PI87;Q9BUP3-3	HTAI2-3_HUMAN	HTATIP2	Isoform of Q9BUP3, Isoform 3 of Oxidoreductase HTATIP2	1541880	1567520	1435800	1818630	1249950	1705690
Q92614;Q92614-4	Q92614;A0A0D9SFK2;H0YEV9;Q92614-2;Q92614-3;Q92614-4	MY18A-4_HUMAN;MY18A_HUMAN	MYO18A	Unconventional myosin-XVIIIa	1505580	1703290	1992900	1455400	1508370	1240570
Q9P0P0	Q9P0P0;C9J1C6	RN181_HUMAN	RNF181	E3 ubiquitin-protein ligase RNF181	1653460	1545430	1739250	2156720	1986840	1607090
P36915	P36915;A0A140T8Y2;P36915-2	GNL1_HUMAN	GNL1	Guanine nucleotide-binding protein-like 1	1704530	1560510	1445400	1488550	1553290	1591960
Q9Y547	Q9Y547;A6NIR2;X6R7Y7	IFT25_HUMAN	HSPB11	Intraflagellar transport protein 25 homolog	1329820	1742040	1607550	1853650	1774100	1733650
Q13257	Q13257	MD2L1_HUMAN	MAD2L1	Mitotic spindle assembly checkpoint protein MAD2A	1548300	1622840	1479710	1785260	1621670	1559640
Q86VN1;Q86VN1-2	Q86VN1;A0A3B3ISW7;Q86VN1-2	VPS36-2_HUMAN;VPS36_HUMAN	VPS36	Vacuolar protein-sorting-associated protein 36	1558470	1437490	1486030	1483090	1536340	1530620
Q86W42	Q86W42;Q86W42-2	THOC6_HUMAN	THOC6	THO complex subunit 6 homolog	1530530	1591060	1329240	1601370	1522940	1737230
Q96L92;Q96L92-3	Q96L92;A0A2R8Y8A7;Q96L92-2;Q96L92-3	SNX27-3_HUMAN;SNX27_HUMAN	SNX27	Sorting nexin-27	1558770	1521650	1546360	1541660	1447050	1574360
Q15796;Q15796-2	P84022;Q15796;B7Z5N5;H3BQ00;P84022-2;P84022-3;P84022-4;Q15796-2	SMAD2-2_HUMAN;SMAD2_HUMAN	SMAD2	Mothers against decapentaplegic homolog 2	1662750	1528090	1515370	1662410	1482230	1675560
P24941	P24941;E7ESI2;G3V5T9;P24941-2	CDK2_HUMAN	CDK2	Cyclin-dependent kinase 2	1376260	1603700	1357250	1724580	1576690	1472810
Q96EL3	Q96EL3;B9A051	RM53_HUMAN	MRPL53	39S ribosomal protein L53, mitochondrial	1598410	1543750	1565340	1561890	1358160	1461520
P29965	P29965	CD40L_HUMAN	CD40LG	CD40 ligand	1712830	1541240	1626140	1813280	2023480	1786010
A6NC98	A6NC98;A6NC98-2;A6NC98-4	CC88B_HUMAN	CCDC88B	Coiled-coil domain-containing protein 88B	1528190	1357800	1781950	1735780	1468570	1759010
Q9GZR7	Q9GZR7;G3V529	DDX24_HUMAN	DDX24	ATP-dependent RNA helicase DDX24	1071410	1040040	1104940	1883810	2762360	1629780
O14787-2	O14787;A0A075B780;O14787-2	TNPO2-2_HUMAN	TNPO2	Isoform of O14787, Isoform 2 of Transportin-2	1478250	1586560	1608130	1626170	1758480	1524440
Q14653	Q14653;M0QYT9;M0R3C2;Q14653-2;Q14653-3	IRF3_HUMAN	IRF3	Interferon regulatory factor 3	1528330	1648220	1632460	1508730	1486240	1732740
Q9NQT4	Q9NQT4	EXOS5_HUMAN	EXOSC5	Exosome complex component RRP46	1545680	1478850	1424690	1464700	1428560	1555980
[truncated: 3,553 more rows]

## Sheet: Cytoskeleton and migration
Protein Group	Protein Ids	Protein Names	Genes	First Protein Description	Donor 1	Donor 2	Donor 3	Donor 4	Donor 5	Donor 6
Q8IZP0;Q8IZP0-10;Q8IZP0-2;Q8IZP0-3;Q8IZP0-4;Q8IZP0-5;Q8IZP0-6;Q8IZP0-7;Q8IZP0-8;Q8IZP0-9	Q8IZP0;Q9NYB9;A0A0A0MRT6;A0A0C4DG21;B6VEX4;B7Z836;E7EP65;E7EW77;E9PEZ7;F8WAL6;H0Y6B5;Q8IZP0-10;Q8IZP0-11;Q8IZP0-12;Q8IZP0-2;Q8IZP0-3;Q8IZP0-4;Q8IZP0-5;Q8IZP0-6;Q8IZP0-7;Q8IZP0-8;Q8IZP0-9;Q9NYB9-2;Q9NYB9-3;Q9NYB9-4	ABI1-10_HUMAN;ABI1-2_HUMAN;ABI1-3_HUMAN;ABI1-4_HUMAN;ABI1-5_HUMAN;ABI1-6_HUMAN;ABI1-7_HUMAN;ABI1-8_HUMAN;ABI1-9_HUMAN;ABI1_HUMAN	ABI1	Abl interactor 1	2644720	2872740	2761000	2594440	2910050	2728620
Q9P2A4	Q9P2A4;I3L1X2;Q9P2A4-2	ABI3_HUMAN	ABI3	ABI gene family member 3	3660880	3213830	3626900	3387670	3794800	3592630
O14639;O14639-2;O14639-3;O14639-4;O14639-5;O14639-6	O14639;A0A0A0MRL6;A0A3B3IS55;A0A494C1G0;A0A494C1P1;F6XFR5;F8W8M4;H0Y7N6;J3QSX6;O14639-2;O14639-3;O14639-4;O14639-5;O14639-6	ABLM1-2_HUMAN;ABLM1-3_HUMAN;ABLM1-4_HUMAN;ABLM1-5_HUMAN;ABLM1-6_HUMAN;ABLM1_HUMAN	ABLIM1	Actin-binding LIM protein 1	532074	776799	432882	475435	488295	588059
Q9P1F3	Q9P1F3;Q5SZC9	ABRAL_HUMAN	ABRACL	Costars family protein ABRACL	3427720	3125420	3785620	3336880	3546220	3427230
Q15057	Q15057;A0A087X1H5;A0A0U1RQT1;H7C3Q8	ACAP2_HUMAN	ACAP2	Arf-GAP with coiled-coil, ANK repeat and PH domain-containing protein 2	1358240	1471170	1490160	1267290	1384740	1306910
P62736	P62736;P63267;P68032;P68133;A6NL76;B8ZZJ2;C9JFL5;F6QUT6;F6UVQ4;F8WB63	ACTA_HUMAN	ACTA2	Actin, aortic smooth muscle	137864000	184559000	154321000	196544000	156055000	172531000
A0A2R8YFE2	A0A2R8YFE2	A0A2R8YFE2_HUMAN	ACTB	Isoform of P60709, Actin, cytoplasmic 1 (Fragment)			1184770	220979
A0A2R8YEA7	A0A2R8YEA7	A0A2R8YEA7_HUMAN	ACTB	Isoform of P60709, Actin, cytoplasmic 1 (Fragment)	58004.7	93446.3	134067	144037	135569
Q562R1	Q562R1	ACTBL_HUMAN	ACTBL2	Beta-actin-like protein 2	2634800	3173730		3058290	2976130	2658740
P63261	P60709;P63261;A0A2R8Y793;A0A2R8YGF8;C9JUM1;C9JZR7;E7EVS6;G5E9R0;I3L1U9;I3L3I0;I3L3R2;I3L4N8;J3KT65;K7EM38	ACTG_HUMAN	ACTG1	Actin, cytoplasmic 2	944950000	872475000	888919000	857904000	803668000	886175000
K7EM38	K7EM38	K7EM38_HUMAN	ACTG1	Isoform of P63261, Actin, cytoplasmic 2 (Fragment)	2547600	1841780	125489000	1322050	1098510	3655420
O96019	O96019;H7C5S0	ACL6A_HUMAN	ACTL6A	Actin-like protein 6A	3073370	2782450	2512690	2571420	2619680	2659920
P12814;P12814-2;P12814-3	P12814;H9KV75;P12814-2;P12814-3;P12814-4	ACTN1-2_HUMAN;ACTN1-3_HUMAN;ACTN1_HUMAN	ACTN1	Alpha-actinin-1	2347080	2997040	1895960	1834430	2729150	2706400
O43707	O43707;F5GXS2;H7C144;O43707-2;O43707-3	ACTN4_HUMAN	ACTN4	Alpha-actinin-4	22059400	20099500	23485500	20017100	17578300	19918400
Q9NZ32	Q9NZ32;F6S9Y6;G3V2Q5;G3V5Y4;V9GYX7	ARP10_HUMAN	ACTR10	Actin-related protein 10	893806	999411	1067630	1075750	1067430	968899
P61163	P61163;A0A1B0GVS3;R4GMT0	ACTZ_HUMAN	ACTR1A	Alpha-centractin	3177990	3467100	3225270	2861480	3162290	3220550
P42025	P42025	ACTY_HUMAN	ACTR1B	Beta-centractin	3410790	3145370	3479400	3377800	3262950	3694840
P61160	P61160;A0A1B0GWD0;A0A1B0GWH0;P61160-2	ARP2_HUMAN	ACTR2	Actin-related protein 2	13245400	13312800	14758400	12528800	11892200	12227200
P61158	P61158;B4DXW1	ARP3_HUMAN	ACTR3	Actin-related protein 3	21033300	20087500	21552500	19379600	18884700	20724200
Q9H9F9	Q9H9F9	ARP5_HUMAN	ACTR5	Actin-related protein 5	304155	239160	221288	254773	214081	263618
Q9GZN1	Q9GZN1;F8VP72;F8VRL1;F8W043;F8W057;F8W0Q1;Q9GZN1-2	ARP6_HUMAN	ACTR6	Actin-related protein 6	365792	466298	448476	439253	383965	463801
Q9H981	Q9H981;H0Y849;Q9H981-2;Q9H981-3	ARP8_HUMAN	ACTR8	Actin-related protein 8		179442	186496	169396	173064	151476
P35611;P35611-3	P35611;E7ENY0;E7EV99;H0Y9H2;P35611-2;P35611-3;P35611-4;P35611-5;P35611-6	ADDA-3_HUMAN;ADDA_HUMAN	ADD1	Alpha-adducin	2900590	3307850	2645580	2600420	2645640	2754070
Q9UEY8;Q9UEY8-2	Q9UEY8;Q9UEY8-2	ADDG-2_HUMAN;ADDG_HUMAN	ADD3	Gamma-adducin	2244700	2328600	2252190	1825010	1960380	2126000
Q8N4X5;Q8N4X5-2;Q8N4X5-4	Q8N4X5;Q8N4X5-2;Q8N4X5-4	AF1L2-2_HUMAN;AF1L2-4_HUMAN;AF1L2_HUMAN	AFAP1L2	Actin filament-associated protein 1-like 2				157065	394911	232121
P55196;P55196-5	P55196;A8MQ02;H0Y7R8;J3KN01;P55196-1;P55196-2;P55196-3;P55196-5;P55196-6;Q5TIG5	AFAD-5_HUMAN;AFAD_HUMAN	AFDN	Afadin	929703	570358	772209	767556	571076	711286
Q12802;Q12802-2;Q12802-4	Q12802;H0YMW2;Q12802-2;Q12802-4	AKP13-2_HUMAN;AKP13-4_HUMAN;AKP13_HUMAN	AKAP13	A-kinase anchor protein 13	721405	660787	808476	810202	715722	725980
Q7Z591	Q7Z591;Q7Z591-2;Q7Z591-3;Q7Z591-7	AKNA_HUMAN	AKNA	Microtubule organization protein AKNA	1135500	1250660	1300410	1236550	1019290	1185740
Q8TCU4;Q8TCU4-2	Q8TCU4;A0A087WTU9;A0A494C0F1;Q8TCU4-2	ALMS1-2_HUMAN;ALMS1_HUMAN	ALMS1	Alstrom syndrome protein 1	1330550	1099840	1151820	1035550	961936	970689
Q01484	Q01484;I6L894	ANK2_HUMAN	ANK2	Ankyrin-2		335108	408035	497828	403944	321648
Q9NQW6;Q9NQW6-2	Q9NQW6;H7C1K5;Q9NQW6-2	ANLN-2_HUMAN;ANLN_HUMAN	ANLN	Anillin				90933.4
P58335-4	P58335;Q9H6X2;J3KPY9;P58335-2;P58335-4;Q9H6X2-5	ANTR2-4_HUMAN	ANTXR2	Isoform of P58335, Isoform 4 of Anthrax toxin receptor 2	88565.3	61553.6	154087	150767	150658	118458
Q96P48;Q96P48-3	Q96P48;A0A0A0MSJ2;E7EU13;F5GWN4;F8WBT0;Q96P48-1;Q96P48-2;Q96P48-3;Q96P48-4;Q96P48-5;Q96P48-7	ARAP1-3_HUMAN;ARAP1_HUMAN	ARAP1	Arf-GAP with Rho-GAP domain, ANK repeat and PH domain-containing protein 1	969730	966322	987773	832268	916149	877015
P62330	P62330	ARF6_HUMAN	ARF6	ADP-ribosylation factor 6	4131030	4020460	5810310	4731250	4222160	4465450
P53365	P53365;A0A087X1E4;P53365-2;P53365-3	ARFP2_HUMAN	ARFIP2	Arfaptin-2	271697	231751	266158	258772	258108	210395
Q8N392	Q8N392;Q8N392-2	RHG18_HUMAN	ARHGAP18	Rho GTPase-activating protein 18	576270	580670	672425	594306	780819	623767
P42331-4	P42331;C9JB56;H7C4P1;P42331-2;P42331-3;P42331-4;P42331-5;P42331-6	RHG25-4_HUMAN	ARHGAP25	Isoform of P42331, Isoform 4 of Rho GTPase-activating protein 25	3530980	3572720	4278170	3885620	2760140	3762710
P42331-3	P42331;P42331-3	RHG25-3_HUMAN	ARHGAP25	Isoform of P42331, Isoform 3 of Rho GTPase-activating protein 25	1200550	1126830	1245800	1184090	920116	1136030
Q9BRR9-2;Q9BRR9-4	Q9BRR9;J3KPQ4;Q9BRR9-2;Q9BRR9-3;Q9BRR9-4;Q9BRR9-5;R4GN15	RHG09-2_HUMAN;RHG09-4_HUMAN	ARHGAP9	Isoform of Q9BRR9, Isoform 2 of Rho GTPase-activating protein 9	939369	1106630	1323300	1090310	1179350	1137650
P52566	P52566;F5H3P3;H0YGX7	GDIR2_HUMAN	ARHGDIB	Rho GDP-dissociation inhibitor 2	73250100	76726900	77581200	81358300	82088000	79947500
Q6ZSZ5;Q6ZSZ5-5;Q6ZSZ5-6	A0A0A6YYC8;Q6ZSZ5;Q6ZSZ5-5;Q6ZSZ5-6	ARHGI-5_HUMAN;ARHGI-6_HUMAN;ARHGI_HUMAN	ARHGEF18	Rho guanine nucleotide exchange factor 18	288949	254302	377650	236053	320251	286061
Q15052	Q15052;Q15052-2	ARHG6_HUMAN	ARHGEF6	Rho guanine nucleotide exchange factor 6	5831890	6079020	6167030	5947620	5605030	5816320
Q14155-1;Q14155-5	Q14155;A0A2R8YG42;B1ALK7;E9PDQ5;Q14155-1;Q14155-2;Q14155-3;Q14155-5;Q14155-6	ARHG7-1_HUMAN;ARHG7-5_HUMAN	ARHGEF7	Isoform of Q14155, Isoform 1 of Rho guanine nucleotide exchange factor 7	1203910	1128190	1206280	1140900	1274350	1235010
P36405	P36405	ARL3_HUMAN	ARL3	ADP-ribosylation factor-like protein 3	2535690	2142540	2267060	2746320	2862930	3042820
O75915	O75915	PRAF3_HUMAN	ARL6IP5	PRA1 family protein 3	2795450	3107280	3409300	3668430	4506410	2767880
Q92747	Q92747;E9PF58;Q92747-2;A0A1W2PNV4	ARC1A_HUMAN	ARPC1A	Actin-related protein 2/3 complex subunit 1A	759421	589931	564891	606452	648773	803197
O15143	O15143;C9J4Z7;C9J6C8;C9JEY1;C9JFG9;C9JQM8;C9K057;F8VXW2;A0A1W2PNV4	ARC1B_HUMAN	ARPC1B	Actin-related protein 2/3 complex subunit 1B	11542400	13224200	15585000	13844600	13952400	13256000
O15144	O15144	ARPC2_HUMAN	ARPC2	Actin-related protein 2/3 complex subunit 2	19748400	19079500	22589200	19568300	19615600	19720400
O15145	O15145	ARPC3_HUMAN	ARPC3	Actin-related protein 2/3 complex subunit 3	36923500	35749600	37423400	31602200	31059000	33399200
P59998;P59998-3	P59998;F8WCF6;F8WDD7;H7C0A3;P59998-2;P59998-3;A0A0A6YYG9	ARPC4-3_HUMAN;ARPC4_HUMAN	ARPC4	Actin-related protein 2/3 complex subunit 4	35388800	32320900	35771400	28917700	28839300	32245600
O15511	O15511;B1ALC0;O15511-2	ARPC5_HUMAN	ARPC5	Actin-related protein 2/3 complex subunit 5	45791100	42214800	41133000	41763100	37472700	41502500
Q9BPX5	Q9BPX5	ARP5L_HUMAN	ARPC5L	Actin-related protein 2/3 complex subunit 5-like protein	12107500	12619900	13344700	13041100	12597000	13007200
P36575;P36575-2	P36575;A0A087WWQ5;D6RCT3;P36575-2	ARRC-2_HUMAN;ARRC_HUMAN	ARR3	Arrestin-C	722439	663309	838042	555473	1024020	788407
Q9ULH1;Q9ULH1-2	Q9ULH1;A0A0A0MRE5;H0YBF7;Q9ULH1-2	ASAP1-2_HUMAN;ASAP1_HUMAN	ASAP1	Arf-GAP with SH3 domain, ANK repeat and PH domain-containing protein 1	2026970	1813500	1547660	1201170	1706540	1696650
Q9H6U6;Q9H6U6-2;Q9H6U6-3;Q9H6U6-7;Q9H6U6-8	Q9H6U6;K7ESE9;Q9H6U6-2;Q9H6U6-3;Q9H6U6-6;Q9H6U6-7;Q9H6U6-8	BCAS3-2_HUMAN;BCAS3-3_HUMAN;BCAS3-7_HUMAN;BCAS3-8_HUMAN;BCAS3_HUMAN	BCAS3	Breast carcinoma-amplified sequence 3		133725	169369	137327		185703
Q8WUW1;Q8WUW1-2	Q8WUW1;Q8WUW1-2	BRK1-2_HUMAN;BRK1_HUMAN	BRK1	Protein BRICK1	1637000	1609490	1713230	1676950	1728260	1774980
Q5BKX5;Q5BKX5-3	Q5BKX5;Q5BKX5-3	CS054-3_HUMAN;CS054_HUMAN	C19orf54	UPF0692 protein C19orf54	227990	161758		107309	161762
Q01518	Q01518;Q01518-2	CAP1_HUMAN	CAP1	Adenylyl cyclase-associated protein 1	34972100	32302800	34353600	28858000	28709600	33003500
Q01518-2	Q01518-2;Q5T0R9	CAP1-2_HUMAN	CAP1	Isoform of Q01518, Isoform 2 of Adenylyl cyclase-associated protein 1		295515	389886	480721	361074	402384
P40121	P40121;B8ZZL6;E7ENU9;P40121-2	CAPG_HUMAN	CAPG	Macrophage-capping protein	13256200	6842790	11382500	11510300	17275100	14601100
P52907	P47755;P52907	CAZA1_HUMAN	CAPZA1	F-actin-capping protein subunit alpha-1	22974700	22384200	23249600	22129800	20831000	22101500
P47755	P47755;A0A0D9SET8;C9JUG7;F8W9N7;P47755-2	CAZA2_HUMAN	CAPZA2	F-actin-capping protein subunit alpha-2	5034420	5560670	5239950	4857350	5001080	5269580
P47756-2	P47756;B1AK85;B1AK87;B1AK88;P47756-2	CAPZB-2_HUMAN	CAPZB	Isoform of P47756, Isoform 2 of F-actin-capping protein subunit beta	23075900	23341800	23542200	22104300	21378800	22367600
Q6F5E8;Q6F5E8-2	Q6F5E8;Q6F5E8-2	CARL2-2_HUMAN;CARL2_HUMAN	CARMIL2	Capping protein, Arp2/3 and myosin-I linker protein 2	240788	367108	382771	331346	434156	232057
Q9NQ75	Q9NQ75;Q9NQ75-2	CASS4_HUMAN	CASS4	Cas scaffolding protein family member 4		219317				159821
A6NC98	A6NC98;A6NC98-2;A6NC98-4	CC88B_HUMAN	CCDC88B	Coiled-coil domain-containing protein 88B	1528190	1357800	1781950	1735780	1468570	1759010
P48643	P48643;B7ZAR1;E7ENZ3;E9PCA1;P48643-2	TCPE_HUMAN	CCT5	T-complex protein 1 subunit epsilon	13587300	12412200	10963000	12865200	13861300	12797600
P60953	P60953	CDC42_HUMAN	CDC42	Cell division control protein 42 homolog	9189680	8104850	10327400	8970600	6734690	8049110
Q9NRR3	Q9NRR3;D6REL0	C42S2_HUMAN	CDC42SE2	CDC42 small effector protein 2	285376	270789	300492	281812	280442	188907
P13688;P13688-10;P13688-2;P13688-8	P13688;P13688-10;P13688-2;P13688-8	CEAM1-10_HUMAN;CEAM1-2_HUMAN;CEAM1-8_HUMAN;CEAM1_HUMAN	CEACAM1	Carcinoembryonic antigen-related cell adhesion molecule 1	261076	327403	296758	593551	388392	395711
Q66GS9	Q66GS9	CP135_HUMAN	CEP135	Centrosomal protein of 135 kDa	422442	364498	393083	477814	479442	481728
Q8TEP8	Q8TEP8;A0A0A0MR42;H0Y966;K7ELX0;K7ENP4;Q8TEP8-1;Q8TEP8-2	CE192_HUMAN	CEP192	Centrosomal protein of 192 kDa	445401	491367		571319	598986	566625
Q9BV73;Q9BV73-2	Q9BV73;Q9BV73-2	CP250-2_HUMAN;CP250_HUMAN	CEP250	Centrosome-associated protein CEP250	1435440	1371530	1285230	1351780	1208080	1393960
O15078;O15078-2	O15078;J3KNF5;O15078-2	CE290-2_HUMAN;CE290_HUMAN	CEP290	Centrosomal protein of 290 kDa	7892560	6705460	6714210	6820410	5197280	6589580
Q9BYV8;Q9BYV8-2;Q9BYV8-5	Q9BYV8;Q9BYV8-2;Q9BYV8-5	CEP41-2_HUMAN;CEP41-5_HUMAN;CEP41_HUMAN	CEP41	Centrosomal protein of 41 kDa			84150.7	117162	196146
Q53EZ4	Q53EZ4	CEP55_HUMAN	CEP55	Centrosomal protein of 55 kDa	148121	158284	151588	247109	168282	203412
Q86XR8;Q86XR8-2;Q86XR8-3;Q86XR8-4;Q86XR8-5	Q86XR8;F5GYW0;H0YFT8;Q86XR8-2;Q86XR8-3;Q86XR8-4;Q86XR8-5	CEP57-2_HUMAN;CEP57-3_HUMAN;CEP57-4_HUMAN;CEP57-5_HUMAN;CEP57_HUMAN	CEP57	Centrosomal protein of 57 kDa		59960.5
Q8TAP6;Q8TAP6-2	Q8TAP6;K7EP44;K7EPF5;Q8TAP6-2;Q8TAP6-3	CEP76-2_HUMAN;CEP76_HUMAN	CEP76	Centrosomal protein of 76 kDa	264901	190455	291838	213464		283499
Q6P2H3;Q6P2H3-2;Q6P2H3-4	Q6P2H3;Q6P2H3-2;Q6P2H3-4	CEP85-2_HUMAN;CEP85-4_HUMAN;CEP85_HUMAN	CEP85	Centrosomal protein of 85 kDa	187776	104644	115158	156919	172881	215352
Q8IW35;Q8IW35-2	Q8IW35;E9PG22;F8WF91;Q8IW35-2	CEP97-2_HUMAN;CEP97_HUMAN	CEP97	Centrosomal protein of 97 kDa	617186	732449	694063	803640	632614	636042
Q9Y6A4	Q9Y6A4	CFA20_HUMAN	CFAP20	Cilia- and flagella-associated protein 20	896069	955659	1026540	909535	1096710	974877
Q9UEE9	Q9UEE9;Q9UEE9-2	CFDP1_HUMAN	CFDP1	Craniofacial development protein 1	1632370	1640940	1603160	1477080	1914380	1735440
P23528	P23528;Q9Y281;E9PK25;E9PLJ3;E9PP50;E9PQB7;G3V1A4;Q9Y281-3	COF1_HUMAN	CFL1	Cofilin-1	77872000	77481500	78339200	69424700	63228500	64396300
Q99828;Q99828-2	Q99828;Q99828-2	CIB1-2_HUMAN;CIB1_HUMAN	CIB1	Calcium and integrin-binding protein 1	1361200	1316350	1242550	1266960	1317790	1242470
Q14008;Q14008-2;Q14008-3	Q14008;H0YDX5;Q14008-2;Q14008-3	CKAP5-2_HUMAN;CKAP5-3_HUMAN;CKAP5_HUMAN	CKAP5	Cytoskeleton-associated protein 5	1098710	1158670	1420720	1238750	1461340	1091130
O75122-3	O75122;A0A0U1RQI6;B3KR06;E3W994;E7ENG2;E7ERI8;E7EW49;J3KR49;O75122-2;O75122-3	CLAP2-3_HUMAN	CLASP2	Isoform of O75122, Isoform 3 of CLIP-associating protein 2	548189	781389	726509	708560	718784	503093
Q9NZA1;Q9NZA1-2	Q9NZA1;Q9NZA1-2	CLIC5-2_HUMAN;CLIC5_HUMAN	CLIC5	Chloride intracellular channel protein 5	351269	270267	317117	416745	108290	328073
P30622-2	P30622;F5H0N7;F5H1T5;F5H6A0;J3KP58;P30622-1;P30622-2	CLIP1-2_HUMAN	CLIP1	Isoform of P30622, Isoform 3 of CAP-Gly domain-containing linker protein 1	1267440	1465210	1463530	1455780	1355810	1326900
Q99439	Q99439;A0A087X271;B4DDF4;B4DUT8;H3BVI6;K7ES69;Q99439-2	CNN2_HUMAN	CNN2	Calponin-2	12270300	14414200	11256200	10397600	8156020	9529810
Q7Z7A1;Q7Z7A1-5	Q7Z7A1;Q5JVD1;Q7Z7A1-2;Q7Z7A1-5	CNTRL-5_HUMAN;CNTRL_HUMAN	CNTRL	Centriolin	428948	451521	399848	378261	464913	440729
P31146	P31146;H3BRY3	COR1A_HUMAN	CORO1A	Coronin-1A	55232200	47550400	57073300	46561300	47348800	47950200
Q9BR76	Q9BR76	COR1B_HUMAN	CORO1B	Coronin-1B	507966	492043	450323	393538	246140	288560
Q9ULV4;Q9ULV4-2;Q9ULV4-3	Q9ULV4;B4E3S0;F8VRE9;F8VSA4;F8VTT6;F8VUX3;F8VV53;F8VVB7;F8W1H8;Q9ULV4-2;Q9ULV4-3	COR1C-2_HUMAN;COR1C-3_HUMAN;COR1C_HUMAN	CORO1C	Coronin-1C	276458	375142	280778	332073	605111	450793
Q92828	Q92828	COR2A_HUMAN	CORO2A	Coronin-2A	228216	228392	291184	162740	183928	201004
P57737-3	P57737;A0A0A6YYL4;E7EP81;I3L167;P57737-2;P57737-3;P57737-4	CORO7-3_HUMAN	CORO7	Isoform of P57737, Isoform 3 of Coronin-7	7802500	7017680	7426290	6916160	6211450	6954020
Q14019	Q14019	COTL1_HUMAN	COTL1	Coactosin-like protein	70654300	58809000	61567800	59351700	60511600	61717900
O75131	O75131;A0A087WYQ3;E5RHZ0;H0YB26	CPNE3_HUMAN	CPNE3	Copine-3	6831420	6636790	6854270	5922270	6428180	6760720
Q5TZA2;Q5TZA2-2	Q5TZA2;A0A087WW81;B1AKD8;Q5TZA2-2	CROCC-2_HUMAN;CROCC_HUMAN	CROCC	Rootletin	238860	294368	251481	217934	263988	350282
Q7L576	Q7L576;A0A0G2JQT1;A0A0G2JR96	CYFP1_HUMAN	CYFIP1	Cytoplasmic FMR1-interacting protein 1	392641	377343	494146	449460	308262	389559
Q96F07-2	Q96F07;E7EVJ5;E7EW33;H7C229;Q96F07-2	CYFP2-2_HUMAN	CYFIP2	Isoform of Q96F07, Isoform 2 of Cytoplasmic FMR1-interacting protein 2	5420610	5614650	5886140	5032480	5518830	4690410
Q16643	Q16643;D6R9W4;D6RCR4;D6RFI1;Q16643-2;Q16643-3	DREB_HUMAN	DBN1	Drebrin	708712	396545	339299	474453	3819710	1006210
Q14203;Q14203-3;Q14203-4;Q14203-6	Q14203;C9JJD0;C9JJN7;C9JKG6;C9JTE5;C9JZA4;E7EX90;E9PCY0;Q14203-3;Q14203-4;Q14203-6;Q6AWB1	DCTN1-3_HUMAN;DCTN1-4_HUMAN;DCTN1-6_HUMAN;DCTN1_HUMAN	DCTN1	Dynactin subunit 1	2563780	2610050	2666280	2615470	2700340	2690530
Q13561;Q13561-2;Q13561-3	Q13561;F8VRV7;F8VW18;F8W0U6;F8W1I6;Q13561-2;Q13561-3	DCTN2-2_HUMAN;DCTN2-3_HUMAN;DCTN2_HUMAN	DCTN2	Dynactin subunit 2	8512290	7928490	8206210	8430710	8953740	9191800
O75935;O75935-3	O75935;A0A0A0MRV8;O75935-2;O75935-3;X6RA56;X6RCK5;X6RLR1	DCTN3-3_HUMAN;DCTN3_HUMAN	DCTN3	Dynactin subunit 3	2764710	2543730	2592030	2535950	2468770	2745180
Q9UJW0;Q9UJW0-3	Q9UJW0;Q9UJW0-2;Q9UJW0-3	DCTN4-3_HUMAN;DCTN4_HUMAN	DCTN4	Dynactin subunit 4	1438090	1528690	1810670	1602920	1946880	1695520
Q9BTE1;Q9BTE1-2	Q9BTE1;H3BR94;Q9BTE1-2	DCTN5-2_HUMAN;DCTN5_HUMAN	DCTN5	Dynactin subunit 5	942553	1035670	1063220	876003	1010280	926200
O00399	O00399	DCTN6_HUMAN	DCTN6	Dynactin subunit 6	1296330	1352110	1436250	1226450	1271370	1402130
Q8IV53;Q8IV53-2	Q8IV53;Q8IV53-2	DEN1C-2_HUMAN;DEN1C_HUMAN	DENND1C	DENN domain-containing protein 1C	1469430	1460120	1704190	1430840	1273180	1340330
Q08495;Q08495-2;Q08495-3;Q08495-4	Q08495;E5RFK4;E5RGQ0;E5RGQ7;E5RJC0;Q08495-2;Q08495-3;Q08495-4	DEMA-2_HUMAN;DEMA-3_HUMAN;DEMA-4_HUMAN;DEMA_HUMAN	DMTN	Dematin	353508	374765	335141	383053	316793	419101
Q86Y56	Q86Y56;E9PGY2;H0Y650;Q86Y56-2;Q86Y56-3	DAAF5_HUMAN	DNAAF5	Dynein assembly factor 5, axonemal	260239	260882	254989	247271	220891	241454
Q9P2D7;Q9P2D7-8	Q9P2D7;H7C563;Q9P2D7-8	DYH1-8_HUMAN;DYH1_HUMAN	DNAH1	Dynein heavy chain 1, axonemal	138700		207443	164999
Q96DT5	Q96DT5;A0A087WYC6;A0A0C4DFR0	DYH11_HUMAN	DNAH11	Dynein heavy chain 11, axonemal	516567	539467	623163	606761	570967	800780
Q96JB1;Q96JB1-2	Q96JB1;A0A075B6F3;H0Y7V4;Q96JB1-2	DYH8-2_HUMAN;DYH8_HUMAN	DNAH8	Dynein heavy chain 8, axonemal
Q9NYC9;Q9NYC9-2	Q9NYC9;E7EP17;Q9NYC9-2	DYH9-2_HUMAN;DYH9_HUMAN	DNAH9	Dynein heavy chain 9, axonemal	209710	179053	170878		130328	257719
O00429	O00429;G8JLD5;O00429-2;O00429-3;O00429-4;O00429-5;O00429-6;O00429-7;O00429-8	DNM1L_HUMAN	DNM1L	Dynamin-1-like protein	2408090	2503100	2608950	2538420	2448810	2436540
P50570	P50570;Q9UQ16;E5RHK8;P50570-2;P50570-3;P50570-4;P50570-5;Q9UQ16-2;Q9UQ16-3;Q9UQ16-4	DYN2_HUMAN	DNM2	Dynamin-2	5124350	4864420	5267620	4853670	4787500	5083450
P50570-3	Q9UQ16;E5RHK8;E5RIK2;K7EMQ3;P50570-3;P50570-4;Q9UQ16-2;Q9UQ16-3;Q9UQ16-4;Q9UQ16-5	DYN2-3_HUMAN	DNM2	Isoform of P50570, Isoform 3 of Dynamin-2	249228	294138	356406	340756	314128	263751
Q6XZF7;Q6XZF7-2	Q6XZF7;A0A1B0GTX1;A0A1C7CYY6;Q6XZF7-2	DNMBP-2_HUMAN;DNMBP_HUMAN	DNMBP	Dynamin-binding protein	2313150	2116470	2116710	1695140	1949310	2155710
Q96BY6	Q96BY6;A0A2R8YD85;Q96BY6-2;Q96BY6-3	DOC10_HUMAN	DOCK10	Dedicator of cytokinesis protein 10	2216820	2573280	2864580	2284280	2265610	2194250
Q5JSL3	Q5JSL3;A0A0J9YW64;A6NIW2	DOC11_HUMAN	DOCK11	Dedicator of cytokinesis protein 11	3133660	3604440	4088680	2965610	3418330	2931400
Q92608	Q92608;E5RFJ0;E7ERW7;F6S220;H0YB76;Q92608-2	DOCK2_HUMAN	DOCK2	Dedicator of cytokinesis protein 2	2979810	3492860	3878980	3224470	3290320	2580010
Q8NF50	Q8NF50;A2A369;Q8NF50-2;Q8NF50-3;Q8NF50-4	DOCK8_HUMAN	DOCK8	Dedicator of cytokinesis protein 8	4498290	4605450	4503030	4364120	3757240	3683450
Q9BZ29;Q9BZ29-3;Q9BZ29-4;Q9BZ29-5	Q9BZ29;A0A088AWN3;A0A0A0MSY4;H0Y3S1;H7BZ79;Q5JUD3;Q5JUD8;Q9BZ29-3;Q9BZ29-4;Q9BZ29-5	DOCK9-3_HUMAN;DOCK9-4_HUMAN;DOCK9-5_HUMAN;DOCK9_HUMAN	DOCK9	Dedicator of cytokinesis protein 9	451675	570836	619929	394165	507079	471823
Q16555;Q16555-2	Q16555;A0A1C7CYX9;Q16555-2	DPYL2-2_HUMAN;DPYL2_HUMAN	DPYSL2	Dihydropyrimidinase-related protein 2	4701620	4539180	5149260	5280430	9367530	4711560
Q03001;Q03001-14;Q03001-8	Q03001;A0A0U1RQJ2;A0A494C073;E9PHM6;F6QMI7;F8W9J4;Q03001-14;Q03001-8	DYST-14_HUMAN;DYST-8_HUMAN;DYST_HUMAN	DST	Dystonin				301082
P60981;P60981-2	P60981;F6RFD5;P60981-2	DEST-2_HUMAN;DEST_HUMAN	DSTN	Destrin	3236770	3024880	3170890	2795720	2939240	2917260
Q14204	Q14204;A0A2R8Y6H2;A0A2R8Y706;A0A2R8YFZ7	DYHC1_HUMAN	DYNC1H1	Cytoplasmic dynein 1 heavy chain 1	6340000	6994750	7741380	6976660	6931820	5773790
Q13409-2;Q13409-3	Q13409;Q13409-2;Q13409-3;Q13409-5;Q13409-6;Q13409-7	DC1I2-2_HUMAN;DC1I2-3_HUMAN	DYNC1I2	Isoform of Q13409, Isoform 2B of Cytoplasmic dynein 1 intermediate chain 2	1823770	1977480	1984160	1870510	2034370	1865620
Q9Y6G9	Q9Y6G9;E9PHI6	DC1L1_HUMAN	DYNC1LI1	Cytoplasmic dynein 1 light intermediate chain 1	2096970	1945950	1924760	1796990	1940610	1963350
O43237	O43237;B4E2E0;O43237-2	DC1L2_HUMAN	DYNC1LI2	Cytoplasmic dynein 1 light intermediate chain 2	931411	823238	1042340	962643	938643	943145
P63167	P63167;F8VRV5;F8VXL2	DYL1_HUMAN	DYNLL1	Dynein light chain 1, cytoplasmic	554807	692848	728843	692386	570167	560787
Q96FJ2	P63167;Q96FJ2	DYL2_HUMAN	DYNLL2	Dynein light chain 2, cytoplasmic	11327600	12530600	12434500	11845500	10544400	12252300
Q9NP97	Q8TF09;Q9NP97;B1AKR6;H3BQI1	DLRB1_HUMAN	DYNLRB1	Dynein light chain roadblock-type 1	2630060	2388690	2613080	2534640	2637080	2610830
P63172	P63172	DYLT1_HUMAN	DYNLT1	Dynein light chain Tctex-type 1	745234	825051	796516	934038	796372	693155
P51808	P51808;A6NGJ0;F2Z328	DYLT3_HUMAN	DYNLT3	Dynein light chain Tctex-type 3	574227	767437	766696	697943	676156	737104
Q9BUP0	Q9BUP0;H7C0I0	EFHD1_HUMAN	EFHD1	EF-hand domain-containing protein D1	537633	729439	489805			496658
Q8N3D4	Q8N3D4;E9PIH6	EH1L1_HUMAN	EHBP1L1	EH domain-binding protein 1-like protein 1	514756	520930	553829	738635	606626	624676
Q92556	Q92556;Q92556-2;Q92556-3	ELMO1_HUMAN	ELMO1	Engulfment and cell motility protein 1	3042410	2842750	3315570	2735990	2803780	2638360
Q96JJ3	Q96JJ3;Q5JVZ4;Q5JVZ5	ELMO2_HUMAN	ELMO2	Engulfment and cell motility protein 2	941509	1084400	1044950	957557	933128	838813
Q0PNE2;Q0PNE2-2	Q0PNE2;C9IYN7;C9J2D6;C9J9N8;C9JA82;C9JEX8;C9JLH5;F8WE64;Q0PNE2-2	ELP6-2_HUMAN;ELP6_HUMAN	ELP6	Elongator complex protein 6	508313	491314	434367	549052	450953	530684
P50402	P50402	EMD_HUMAN	EMD	Emerin	785105	780339	844361	1159050	1199340	791566
O95834-2;O95834-3	O95834;O95834-2;O95834-3	EMAL2-2_HUMAN;EMAL2-3_HUMAN	EML2	Isoform of O95834, Isoform 2 of Echinoderm microtubule-associated protein-like 2	2760630	2805490	2910550	2939290	3159420	2799690
Q32P44	Q32P44;B7WPE2;G3V195;G3V1D0;H0Y3M3;Q32P44-2	EMAL3_HUMAN	EML3	Echinoderm microtubule-associated protein-like 3	1510090	1772350	1873830	1567140	1782790	1613350
Q9HC35	Q9HC35;B5MBZ0;Q9HC35-2	EMAL4_HUMAN	EML4	Echinoderm microtubule-associated protein-like 4	2686190	3372640	3954680	3208780	2710590	2698430
P11171;P11171-2	P11171;Q9H4G0;Q9Y2J2;A0A0A0MRA8;A0A0C4DH22;A0A1B0GTF8;A0A1B0GWG0;A0A2R8Y420;A0A2R8Y570;A0A2R8Y5G2;A0A2R8Y5Z6;A0A2R8Y6D0;A0A2R8Y6G5;A0A2R8Y6T6;A0A2R8Y7N0;A0A2R8Y7Y3;A0A2R8YCW8;A0A2R8YD30;A0A2R8YFR9;A0A2U3TZH6;A0A3B3ITC5;A0A3B3ITP0;A0A3B3IU06;A0A3B3IUD6;A8K968;P11171-2;P11171-3;P11171-4;P11171-5;P11171-6;P11171-7;Q4VB86;Q4VXN0;Q4VXN1;Q9H4G0-2;Q9H4G0-3;Q9H4G0-4;Q9Y2J2-2;Q9Y2J2-3;Q9Y2J2-4	41-2_HUMAN;41_HUMAN	EPB41	Protein 4.1	2174320	2272010	2353790	2196040	2505730	2335560
P58107	P58107;A0A075B730	EPIPL_HUMAN	EPPK1	Epiplakin	248104	132750	170563	153038	138142	221941
Q9H6S3;Q9H6S3-2;Q9H6S3-3	Q9H6S3;A0A3B3ISQ4;Q9H6S3-2;Q9H6S3-3	ES8L2-2_HUMAN;ES8L2-3_HUMAN;ES8L2_HUMAN	EPS8L2	Epidermal growth factor receptor kinase substrate 8-like protein 2	354022	294842	211082	299644	350948	285844
Q9UI08;Q9UI08-2	Q9UI08;A0A087WYI2;G3V2K5;G3V3G2;G3V535;G3V5F7;Q9UI08-2;Q9UI08-3;Q9UI08-4;Q9UI08-5	EVL-2_HUMAN;EVL_HUMAN	EVL	Ena/VASP-like protein	8122020	8169860	7464950	8038210	8408220	8035920
P15311	P15311;E7EQR4	EZRI_HUMAN	EZR	Ezrin	16188500	17441800	20058700	17193000	16185200	14560100
Q86WN1	Q86WN1;E5RGB1;E5RGT6;Q86WN1-3	FCSD1_HUMAN	FCHSD1	F-BAR and double SH3 domains protein 1	261015	380350	392046	398857	345457	423919
Q86UX7;Q86UX7-2	Q86UX7;F5H1C6;Q86UX7-2	URP2-2_HUMAN;URP2_HUMAN	FERMT3	Fermitin family homolog 3	13943200	16293400	19382700	15861700	15321100	13282800
P98174	P98174;Q96M96;B7Z493;E9PJX4;F8VWL3;F8W1R0;Q96M96-2	FGD1_HUMAN	FGD1	FYVE, RhoGEF and PH domain-containing protein 1	1223470				907330	1153570
Q5JSP0	Q5JSP0	FGD3_HUMAN	FGD3	FYVE, RhoGEF and PH domain-containing protein 3	1992080	2086310	1914820	1800500	1869260	1994730
O95684;O95684-2	O95684;A0A087WV25;O95684-2;O95684-3	FR1OP-2_HUMAN;FR1OP_HUMAN	FGFR1OP	FGFR1 oncogene partner	550111	690803	571262	539320	695582	643593
Q4L180;Q4L180-2	Q4L180;C9JYJ6;Q4L180-2;Q4L180-3;Q4L180-5;Q4L180-6;Q4L180-7	FIL1L-2_HUMAN;FIL1L_HUMAN	FILIP1L	Filamin A-interacting protein 1-like
Q13045-2	Q13045;J3KS54;Q13045-2;Q13045-3	FLII-2_HUMAN	FLII	Isoform of Q13045, Isoform 2 of Protein flightless-1 homolog	2116650	2456580	2854650	2678160	2899420	2326020
P21333;P21333-2	P21333;A0A087WWY3;P21333-2;Q60FE5	FLNA-2_HUMAN;FLNA_HUMAN	FLNA	Filamin-A	19734900	19685100	29789200	19130800	14224300	15962300
A0A087WWY3;Q60FE5	A0A087WWY3;Q60FE5	A0A087WWY3_HUMAN;Q60FE5_HUMAN	FLNA	Isoform of P21333, Filamin-A	215649	300178	520501	187863	147165	125546
O75369;O75369-2;O75369-8;O75369-9	O75369;E7EN95;O75369-2;O75369-3;O75369-4;O75369-5;O75369-6;O75369-7;O75369-8;O75369-9	FLNB-2_HUMAN;FLNB-8_HUMAN;FLNB-9_HUMAN;FLNB_HUMAN	FLNB	Filamin-B	1578900	1432060	1871060	1468630	1266350	1433430
O75955	O75955;A0A140T974;A0A140T9R1;A0A140T9W4;O75955-2	FLOT1_HUMAN	FLOT1	Flotillin-1	1638460	1770110	1539240	1569020	1837880	1457150
Q14254	Q14254;E7EMK3;J3QLD9	FLOT2_HUMAN	FLOT2	Flotillin-2	542247	594370	616483	698173	769201	594204
O95466-2	O95466;A0A0A0MR62;K7EJE6;K7EK60;O95466-2;O95466-3	FMNL1-2_HUMAN	FMNL1	Isoform of O95466, Isoform 2 of Formin-like protein 1	3430540	3644820	4263900	3875590	3483680	3019370
Q96RU3;Q96RU3-2;Q96RU3-3;Q96RU3-4;Q96RU3-5	Q96RU3;B7ZL14;H0Y7W6;Q96RU3-2;Q96RU3-3;Q96RU3-4;Q96RU3-5	FNBP1-2_HUMAN;FNBP1-3_HUMAN;FNBP1-4_HUMAN;FNBP1-5_HUMAN;FNBP1_HUMAN	FNBP1	Formin-binding protein 1	4469200	4347420	4673380	4194320	4300760	4143770
Q8N3X1;Q8N3X1-2	Q8N3X1;Q8N3X1-2	FNBP4-2_HUMAN;FNBP4_HUMAN	FNBP4	Formin-binding protein 4	1510040	1431710	1395140	1358780	1370920	1467150
Q5VW36	Q5VW36	FOCAD_HUMAN	FOCAD	Focadhesin	496393	574756	558926	481881	512894	415724
O94915-2	A0A2C9F2R7;O94915-2	FRYL-2_HUMAN	FRYL	Isoform of O94915, Isoform 2 of Protein furry homolog-like	147670	214607	152292	250915	134832	126899
Q16658	Q16658;A0A0A0MSB2;C9JFC0;C9JPH9	FSCN1_HUMAN	FSCN1	Fascin	758003	684785	469259	1737290	2655060	1161660
O95166	O95166;H6UMI1;I3L3J4	GBRAP_HUMAN	GABARAP	Gamma-aminobutyric acid receptor-associated protein	220226	189314	316999	247939	293318	251182
A0A1W2PQU7	A0A1W2PQU7	A0A1W2PQU7_HUMAN	GFAP	Isoform of P14136, Glial fibrillary acidic protein (Fragment)					517249	286460
Q9Y2X7	Q9Y2X7;A0A0C4DGN6;J3QLH1;J3QRU8;Q9Y2X7-3	GIT1_HUMAN	GIT1	ARF GTPase-activating protein GIT1	3122920	2463870	2425900	2203650	2314800	2616490
Q14161	Q14161;F8VXI9;F8W822;F8WAK2;Q14161-10;Q14161-11;Q14161-2;Q14161-3;Q14161-4;Q14161-5;Q14161-6;Q14161-7;Q14161-8;Q14161-9;R4GNG3	GIT2_HUMAN	GIT2	ARF GTPase-activating protein GIT2	3419460	3467220	3423280	3353160	3142850	3232570
Q14161-9	F8WAK2;Q14161-10;Q14161-5;Q14161-8;Q14161-9;R4GNG3	GIT2-9_HUMAN	GIT2	Isoform of Q14161, Isoform 9 of ARF GTPase-activating protein GIT2	673549	563269	598382	679316		604645
P60983	P60983;G3V4P8	GMFB_HUMAN	GMFB	Glia maturation factor beta	2023790	1834730	1844140	1814810	1790970	1901160
O60234	O60234;P60983;G3V4P8;M0QYG8;M0QYJ8;M0R0C1;M0R1D2	GMFG_HUMAN	GMFG	Glia maturation factor gamma	30303000	27294400	26337600	26265200	25888300	26566700
Q9P107	Q9P107;K7EJC2;Q9P107-2	GMIP_HUMAN	GMIP	GEM-interacting protein	2176420	2238460	2290510	2351300	2270390	2214580
P46926	P46926;Q8TDQ7;D6R917;D6R9P4;D6RAY7;D6RB13;P46926-2;Q8TDQ7-2;Q8TDQ7-3	GNPI1_HUMAN	GNPDA1	Glucosamine-6-phosphate isomerase 1	5696990	6743350	5609480	4991540	4134510	5988320
Q9NQX3;Q9NQX3-2	Q9NQX3;F5H039;G3V355;G3V4R0;G3V582;Q9NQX3-2	GEPH-2_HUMAN;GEPH_HUMAN	GPHN	Gephyrin	1173170	1227380	1035950	1154750	1250190	1096740
P06396;P06396-2;P06396-3;P06396-4	P06396;A0A0A0MS51;A0A0A0MT01;P06396-2;P06396-3;P06396-4	GELS-2_HUMAN;GELS-3_HUMAN;GELS-4_HUMAN;GELS_HUMAN	GSN	Gelsolin	771494	652415	815850	1303020	1318130	1709860
Q86VS8	Q86VS8	HOOK3_HUMAN	HOOK3	Protein Hook homolog 3	1623240	1555910	1626570	1592940	1703760	1631060
P05362	P05362;E7ESS4	ICAM1_HUMAN	ICAM1	Intercellular adhesion molecule 1	263063	289954	366686	722873	548636	441807
P13598	P13598;J3QKR4;J3QQR8;J3QQX6;J3QRQ1;J3QRT5	ICAM2_HUMAN	ICAM2	Intercellular adhesion molecule 2	1074710			772355	830631	731285
P32942	P32942;K7ERN2	ICAM3_HUMAN	ICAM3	Intercellular adhesion molecule 3	4533180	4000270	5695810	6417020	5822990	5683780
Q13325	Q13325;Q13325-2	IFIT5_HUMAN	IFIT5	Interferon-induced protein with tetratricopeptide repeats 5	448074	512745	573782	586849	678772	918896
Q13418	Q13418;A0A0A0MTH3	ILK_HUMAN	ILK	Integrin-linked protein kinase	1904090	1667060	1781250	1827880	1631710	1787530
Q9H0C8	Q9H0C8;E9PC05	ILKAP_HUMAN	ILKAP	Integrin-linked kinase-associated serine/threonine phosphatase 2C	2059580	1965020	1597460	1787690	1759190	2086600
Q27J81;Q27J81-2	Q27J81;A0A0A0MQU1;Q27J81-2	INF2-2_HUMAN;INF2_HUMAN	INF2	Inverted formin-2	478603	490141	485720	512885	464702	408917
Q9BT40;Q9BT40-2	Q9BT40;C9JZB0;I3L0Y0;I3L2L1;K7EPG6;Q9BT40-2	INP5K-2_HUMAN;INP5K_HUMAN	INPP5K	Inositol polyphosphate 5-phosphatase K	617711	581061	736957	656061	569380	543919
P46940	P46940;H0YLE8	IQGA1_HUMAN	IQGAP1	Ras GTPase-activating-like protein IQGAP1	4422870	4507470	6779030	5156970	7377220	4426860
Q13576	Q13576	IQGA2_HUMAN	IQGAP2	Ras GTPase-activating-like protein IQGAP2	1858070	1957940	2797090	2172290	2598900	2287130
Q6DN90;Q6DN90-2	Q6DN90;A0A087WWK8;A0A0C4DGT3;A0A2R8Y695;A0A2R8Y7T6;A0A3B3IRZ4;A0A3B3IU98;Q6DN90-2	IQEC1-2_HUMAN;IQEC1_HUMAN	IQSEC1	IQ motif and SEC7 domain-containing protein 1	344778	467307	371472	444785	554776	397648
P08514;P08514-2;P08514-3	P08514;P08514-2;P08514-3	ITA2B-2_HUMAN;ITA2B-3_HUMAN;ITA2B_HUMAN	ITGA2B	Integrin alpha-IIb				933897
P13612	P13612	ITA4_HUMAN	ITGA4	Integrin alpha-4	3067450	2131310	1887710	2564640	1782230	1762080
P08648	P08648	ITA5_HUMAN	ITGA5	Integrin alpha-5	1843980	1337370	1550220	1753140	1663830	1746190
P23229;P23229-2;P23229-3;P23229-4;P23229-5;P23229-6;P23229-9	P23229;P23229-2;P23229-3;P23229-4;P23229-5;P23229-6;P23229-7;P23229-9	ITA6-2_HUMAN;ITA6-3_HUMAN;ITA6-4_HUMAN;ITA6-5_HUMAN;ITA6-6_HUMAN;ITA6-9_HUMAN;ITA6_HUMAN	ITGA6	Integrin alpha-6	510406	571642	717233	435168		432346
P20701;P20701-2	P20701;B4DQ77;P20701-2	ITAL-2_HUMAN;ITAL_HUMAN	ITGAL	Integrin alpha-L	6958710	6663820	9169410	6375920	6100430	6954180
P11215;P11215-2	P11215;P11215-2	ITAM-2_HUMAN;ITAM_HUMAN	ITGAM	Integrin alpha-M	1459260	1075970	1178430	901401	803180	947419
P05556	P05556	ITB1_HUMAN	ITGB1	Integrin beta-1	1031050	871018	1532170	1585790	1049810	1312480
O14713	O14713;A8MPU2;C9J0J6;C9J5T5;C9J6Y2;C9JBU8;C9JZ07;G3V1A3;O14713-2	ITBP1_HUMAN	ITGB1BP1	Integrin beta-1-binding protein 1	345573	365355	473987	393271	393884	314873
P05107	P05107;A0A494C0X7;D3DSM0	ITB2_HUMAN	ITGB2	Integrin beta-2	8838570	9074020	12714700	8456680	8282620	9145080
A0A494C0X7;D3DSM0	A0A494C0X7;D3DSM0	A0A494C0X7_HUMAN;D3DSM0_HUMAN	ITGB2	Isoform of P05107, Integrin beta-2	1638010	1802450	2222110	1557690	1583400	1438580
P18084	P18084;H7C580;V9GYZ1;V9GZ57	ITB5_HUMAN	ITGB5	Integrin beta-5	6840790					6317660
P18564;P18564-2	P18564;A0A087WXP3;E9PEE8;P18564-2	ITB6-2_HUMAN;ITB6_HUMAN	ITGB6	Integrin beta-6		815340		1449630	1035460
P26010	P26010;F5H6T4;F8VNX4;P26010-2	ITB7_HUMAN	ITGB7	Integrin beta-7	2137310	1608260	1318360	1644520	1145230	1337800
Q96N16;Q96N16-2;Q96N16-3;Q96N16-4	Q96N16;F2Z2K5;Q96N16-2;Q96N16-3;Q96N16-4;Q96N16-5;Q96N16-6;Q96N16-7	JKIP1-2_HUMAN;JKIP1-3_HUMAN;JKIP1-4_HUMAN;JKIP1_HUMAN	JAKMIP1	Janus kinase and microtubule-interacting protein 1				235378	285823	220888
Q86YT9;Q86YT9-2;Q86YT9-3;Q86YT9-4	Q86YT9;A0A1W2PRS4;E9PKK2;E9PR26;Q86YT9-2;Q86YT9-3;Q86YT9-4	JAML-2_HUMAN;JAML-3_HUMAN;JAML-4_HUMAN;JAML_HUMAN	JAML	Junctional adhesion molecule-like	333265	192473	255142	283729	256575	418941
Q9UK76;Q9UK76-2	Q9UK76;J3KT51;Q9UK76-2	JUPI1-2_HUMAN;JUPI1_HUMAN	JPT1	Jupiter microtubule associated homolog 1	3037320	3307720	3501570	3766150	3120610	2984770
Q9H910;Q9H910-2;Q9H910-3	Q9H910;A6NGP5;H3BMT0;H3BMV3;H3BTV5;H3BU16;Q9H910-2;Q9H910-3	JUPI2-2_HUMAN;JUPI2-3_HUMAN;JUPI2_HUMAN	JPT2	Jupiter microtubule associated homolog 2	2560250	2891080	2443950	2690850	2344140	2261950
Q8IYT4;Q8IYT4-2	Q8IYT4;K7EIJ8;K7EM02;K7EPQ6;Q8IYT4-2	KATL2-2_HUMAN;KATL2_HUMAN	KATNAL2	Katanin p60 ATPase-containing subunit A-like 2	17515000	13978500	15217800	14294000	13221000	17234800
P52732	P52732	KIF11_HUMAN	KIF11	Kinesin-like protein KIF11	918196	834397	798853	982055	722748	976128
Q9NQT8	Q9NQT8;E7ERX9	KI13B_HUMAN	KIF13B	Kinesin-like protein KIF13B	1411470	1279420	1342400	1367850	1287520	1372510
Q9NS87;Q9NS87-2;Q9NS87-4	Q9NS87;C9JKA9;Q9NS87-2;Q9NS87-3;Q9NS87-4	KIF15-2_HUMAN;KIF15-4_HUMAN;KIF15_HUMAN	KIF15	Kinesin-like protein KIF15	597242	642560	526802	693240	429881	571900
O60333;O60333-2;O60333-4	O43896;O60333;Q12756;A0A087WWA3;A0A3B3IT28;A0A3B3ITE5;A0A3B3ITF7;A0A3B3ITW6;A0A3B3IU40;A0A3B3IUA1;A0A3F2YNW9;F8W8V9;H7C0K6;O60333-2;O60333-3;O60333-4;Q12756-2;Q12756-3;Q4R9M9	KIF1B-2_HUMAN;KIF1B-4_HUMAN;KIF1B_HUMAN	KIF1B	Kinesin-like protein KIF1B	122215	155655	196506	198569	141961	154375
O75037;O75037-2;O75037-3;O75037-4	O75037;Q7Z4S6;A0A1B0GV47;H0YIM7;O75037-2;O75037-3;O75037-4;Q7Z4S6-2;Q7Z4S6-3;Q7Z4S6-4;Q7Z4S6-5;Q7Z4S6-6	KI21B-2_HUMAN;KI21B-3_HUMAN;KI21B-4_HUMAN;KI21B_HUMAN	KIF21B	Kinesin-like protein KIF21B	163579	115272	59832.6	172980	101132	143337
Q14807;Q14807-2	Q14807;H3BRB3;H3BTH5;Q14807-2	KIF22-2_HUMAN;KIF22_HUMAN	KIF22	Kinesin-like protein KIF22			182030	473596	267043	249814
O00139-2	O00139;D6R9M0;O00139-1;O00139-2;O00139-4;O00139-5	KIF2A-2_HUMAN	KIF2A	Isoform of O00139, Isoform 2 of Kinesin-like protein KIF2A	1616250	1568190	1972730	2761280	2405180	2183580
Q99661	Q99661;Q99661-2	KIF2C_HUMAN	KIF2C	Kinesin-like protein KIF2C	319256	342242	276990	668271	726731	570191
Q9Y496	Q9Y496;A0A087X011;E9PES4;H7C2F6;J3KPF9	KIF3A_HUMAN	KIF3A	Kinesin-like protein KIF3A	285680	274928	266817	305175	253398	281126
O95239	O95239;Q2VIQ3;O95239-2	KIF4A_HUMAN	KIF4A	Chromosome-associated kinesin KIF4A		156214		132407	123980
P33176	O60282;P33176;Q12840;A0A0G2JMZ6	KINH_HUMAN	KIF5B	Kinesin-1 heavy chain	1663100	1761350	2244380	1997160	2119800	1802270
O60282	O60282;Q12840;A0A0G2JMZ6;J3KNA1;O60282-2	KIF5C_HUMAN	KIF5C	Kinesin heavy chain isoform 5C	76134.9	78342.1	124323	121035	77608.6	97992
Q92845;Q92845-2;Q92845-3	Q92845;Q92845-2;Q92845-3	KIFA3-2_HUMAN;KIFA3-3_HUMAN;KIFA3_HUMAN	KIFAP3	Kinesin-associated protein 3	233368	279339	244508	242535	162173	213868
Q9BW19	Q9BW19	KIFC1_HUMAN	KIFC1	Kinesin-like protein KIFC1	114305	132964	194144	230364	230142	185745
Q07866;Q07866-10;Q07866-2;Q07866-3;Q07866-4;Q07866-5;Q07866-6;Q07866-7;Q07866-8;Q07866-9	Q07866;F8W6L3;G3V2E7;G3V3H3;G3V5R9;G5E9S8;Q07866-10;Q07866-2;Q07866-3;Q07866-4;Q07866-5;Q07866-6;Q07866-7;Q07866-8;Q07866-9;E7EVH7	KLC1-10_HUMAN;KLC1-2_HUMAN;KLC1-3_HUMAN;KLC1-4_HUMAN;KLC1-5_HUMAN;KLC1-6_HUMAN;KLC1-7_HUMAN;KLC1-8_HUMAN;KLC1-9_HUMAN;KLC1_HUMAN	KLC1	Kinesin light chain 1	2425760	2262060	2389960	2407110	2238340	2338580
Q9H0B6;Q9H0B6-2	Q9H0B6;Q9H0B6-2	KLC2-2_HUMAN;KLC2_HUMAN	KLC2	Kinesin light chain 2	839068	807320	916200	968625	821867	944084
Q9NSK0;Q9NSK0-3;Q9NSK0-5	Q9NSK0;H7C4M1;Q9NSK0-3;Q9NSK0-5	KLC4-3_HUMAN;KLC4-5_HUMAN;KLC4_HUMAN	KLC4	Kinesin light chain 4	199586	244092	150652	217896	257975	210185
P04264	P04259;P04264	K2C1_HUMAN	KRT1	Keratin, type II cytoskeletal 1	3681800	2499060	3089300	958731	1527100	5114590
P13645	P13645	K1C10_HUMAN	KRT10	Keratin, type I cytoskeletal 10	1415160	1196740	1068870	746788	771752	1615870
P02533	P02533;P08727;P08779;P19012;Q04695;A8MT21;C9JM50;C9JTG5;F5GWP8;K7EMS3;K7EPJ9;P19012-2	K1C14_HUMAN	KRT14	Keratin, type I cytoskeletal 14	976385		575228			666445
P08779	P08779	K1C16_HUMAN	KRT16	Keratin, type I cytoskeletal 16				131990
P35908	P35908	K22E_HUMAN	KRT2	Keratin, type II cytoskeletal 2 epidermal	922782	763825	727789	576824	589912	1613540
P13647	P13647;H0YI76;H0YIN9	K2C5_HUMAN	KRT5	Keratin, type II cytoskeletal 5	362869	348828	365628			409814
P02538	O95678;P02538;P48668	K2C6A_HUMAN	KRT6A	Keratin, type II cytoskeletal 6A	335610				189591	301424
P04259	P04259;P48668	K2C6B_HUMAN	KRT6B	Keratin, type II cytoskeletal 6B
P35527	P35527	K1C9_HUMAN	KRT9	Keratin, type I cytoskeletal 9	2569270	1967980	2165240	915175	786123	3830880
Q14847	Q14847;C9J9W2;Q14847-2;Q14847-3	LASP1_HUMAN	LASP1	LIM and SH3 domain protein 1	17308700	18227000	18057000	17875300	18817600	18954900
Q14739	Q14739;A0A494C1L1;C9JXK0	LBR_HUMAN	LBR	Delta(14)-sterol reductase	1512810	1195270	1664290	1846660	3430860	1425570
P13796	P13796;P13796-2	PLSL_HUMAN	LCP1	Plastin-2	169291000	147881000	165968000	142693000	154378000	158345000
Q9UHB6;Q9UHB6-2	Q9UHB6;F8VQE1;F8VRN8;Q9UHB6-2;Q9UHB6-4;Q9UHB6-5	LIMA1-2_HUMAN;LIMA1_HUMAN	LIMA1	LIM domain and actin-binding protein 1	3435910	4963950	3680890	6658840	4097060	3369100
P48059-5	F8WE10;P48059-5	LIMS1-5_HUMAN	LIMS1	Isoform of P48059, Isoform 5 of LIM and senescent cell antigen-like-containing domain protein 1	2660750	2053690	2236890	2484200	2139560	2254640
Q9NUP9	Q9NUP9;G3V1D4	LIN7C_HUMAN	LIN7C	Protein lin-7 homolog C	446230	474198	457123	320033	368001	347811
Q93052	Q93052;A0A087WZF1;C9JUT4;C9JXK9	LPP_HUMAN	LPP	Lipoma-preferred partner	863416	913909	958909	910099	897649	929205
O60711;O60711-2	O60711;B7Z5P7;O60711-2	LPXN-2_HUMAN;LPXN_HUMAN	LPXN	Leupaxin	6024230	5662260	6028640	7090470	6730400	6436120
Q96II8	Q96II8;E9PD99;Q96II8-2;Q96II8-3;Q96II8-4	LRCH3_HUMAN	LRCH3	Leucine-rich repeat and calponin homology domain-containing protein 3	2014220	1800820	1722740	1906400	1695830	1904380
P33241	P33241;P33241-2;P33241-3	LSP1_HUMAN	LSP1	Lymphocyte-specific protein 1	25772900	27278200	26938900	28378300	35888300	27648500
Q9UPN3	Q9UPN3;E9PLY5;E9PNZ4;H0Y390;H3BPE1;H3BQK9;Q9UPN3-2;Q9UPN3-3;Q9UPN3-4	MACF1_HUMAN	MACF1	Microtubule-actin cross-linking factor 1, isoforms 1/2/3/5	1698310	1952710	1980190	2234600	1960170	1487760
Q9UPN3-2;Q9UPN3-3	H3BPE1;H3BQK9;Q9UPN3-2;Q9UPN3-3;Q9UPN3-5	MACF1-2_HUMAN;MACF1-3_HUMAN	MACF1	Isoform of Q9UPN3, Isoform 2 of Microtubule-actin cross-linking factor 1, isoforms 1/2/3/5	436572	491313	553550	533835	508101
P78559;P78559-2	P46821;P78559;E9PGC8;P78559-2	MAP1A-2_HUMAN;MAP1A_HUMAN	MAP1A	Microtubule-associated protein 1A	186869		179781	193144	222371	181855
A6NCE7;Q9GZQ8	A6NCE7;Q9GZQ8;H3BTL1	MLP3B_HUMAN;MP3B2_HUMAN	MAP1LC3B;MAP1LC3B2	Microtubule-associated proteins 1A/1B light chain 3 beta 2	7384580		5541110	6328490	6247840	7690240
Q66K74-2	Q66K74;Q66K74-2	MAP1S-2_HUMAN	MAP1S	Isoform of Q66K74, Isoform 2 of Microtubule-associated protein 1S	671165	550616	774098	719998	950004	716058
P27816	P27816;E7EVA0;P27816-2;P27816-6	MAP4_HUMAN	MAP4	Microtubule-associated protein 4	2593350	2660740	3666590	3309880	4213540	2651100
Q15691	Q15691	MARE1_HUMAN	MAPRE1	Microtubule-associated protein RP/EB family member 1	4428480	4475660	4895750	4057420	3779050	4012870
Q15555;Q15555-3;Q15555-5	Q15555;Q15555-3;Q15555-4;Q15555-5	MARE2-3_HUMAN;MARE2-5_HUMAN;MARE2_HUMAN	MAPRE2	Microtubule-associated protein RP/EB family member 2	1041380	1175310	995411	1079240	1241430	1049110
Q9UPY8;Q9UPY8-2	Q9UPY8;C9JB30;Q9UPY8-2	MARE3-2_HUMAN;MARE3_HUMAN	MAPRE3	Microtubule-associated protein RP/EB family member 3	836239	655544	827788	821925	668447	977914
P49006	P49006	MRP_HUMAN	MARCKSL1	MARCKS-related protein	545741	673182	472617	443314	482308	468770
P27448;P27448-2;P27448-3;P27448-4;P27448-6;P27448-7;P27448-8;Q9P0L2;Q9P0L2-2;Q9P0L2-3	P27448;Q9P0L2;A0A087X0I6;A0A0A0MSZ1;A2SY06;B4DIB3;H0YIY6;H0YKP9;J3KNR0;P27448-2;P27448-3;P27448-4;P27448-6;P27448-7;P27448-8;Q9P0L2-2;Q9P0L2-3	MARK1-2_HUMAN;MARK1-3_HUMAN;MARK1_HUMAN;MARK3-2_HUMAN;MARK3-3_HUMAN;MARK3-4_HUMAN;MARK3-6_HUMAN;MARK3-7_HUMAN;MARK3-8_HUMAN;MARK3_HUMAN	MARK1;MARK3	MAP/microtubule affinity-regulating kinase 3	276611	290586	370154	334281	262229	414246
Q7KZI7;Q7KZI7-11;Q7KZI7-12;Q7KZI7-14;Q7KZI7-3;Q7KZI7-6;Q7KZI7-8	Q7KZI7;E7ETY4;E9PC69;Q7KZI7-10;Q7KZI7-11;Q7KZI7-12;Q7KZI7-13;Q7KZI7-14;Q7KZI7-15;Q7KZI7-16;Q7KZI7-2;Q7KZI7-3;Q7KZI7-4;Q7KZI7-5;Q7KZI7-6;Q7KZI7-7;Q7KZI7-8;Q7KZI7-9	MARK2-11_HUMAN;MARK2-12_HUMAN;MARK2-14_HUMAN;MARK2-3_HUMAN;MARK2-6_HUMAN;MARK2-8_HUMAN;MARK2_HUMAN	MARK2	Serine/threonine-protein kinase MARK2	653746	803078	933063	846767	776224	853099
O15021;O15021-2;O15021-3;O15021-6	O15021;H7C1I9;O15021-2;O15021-3;O15021-6	MAST4-2_HUMAN;MAST4-3_HUMAN;MAST4-6_HUMAN;MAST4_HUMAN	MAST4	Microtubule-associated serine/threonine-protein kinase 4	154739		173606	218907		173933
Q9Y316;Q9Y316-3	Q9Y316;Q9Y316-2;Q9Y316-3	MEMO1-3_HUMAN;MEMO1_HUMAN	MEMO1	Protein MEMO1	2179070	1920370	1942440	1873380	1896210	1932920
Q9GZY8;Q9GZY8-2;Q9GZY8-3;Q9GZY8-4;Q9GZY8-5	Q9GZY8;A0A0A0MS29;E9PPW6;H7C433;Q9GZY8-2;Q9GZY8-3;Q9GZY8-4;Q9GZY8-5	MFF-2_HUMAN;MFF-3_HUMAN;MFF-4_HUMAN;MFF-5_HUMAN;MFF_HUMAN	MFF	Mitochondrial fission factor	380666	455652	436182	503453	375185	456484
Q8TDZ2;Q8TDZ2-4	Q8TDZ2;H0Y6Z4;Q8TDZ2-2;Q8TDZ2-4	MICA1-4_HUMAN;MICA1_HUMAN	MICAL1	[F-actin]-monooxygenase MICAL1	1225690	1947800	1802700	1814850	1657400	1577530
Q9BRT3	Q9BRT3	MIEN1_HUMAN	MIEN1	Migration and invasion enhancer 1	2143650	2552170	2597540	2588920	2341590	2279420
Q5JXC2;Q5JXC2-2	Q5JXC2;Q5JXC2-2	MIIP-2_HUMAN;MIIP_HUMAN	MIIP	Migration and invasion-inhibitory protein	231867	150614	123343	134392	224192	253872
Q9UL63;Q9UL63-2	Q9UL63;C9J7E8;Q9UL63-2	MKLN1-2_HUMAN;MKLN1_HUMAN	MKLN1	Muskelin	60798.6	75066.1	50443.6	218522	91680.6	107310
Q70IA6;Q70IA6-3	Q70IA6;A0A087WVS8;Q70IA6-2;Q70IA6-3	MOB2-3_HUMAN;MOB2_HUMAN	MOB2	MOB kinase activator 2	1147860	1029620	1062920	819641	898966	1142260
Q00013;Q00013-2	Q00013;A8MTH1;C9JB34;Q00013-2;Q00013-3	EM55-2_HUMAN;EM55_HUMAN	MPP1	55 kDa erythrocyte membrane protein	491091	561232	518181	541102	715864	657426
Q13368	Q13368;A0A0C4DGP3;D3DX46	MPP3_HUMAN	MPP3	MAGUK p55 subfamily member 3					8812940
Q6WCQ1;Q6WCQ1-2;Q6WCQ1-3	Q6WCQ1;A0A494BZV2;H0Y2S9;J3KSW8;Q6WCQ1-2;Q6WCQ1-3	MPRIP-2_HUMAN;MPRIP-3_HUMAN;MPRIP_HUMAN	MPRIP	Myosin phosphatase Rho-interacting protein	297665	357659	420646	359005	314290	326956
A0A494BZV2;H0Y2S9	A0A494BZV2;H0Y2S9	A0A494BZV2_HUMAN;H0Y2S9_HUMAN	MPRIP	Isoform of Q6WCQ1, Myosin phosphatase Rho-interacting protein	148514	248096	306771	265174	167636	225730
P26038	P26038	MOES_HUMAN	MSN	Moesin	52679500	48452400	65171600	50380400	52923800	51868800
E9PNV3;E9PQ82;V9GZ54	E9PNV3;E9PQ82;V9GZ54	E9PNV3_HUMAN;E9PQ82_HUMAN;V9GZ54_HUMAN	MSN;RDX	Isoform of P35241, Radixin (Fragment)		95773.1	412802	253731	307540
Q96S97	Q96S97;A0A494C017;C9J5M0;C9JC07;C9JJV6;C9JZL8	MYADM_HUMAN	MYADM	Myeloid-associated differentiation marker	1150640	1237730	1717810	1757630	1797030	815201
P35580;P35580-2;P35580-3;P35580-4;P35580-5	P35580;P35580-2;P35580-3;P35580-4;P35580-5	MYH10-2_HUMAN;MYH10-3_HUMAN;MYH10-4_HUMAN;MYH10-5_HUMAN;MYH10_HUMAN	MYH10	Myosin-10	276014	316019	278248	313099	480879	379581
Q7Z406-4;Q7Z406-5	Q7Z406;M0QY43;Q7Z406-2;Q7Z406-4;Q7Z406-5;Q7Z406-6	MYH14-4_HUMAN;MYH14-5_HUMAN	MYH14	Isoform of Q7Z406, Isoform 4 of Myosin-14	2326190		2955840			1932200
P35579	P35579;B1AH99;Q5BKV1	MYH9_HUMAN	MYH9	Myosin-9	40558800	47352000	52704700	41761800	36046800	38845800
P05976;P05976-2;P08590	P05976;P08590;P05976-2	MYL1-2_HUMAN;MYL1_HUMAN;MYL3_HUMAN	MYL1;MYL3	Myosin light chain 1/3, skeletal muscle isoform	16968000	19473600	19522200	19696100	17761700	17194400
O14950;P19105	O14950;P19105;J3QRS3	ML12A_HUMAN;ML12B_HUMAN	MYL12A;MYL12B	Myosin regulatory light chain 12B	32917200	32897500	35012800	29607400	29119200	30699800
P60660-2	P60660;B7Z6Z4;F8VPF3;F8VZU9;F8W180;F8W1R7;G3V1V0;G3V1Y7;G8JLA2;J3KND3;P60660-2	MYL6-2_HUMAN	MYL6	Isoform of P60660, Isoform Smooth muscle of Myosin light polypeptide 6	53031300	50791000	54666800	52058300	47026300	52439500
P14649	P14649;F8W1I5	MYL6B_HUMAN	MYL6B	Myosin light chain 6B	69510.4	140853		127584	185251
Q92614;Q92614-4	Q92614;A0A0D9SFK2;H0YEV9;Q92614-2;Q92614-3;Q92614-4	MY18A-4_HUMAN;MY18A_HUMAN	MYO18A	Unconventional myosin-XVIIIa	1505580	1703290	1992900	1455400	1508370	1240570
O00159;O00159-3	O00159;F5H6E2;O00159-2;O00159-3	MYO1C-3_HUMAN;MYO1C_HUMAN	MYO1C	Unconventional myosin-Ic	1827410	1621120	2038360	1865590	1094000	1083690
Q12965	Q12965;H0YLE5	MYO1E_HUMAN	MYO1E	Unconventional myosin-Ie			178671	187052	358863	191587
O00160	O00160	MYO1F_HUMAN	MYO1F	Unconventional myosin-If	1811540	1680670	2503110	2118520	2346810	1951380
B0I1T2	B0I1T2;O94832;A0A3B3IU30;B0I1T2-2;B0I1T2-3;B0I1T2-4;F8WEW9;J3KRL0;J3QRN6;K7EIG7	MYO1G_HUMAN	MYO1G	Unconventional myosin-Ig	9468830	10306000	12676100	10676300	8119050	6966950
Q9Y4I1;Q9Y4I1-2;Q9Y4I1-3	Q9Y4I1;A0A087WY00;F8W6H6;F8WE88;G3V394;Q9Y4I1-2;Q9Y4I1-3	MYO5A-2_HUMAN;MYO5A-3_HUMAN;MYO5A_HUMAN	MYO5A	Unconventional myosin-Va	1307430	1376960	1588750	1476070	1121400	1218470
Q13459;Q13459-2	B2RTY4;Q13459;B2RTY4-2;B2RTY4-4;B2RTY4-5;H3BMM1;H3BRD5;M0R0P8;M0R300;Q13459-2	MYO9B-2_HUMAN;MYO9B_HUMAN	MYO9B	Unconventional myosin-IXb	481831	552579	590407	619607	733950	502520
O43639	O43639	NCK2_HUMAN	NCK2	Cytoplasmic protein NCK2	1116810	1404890	1431220	1395740	1145950	1533160
P55160	P55160;F8W050;P55160-2	NCKPL_HUMAN	NCKAP1L	Nck-associated protein 1-like	1926690	2145830	2417710	2018490	2057960	1784760
Q9NXR1;Q9NXR1-1	Q9NXR1;I3L2R3;I3L2R9;I3L522;Q9NXR1-1	NDE1-1_HUMAN;NDE1_HUMAN	NDE1	Nuclear distribution protein nudE homolog 1	641490	643201	649120	602011	686532	546391
P20929;P20929-2;P20929-3;P20929-4	P20929;A0A087X1N7;P20929-2;P20929-3;P20929-4	NEBU-2_HUMAN;NEBU-3_HUMAN;NEBU-4_HUMAN;NEBU_HUMAN	NEB	Nebulin	381827	498546	293148	545075	490753
Q14511;Q14511-3	Q14511;A0A087WUD2;Q14511-3	CASL-3_HUMAN;CASL_HUMAN	NEDD9	Enhancer of filamentation 1	1927000	1891420	2072710	1944570	1639450	2020950
P07196	P07196;A0A087X0W2;A0A0S2Z436	NFL_HUMAN	NEFL	Neurofilament light polypeptide			35618.9			131836
P35240;P35240-2;P35240-3;P35240-4;P35240-5;P35240-6;P35240-8	P35240;P35240-2;P35240-3;P35240-4;P35240-5;P35240-6;P35240-8	MERL-2_HUMAN;MERL-3_HUMAN;MERL-4_HUMAN;MERL-5_HUMAN;MERL-6_HUMAN;MERL-8_HUMAN;MERL_HUMAN	NF2	Merlin			212045	569600	419645
Q8N4C6-10;Q8N4C6-7	Q8N4C6;C9J066;E9PN67;H0YDJ4;H9KV85;Q8N4C6-10;Q8N4C6-11;Q8N4C6-2;Q8N4C6-4;Q8N4C6-5;Q8N4C6-6;Q8N4C6-7;Q8N4C6-9	NIN-10_HUMAN;NIN-7_HUMAN	NIN	Isoform of Q8N4C6, Isoform 3 of Ninein	480573	595898	563250	466891	488711	560504
O43847;O43847-2	O43847;B1AKJ5;F5H7V1;G3V1R5;O43847-2	NRDC-2_HUMAN;NRDC_HUMAN	NRDC	Nardilysin	1516620	1529610	1339180	1490980	982045	1198550
Q8IVD9	Q8IVD9	NUDC3_HUMAN	NUDCD3	NudC domain-containing protein 3	1435790	1441610	1283610	1200030	1783130	1465380
Q9H4L5-2	Q9H4L5;Q9H4L5-2;Q9H4L5-3;Q9H4L5-4	OSBL3-2_HUMAN	OSBPL3	Isoform of Q9H4L5, Isoform 1b of Oxysterol-binding protein-related protein 3	1996210	2083040	2178870	2027270	1761950	1737490
O95747	O95747;Q9UEW8;C9JIG9;Q9UEW8-2	OXSR1_HUMAN	OXSR1	Serine/threonine-protein kinase OSR1	5930060	5746350	6414310	6113990	6681350	5684240
Q13153	O75914;Q13153;A0A087X294;B3KNX7;E9PM17;H0YCG5;O75914-2;O75914-3;O75914-4;Q13153-2	PAK1_HUMAN	PAK1	Serine/threonine-protein kinase PAK 1	661670	742090	525318	739360	713163	826223
Q13177	Q13177	PAK2_HUMAN	PAK2	Serine/threonine-protein kinase PAK 2	6888440	6761720	6462620	6628000	6246400	6195050
Q9HBI1;Q9HBI1-2;Q9HBI1-3	Q9HBI1;A0A087WZB5;B0QYP8;Q9HBI1-2;Q9HBI1-3	PARVB-2_HUMAN;PARVB-3_HUMAN;PARVB_HUMAN	PARVB	Beta-parvin		108104	72574.1	115311		72904.3
Q9HBI0	Q9HBI0;Q9HBI0-2;Q9HBI0-3;Q9HBI0-4;Q9HBI0-5	PARVG_HUMAN	PARVG	Gamma-parvin	3526130	3350600	3209550	3251460	2925820	3316280
Q15154;Q15154-2;Q15154-4;Q15154-5	Q15154;E7EV93;Q15154-2;Q15154-4;Q15154-5	PCM1-2_HUMAN;PCM1-4_HUMAN;PCM1-5_HUMAN;PCM1_HUMAN	PCM1	Pericentriolar material 1 protein	692476	752279	714226	873622	524032	755093
O00151	O00151	PDLI1_HUMAN	PDLIM1	PDZ and LIM domain protein 1	560000	351382	317681	428833	474034	379515
Q96JY6;Q96JY6-5	Q96JY6;A0A087WVI1;B3KPU0;Q96JY6-5	PDLI2-5_HUMAN;PDLI2_HUMAN	PDLIM2	PDZ and LIM domain protein 2	4162120	3906990	4173440	3164370	3278600	3503620
Q96HC4	Q96HC4;A0A0D9SFR4	PDLI5_HUMAN	PDLIM5	PDZ and LIM domain protein 5	1029130	873328	958424	1283200	876271	1172670
Q9NR12	Q9NR12;D6RAN1;D6RF83;D6RH06;H7BYK4;Q9NR12-2;Q9NR12-3;Q9NR12-4;Q9NR12-5;Q9NR12-6	PDLI7_HUMAN	PDLIM7	PDZ and LIM domain protein 7	2437980	1863560	2026810	2082190	2185100	2326780
P16284;P16284-2;P16284-3	P16284;A0A075B727;A0A075B728;A0A075B737;P16284-2;P16284-3;P16284-4;P16284-5;P16284-6	PECA1-2_HUMAN;PECA1-3_HUMAN;PECA1_HUMAN	PECAM1	Platelet endothelial cell adhesion molecule	195716				502110	247303
P07737	P07737;K7EJ44	PROF1_HUMAN	PFN1	Profilin-1	276023000	258897000	232453000	249025000	261031000	260110000
O75167;O75167-2;O75167-4;O75167-5	O75167;J3KP75;O75167-2;O75167-4;O75167-5	PHAR2-2_HUMAN;PHAR2-4_HUMAN;PHAR2-5_HUMAN;PHAR2_HUMAN	PHACTR2	Phosphatase and actin regulator 2	487286	459782	583912	558577	425804	380695
Q8IZ21;Q8IZ21-2;Q8IZ21-3	Q8IZ21;Q8IZ21-2;Q8IZ21-3	PHAR4-2_HUMAN;PHAR4-3_HUMAN;PHAR4_HUMAN	PHACTR4	Phosphatase and actin regulator 4	142699	199785	169528	204750	229583	196364
Q16512;Q16512-2	Q16512;K7EL10;Q16512-2	PKN1-2_HUMAN;PKN1_HUMAN	PKN1	Serine/threonine-protein kinase N1	1790300	2040660	2055410	2059360	1853380	1866970
Q15149-4	Q15149;E9PMV1;H0YDN1;Q15149-2;Q15149-3;Q15149-4;Q15149-5;Q15149-6;Q15149-7;Q15149-8;Q15149-9	PLEC-4_HUMAN	PLEC	Isoform of Q15149, Isoform 4 of Plectin	7164910	6493000	8032490	8672510	4239900	4883830
Q15149-3	Q15149-3	PLEC-3_HUMAN	PLEC	Isoform of Q15149, Isoform 3 of Plectin	999499	1035650	1193160	1236810	665999	726784
Q15149	P46783;Q15149;Q9NQ39;A0A2R8Y6L3;A0A2R8Y7H1;A0A2R8YFH6;F6U211;A0A1W2PQS6	PLEC_HUMAN	PLEC	Plectin	35146.4	34468.9	101016	194300	83146	96951.4
P08567	P08567	PLEK_HUMAN	PLEK	Pleckstrin	408388	923015	818251	1117170	305910	550481
Q9HB19	Q9HB19;A0A087WZ32;A8K727;E5RGP3;E5RHB5	PKHA2_HUMAN	PLEKHA2	Pleckstrin homology domain-containing family A member 2	802455	849343	825624	994083	1127730	1090420
Q14651	Q14651	PLSI_HUMAN	PLS1	Plastin-1		172525	269977	284418	220501	208058
O15031	O15031	PLXB2_HUMAN	PLXNB2	Plexin-B2		90590.1			149927
Q8NA72;Q8NA72-2;Q8NA72-3	Q8NA72;D6RBC1;D6RDG4;Q8NA72-2;Q8NA72-3	POC5-2_HUMAN;POC5-3_HUMAN;POC5_HUMAN	POC5	Centrosomal protein POC5			82600.9	111160	50601	81396.8
Q13136;Q13136-2	Q13136;A0A2R8Y7R9;H0YDW2;Q13136-2	LIPA1-2_HUMAN;LIPA1_HUMAN	PPFIA1	Liprin-alpha-1		178612	188745		172487
O14974-4	O14974;H0YIM2;H0YIS3;O14974-2;O14974-3;O14974-4;O14974-5	MYPT1-4_HUMAN	PPP1R12A	Isoform of O14974, Isoform 4 of Protein phosphatase 1 regulatory subunit 12A	3487590	3441600	3487810	3381450	3150630	3597020
Q9BZL4-4	Q9BZL4;K7EL81;Q9BZL4-3;Q9BZL4-4;Q9BZL4-5	PP12C-4_HUMAN	PPP1R12C	Isoform of Q9BZL4, Isoform 4 of Protein phosphatase 1 regulatory subunit 12C	746029	736404	860645	716516	755369	734022
Q6NYC8	Q6NYC8;A0A0G2JHC2;Q6NYC8-3;Q6NYC8-4	PPR18_HUMAN	PPP1R18	Phostensin	3792470	3366220	4145670	3859380	3010070	3241050
O43663	O43663;O43663-2;O43663-3;O43663-4	PRC1_HUMAN	PRC1	Protein regulator of cytokinesis 1	290453	673938	477373	609446	553164	723986
O43586	O43586;H0YKY3;H0YLW8;H0YLX8;J3KPG6;O43586-2	PPIP1_HUMAN	PSTPIP1	Proline-serine-threonine phosphatase-interacting protein 1	1998010	1692510	1832590	1800120	1793050	1831750
Q9H939	Q9H939	PPIP2_HUMAN	PSTPIP2	Proline-serine-threonine phosphatase-interacting protein 2	296273	383749	380052	287693	503309	416411
P18433;P18433-6	P18433;P18433-6	PTPRA-6_HUMAN;PTPRA_HUMAN	PTPRA	Receptor-type tyrosine-protein phosphatase alpha	138304	80192.4	245049	206487	207652	238727
P49023	P49023;A0A1B0GTU4;A0A1B0GU60;F5GZ78;F5H836;P49023-2;P49023-3	PAXI_HUMAN	PXN	Paxillin	6160180	6196580	5908380	5924860	5467740	6354080
Q9UL25	Q9UL25	RAB21_HUMAN	RAB21	Ras-related protein Rab-21	1124830	1250830	1243600	1596410	1594980	1448600
Q9H5N1;Q9H5N1-2	Q9H5N1;B4DHR0;Q9H5N1-2	RABE2-2_HUMAN;RABE2_HUMAN	RABEP2	Rab GTPase-binding effector protein 2	968117	862918	921196	991361	957459	975622
P63000;P63000-2	P63000;P63000-2	RAC1-2_HUMAN;RAC1_HUMAN	RAC1	Ras-related C3 botulinum toxin substrate 1	2645590	2502820	3464030	3115190	2707030	3093010
Q8WWW0;Q8WWW0-2	Q8WWW0;A0A075B763;A0A1B0GTG4;Q8TEK8;Q8WWW0-2;Q8WWW0-3	RASF5-2_HUMAN;RASF5_HUMAN	RASSF5	Ras association domain-containing protein 5	1723730	1509090	1539800	1559730	1569860	1549870
Q6JBY9	Q6JBY9;B7ZKW8;Q6JBY9-2	CPZIP_HUMAN	RCSD1	CapZ-interacting protein	1386110	1724130	1797750	1831720	2229330	1559830
P35241	P35241;P35241-4	RADI_HUMAN	RDX	Radixin	741372	666064	850230	827881	754266	659271
Q8N5W9	Q8N5W9	RFLB_HUMAN	RFLNB	Refilin-B	1099830	1131510	1175440	787620	851383	1071200
P61586	P08134;P61586;P62745;U3KQA9;U3KQV3;C9JNR4;C9JRM1;C9JX21;E9PLA2;E9PN11;E9PQH6;Q5JR05;Q5JR06;Q5JR07;Q5JR08	RHOA_HUMAN	RHOA	Transforming protein RhoA	14284600	13197100	16724100	16064600	14895100	16338600
P08134	P08134;E9PQH6;Q5JR08	RHOC_HUMAN	RHOC	Rho-related GTP-binding protein RhoC	1022220	973343	1262310	1461480	1357690	1403380
Q9HBH0	Q9HBH0;F5GXB1;Q9HBH0-2	RHOF_HUMAN	RHOF	Rho-related GTP-binding protein RhoF	625145	772733	946249	782831	694294	769230
P84095	P84095	RHOG_HUMAN	RHOG	Rho-related GTP-binding protein RhoG	2421870	2446960	2940190	2934670	2794550	2963440
Q9Y4F9	Q9Y4F9;A0A2R8Y7B3;A0A2R8YEE0;A0A2R8YF77;B7Z6U4;F5GX51;F5H029;Q9Y4F9-2	RIPR2_HUMAN	RIPOR2	Rho family-interacting cell polarization regulator 2	836963	981455	918535	815062	603497	874731
Q9Y4F9-2	A0A2R8Y7B3;A0A2R8YEE0;B7Z6U4;F5GX51;F5H029;Q9Y4F9-2	RIPR2-2_HUMAN	RIPOR2	Isoform of Q9Y4F9, Isoform 2 of Rho family-interacting cell polarization regulator 2	341108	484876	411117	321487		323999
A0A2R8Y7B3;A0A2R8YEE0;B7Z6U4	A0A2R8Y7B3;A0A2R8YEE0;B7Z6U4	A0A2R8Y7B3_HUMAN;A0A2R8YEE0_HUMAN;B7Z6U4_HUMAN	RIPOR2	Isoform of Q9Y4F9, Rho family-interacting cell polarization regulator 2	150616	199117	157220	174423	102974
Q96DB5	Q96DB5;E5RH53;H0YB03;H0YB83;H0YC67	RMD1_HUMAN	RMDN1	Regulator of microtubule dynamics protein 1	981794	1164860	1027920	1049450	1015480	1162250
Q96TC7	Q96TC7;H0YLG5;H0YNE5	RMD3_HUMAN	RMDN3	Regulator of microtubule dynamics protein 3	596254	558004	543176	466539	492610	506753
Q13464	Q13464;A0A0U1RQV4	ROCK1_HUMAN	ROCK1	Rho-associated protein kinase 1	1528700	1535870	2083820	1778630	2043440	1774550
O75116	O75116;E9PF63	ROCK2_HUMAN	ROCK2	Rho-associated protein kinase 2	178388	203793	319322	235904	358696	205545
Q9BVN2;Q9BVN2-2;Q9BVN2-3;Q9BVN2-4	Q9BVN2;A0A087WX95;A0A087WYB2;A0A087WZ68;Q68CX2;Q9BVN2-2;Q9BVN2-3;Q9BVN2-4	RUSC1-2_HUMAN;RUSC1-3_HUMAN;RUSC1-4_HUMAN;RUSC1_HUMAN	RUSC1	RUN and SH3 domain-containing protein 1	50399.7	55562.1		49260.9
P31949	P31949	S10AB_HUMAN	S100A11	Protein S100-A11	30698200	29644900	33488700	28377200	30755600	32324600
Q14160;Q14160-3	Q14160;A0A0G2JMS7;A0A0G2JNZ2;A0A0G2JPP5;Q14160-2;Q14160-3	SCRIB-3_HUMAN;SCRIB_HUMAN	SCRIB	Protein scribble homolog	1415460	1275720	1373710	1428620	1454530	1584460
Q8IZE3;Q8IZE3-2	Q8IZE3;Q8IZE3-2;X6RHX1	PACE1-2_HUMAN;PACE1_HUMAN	SCYL3	Protein-associating with the carboxyl-terminal domain of ezrin	333040	295753	287990	343016	233433	339247
O00560;O00560-3	O00560;B4DHN5;E9PBU7;G5EA09;O00560-2;O00560-3	SDCB1-3_HUMAN;SDCB1_HUMAN	SDCBP	Syntenin-1	1006090	1058690	892658	992004	870051	958108
O00560-2	G5EA09;O00560-2	SDCB1-2_HUMAN	SDCBP	Isoform of O00560, Isoform 2 of Syntenin-1	390091	535349	279108	455700	292142	427653
P14151;P14151-2	P14151;P14151-2	LYAM1-2_HUMAN;LYAM1_HUMAN	SELL	L-selectin	580863	836159	858656	1073350	845993	1219560
Q14242;Q14242-2	Q14242;A0A0C4DFY0;Q14242-2	SELPL-2_HUMAN;SELPL_HUMAN	SELPLG	P-selectin glycoprotein ligand 1	349789	415688	531575	569552	468273	395415
Q8WYJ6	Q8WYJ6;J3KNL2	SEPT1_HUMAN	SEPT1	Septin-1	13154800	12951300	11088300	12044500	13330200	11787300
Q9NVA2;Q9NVA2-2	Q9NVA2;D6R9Y6;D6RDP1;D6RDU5;D6RER5;D6RGI3;Q9NVA2-2	SEP11-2_HUMAN;SEP11_HUMAN	SEPT11	Septin-11	734980	870967	979020	912298	932346	841249
Q15019;Q15019-2	Q15019;B5MCX3;C9IY94;C9J2Q4;C9J938;C9JB25;H7C310;Q15019-2;Q15019-3	SEPT2-2_HUMAN;SEPT2_HUMAN	SEPT2	Septin-2	7460760	7012250	7301980	6088630	6756070	7410340
Q14141;Q14141-2;Q14141-4	Q14141;Q92599;Q9NVA2;A0A087X142;A6NFQ9;A6NMH6;B1AMS2;D6RDU5;D6RER5;D6RGI3;F8W8I8;H0Y961;Q14141-2;Q14141-4;Q92599-2;Q92599-3;Q92599-4;Q9NVA2-2	SEPT6-2_HUMAN;SEPT6-4_HUMAN;SEPT6_HUMAN	SEPT6	Septin-6	12532400	12171600	10765300	10535600	12872300	12041200
Q16181	Q16181;A0A0U1RRE1;A0A0U1RRH9;E7EPK1;E7ES33;G3V1Q4;Q16181-2	SEPT7_HUMAN	SEPT7	Septin-7	6297320	6001180	6263090	5728700	6790940	6102240
Q92599;Q92599-2;Q92599-4	Q92599;A0A087X142;A6NFQ9;A6NMH6;C9J4G8;C9JV02;F8W8I8;Q92599-2;Q92599-3;Q92599-4	SEPT8-2_HUMAN;SEPT8-4_HUMAN;SEPT8_HUMAN	SEPT8	Septin-8	530594	746094	829612	829414	536334	723307
Q9UHD8;Q9UHD8-2;Q9UHD8-5;Q9UHD8-7	Q9UHD8;K7EIE4;K7EK18;K7EL40;K7EQD7;K7ER52;Q9UHD8-2;Q9UHD8-3;Q9UHD8-4;Q9UHD8-5;Q9UHD8-7;Q9UHD8-8;Q9UHD8-9	SEPT9-2_HUMAN;SEPT9-5_HUMAN;SEPT9-7_HUMAN;SEPT9_HUMAN	SEPT9	Septin-9	10906400	10965000	11592700	10741100	12122600	10853300
P30740	P30740	ILEU_HUMAN	SERPINB1	Leukocyte elastase inhibitor	4452560	4677610	5277300	4391620	4869460	5254170
P50452	P50452;P50452-3	SPB8_HUMAN	SERPINB8	Serpin B8	581821	595343	488292	746373	399836	545404
P50453	P50453	SPB9_HUMAN	SERPINB9	Serpin B9	9427890	8524020	9300670	8155410	9688270	8217620
Q86TU7	Q86TU7	SETD3_HUMAN	SETD3	Actin-histidine N-methyltransferase	1002390	1244290	1210460	1264600	1102030	1097390
Q8N5H7	Q8N5H7;Q5JU32;Q8N5H7-2;Q8N5H7-4;Q8N5H7-5;Q8N5H7-6	SH2D3_HUMAN	SH2D3C	SH2 domain-containing protein 3C	536359	478068	528611	495945	378088	476217
Q9Y3L3	Q6ZT62;Q9Y3L3;Q6ZT62-2;Q9Y3L3-2	3BP1_HUMAN	SH3BP1	SH3 domain-binding protein 1	3521490	3544800	4394760	3694510	4401420	4034460
Q96B97-2	Q96B97;Q5JPT2;Q5VSN0;Q96B97-2;Q96B97-3	SH3K1-2_HUMAN	SH3KBP1	Isoform of Q96B97, Isoform 2 of SH3 domain-containing kinase-binding protein 1	3798930	4138280	4979210	4347940	3879950	4036750
Q9H0F6;Q9H0F6-2	Q9H0F6;Q9H0F6-2	SHRPN-2_HUMAN;SHRPN_HUMAN	SHARPIN	Sharpin	734201	710791	622282	641737	655418	798112
Q86WV1;Q86WV1-2	Q86WV1;J3QRG3;Q86WV1-2	SKAP1-2_HUMAN;SKAP1_HUMAN	SKAP1	Src kinase-associated phosphoprotein 1	3530490	3688490	3157780	2827570	3291250	3342550
O75563	O75563	SKAP2_HUMAN	SKAP2	Src kinase-associated phosphoprotein 2	477856	406585	446921	745583	682878	665771
Q9H6Q3;Q9H6Q3-3	Q9H6Q3;Q9H6Q3-2;Q9H6Q3-3;Q9H6Q3-4	SLAP2-3_HUMAN;SLAP2_HUMAN	SLA2	Src-like-adapter 2	1315350	1385190	1114920	1373640	1691210	1568970
Q9P270	Q9P270;D6RIF6;H0Y9L2	SLAI2_HUMAN	SLAIN2	SLAIN motif-containing protein 2	991653	1027030	1256310	1259780	1107950	1073490
Q9H2G2;Q9H2G2-2	Q9H2G2;Q9H2G2-2	SLK-2_HUMAN;SLK_HUMAN	SLK	STE20-like serine/threonine-protein kinase	1121860	1158580	1414630	1199610	1374280	1127360
Q13884	Q13884;A0A3B3ITC2;Q13884-2	SNTB1_HUMAN	SNTB1	Beta-1-syntrophin	921688	946030	823733	707654	892981	909825
Q9Y5X1	Q9Y5X1	SNX9_HUMAN	SNX9	Sorting nexin-9	1723080	1527370	1630650	2037170	1497390	1832150
O60504;O60504-2	O60504;E5RJP2;H0YAZ3;H0YB51;O60504-2	VINEX-2_HUMAN;VINEX_HUMAN	SORBS3	Vinexin	1584320	1660100	1687190	1279080	1061750	1414180
Q8N0X7	Q8N0X7	SPART_HUMAN	SPART	Spartin	381261	388429	392813	373998	343261	364916
Q96N96;Q96N96-2;Q96N96-3;Q96N96-6	O43307;Q96N96;Q9NR80;A0A087X0P1;A0A0A6YYB3;A0A0A6YYF8;A0A0C4DFY6;A0A1B0GTC2;A0A1B0GTF0;A0A1B0GV82;A0A1B0GV84;A0A1B0GVC4;A0A1B0GVV2;A0A1B0GWI5;B1AMR3;B1AMR4;E7EV07;E9PEM0;E9PFR9;H0YCT6;J3KQJ8;O43307-2;O43307-3;Q96N96-2;Q96N96-3;Q96N96-4;Q96N96-5;Q96N96-6;Q9NR80-3;Q9NR80-4;A0A0A0MRY4	SPT13-2_HUMAN;SPT13-3_HUMAN;SPT13-6_HUMAN;SPT13_HUMAN	SPATA13	Spermatogenesis-associated protein 13	893987	1039850	1073240	900406	891040	1077230
Q8NCJ5	Q8NCJ5;F8VWW7	SPRY3_HUMAN	SPRYD3	SPRY domain-containing protein 3	379271	316426	459677	345131	279491	383873
Q13813	Q13813;A0A0D9SF54;A0A0D9SGF6;Q13813-2;Q13813-3	SPTN1_HUMAN	SPTAN1	Spectrin alpha chain, non-erythrocytic 1	5600680	5780320	4939570	4482030	5506780	4952640
Q13813-2	A0A0D9SF54;A0A0D9SGF6;Q13813-2	SPTN1-2_HUMAN	SPTAN1	Isoform of Q13813, Isoform 2 of Spectrin alpha chain, non-erythrocytic 1	216716	229684	197860	170243	371625	340440
Q01082	Q01082;A0A087WUZ3;Q01082-2;Q01082-3	SPTB2_HUMAN	SPTBN1	Spectrin beta chain, non-erythrocytic 1	30098100	31987400	28253200	25509900	29049400	27636100
Q01082-3	Q01082-3	SPTB2-3_HUMAN	SPTBN1	Isoform of Q01082, Isoform 2 of Spectrin beta chain, non-erythrocytic 1	548922	405825	589448	397222	573769	555147
Q8TE77;Q8TE77-3	Q8TE77;A0A087WWG1;E9PIT5;Q8TE77-2;Q8TE77-3	SSH3-3_HUMAN;SSH3_HUMAN	SSH3	Protein phosphatase Slingshot homolog 3	844654	787889	904999	899270	850850	899349
P16949	P16949;A2A2D0;P16949-2	STMN1_HUMAN	STMN1	Stathmin	30723800	32996800	24992900	27315500	41224700	24168500
Q5VSL9	Q5VSL9;Q9ULQ0;Q5VSL9-2;Q5VSL9-3;Q9ULQ0-2	STRP1_HUMAN	STRIP1	Striatin-interacting protein 1	922854	937417	1013290	793986	804996	915525
Q9UH99;Q9UH99-2	Q9UH99;B0QY60;Q9UH99-2;Q9UH99-3	SUN2-2_HUMAN;SUN2_HUMAN	SUN2	SUN domain-containing protein 2	1126800	799579	1216320	1472730	1895650	1197240
Q9UH65	Q9UH65;E7EMB1;E9PJM7	SWP70_HUMAN	SWAP70	Switch-associated protein 70		327118	358230	308162	391929	225151
Q8WXH0;Q8WXH0-2	Q8WXH0;A0A0A0MRE3;A0A0C4DGK3;G3V5X4;Q8WXH0-2;Q8WXH0-7	SYNE2-2_HUMAN;SYNE2_HUMAN	SYNE2	Nesprin-2	813494	850092	907587	973185	911269	917730
Q6ZMZ3;Q6ZMZ3-2	Q6ZMZ3;G3V533;Q6ZMZ3-2	SYNE3-2_HUMAN;SYNE3_HUMAN	SYNE3	Nesprin-3	237992		253061	348659	376367	214935
O75347	O75347;E5RHG6;E5RIW3;E5RJD8;O75347-2	TBCA_HUMAN	TBCA	Tubulin-specific chaperone A	8001040	9258140	9307900	8486550	7772000	6858800
Q99426	Q99426;A0A494C0X0;K7EK42;K7EP07;Q99426-2	TBCB_HUMAN	TBCB	Tubulin-folding cofactor B	6225670	6604670	6533430	6498700	5764520	6804000
Q15814	Q15814	TBCC_HUMAN	TBCC	Tubulin-specific chaperone C	1161360	1095120	1301040	1208000	1140820	1261140
Q9BTW9-4	Q9BTW9;A0A0J9YVR1;A0A0J9YWI5;J3KR97;Q9BTW9-2;Q9BTW9-4	TBCD-4_HUMAN	TBCD	Isoform of Q9BTW9, Isoform 4 of Tubulin-specific chaperone D	1648280	1924920	1867340	1631180	1878720	1492000
Q15813	Q15813;A0A2R8Y6Q1;A0A2R8YHI9;A0A2U3TZJ6;Q15813-2	TBCE_HUMAN	TBCE	Tubulin-specific chaperone E	840259	852572	830269	886666	1025570	843163
Q5QJ74	A0A2R8YFB7;Q5QJ74;E9PP54	TBCEL_HUMAN	TBCEL	Tubulin-specific chaperone cofactor E-like protein	186392	344170	245981	304910	316852	392748
Q9UGI8	Q9UGI8;Q9UGI8-2	TES_HUMAN	TES	Testin	8826140	8308210	7637570	6538520	6930990	7310280
P07996	P07996;P07996-2	TSP1_HUMAN	THBS1	Thrombospondin-1		1766120		1789570	1331480	2371070
Q13009;Q13009-2	Q13009;A0A1B0GW57;H7C079;Q13009-2	TIAM1-2_HUMAN;TIAM1_HUMAN	TIAM1	T-lymphoma invasion and metastasis-inducing protein 1		106446	84658.3
Q9Y490	Q9Y490	TLN1_HUMAN	TLN1	Talin-1	10722700	10731800	13473400	10773700	11782700	10458000
Q9NZR1	Q9NZR1;G5EA42;H0YMA2;Q9NZR1-2	TMOD2_HUMAN	TMOD2	Tropomodulin-2		63137.7		123617		76056.1
Q9NYL9	Q9NYL9;H0YNU8	TMOD3_HUMAN	TMOD3	Tropomodulin-3	6993040	7036070	6593910	6794990	7571940	6803800
P63313	P63313	TYB10_HUMAN	TMSB10	Thymosin beta-10	2907350	3474320	3631880	3965670	3238790	3112290
Q9HBL0	Q9HBL0;A0A087WWW7;A0A2R8Y4T1;A0A494C067;E9PF55;E9PGF5;H0Y4U1	TENS1_HUMAN	TNS1	Tensin-1	119399				105128
Q9Y4F4	Q9Y4F4;G3XAE9;Q9Y4F4-2;Q9Y4F4-3	TGRM1_HUMAN	TOGARAM1	TOG array regulator of axonemal microtubules protein 1	381925	349364	339835	437639	468509	477955
P09493-5	A0A494BZZ2;B7Z596;F5H7S3;H0YK48;H0YKJ4;H0YN06;H7BYY1;P09493-5	TPM1-5_HUMAN	TPM1	Isoform of P09493, Isoform 5 of Tropomyosin alpha-1 chain	209757	240679	198218	159656	268720	348937
P06753-2	A0A087WWU8;J3KN67;P06753-2;P06753-5;P06753-7;Q5HYB6	TPM3-2_HUMAN	TPM3	Isoform of P06753, Isoform 2 of Tropomyosin alpha-3 chain	31878900	33599900	35555100	36621600	35692900	32260600
P06753	P06753;A0A2R8Y5V9;A0A2R8YH90;A0A494C034;P06753-6	TPM3_HUMAN	TPM3	Tropomyosin alpha-3 chain	914746	897671	820756	867060	961185	1147820
P67936	P67936;A0A2R8YE05;K7ENT6;K7EPB9;P67936-2	TPM4_HUMAN	TPM4	Tropomyosin alpha-4 chain	16737200	14304800	17040600	17740000	18017100	16834200
Q15642;Q15642-2	Q15642;M0R2H7;Q15642-2;Q15642-3;Q15642-4;Q15642-5;W4VSQ9	CIP4-2_HUMAN;CIP4_HUMAN	TRIP10	Cdc42-interacting protein 4	538645	618496	898357	632529	757377	505211
Q15654	Q15654;H7BZE2	TRIP6_HUMAN	TRIP6	Thyroid receptor-interacting protein 6	192111	151346	200350	121901	194519	180604
Q14166	Q14166	TTL12_HUMAN	TTLL12	Tubulin--tyrosine ligase-like protein 12	2732650	2220880	2475370	2666580	2158420	2131200
Q6ZT98	Q6ZT98	TTLL7_HUMAN	TTLL7	Tubulin polyglutamylase TTLL7	136945	117902		222129	145677	135374
Q71U36;Q71U36-2	P0DPH7;P0DPH8;Q6PEY2;Q71U36;F8VQQ4;P0DPH7-2;Q71U36-2	TBA1A-2_HUMAN;TBA1A_HUMAN	TUBA1A	Tubulin alpha-1A chain	3692100	4000590	4524630	4787170	5381630	5307180
Q9BQE3	P0DPH7;P0DPH8;Q6PEY2;Q71U36;Q9BQE3;Q9NY65;A0A1W2PQM2;C9J2C0;F5H5D3;P0DPH7-2;Q71U36-2;Q9NY65-2;V9GZ17	TBA1C_HUMAN	TUBA1C	Tubulin alpha-1C chain	109296000	115281000	111633000	118792000	128061000	108354000
P68366;P68366-2	A6NHL2;P68363;P68366;Q71U36;Q9BQE3;A0A1W2PQM2;A6NHL2-2;F5H5D3;P68363-2;P68366-2;Q71U36-2	TBA4A-2_HUMAN;TBA4A_HUMAN	TUBA4A	Tubulin alpha-4A chain	104419000	106069000	99912900	109432000	119821000	104156000
A6NHL2;A6NHL2-2	A6NHL2;A6NHL2-2	TBAL3-2_HUMAN;TBAL3_HUMAN	TUBAL3	Tubulin alpha chain-like 3	755561	700957	1224520	606924	684919	604852
P07437	P07437;Q5JP53;Q5ST81	TBB5_HUMAN	TUBB	Tubulin beta chain	111817000	120970000	113446000	123266000	140761000	114905000
Q9H4B7	Q9H4B7	TBB1_HUMAN	TUBB1	Tubulin beta-1 chain				318861
Q13885	Q13885;Q9BVA1	TBB2A_HUMAN	TUBB2A	Tubulin beta-2A chain	454835	683672	841386	698245	232412	1066590
Q13509-2	Q13509;Q13509-2;A0A0B4J269	TBB3-2_HUMAN	TUBB3	Isoform of Q13509, Isoform 2 of Tubulin beta-3 chain	1304620	1129130	1336340	1345020	1551740	1419410
P04350	P04350	TBB4A_HUMAN	TUBB4A	Tubulin beta-4A chain	1075230	1288520	921150	1143030	1298370	1159500
P68371	P04350;P07437;P68371;Q5JP53;Q5ST81	TBB4B_HUMAN	TUBB4B	Tubulin beta-4B chain	92096200	93362200	82319500	92855300	108869000	91778500
P68371	P04350;P07437;P68371;Q5JP53;Q5ST81	TBB4B_HUMAN	TUBB4B	Tubulin beta-4B chain	92096200	93362200	82319500	92855300	108869000	91778500
Q9BUF5	Q13509;Q9BUF5;K7ESM5;Q13509-2;A0A0B4J269	TBB6_HUMAN	TUBB6	Tubulin beta-6 chain	2754520	4048820	3378550	4603840	8053290	4525330
Q3ZCM7	A6NNZ2;Q3ZCM7;A0A075B736;Q5SQY0	TBB8_HUMAN	TUBB8	Tubulin beta-8 chain		342139	510283	256888	410409	435194
P23258	P23258	TBG1_HUMAN	TUBG1	Tubulin gamma-1 chain	2762530	2899840	2884660	3108370	3198600	2558980
Q9BSJ2;Q9BSJ2-4	Q9BSJ2;B3KTU7;F2Z2B9;Q9BSJ2-3;Q9BSJ2-4	GCP2-4_HUMAN;GCP2_HUMAN	TUBGCP2	Gamma-tubulin complex component 2	1772640	1782630	1831580	1768450	1633090	1490670
Q96CW5;Q96CW5-2	Q96CW5;A0A3B3ITE3;Q96CW5-2	GCP3-2_HUMAN;GCP3_HUMAN	TUBGCP3	Gamma-tubulin complex component 3	1258890	1265420	1398310	1424860	1327660	1184280
Q96RT8;Q96RT8-2	Q96RT8;A0A087WVL9;A0A087WVZ8;A0A087X1Z1;A0A0G2JPW5;A0A0G2JQK2;A0A0G2JQX1;A0A0G2JS51;A0A0G2JSA7;Q96RT8-2	GCP5-2_HUMAN;GCP5_HUMAN	TUBGCP5	Gamma-tubulin complex component 5	118643	225094	263246	158425	232814	165086
Q96RT7;Q96RT7-2;Q96RT7-3	Q96RT7;E7EQL8;Q96RT7-2;Q96RT7-3	GCP6-2_HUMAN;GCP6-3_HUMAN;GCP6_HUMAN	TUBGCP6	Gamma-tubulin complex component 6		212502	181151	178634	178232	119630
Q12792	Q12792;F8VS81;F8W1Q9;Q12792-3	TWF1_HUMAN	TWF1	Twinfilin-1	812802	672027	844871	674342	457158	478121
P50552	P50552	VASP_HUMAN	VASP	Vasodilator-stimulated phosphoprotein	6963800	6154470	6551520	7112120	6620430	6544860
P15498	P15498;A0A0A0MR07;F5H5P4;Q96D37	VAV_HUMAN	VAV1	Proto-oncogene vav	2267790	2565070	2944490	2493750	2235650	2065190
E9PMJ5	E9PMJ5	E9PMJ5_HUMAN	VAV3	Isoform of Q9UKW4, Guanine nucleotide exchange factor VAV3	2611920	2483470	2635080	2849590	2541050	2488630
P18206;P18206-2	P18206;P18206-2	VINC-2_HUMAN;VINC_HUMAN	VCL	Vinculin	4322200	3499600	3884720	2963550	2885370	3147940
P08670	P08670;B0YJC4	VIME_HUMAN	VIM	Vimentin	193976000	183117000	246699000	184185000	182810000	203024000
P04004	P04004	VTNC_HUMAN	VTN	Vitronectin		286998	2139980	20508400	7236130	15259300
P42768	P42768	WASP_HUMAN	WAS	Wiskott-Aldrich syndrome protein	6678040	6191570	6515650	6355760	6010550	5970320
Q9Y6W5	Q9Y6W5;Q9Y6W5-2	WASF2_HUMAN	WASF2	Wiskott-Aldrich syndrome protein family member 2	5654400	4977660	5132750	4643140	5223840	5180590
C4AMC7;Q6VEQ5	A8K0Z3;A8MWX3;C4AMC7;Q6VEQ5;Q9NQA3	WASH2_HUMAN;WASH3_HUMAN	WASH2P;WASH3P	Putative WAS protein family homolog 3	344715	296217	484285	517372	575683	479040
Q641Q2;Q641Q2-2	Q641Q2;Q9Y4E1;A0A087WYF6;A0A096LPC5;A0A0A0MR88;A0A0A0MT65;E7ESD2;F8W7U3;J3KP36;Q641Q2-2;Q9Y4E1-1;Q9Y4E1-2;Q9Y4E1-3;Q9Y4E1-5;Q9Y4E1-6	WAC2A-2_HUMAN;WAC2A_HUMAN	WASHC2A	WASH complex subunit 2A	950901	1010090	982534	974057	923019	931708
Q9Y3C0	Q9Y3C0;F5GWI9;F5GXZ4;F5GXZ7;F5GZ97;F5H0A7;F5H2P1	WASC3_HUMAN	WASHC3	WASH complex subunit 3	1472570	1349080	1336730	1384400	1249480	1284400
Q2M389	Q2M389;A0A087X256	WASC4_HUMAN	WASHC4	WASH complex subunit 4	1149160	1274370	1312880	1071680	1091930	950736
O75083	O75083;O75083-3	WDR1_HUMAN	WDR1	WD repeat-containing protein 1	20548700	28975100	27854400	27136500	24809500	29176600
O43516;O43516-3	O43516;E9PB87;O43516-2;O43516-3;O43516-4	WIPF1-3_HUMAN;WIPF1_HUMAN	WIPF1	WAS/WASL-interacting protein family member 1	9055110	7610780	7471180	9668160	9148230	9015370
Q96QU8;Q96QU8-2	Q96QU8;I3L2K0;Q96QU8-2	XPO6-2_HUMAN;XPO6_HUMAN	XPO6	Exportin-6	531031	606223	565374	500947	425573	520060
O43670;O43670-2;O43670-4	O43670;J3QRS9;O43670-2;O43670-3;O43670-4	ZN207-2_HUMAN;ZN207-4_HUMAN;ZN207_HUMAN	ZNF207	BUB3-interacting and GLEBS motif-containing protein ZNF207	4058770	4114160	3448140	4353170	3916930	4155640
Q15942	Q15942;H0Y2Y8;Q15942-2	ZYX_HUMAN	ZYX	Zyxin	7492680	7262120	6695290	7813700	6628170	7279520

## Sheet: Metabolism
Protein Group	Protein Ids	Protein Names	Genes	First Protein Description	Donor 1	Donor 2	Donor 3	Donor 4	Donor 5	Donor 6
GLYCOLYSIS
Q9BRR6;Q9BRR6-2	Q9BRR6;H3BRS6;H3BU35;Q9BRR6-2;Q9BRR6-5	ADPGK-2_HUMAN;ADPGK_HUMAN	ADPGK	ADP-dependent glucokinase	1056290	1490420	1520990	1540180	1523220	1444220
P04075	P04075;H3BR68;J3KPS3;P04075-2	ALDOA_HUMAN	ALDOA	Fructose-bisphosphate aldolase A	63538800	57559100	46904900	55217600	70713100	60875200
P09972	P09972;A8MVZ9	ALDOC_HUMAN	ALDOC	Fructose-bisphosphate aldolase C	13622700	13412800	9221080	15311900	21296600	17201600
P07738	P07738	PMGE_HUMAN	BPGM	Bisphosphoglycerate mutase	992477	917169	957510	1316100	913947	937230
P06733	P06733;A0A2R8Y6G6;P06733-2	ENOA_HUMAN	ENO1	Alpha-enolase	210389000	165043000	171138000	211379000	246336000	222430000
P09104	P09104;F5H0C8;P09104-2;U3KQP4	ENOG_HUMAN	ENO2	Gamma-enolase	7062600	7030450	9841620	9548590	11608000	10374600
P09467	O00757;P09467;A0A3B3IUC7	F16P1_HUMAN	FBP1	Fructose-1,6-bisphosphatase 1	349425	763313	483041	509136	538777	622330
P11413;P11413-2;P11413-3	P11413;P11413-2;P11413-3	G6PD-2_HUMAN;G6PD-3_HUMAN;G6PD_HUMAN	G6PD	Glucose-6-phosphate 1-dehydrogenase	8442590	8640240	8675590	8215110	8674030	8003190
P04406	P04406;E7EUT5;P04406-2	G3P_HUMAN	GAPDH	Glyceraldehyde-3-phosphate dehydrogenase	255245000	211405000	224985000	235873000	263877000	249113000
P06744	P06744;A0A0A0MTS2;A0A0J9YX90;A0A0J9YXP8;A0A0J9YYH3;A0A2R8Y6C7;A0A2U3TZU2;K7ENA0;K7EPY4;K7EQ48;P06744-2	G6PI_HUMAN	GPI	Glucose-6-phosphate isomerase	30675200	25942000	26256700	31019600	48603800	31569800
O95479	O95479;R4GMU1	G6PE_HUMAN	H6PD	GDH/6PGL endoplasmic bifunctional protein	306984	443848	751630	433362	710841	474657
P19367;P19367-2;P19367-3;P19367-4	P19367;P19367-2;P19367-3;P19367-4	HXK1-2_HUMAN;HXK1-3_HUMAN;HXK1-4_HUMAN;HXK1_HUMAN	HK1	Hexokinase-1	9240160	9914280	13028200	10749900	11519200	10355900
P52789	P52789;E9PB90	HXK2_HUMAN	HK2	Hexokinase-2	1516100	1241460	1216990	1910260	2014510	1550080
P00338;P00338-3	P00338;P00338-3;P00338-4	LDHA-3_HUMAN;LDHA_HUMAN	LDHA	L-lactate dehydrogenase A chain	63541800	58142100	56695700	62022900	75933100	60308200
Q9BYZ2	Q9BYZ2	LDH6B_HUMAN	LDHAL6B	L-lactate dehydrogenase A-like 6B	1899750	1827320	2227850	2594620	3998490	3135330
P07195	P07195;A8MW50;C9J7H8;F5H793;A0A3B3IS95	LDHB_HUMAN	LDHB	L-lactate dehydrogenase B chain	48501700	52806700	44802100	41725500	44127300	45703000
Q16875;Q16875-2;Q16875-3;Q16875-4	Q16875;A0A1W2PR17;F2Z2I2;Q16875-2;Q16875-3;Q16875-4;Q5VX20;Q5W015	F263-2_HUMAN;F263-3_HUMAN;F263-4_HUMAN;F263_HUMAN	PFKFB3	6-phosphofructo-2-kinase/fructose-2,6-bisphosphatase 3	350901	324232	392751	537314	453115	438643
P17858-2	P08237;P17858;A0A2R8Y891;P08237-3;P17858-2	PFKAL-2_HUMAN	PFKL	Isoform of P17858, Isoform 2 of ATP-dependent 6-phosphofructokinase, liver type	2759860	3532290	3493370	3372160	3469330	3072440
P08237;P08237-3	P08237;A0A2R8Y891;F8VNX2;F8VSF7;F8VSL1;F8VTQ3;F8VUB8;F8VW30;F8VX13;F8VYK8;F8VZI0;F8VZQ1;F8W1J8;P08237-2;P08237-3	PFKAM-3_HUMAN;PFKAM_HUMAN	PFKM	ATP-dependent 6-phosphofructokinase, muscle type	428832	612753	686356	606812	662149	501492
Q01813	Q01813;B1APP6;H0Y3Y3;Q01813-2	PFKAP_HUMAN	PFKP	ATP-dependent 6-phosphofructokinase, platelet type	5015170	4514380	5803780	3638280	6766170	5651500
P18669	P18669	PGAM1_HUMAN	PGAM1	Phosphoglycerate mutase 1	29878500	28903900	25314000	33542000	36173400	34740700
P00558	P00558;P00558-2	PGK1_HUMAN	PGK1	Phosphoglycerate kinase 1	66610600	53875900	52665500	60594700	87576300	76900900
P07205	P07205	PGK2_HUMAN	PGK2	Phosphoglycerate kinase 2	194512	208349	274114	327052	652448	519972
P36871	P36871;A0A3B3ITK7;P36871-2;P36871-3	PGM1_HUMAN	PGM1	Phosphoglucomutase-1	2997150	3289080	3404710	2715100	4090560	3473910
Q96G03	Q96G03	PGM2_HUMAN	PGM2	Phosphoglucomutase-2	4040610	4126890	4475300	3829170	4163920	4467980
Q6PCE3	Q6PCE3	PGM2L_HUMAN	PGM2L1	Glucose 1,6-bisphosphate synthase	712014	799998	874398	678440	737685	792281
O95394;O95394-3;O95394-4	O95394;A0A087WT27;A0A494C0G1;A0A494C1E2;A0A494C1Q4;H0Y8I3;H0Y987;J3KN95;O95394-3;O95394-4	AGM1-3_HUMAN;AGM1-4_HUMAN;AGM1_HUMAN	PGM3	Phosphoacetylglucosamine mutase	376361	378107	268137	323532	270393	395378
P14618	P14618;B4DNK4;H3BQ34;H3BTN5;P14618-2;P14618-3	KPYM_HUMAN	PKM	Pyruvate kinase PKM	49415200	48708500	57246200	60375000	70570900	60408300
P14618-2	H3BR70;H3BTN5;P14618-2	KPYM-2_HUMAN	PKM	Isoform of P14618, Isoform M1 of Pyruvate kinase PKM	2070580	2153260	2698870	2744320	3094810	3133620
Q9NQ88	Q9NQ88;A0A0U1RQD1	TIGAR_HUMAN	TIGAR	Fructose-2,6-bisphosphatase TIGAR	3294540	2941300	3355770	2918160	2784620	2628020
P60174;P60174-1	P60174;P60174-1;P60174-4;U3KPZ0;U3KQF3	TPIS-1_HUMAN;TPIS_HUMAN	TPI1	Triosephosphate isomerase	82459000	72314700	69309700	77841900	97404500	88336900
PENTOSE PHOSPHATE PATHWAY
Q7Z4W1	Q7Z4W1;J3KS22;J3QL34;J3QRQ2;J3QS36	DCXR_HUMAN	DCXR	L-xylulose reductase	3499940	3204330	3166630	2667260	3034990	3939060
P52209;P52209-2	P52209;K7EM49;K7EMN2;K7EPF6;P52209-2	6PGD-2_HUMAN;6PGD_HUMAN	PGD	6-phosphogluconate dehydrogenase, decarboxylating	3779870	4056450	3553160	3020910	4187850	3139330
O95336	M0R0U3;O95336;M0R1L2;M0R261	6PGL_HUMAN	PGLS	6-phosphogluconolactonase	9503250	10164100	9002240	9379930	10136200	10865800
P60891	P11908;P21108;P60891;A0A0B4J207;A0A2R8Y7H4;B1ALA9;B7ZB02;H7C540;P11908-2;P60891-2	PRPS1_HUMAN	PRPS1	Ribose-phosphate pyrophosphokinase 1	10387400	11097200	8911790	9693350	10260700	11877800
Q14558-2	Q14558;Q14558-2	KPRA-2_HUMAN	PRPSAP1	Isoform of Q14558, Isoform 2 of Phosphoribosyl pyrophosphate synthase-associated protein 1	1365880	1648870	1561410	1539750	1696680	1569840
O60256	O60256;C9JDH0;C9JDU5;C9JJS3;C9K0K7;E7EPA1;E7EW35;I3L164;I3L331;O60256-3	KPRB_HUMAN	PRPSAP2	Phosphoribosyl pyrophosphate synthase-associated protein 2	1429180	1536450	1549970	1762210	1784650	1822900
Q9H477;Q9H477-2	Q9H477;Q9H477-2	RBSK-2_HUMAN;RBSK_HUMAN	RBKS	Ribokinase	1058520	1210370	952708	1102890	1088940	1246070
Q96AT9;Q96AT9-2	Q96AT9;C9IYE8;C9IZU8;C9J6A7;C9J8S0;C9J9T0;E7ESZ6;Q96AT9-2;Q96AT9-3;Q96AT9-5	RPE-2_HUMAN;RPE_HUMAN	RPE	Ribulose-phosphate 3-epimerase	839667	819542	775007	840283	1136750	859482
P49247	P49247	RPIA_HUMAN	RPIA	Ribose-5-phosphate isomerase	1412530	1841900	1293890	1417550	1636330	1642340
P37837	P37837	TALDO_HUMAN	TALDO1	Transaldolase	28700300	28823500	26542300	23378300	24049300	29249200
P29401	P29401;E9PFF2	TKT_HUMAN	TKT	Transketolase	22250100	19390100	20455000	17680800	20625100	20649300
REDOX METABOLISM
P09110	P09110;C9JDE9;H0Y4D4;H7C131;P09110-2	THIK_HUMAN	ACAA1	3-ketoacyl-CoA thiolase, peroxisomal	1263590	1051010	1081720	1009330	946816	809853
P21399	P21399	ACOC_HUMAN	ACO1	Cytoplasmic aconitate hydratase	1584330	1468230	1291610	1310510	1590670	1567230
Q99798	Q99798;A2A274	ACON_HUMAN	ACO2	Aconitate hydratase, mitochondrial	6449640	5907690	6186770	6308190	6139470	7110910
Q9NUB1;Q9NUB1-2	Q9NUB1;Q9NUB1-2;Q9NUB1-3	ACS2L-2_HUMAN;ACS2L_HUMAN	ACSS1	Acetyl-coenzyme A synthetase 2-like, mitochondrial	1864730	1949090	1532990	1744330	2305980	1279620
P51649;P51649-2	P51649;C9J8Q5;P51649-2	SSDH-2_HUMAN;SSDH_HUMAN	ALDH5A1	Succinate-semialdehyde dehydrogenase, mitochondrial	677594	809778	712201	712832	747071	1177370
Q9H8Y5	Q9H8Y5;B8ZZS4	ANKZ1_HUMAN	ANKZF1	Ankyrin repeat and zinc finger domain-containing protein 1	737672	616968	643195	842911	926297	909655
P27540;P27540-2;P27540-3;P27540-4	P27540;P27540-2;P27540-3;P27540-4	ARNT-2_HUMAN;ARNT-3_HUMAN;ARNT-4_HUMAN;ARNT_HUMAN	ARNT	Aryl hydrocarbon receptor nuclear translocator	167336	191561	211141	156816	220516	183318
P04040	P04040	CATA_HUMAN	CAT	Catalase	3232160	4564730	4215300	3051270	3679380	3702180
O14618	O14618;E9PP76;J3KNF4	CCS_HUMAN	CCS	Copper chaperone for superoxide dismutase	2828040	2949890	2859950	3101290	3372280	3018890
Q9H6Q4;Q9H6Q4-3	Q9H6Q4;H3BSH2;H3BSJ7;I3L2A3;Q9H6Q4-3	CIAO3-3_HUMAN;CIAO3_HUMAN	CIAO3	Cytosolic iron-sulfur assembly component 3	741863	698845	838760	614455	597802	554316
Q9NZ45	Q9NZ45	CISD1_HUMAN	CISD1	CDGSH iron-sulfur domain-containing protein 1	505123	519928	530400	578253	534395	567241
Q8N0X4	Q8N0X4;Q5JVC0;Q8N0X4-2	CLYBL_HUMAN	CLYBL	Citramalyl-CoA lyase, mitochondrial	585521	640851	499541	518565	521522	459892
O75390	O75390;A0A0C4DGI3;B4DJV2;H0YIC4	CISY_HUMAN	CS	Citrate synthase, mitochondrial	10205900	9338590	11232800	10035000	8797400	9803200
Q9BTZ2	P0CG22;Q9BTZ2;H0YNP7;Q9BTZ2-4;Q9BTZ2-8	DHRS4_HUMAN	DHRS4	Dehydrogenase/reductase SDR family member 4	1351680	1444540	1266250	1180880	1523320	1349830
P10515	P10515;E9PEJ4;H0YDD4	ODP2_HUMAN	DLAT	Dihydrolipoyllysine-residue acetyltransferase component of pyruvate dehydrogenase complex, mitochondrial	5285450	5200740	4947400	4852870	4771510	5579660
P36957	P36957;P36957-2	ODO2_HUMAN	DLST	Dihydrolipoyllysine-residue succinyltransferase component of 2-oxoglutarate dehydrogenase complex, mitochondrial	5465480	5355750	6631110	7009390	6985220	7347270
Q9GZT9	Q9GZT9;Q9GZT9-2;Q9GZT9-3	EGLN1_HUMAN	EGLN1	Egl nine homolog 1	344776	273364	410103	406958	535596	362779
P07954;P07954-2	P07954;P07954-2	FUMH-2_HUMAN;FUMH_HUMAN	FH	Fumarate hydratase, mitochondrial	3532600	3480000	2941460	3380850	3580310	3603440
P48506	P48506;A0A2R8Y648;A0A2R8YEL6;B4E2I4;E1CEI4	GSH1_HUMAN	GCLC	Glutamate--cysteine ligase catalytic subunit	1009150	1032870	1155960	896887	980931	1036080
P48507	P48507	GSH0_HUMAN	GCLM	Glutamate--cysteine ligase regulatory subunit	2124730	2080700	2708360	2104830	1802210	1919640
O75223	O75223;O75223-3;M0QZK8	GGCT_HUMAN	GGCT	Gamma-glutamylcyclotransferase	2392080	2217820	2156120	2151840	2881420	2335890
Q04760	Q04760;Q04760-2	LGUL_HUMAN	GLO1	Lactoylglutathione lyase	15469500	16124200	14564500	23460200	21533500	14893300
P35754	P35754	GLRX1_HUMAN	GLRX	Glutaredoxin-1	12373500	11879600	13359400	14289800	13340200	13730000
Q86SX6	Q86SX6	GLRX5_HUMAN	GLRX5	Glutaredoxin-related protein 5, mitochondrial	1123360	1164360	1287350	1242350	1207010	1211580
P07203	P07203;A0A087WUQ6;A0A2R8Y6B6	GPX1_HUMAN	GPX1	Glutathione peroxidase 1	2341580	3072920	2723330	3847760	3119420	4326250
P36969;P36969-2	P36969;A0A087WT12;A0A087X2I2;K7ERP4;P36969-2	GPX4-2_HUMAN;GPX4_HUMAN	GPX4	Phospholipid hydroperoxide glutathione peroxidase	1577040	1652030	1803840	1933710	1841720	2657810
Q96SL4	Q96SL4	GPX7_HUMAN	GPX7	Glutathione peroxidase 7	657341	740723	477296	831668	595994	611532
P00390;P00390-2	P00390;P00390-2;P00390-3;P00390-4;P00390-5	GSHR-2_HUMAN;GSHR_HUMAN	GSR	Glutathione reductase, mitochondrial	7454110	6610850	7025090	5581570	5786930	6203980
P48637	P48637;A0A2R8Y430;A0A2R8Y5T7;P48637-2	GSHB_HUMAN	GSS	Glutathione synthetase	8046390	7983970	7234450	7174440	7914590	8212280
Q9Y2Q3	Q9Y2Q3;C9JNT3;E9PFN5;Q9Y2Q3-2;Q9Y2Q3-3;Q9Y2Q3-4	GSTK1_HUMAN	GSTK1	Glutathione S-transferase kappa 1	9651840	7936550	8432930	7667390	6135860	8006390
P09488	P09488;P46439;A0A3B3IRM5;A0A3B3IU61;E7EWW9;H3BRM6;P09488-2;Q5T8R1	GSTM1_HUMAN	GSTM1	Glutathione S-transferase Mu 1		1887070	1323240			2215890
P28161	P09488;P28161;Q03013;A0A0A0MR85;B9ZVX7;E7EWW9;E9PHN6;E9PHN7;E9PLF1;F6XZQ7;H3BQT3;P09488-2;P28161-2;Q03013-2;Q03013-3	GSTM2_HUMAN	GSTM2	Glutathione S-transferase Mu 2	1856090	2839220	2776950	1094560	1957870	3635680
P21266	P21266;A0A0A0MTN3	GSTM3_HUMAN	GSTM3	Glutathione S-transferase Mu 3	6677180	13836900	7044370	4464430	7060430	11940800
Q03013;Q03013-2	Q03013;A0A0A0MR85;A6NNT0;Q03013-2;Q03013-3	GSTM4-2_HUMAN;GSTM4_HUMAN	GSTM4	Glutathione S-transferase Mu 4		3426230	2971390	1596920		1905340
P09211	P09211	GSTP1_HUMAN	GSTP1	Glutathione S-transferase P	21044600	23296000	18932900	16382600	27494400	15963800
P30711;P30711-2	P30711;A0A0G2JRQ5;P30711-2	GSTT1-2_HUMAN;GSTT1_HUMAN	GSTT1	Glutathione S-transferase theta-1	96682.3	49092.6				97267.6
Q16775	Q16775;H3BPK3;H3BPQ4;H3BV79;Q16775-2	GLO2_HUMAN	HAGH	Hydroxyacylglutathione hydrolase, mitochondrial	2892770	3764180	3585780	3437820	3759770	3541860
Q9NWT6	Q9NWT6	HIF1N_HUMAN	HIF1AN	Hypoxia-inducible factor 1-alpha inhibitor	605325	804825	725755	793851	630198	701767
Q6YN16	Q6YN16	HSDL2_HUMAN	HSDL2	Hydroxysteroid dehydrogenase-like protein 2	623943	981533	1233000	1107530	1053080	1087420
O75874	O75874	IDHC_HUMAN	IDH1	Isocitrate dehydrogenase [NADP] cytoplasmic	4482950	3679490	3533660	2848190	3585870	4066530
P48735	P48735;P48735-2	IDHP_HUMAN	IDH2	Isocitrate dehydrogenase [NADP], mitochondrial	16736700	14181300	15444900	13118200	18319100	15495600
P50213	P50213;H0YKD0;H0YL72;H0YLI6;H0YM64;H0YMU3	IDH3A_HUMAN	IDH3A	Isocitrate dehydrogenase [NAD] subunit alpha, mitochondrial	5021280	4613990	4723690	4798260	5033850	4970650
O43837	O43837;A0A087WZN1;A0A0D9SG66;O43837-3	IDH3B_HUMAN	IDH3B	Isocitrate dehydrogenase [NAD] subunit beta, mitochondrial	747522	792611	1014870	999432	1155290	860079
P51553;P51553-2	P51553;E7EQB8;E9PF84;G5E9Q7;H7C1W2;P51553-2	IDH3G-2_HUMAN;IDH3G_HUMAN	IDH3G	Isocitrate dehydrogenase [NAD] subunit gamma, mitochondrial	1705630	1565760	1697400	1687760	1717550	1585920
Q96A73	Q96A73;A0A087WT18;Q96A73-2;Q96A73-3	P33MX_HUMAN	KIAA1191	Putative monooxygenase p33MONOX	344175	309592	227673	254077	265902	236143
Q9H9P8	Q9H9P8;C9JVN9;Q9H9P8-2	L2HDH_HUMAN	L2HGDH	L-2-hydroxyglutarate dehydrogenase, mitochondrial	1181880	1221890	975787	1248350	1262980	1338740
P40925;P40925-3	P40925;C9IZI0;C9JF79;C9JLV6;F8WFC2;P40925-3	MDHC-3_HUMAN;MDHC_HUMAN	MDH1	Malate dehydrogenase, cytoplasmic	13058500	14359400	15008900	12559300	15563000	13876700
P40926	P40926;G3XAL0;P40926-2	MDHM_HUMAN	MDH2	Malate dehydrogenase, mitochondrial	27380400	25022600	24425400	27716500	28595000	33555700
P23368	P23368;A0A1W2PPH1;A0A1W2PPY2;A0A1W2PQ37;A0A1W2PQF8;A0A1W2PQH3;A0A1W2PQH4;A0A1W2PQT3;A0A1W2PQY8;A0A1W2PR68;A0A1W2PRS2;A0A1W2PRY9;P23368-2	MAOM_HUMAN	ME2	NAD-dependent malic enzyme, mitochondrial	3043960	3196190	3222090	3274410	3992850	3718350
Q99735;Q99735-2	Q99735;Q99735-2	MGST2-2_HUMAN;MGST2_HUMAN	MGST2	Microsomal glutathione S-transferase 2	122904		369716	412333	1118150	270551
P39210	P39210;B5MC53;B5MCF8;G5E9F5	MPV17_HUMAN	MPV17	Protein Mpv17		75750.6	120051	135733	78022.3
Q9UJ68;Q9UJ68-2;Q9UJ68-3;Q9UJ68-4;Q9UJ68-5	Q9UJ68;E5RIA9;E5RJK1;H0YAN3;Q9UJ68-2;Q9UJ68-3;Q9UJ68-4;Q9UJ68-5	MSRA-2_HUMAN;MSRA-3_HUMAN;MSRA-4_HUMAN;MSRA-5_HUMAN;MSRA_HUMAN	MSRA	Mitochondrial peptide methionine sulfoxide reductase	349218	387966	247755	317615	319945	364408
Q6XQN6	Q6XQN6;C9J8U2;G5E977;Q6XQN6-2	PNCB_HUMAN	NAPRT	Nicotinate phosphoribosyltransferase	1309240	2309270	2533000	2078000	1952320	1288190
Q02218	Q02218;A0A0D9SFS3;E9PCR7;E9PDF2;E9PFG7;Q02218-2;Q02218-3	ODO1_HUMAN	OGDH	2-oxoglutarate dehydrogenase, mitochondrial	4512690	4568670	4766690	4630790	4050120	4529670
Q13438;Q13438-2;Q13438-3;Q13438-4;Q13438-5;Q13438-6;Q13438-7	Q13438;B4E321;F8VZI7;F8W0R2;F8W1N0;F8W1V2;Q13438-2;Q13438-3;Q13438-4;Q13438-5;Q13438-6;Q13438-7	OS9-2_HUMAN;OS9-3_HUMAN;OS9-4_HUMAN;OS9-5_HUMAN;OS9-6_HUMAN;OS9-7_HUMAN;OS9_HUMAN	OS9	Protein OS-9	1095070	798219	986962	889925	774228	930976
Q8N573;Q8N573-2;Q8N573-5;Q8N573-8	Q8N573;H0YC07;Q8N573-2;Q8N573-5;Q8N573-6;Q8N573-8	OXR1-2_HUMAN;OXR1-5_HUMAN;OXR1-8_HUMAN;OXR1_HUMAN	OXR1	Oxidation resistance protein 1	179477	343320	222315	288760	402724	242590
Q16822	Q16822;A0A0A0MS74;H0YM31;H0YML5;Q16822-2;Q16822-3	PCKGM_HUMAN	PCK2	Phosphoenolpyruvate carboxykinase [GTP], mitochondrial	2968880	2593870	2688860	2444840	2627600	2423170
P08559;P08559-2;P08559-4	P08559;P29803;P08559-2;P08559-3;P08559-4;Q5JPU3	ODPA-2_HUMAN;ODPA-4_HUMAN;ODPA_HUMAN	PDHA1	Pyruvate dehydrogenase E1 component subunit alpha, somatic form, mitochondrial	6174770	5845540	5918920	5728430	5415210	6462320
P11177;P11177-2	P11177;C9J634;F8WF02;P11177-2;P11177-3	ODPB-2_HUMAN;ODPB_HUMAN	PDHB	Pyruvate dehydrogenase E1 component subunit beta, mitochondrial	6580090	7098030	6426170	7164030	7294630	7397390
O00330;O00330-3	O00330;H0YD97;O00330-2;O00330-3	ODPX-3_HUMAN;ODPX_HUMAN	PDHX	Pyruvate dehydrogenase protein X component, mitochondrial	1071910	1079410	1091200	1064660	1061210	1211620
Q15120;Q15120-2	Q15120;Q15120-2	PDK3-2_HUMAN;PDK3_HUMAN	PDK3	[Pyruvate dehydrogenase (acetyl-transferring)] kinase isozyme 3, mitochondrial	772480	823805	871399	772284	852890	779726
Q9P0J1;Q9P0J1-2	Q9P0J1;Q9P0J1-2	PDP1-2_HUMAN;PDP1_HUMAN	PDP1	[Pyruvate dehydrogenase [acetyl-transferring]]-phosphatase 1, mitochondrial	2166970	1922610	2294160	2139870	2111240	2629990
Q8NCN5	Q8NCN5;A8MT40	PDPR_HUMAN	PDPR	Pyruvate dehydrogenase phosphatase regulatory subunit, mitochondrial	1240330	1139970	1453100	1279570	1284850	1423090
Q06830	Q06830;A0A0A0MSI0	PRDX1_HUMAN	PRDX1	Peroxiredoxin-1	69678100	62979900	63636500	61114000	50592500	56192700
P32119	P32119	PRDX2_HUMAN	PRDX2	Peroxiredoxin-2	20818400	19380400	17709600	17524100	18895100	21466200
P30048;P30048-2	P30048;P30048-2	PRDX3-2_HUMAN;PRDX3_HUMAN	PRDX3	Thioredoxin-dependent peroxide reductase, mitochondrial	17532700	17371700	18184800	19084700	20572500	21295000
Q13162	Q13162;A6NG45	PRDX4_HUMAN	PRDX4	Peroxiredoxin-4	2085340	2167250	1909130	2474980	2254380	2170580
P30041	P30041	PRDX6_HUMAN	PRDX6	Peroxiredoxin-6	19696900	22949000	19127600	15518700	22612000	18390300
P31040	P31040;D6RFM5;A0A494C1T6	SDHA_HUMAN	SDHA	Succinate dehydrogenase [ubiquinone] flavoprotein subunit, mitochondrial	6278290	6510360	6217840	6789710	7096650	7073670
P21912	P21912	SDHB_HUMAN	SDHB	Succinate dehydrogenase [ubiquinone] iron-sulfur subunit, mitochondrial	5610190	5293540	5530370	5808410	6179640	6495140
Q9BVL4	Q9BVL4;A0A087X0Q9	SELO_HUMAN	SELENOO	Protein adenylyltransferase SelO, mitochondrial	176324	273101	379108	206226	265861	233641
P00441	P00441;H7BYH4	SODC_HUMAN	SOD1	Superoxide dismutase [Cu-Zn]	11523300	12777600	13540600	14372200	13161900	15813000
P04179;P04179-4	P04179;F5GXZ9;F5GYZ5;F5H3C5;F5H4R2;G5E9P6;G8JLJ2;P04179-2;P04179-3;P04179-4	SODM-4_HUMAN;SODM_HUMAN	SOD2	Superoxide dismutase [Mn], mitochondrial	4366820	5066040	4582900	4897070	4351570	5768060
Q9BYN0	Q9BYN0	SRXN1_HUMAN	SRXN1	Sulfiredoxin-1	353016	370929	293221	433462	322874	394926
Q9P2R7;Q9P2R7-2	Q9P2R7;A0A0U1RQF8;A0A0U1RQU7;A0A2R8Y5P4;A0A2R8Y5P6;A0A2R8Y6E6;A0A2R8Y6Y7;A0A2R8YDQ9;Q9P2R7-2	SUCB1-2_HUMAN;SUCB1_HUMAN	SUCLA2	Succinate--CoA ligase [ADP-forming] subunit beta, mitochondrial	2227500	2231460	2734920	2269150	2332520	2467990
P53597	P53597	SUCA_HUMAN	SUCLG1	Succinate--CoA ligase [ADP/GDP-forming] subunit alpha, mitochondrial	5671710	5506560	5831500	5534690	5241350	5848770
Q96I99	Q96I99;E9PDQ8;H0Y852;Q96I99-2	SUCB2_HUMAN	SUCLG2	Succinate--CoA ligase [GDP-forming] subunit beta, mitochondrial	3257060	3026740	2929770	2972040	2714970	3470250
P10599	P10599	THIO_HUMAN	TXN	Thioredoxin	8557200	8502860	8681930	10459400	9648280	9401810
Q99757	Q99757;F8WDN2	THIOM_HUMAN	TXN2	Thioredoxin, mitochondrial	621737	798740	803299	1123600	895404	822646
Q9H3M7	Q9H3M7;Q9H3M7-2	TXNIP_HUMAN	TXNIP	Thioredoxin-interacting protein	2055530	2811620	3486000	3326420	2725240	3414430
Q16881;Q16881-2;Q16881-3;Q16881-4;Q16881-5;Q16881-6	Q16881;A0A087WSW9;A0A087WSY9;A0A182DWI3;E2QRB9;E9PIR7;E9PKD3;F8W809;Q16881-2;Q16881-3;Q16881-4;Q16881-5;Q16881-6;Q16881-7	TRXR1-2_HUMAN;TRXR1-3_HUMAN;TRXR1-4_HUMAN;TRXR1-5_HUMAN;TRXR1-6_HUMAN;TRXR1_HUMAN	TXNRD1	Thioredoxin reductase 1, cytoplasmic	3978490	4089900	4571240	3776700	3598380	4008450
Q9NNW7;Q9NNW7-2	Q9NNW7;A0A096LPD9;A0A182DWF2;A0A182DWF3;D3YTF8;E7EWK1;Q9NNW7-2	TRXR2-2_HUMAN;TRXR2_HUMAN	TXNRD2	Thioredoxin reductase 2, mitochondrial	1126710	1151840	1525470	1415250	1005110	1260720
TCA CYCLE
ELECTRON TRANSPORT CHAIN
P25705	P25705;K7EJP1;K7EK77;K7ENJ4;K7ERX7;P25705-2	ATPA_HUMAN	ATP5F1A	ATP synthase subunit alpha, mitochondrial	18311900	18956000	24146200	23570900	25617700	23668300
P06576	P06576;F8W079;H0YH81	ATPB_HUMAN	ATP5F1B	ATP synthase subunit beta, mitochondrial	54628700	56856300	54555100	58246700	61229800	62772500
P36542	P36542;P36542-2	ATPG_HUMAN	ATP5F1C	ATP synthase subunit gamma, mitochondrial	3102670	3442000	4413390	4354800	4797550	3995010
P30049	P30049	ATPD_HUMAN	ATP5F1D	ATP synthase subunit delta, mitochondrial	11540200	11883700	13006800	14397800	14345600	14648000
P56381;Q5VTU8	P56381;Q5VTU8	AT5EL_HUMAN;ATP5E_HUMAN	ATP5F1E;ATP5F1EP2	ATP synthase subunit epsilon, mitochondrial	4558720	4001250	4747370	5173220	4971240	5600330
Q9UII2	Q9UII2	ATIF1_HUMAN	ATP5IF1	ATPase inhibitor, mitochondrial	835566	927579	771772	1068850	800200	914410
Q96IX5	Q96IX5	ATPMD_HUMAN	ATP5MD	ATP synthase membrane subunit DAPIT, mitochondrial	1900630	2103200	2447910	2048780	2170860	1536860
P56385	P56385	ATP5I_HUMAN	ATP5ME	ATP synthase subunit e, mitochondrial	6309300	6315270	5926030	6182470	6189410	6748750
P56134;P56134-2;P56134-3;P56134-4	P56134;C9JJT5;C9JU26;P56134-2;P56134-3;P56134-4;G3V325	ATPK-2_HUMAN;ATPK-3_HUMAN;ATPK-4_HUMAN;ATPK_HUMAN	ATP5MF	ATP synthase subunit f, mitochondrial	1873720	1863200	2297450	1888680	2233460	1806540
O75964	O75964;A0A3B3ITX4;E9PN17	ATP5L_HUMAN	ATP5MG	ATP synthase subunit g, mitochondrial	10197600	9464210	11310600	11290000	12576300	11969400
P56378	P56378;A0A0A0MTQ5;G3V556;P56378-2	ATP68_HUMAN	ATP5MPL	ATP synthase subunit ATP5MPL, mitochondrial	1248910	1438880	1594850	1591450	1823130	1405260
P24539	P24539;Q5QNZ2	AT5F1_HUMAN	ATP5PB	ATP synthase F(0) complex subunit B1, mitochondrial	1564490	1934270	2200500	2168970	2236850	1605320
O75947	O75947	ATP5H_HUMAN	ATP5PD	ATP synthase subunit d, mitochondrial	9903870	11029200	9922430	11034700	11162300	11862100
P18859;P18859-2	P18859;A8MUH2;P18859-2	ATP5J-2_HUMAN;ATP5J_HUMAN	ATP5PF	ATP synthase-coupling factor 6, mitochondrial	1533820	1893890	1852230	2107080	2106020	2058080
P48047	P48047	ATPO_HUMAN	ATP5PO	ATP synthase subunit O, mitochondrial	6630460	5861440	8619560	8892860	9867240	9411050
Q5TC12	Q5TC12;A8MRA7;H0YD21;H0YEW4;I3L448;Q5TC12-2;Q5TC12-3	ATPF1_HUMAN	ATPAF1	ATP synthase mitochondrial F1 complex assembly factor 1	751024	722009	719089	764218	638105	751468
Q8N5M1	Q8N5M1;C9J2Q2	ATPF2_HUMAN	ATPAF2	ATP synthase mitochondrial F1 complex assembly factor 2	543762	568577	586266	657570	617624	624064
Q9Y276	Q9Y276;H7C492	BCS1_HUMAN	BCS1L	Mitochondrial chaperone BCS1		84444.3	119598	156675	135968
Q53S33	Q53S33	BOLA3_HUMAN	BOLA3	BolA-like protein 3	352814	415971	396842	428489	389415	297286
Q9Y2R0	Q9Y2R0;K7EPV0	COA3_HUMAN	COA3	Cytochrome c oxidase assembly factor 3 homolog, mitochondrial	670639	734389	683060	636086	667257	691381
Q9NYJ1;Q9NYJ1-2	Q9NYJ1;Q9NYJ1-2	COA4-2_HUMAN;COA4_HUMAN	COA4	Cytochrome c oxidase assembly factor 4 homolog, mitochondrial	561842	681529	887911	915506	787750
Q5JTJ3;Q5JTJ3-2;Q5JTJ3-3	Q5JTJ3;Q5JTJ3-2;Q5JTJ3-3;X6R5Z6	COA6-2_HUMAN;COA6-3_HUMAN;COA6_HUMAN	COA6	Cytochrome c oxidase assembly factor 6 homolog	1631950	1981390	1623970	1635650	1607030	1674530
Q96BR5	Q96BR5	COA7_HUMAN	COA7	Cytochrome c oxidase assembly factor 7	597164	600853	384776	765308	516033	560792
Q9NZJ6	Q9NZJ6	COQ3_HUMAN	COQ3	Ubiquinone biosynthesis O-methyltransferase, mitochondrial	985503	965431	1127820	1000490	1028950	1207030
Q5HYK3	Q5HYK3;F8VP53;F8VVW7;F8VVX6	COQ5_HUMAN	COQ5	2-methoxy-6-polyprenyl-1,4-benzoquinol methylase, mitochondrial	693117	847433	893845	789704	770983	778162
Q9Y2Z9;Q9Y2Z9-3	Q9Y2Z9;A0A0D9SFJ1;Q9Y2Z9-2;Q9Y2Z9-3	COQ6-3_HUMAN;COQ6_HUMAN	COQ6	Ubiquinone biosynthesis monooxygenase COQ6, mitochondrial	1288350	1307500	1258620	1272150	1220700	1582620
Q8NI60;Q8NI60-3	Q8NI60;Q8NI60-2;Q8NI60-3;Q8NI60-4	COQ8A-3_HUMAN;COQ8A_HUMAN	COQ8A	Atypical kinase COQ8A, mitochondrial	204871	323385	346928	247916	333415	363148
O75208	O75208;H3BNT2;H3BPC6;H3BPW3;H3BRC0;H3BSJ5;H3BVA5;O75208-2	COQ9_HUMAN	COQ9	Ubiquinone biosynthesis protein COQ9, mitochondrial	765143	958967	941449	1178190	1154090	1157000
Q9Y6N1	Q9Y6N1	COX11_HUMAN	COX11	Cytochrome c oxidase assembly protein COX11, mitochondrial	244768	311076	314077	380705	217998	254506
Q96I36	Q96I36	COX14_HUMAN	COX14	Cytochrome c oxidase assembly protein COX14	327052	358522	385372	391305	250689	201902
Q14061	Q14061;C9J8T6	COX17_HUMAN	COX17	Cytochrome c oxidase copper chaperone	3389750	5489690	6610120	6486130	4807590	4133640
Q49B96	Q49B96	COX19_HUMAN	COX19	Cytochrome c oxidase assembly protein COX19	959885	1125750	1071090	1120040	831272	1061300
Q5RI15;Q5RI15-2	Q5RI15;Q5RI15-2	COX20-2_HUMAN;COX20_HUMAN	COX20	Cytochrome c oxidase assembly protein COX20, mitochondrial	483924	420159	562275	482010	496339	392155
P13073	P13073	COX41_HUMAN	COX4I1	Cytochrome c oxidase subunit 4 isoform 1, mitochondrial	7664650	8241120	8026370	9154880	10046300	8447190
P20674	P20674;H3BNX8;H3BRI0	COX5A_HUMAN	COX5A	Cytochrome c oxidase subunit 5A, mitochondrial	23337600	22865300	21163200	26538500	28199400	28955600
P10606	P10606	COX5B_HUMAN	COX5B	Cytochrome c oxidase subunit 5B, mitochondrial	15303900	16652900	14674000	18491100	19278300	20573700
P12074	P12074	CX6A1_HUMAN	COX6A1	Cytochrome c oxidase subunit 6A1, mitochondrial	747798	1033060	788215	939285	956879	931482
P14854	P14854	CX6B1_HUMAN	COX6B1	Cytochrome c oxidase subunit 6B1	3811840	4086970	3541260	4341320	3935550	4468110
P09669	P09669	COX6C_HUMAN	COX6C	Cytochrome c oxidase subunit 6C	3233220	2961010	3263480	3936430	3786750	4004960
P14406	P14406;D6RGV5;D6RIE3;H0UI06	CX7A2_HUMAN	COX7A2	Cytochrome c oxidase subunit 7A2, mitochondrial	3578350	3856060	3380600	3645320	3493640	4814070
O14548	O14548;E5RJZ1;H0YBD2	COX7R_HUMAN	COX7A2L	Cytochrome c oxidase subunit 7A-related protein, mitochondrial	1106640	1160100	1330880	1326940	893223	1337720
P15954	P15954;D6R9Z7	COX7C_HUMAN	COX7C	Cytochrome c oxidase subunit 7C, mitochondrial	1768180	1498650	2920000	3979920	4469750	5029060
O14569	O14569;U3KQU4	C56D2_HUMAN	CYB561D2	Cytochrome b561 domain-containing protein 2		830199	1021550	1038860	1083890	914440
P00167;P00167-2	P00167;J3KNC7;P00167-2	CYB5-2_HUMAN;CYB5_HUMAN	CYB5A	Cytochrome b5	733853	1540910	1480480	1601990	844918	1220030
O43169	O43169;H3BUX2	CYB5B_HUMAN	CYB5B	Cytochrome b5 type B	691499	1312240	1069830	1219170	1136990	1040640
Q9UHQ9	Q9UHQ9;H7C0R7	NB5R1_HUMAN	CYB5R1	NADH-cytochrome b5 reductase 1	628173	703926	1046530	869111	831852	1010410
P00387;P00387-2;P00387-3	P00387;P00387-2;P00387-3	NB5R3-2_HUMAN;NB5R3-3_HUMAN;NB5R3_HUMAN	CYB5R3	NADH-cytochrome b5 reductase 3	1960160	1975110	2661640	2237240	2659580	1953800
Q7L1T6	Q7L1T6	NB5R4_HUMAN	CYB5R4	Cytochrome b5 reductase 4	336743	328818	371143	349759	358999	332319
Q9BQA9;Q9BQA9-2	Q9BQA9;H0Y2X1;Q9BQA9-2	CYBC1-2_HUMAN;CYBC1_HUMAN	CYBC1	Cytochrome b-245 chaperone 1	855307	835536	845000	696184	837964	708261
P08574	P08574	CY1_HUMAN	CYC1	Cytochrome c1, heme protein, mitochondrial	2027230	2046190	2767570	2723110	2673080	2050680
P99999	P99999;C9JFR7	CYC_HUMAN	CYCS	Cytochrome c	5763470	5258920	7452450	6801750	7744140	7215940
Q99766	Q99766;A0A2R8YDJ1	ATP5S_HUMAN	DMAC2L	ATP synthase subunit s, mitochondrial	385435	452517	546845	508680	424047	487678
P13804	P13804;H0YK49;H0YL83;P13804-2	ETFA_HUMAN	ETFA	Electron transfer flavoprotein subunit alpha, mitochondrial	11943000	12282500	11949900	12686500	13056000	13323800
P38117	P38117;M0QY67	ETFB_HUMAN	ETFB	Electron transfer flavoprotein subunit beta	5523260	5040300	5733440	5566870	6108770	5458090
Q16134	Q16134;Q16134-3	ETFD_HUMAN	ETFDH	Electron transfer flavoprotein-ubiquinone oxidoreductase, mitochondrial	1275900	1118750	1317830	1397290	1241990	1509840
P10109	P10109	ADX_HUMAN	FDX1	Adrenodoxin, mitochondrial	1474360	1251420	1389170	1448480	1199000	1221700
[truncated: 499 more rows]

## Sheet: Cell cycle.mitosis.apoptosis
Protein Group	Protein Ids	Protein Names	Genes	First Protein Description	Donor 1	Donor 2	Donor 3	Donor 4	Donor 5	Donor 6
[truncated: 253 more rows]

## Sheet: Transcription
Protein Group	Protein Ids	Protein Names	Genes	First Protein Description	Donor 1	Donor 2	Donor 3	Donor 4	Donor 5	Donor 6
[truncated: 316 more rows]

[truncated: 13 more sheets: Translation, Lysosomes, ER, Golgi, DNA and nucleus, RNA, TCR. immune function.markers, Vesicles.exo.endocytosis, Signaling Pathways, Protein function and transport, Proteosome, Transporters, OTHER]
