# Supplementary material for: A History and Atlas of the Human CD4+ T Helper Cell
Source: Preprints.org preprint supplement (doi:10.20944/preprints202307.2055.v1), 2023-07-31
Supplement: Supplementary file 2 [file SUPPLEMENTARY TABLE 1.xlsx]

## Sheet: RAW COUNTS
gene_id	NAÏVE 0H	NAÏVE 40M	NAÏVE 150M	NAÏVE 15H	CM 0H	CM 40M	CM 150M	CM 15H	EM 0M	EM 40M	EM 150M	EM 15H
A1BG	2.38635	2.97251	1.57388	1.75395	4.47552	7.28052	2.30791	0.725802	5.32469	6.09637	2.44535	1.86663
A1BG-AS1	1.32229	0.701387	0.533699	0.487289	1.40792	0.649578	0.750444	0.745981	1.3727	1.01617	1.15884	0.696104
A1CF	0.03322	0.0269339	0	0.0469249	0	0	0	0	0	0	0	0
A2LD1	0.207852	0.621079	0	0	1.42538	0	0.376852	0	0	1.16808	0.258608	0
A2LD1	0.494122	0.309347	0.288504	0.494747	0.564321	1.22799	0.336743	1.14315	1.92726	0.627138	0	1.68802
A2M	0.265578	0.23142	0.0490143	0	0.894393	0.374827	0.171088	0	0.527186	0.694079	0.14884	0
A2M-AS1	0.395525	0.293129	0.15277	0	1.21785	0.598104	0.681791	0.0732606	0.517674	0.476356	0.712503	0
A2ML1	0.0388449	0.0533107	0.0166497	0	0	0	0	0	0	0	0	0
A2ML1	0	0	0	0	0	0	0	0	0	0	0	0
A2MP1	0	0.369127	0	0.0914176	0.693024	0.363046	0.211597	0	0.314225	0.260231	0	0
A4GALT	0	0.0794673	0.0413423	0.0524821	0.0795719	0	0.060738	0	0.180394	0.0497988	0.0827621	0
A4GNT	0.0930347	0	0.0244179	0.0619947	0.0939946	0	0	0	0	0	0	0
AA06	0	0	0	0	0	0	0	0	0	0	0	0
AAAS	14.5972	9.56227	5.34328	43.7489	16.7616	10.8321	5.18718	34.0145	16.1261	9.92411	4.62476	38.8253
AACS	3.02639	2.95347	1.84904	2.01667	2.45611	2.23195	2.60173	2.55697	2.72726	1.72534	2.29391	2.25594
AACSP1	0.0189559	0.0510034	0	0	0	0	0	0	0	0	0.079677	0
AADAC	0.0256483	0.0345051	0.0269265	0	0	0	0	0	0	0	0	0
AADACL2	0.109843	0	0	0	0	0	0.0847092	0	0	0	0	0
AADACL3	0	0	0	0	0.0866066	0	0	0	0	0	0	0
AADACL4	0	0.0351842	0	0	0	0	0	0	0.119804	0	0	0
AADAT	0.0265635	0	0	0	0	0	0	0	0	0	0	0
AADAT	0.0293106	0	0	0	0	0	0	0	0	0	0	0
AAED1	2.92541	10.9926	6.14242	3.94357	6.11502	11.7458	15.2477	5.75487	5.8533	10.7156	15.8298	8.56226
AAGAB	6.54425	3.77875	4.0888	10.6512	7.95753	3.83144	5.27013	13.7976	5.17328	4.94347	6.14656	14.747
AAK1	19.8643	17.7125	6.03363	3.72773	15.7188	11.6565	5.38968	4.91249	13.381	13.4137	4.71418	5.69341
AAMP	14.2894	17.833	41.5075	82.8496	21.1678	26.3848	47.6224	78.2786	21.9948	21.4401	40.3635	74.5437
AANAT	0.0252547	0.0289677	0.0450583	0.108132	0.163833	0.113962	0	0	0.215175	0	0.0905061	0
AANAT	0.0733539	0	0	0	0.181267	0	0	0	0	0.304497	0	0
AAR2	6.33351	12.8541	17.644	24.9698	6.22591	9.22441	12.2408	23.1222	6.91467	8.5012	11.2504	22.1901
AARD	0	0	0.0242128	0	0	0	0	0	0	0.0583309	0	0
AARS	12.6012	6.64518	57.0682	106.87	8.36304	5.4763	21.8866	89.1181	8.68977	4.6731	19.1053	82.6269
AARS2	4.48778	4.48467	4.81092	16.3013	4.595	4.28541	3.93255	12.6314	3.43292	2.91928	2.8965	11.3429
AARSD1	7.79126	7.80029	17.9537	52.1988	7.37667	8.83539	10.7635	38.6635	8.65569	7.63753	9.90072	35.8118
AASDH	3.35451	1.33831	0.959359	1.26411	1.77637	0.795877	0.713641	1.88972	1.3777	1.02394	0.72931	0.925715
AASDHPPT	5.02404	3.38643	5.5155	8.77455	2.83176	1.76974	5.09633	11.7515	2.78514	2.14772	5.78504	7.53834
AASS	1.60667	1.06658	0.397748	0.261812	0.453659	0.594131	0.259711	0.218322	0.257117	0.26617	0.176942	0.204176
AATF	25.9537	21.8451	38.5379	101.793	33.4328	36.0463	29.1398	100.204	32.7854	29.8767	29.6785	92.1013
AATK	0.0323766	0.141557	0.700467	0.280414	0	1.07088	0.79894	0.566574	0.444782	0.593531	0.762031	0.647611
AATK	0	0	0	0	0.344777	0	1.27291	0	0	0	0.704219	0
AATK-AS1	0	0.0702793	0.0274217	0	0	0	0	0	0	0	0	0
ABAT	0	1.02559	1.72613	1.16626	0.892405	0.96669	3.83428	0.820963	1.31651	1.27647	3.51744	0.78852
ABAT	0.642702	0.395396	0.385842	0.174042	0.720047	0.531875	0.357785	0.707504	0.216416	0.335856	0.873866	0.679545
ABAT	0.946549	0	0	0	0	0	0	0.805239	0	0	0	0.773418
ABCA1	1.59634	1.75712	0.901775	0	0.681582	1.14173	1.59707	0.0152562	0.826494	0.972153	1.4343	0.0856063
ABCA10	0.169163	0.140048	0.102458	0.0346841	0.157761	0.0344352	0.0602103	0.0253074	0.0596089	0.0329108	0.0820431	0
ABCA11P	3.27496	2.77076	2.87976	2.63385	2.61778	1.69779	1.28913	1.30306	2.38977	1.85892	2.21635	1.4406
ABCA12	0.0356373	0	0	0	0	0	0	0	0	0	0	0
ABCA12	0	0.0365348	0.0142463	0	0.0730672	0	0	0	0	0	0	0
ABCA13	0.0311618	0.0322481	0	0	0.0484359	0	0.00739431	0	0.0109807	0	0	0
ABCA17P	0.118026	0.0926233	0.0103257	0.078648	0.238488	0.156167	0	0.114771	0.180222	0.0497512	0	0.143113
ABCA2	7.91656	8.39607	4.45279	2.55766	32.7845	38.6025	15.5893	3.86357	31.6265	32.7566	13.8602	6.50397
ABCA2	1.17588	1.16375	0	0	9.29324	12.1552	5.89249	0	17.6504	12.156	8.44333	0
ABCA3	2.21411	2.33442	0.437468	1.0278	4.3231	4.77296	0.882521	2.05628	3.96017	4.01112	0.758117	1.71943
ABCA4	0.0393635	0.0756521	0.0295181	0	0.0227255	0.119049	0	0	0.02576	0.0142224	0.0236366	0
ABCA5	1.83915	0.910145	0.483302	0.436852	1.1743	0.354991	0.778146	0.343871	0.798801	0.264682	0.179461	0.349429
ABCA5	1.64241	0.956184	0.870655	0.580037	0.727871	0.584936	0.720374	0.492782	0.988704	1.01289	0.876876	0.850828
ABCA6	0.0388889	0.0104636	0.00816541	0	0.0314321	0	0	0	0	0.0196713	0	0.0565859
ABCA7	33.2163	29.9834	7.7824	0.950097	37.5753	38.9781	10.3619	0.916488	35.5354	26.2969	6.01845	1.53839
ABCA8	0.0216037	0.0581278	0.0226804	0	0	0	0	0	0	0	0	0.0523915
ABCA9	0.0457607	0.0615627	0.0411783	0	0.0264187	0	0	0	0.0299464	0	0	0.0475606
ABCB1	1.7032	1.44531	5.39175	1.42013	4.12984	3.32838	7.32853	2.51407	3.56098	5.47846	9.58208	2.79599
ABCB10	3.96212	3.50565	1.21088	3.58669	4.48854	2.65658	1.54835	3.90479	3.27777	2.83609	1.07734	2.9525
ABCB11	0.0345057	0.0116053	0.027169	0	0	0	0	0	0.0395167	0	0	0
ABCB4	0.0427705	0	0.0336101	0	0	0	0	0	0	0	0	0
ABCB5	0	0	0	0	0	0	0	0	0	0	0	0
ABCB5	0.0465529	0	0	0	0	0	0	0	0	0	0	0
ABCB6	1.55593	1.85452	1.36123	10.2953	1.48924	1.01131	1.55777	7.96326	1.06288	1.27721	0.803159	7.2487
ABCB7	7.71363	6.50032	4.47477	6.02548	4.53296	4.65792	3.93914	7.45057	5.05919	3.27333	3.62669	5.1474
ABCB8	5.83167	6.10597	4.08154	8.34639	7.00267	7.21576	4.58548	8.51911	7.09157	6.62937	3.06865	8.89503
ABCB9	0.943935	1.04256	0.305005	0.39386	1.07608	0.863989	0.379771	0.331222	0.697023	0.498396	0.15292	0.527388
ABCC1	22.0736	22.4261	56.8109	29.0248	25.1612	25.2124	47.6272	35.1788	19.6369	19.8421	39.4395	36.2099
ABCC10	8.40893	8.02788	2.33447	6.87561	14.3508	12.4257	5.41402	9.3307	14.2838	9.53639	2.71846	10.4036
ABCC10	0.469695	0.200863	0.733238	1.51867	1.15236	0.0931444	0.0627779	0.375897	1.03842	0.435077	1.38165	0
ABCC11	0	0	0	0	0	0	0	0	0	0	0.0711775	0
ABCC11	0.0367247	0	0	0.0488101	0	0	0	0	0	0	0	0
ABCC12	0.00797042	0	0	0	0	0	0	0	0	0	0	0
ABCC13	0.152831	0.0588688	0.0306261	0	0	0	0.0449943	0	0	0.0368906	0.0613096	0
ABCC2	1.35374	0.976431	0.470881	0.347789	0.922788	0.302131	0.477967	0.222044	0.70979	0.309381	0.274224	0.237323
ABCC3	0.0239205	0.0643573	0.00837089	0.0212529	0.0911674	0	0.0245962	0	0.0703948	0	0	0
ABCC4	1.27654	1.17165	0.461999	5.74978	0.911618	0.559496	0.727911	3.86626	0.613458	0.926988	0.473778	4.67553
ABCC5	5.92024	4.00547	1.13221	3.43078	4.88152	4.33426	1.34617	3.49651	5.46015	3.48314	1.48509	4.452
ABCC5-AS1	0.175655	0.236312	0	0	0	0	0	0	0	0	0	0
ABCC6	0.225396	0.216593	0.0845105	0.0643693	0.19519	0.127815	0.0744951	0	0.221253	0.203594	0.0676718	0.0585654
ABCC6P1	0	0.0203433	0	0	0	0	0	0	0	0	0	0
ABCC6P2	0	0	0	0	0	0	0	0	0	0	0	0
ABCC8	0.0496478	0	0	0	0	0	0.0255251	0	0	0	0	0
ABCC9	0.0344221	0.0535651	0.0216825	0	0	0	0	0	0	0	0	0
ABCD1	3.87853	4.21966	1.60513	2.96656	8.405	9.69854	5.02845	3.97928	8.96081	7.93285	3.21326	3.10803
ABCD2	4.69676	2.43823	0.234802	0.0411131	2.77389	1.26536	0.166532	0.0299983	2.15507	1.0533	0.291751	0
ABCD3	4.60135	3.69258	4.09797	10.3813	3.50297	4.79145	3.01395	10.8958	3.54234	3.71155	4.68705	8.39368
ABCD4	7.86384	6.07314	2.75809	5.67143	7.43169	7.43662	4.78241	7.47261	7.71309	6.2401	5.17036	10.4031
ABCE1	7.85197	7.88938	29.4107	26.9192	4.45105	2.73866	18.8712	30.0164	4.45207	3.2998	18.8095	21.0686
ABCF1	16.6252	27.6573	132.346	145.892	20.059	29.3121	96.7078	128.834	18.5935	35.5075	80.0554	127.187
ABCF2	9.76821	6.9218	44.3756	80.3776	15.9535	11.6267	29.8002	75.0731	13.4145	10.7721	26.1702	62.8152
ABCF3	14.3016	18.0121	20.1761	30.0094	17.4749	18.9868	22.083	31.0848	20.1751	20.131	23.6954	34.1392
ABCG1	0	0	0	0	0	0	0	0	0	0	0	0
ABCG1	0	0	0	0	0	0	0	0	0	0	0	0
ABCG1	0.693033	0	0	0	0	0	0	0.127667	0	0	0	0
ABCG1	2.86701	6.43752	12.1787	0.136115	4.94353	9.94542	26.9306	0.126114	3.99014	7.43747	18.4354	0
ABCG1	2.0715	0.580954	0	0.271607	1.63752	0	1.24414	0.126071	0.317115	0.557623	0.990001	0
ABCG2	0	0.0125062	0.0780095	0	0	0	0.0286761	0.144381	0.0425845	0.0235114	0	0.0676324
ABCG2	0.0962712	0.0129596	0	0	0.0389299	0	0.0297156	0	0.0441282	0.0243637	0.242619	0.070084
ABCG4	0.0161113	0.0216748	0	0	0	0	0	0.0417786	0	0	0	0
ABCG4	0.0171107	0.0230193	0	0	0	0	0	0	0	0	0	0
ABCG5	0.060133	0.0606736	0	0.0801405	0	0	0	0	0	0	0	0
ABCG8	0	0.0623811	0.0324533	0	0.124926	0	0	0	0	0	0	0.11245
ABHD1	0.645017	0.777149	0.317634	0.0951863	0.466738	0.189087	0.263618	0.223069	0.263677	0.506426	0.482055	0.210441
ABHD10	4.44004	3.83547	3.76177	8.76181	3.14797	2.47363	3.2679	9.57447	3.56831	2.75814	2.09547	9.52082
ABHD11	0.669515	0.948872	0.579121	5.74086	0	2.34469	0	4.57245	1.59738	1.88458	0.296077	6.25222
ABHD11	2.17097	1.54835	0.198705	1.18593	3.67766	2.04271	0.6734	0.936298	0.979917	0.74118	0	0
ABHD11-AS1	0.17417	0.117157	0.091425	0	0.703866	0.460907	0	0	0	0.220252	0	0
ABHD12	7.03335	7.36996	4.15082	13.7084	12.262	14.889	8.12508	14.1878	12.6617	10.5001	6.30665	12.2798
ABHD12B	0	0	0	0	0	0	0	0	0	0	0	0
ABHD13	4.76238	4.51516	6.06819	2.83696	5.52579	4.76972	7.09372	3.71693	5.33833	5.20699	7.38009	2.43044
ABHD14A,ABHD14A-ACY1	11.4873	12.7285	2.26368	9.26277	20.2822	19.2823	3.78426	9.83221	19.0735	22.2838	2.81271	10.2778
ABHD14B	40.51	41.6927	19.263	13.3315	54.1835	60.4398	26.7911	14.3954	49.4089	50.4379	23.5155	15.8086
ABHD15	5.42667	5.2855	1.53384	4.94148	16.6216	16.9599	4.58263	6.73357	19.9659	13.3523	3.87045	5.62736
ABHD16A	1.12596	0.569021	0.335579	0.198075	1.30612	0.268496	0.494596	0.270621	0.989234	1.28548	0.204042	0.357502
ABHD16A	7.90405	9.42728	10.5869	12.8744	13.7567	13.882	13.3369	14.2936	12.6066	13.2657	11.2672	15.4755
ABHD16B	3.64133	4.02509	2.33752	8.34572	5.24888	5.15562	4.57888	7.39759	4.78105	3.22627	3.997	8.60565
ABHD2	6.84707	5.25616	5.39975	12.2424	7.90857	5.62118	6.36457	9.9965	6.8476	6.04686	6.32672	7.72307
ABHD3	11.0561	6.47048	2.99607	3.77678	9.35556	4.64748	4.55558	3.64844	8.77637	4.94649	4.27812	4.64619
ABHD4	3.20138	2.58413	0.999663	0.83143	6.03757	3.47563	2.32959	1.72418	5.94128	5.60549	2.27723	1.67218
ABHD5	0.784886	0.900639	1.06636	1.74339	0.590851	0.895983	2.46864	1.79586	0.951744	1.18717	2.68456	1.62352
ABHD6	0.946725	1.18102	1.04812	3.21165	1.3217	0.728822	1.59294	3.01293	1.26163	1.21898	1.01293	2.3794
ABHD8	3.94173	5.11729	1.48975	3.93992	7.32762	8.65777	1.5807	4.293	5.68785	5.28372	1.15978	4.87516
ABI1	25.1364	23.9894	23.5454	17.478	21.4549	28.331	31.503	22.8794	24.5642	30.6968	27.268	25.1236
ABI2	6.36301	4.00221	1.46816	1.81293	4.29006	2.42232	1.54908	2.42309	3.66901	2.49194	1.22907	2.35859
ABI3	3.89365	2.65996	2.15872	14.2711	8.95753	3.94499	5.80847	10.9461	10.243	5.45542	3.95752	10.9834
ABI3BP	0.0460442	0	0	0	0.0372154	0	0	0	0.0421847	0	0	0
ABL1	6.96233	9.14898	2.71561	3.77004	8.4903	6.02341	1.95048	5.30295	8.94973	8.54647	4.66764	10.034
ABL1	0.641903	0	1.88361	12.3294	0	5.52357	4.82796	8.1583	0	3.52957	0	0
ABL2	0	0.265609	5.84699	0	0	0	5.52678	0	0	0	3.52935	0
ABL2	4.9751	4.90832	4.43137	2.73724	3.304	4.78119	5.14594	2.60526	3.04031	4.0117	5.39473	1.71644
ABLIM1	67.7963	52.9143	69.5633	22.079	31.4314	22.8285	47.8901	13.9828	24.0384	20.384	30.3935	10.2097
ABLIM1	0.594279	0.411348	0.765604	0.0772428	1.5871	0.946092	0.338098	0.0963565	1.21536	0	0.666747	0
ABLIM1	0.553656	0.410105	0.76329	0.0770093	1.5823	0.943233	0.337076	0.0960653	1.21168	1.81574	0.664731	0
ABLIM2	0.680555	0.997733	0.727972	0.315308	1.2667	2.54617	2.14521	0.103471	1.59526	2.56056	1.85425	0.44041
ABLIM3	0	0	0.0299267	0	0.0384001	0	0.0586223	0.0369598	0.0870552	0	0	0.0691301
ABO	10.826	8.42283	0.876383	1.52973	7.37968	4.00396	0.402355	0.913229	4.66054	3.69476	0.548253	0.759162
ABP1	0.016965	0	0	0	0.0685603	0	0	0	0	0	0	0
ABR	0	0.275293	0	0	0	1.57338	0.814482	0.1012	0	1.59612	1.15569	3.22965
ABR	0.348678	0.433153	0.473367	0	0	0.373617	0.448004	0	0	0	0	0
ABR	11.7303	11.4394	3.30785	11.4801	19.0532	12.9072	7.12653	9.3531	17.8752	15.1945	6.86511	10.536
ABR	2.23073	1.54768	0.739805	0.697328	2.31247	4.912	0.916565	2.15684	4.72389	3.77367	0.265554	1.65896
ABR	0.0765378	0	0	0	0	0	0	0	0	0	0.250533	0
ABRA	0.0448705	0.0603651	0	0	0.181334	0.0791608	0	0	0	0.0378283	0	0
ABRACL	26.762	20.8545	25.1788	51.8429	25.8069	25.0259	29.3224	73.7585	25.68	27.1235	31.1444	57.4533
ABT1	10.2113	22.0387	25.3961	38.2794	11.9901	20.5196	31.2185	40.2853	15.1754	19.1049	24.7122	32.047
ABTB1	41.7201	42.4083	16.4784	3.02468	48.1152	59.1816	21.4016	2.84145	52.4034	38.7062	13.537	3.59174
ABTB2	0.352851	0.395581	2.1697	1.92579	0.577176	0.311251	2.15099	2.18943	0.61576	0.403712	2.57783	2.2615
ACAA1	21.3759	20.5748	8.64409	27.8238	27.631	38.1029	14.3079	27.0976	28.7946	27.6261	12.0226	30.3114
ACAA2	5.77187	3.78222	1.56519	5.6202	7.2301	4.95987	3.0222	6.29617	4.97585	4.90191	3.93903	6.50803
ACACA	0.51365	0.309725	0.0574677	0	0.198504	0	0.171894	0.0992529	0.308631	0.0874411	0.245786	0
ACACA	0.964741	1.75509	1.76572	11.504	0.962185	1.69657	1.38041	9.94253	0	1.64688	1.05495	8.582
ACACA	0.7407	0.639734	0.217511	0.34954	0.34403	0.450138	0.636054	0.898195	0.968046	0.49218	0.397691	0.549691
ACACB	5.79856	4.70331	1.49617	0.391735	4.39154	4.6435	1.31886	0.207877	3.81505	3.18766	0.954703	0.129605
ACAD10	7.72794	6.05381	2.02518	3.41853	6.38572	4.89111	1.61387	2.67356	5.66415	4.33383	0.904962	2.91013
ACAD11	6.1353	5.18172	1.92084	2.05998	3.85848	3.33116	1.38825	1.64654	3.78141	3.04246	1.23849	0.600246
ACAD8	7.03674	5.33758	2.29875	7.13327	7.79002	5.44775	3.17515	6.47872	6.85841	4.78059	2.75322	5.71855
ACAD9	5.41695	4.52417	6.82377	21.9317	6.59896	6.34944	5.93303	19.9283	4.71684	4.49129	6.79549	20.9589
ACADL	0	0.0222551	0	0.0440934	0	0	0	0	0	0	0	0
ACADM	5.50481	3.3347	2.53598	7.77123	4.97673	3.17531	3.01955	9.45731	6.94309	3.47399	2.42223	4.49885
ACADS	4.233	4.13374	1.46628	7.61732	7.46789	5.34503	2.05476	5.93411	7.48075	4.45628	2.43857	4.84614
ACADSB	5.25549	2.86357	1.40483	2.69815	3.33433	1.50452	1.15493	2.72384	3.81132	2.10427	0.99086	2.47168
ACADVL	0	0	0	0	0	0	0.352951	0	0	0	0	0
ACADVL	61.291	68.1443	39.2625	29.7133	86.9118	116.515	52.3844	38.8605	102.076	93.5239	48.4775	47.6375
ACAN	0.0963285	0.103054	0.0200672	0.235924	0.0583129	0.046118	0.0574447	0.126845	0.0399162	0.082407	0.0797739	0.0695325
ACAP1	130.849	121.547	33.8297	15.9786	181.199	177.763	46.205	19.9318	176.128	159.55	39.2115	28.319
ACAP2	13.4891	8.03791	1.85762	2.7563	10.819	6.02033	3.119	3.62005	9.36881	6.24784	3.09089	4.68118
ACAP3	10.3991	14.1965	6.78744	8.14901	20.105	28.1283	14.2647	6.7771	24.5465	22.8645	11.9294	6.61702
ACAT1	5.13441	4.12887	3.20176	13.634	5.3824	3.88207	3.98935	16.2173	5.83584	3.22203	5.03026	12.6388
ACAT2	5.70356	7.45622	4.11442	26.0876	5.95304	6.09307	6.79632	27.2978	3.28955	5.83095	4.40748	23.2336
ACBD3	6.90948	9.01566	11.4145	14.6287	8.59171	9.4175	13.3658	15.3704	7.8335	10.5786	10.4417	12.6933
ACBD4	1.71095	3.49416	1.41203	0	2.01668	2.50574	0.347206	0	3.46228	1.67514	0	0
ACBD4	9.02301	5.34456	1.47923	3.38041	7.76363	9.29413	1.98627	3.37777	7.75923	6.37789	1.37972	2.88492
ACBD5	3.26262	4.2227	1.06363	2.35756	1.91678	4.48438	2.99633	2.12725	3.81002	3.88406	2.29577	3.23281
ACBD5	0.709097	0.374984	0.208007	0.540988	1.60549	0	0	2.40334	0.980741	0.42841	0.285238	0
ACBD6	14.5036	17.1458	9.04485	48.306	16.2756	19.5614	7.62698	33.6107	16.3471	15.73	7.4998	30.2275
ACBD7	0.0488915	0.213768	0.205313	0.0651588	0	0.129382	0.226226	0.237716	0.111983	0.154568	0.308258	0.177851
ACCS	0.109271	0.616427	0	0	1.06813	0	0.892207	0	0	0	0	0.319317
ACCS	11.9758	9.78935	2.9651	0.707223	11.2577	12.6407	3.96572	0.441731	12.2434	9.73216	4.85951	0.275821
ACCSL	0.045265	0.0608958	0.0712814	0	0	0	0.0698153	0	0	0	0	0
ACD	10.2566	12.0227	16.7761	39.2809	18.3336	17.6517	20.2749	38.226	23.5813	17.0307	22.4727	33.848
ACE	0.605109	0.568657	0.139906	0	8.00108	6.33512	2.45467	0.125837	7.28666	7.27428	1.72283	0.120568
ACE	0	0	0.0539387	0	0	2.10997	0	0.102943	1.68631	2.10935	0.744898	0
ACE2	0	0	0	0	0	0	0	0	0	0	0	0
ACER1	1.93083	1.22239	0.238478	0.100912	1.683	1.20226	0	0.147262	0.520291	0.478764	0.159134	0
ACER2	0.491058	0.369176	0.16679	0.11549	0.116735	0.458644	0.267315	0.0561784	0.396968	0.365284	0.0607077	0.105077
ACER3	2.13138	1.18738	0.709727	1.80193	1.74547	0.844803	0.868912	2.44696	1.72047	1.28235	0.749858	1.98101
ACHE	0	0.0747758	0.195931	0	0	0.394858	0.170503	0	0	0.105307	0.391636	0
ACIN1	12.9676	16.1011	31.4875	78.6857	29.6318	37.3294	21.0931	64.3617	38.3616	28.1102	22.0594	68.5787
ACIN1	38.6484	31.1126	24.7296	42.9779	35.3131	35.511	30.333	41.3567	35.7432	31.0715	25.2327	40.7654
ACLY	19.8713	12.9971	23.0126	95.7678	28.9089	23.7872	28.3117	98.2361	32.7255	21.4423	28.8753	94.1069
ACMSD	0.241708	0.0918358	0.0704784	0	0	0	0	0	0	0	0	0
ACN9	3.3041	1.91273	1.07217	7.89951	2.99426	3.07353	0.803029	5.7639	3.4858	3.08941	1.01004	4.662
ACO1	1.93882	1.45254	1.15789	2.47559	1.12603	0.675902	1.00276	2.61917	1.43593	0.734069	0.634385	2.02714
ACO2	22.2149	21.9448	27.7619	64.1064	30.6852	27.7319	29.669	63.6487	25.1393	30.2884	25.7137	69.6165
ACOT1	0.0770888	0.311127	0.107908	0.0684919	0	0	0.158533	0.299852	0	0.19497	0.216018	0
ACOT11	0.117911	0.0441749	0	0.121816	0.365863	0	0.314517	0.158443	0.0753194	0.109903	0	0
ACOT12	0.103547	0.0557217	0	0	0	0.109607	0.0638833	0	0.0948678	0	0	0
ACOT13	2.08752	1.33669	1.4136	2.66627	1.7886	1.06188	1.31995	3.82855	1.65475	0.958293	0.97579	2.32463
ACOT2	0.499731	0.5587	1.11174	0.388722	0	0	0.772721	0.155488	0.399925	0.21761	0.859544	0
ACOT2	2.33382	3.90274	7.68872	5.73312	3.4386	5.88194	7.52621	4.8601	3.75421	4.24232	5.41519	5.39035
ACOT4	0.605752	1.22239	1.0599	2.82554	0.612002	0.935088	0.467146	2.74889	0.578101	1.02136	0.742627	1.83627
ACOT6	0	0.0551944	0	0	0	0	0	0.159583	0	0	0	0
ACOT7	0	0.942757	0.42456	0	3.80452	2.71901	0	0	3.77785	1.6024	1.61695	0
ACOT7	0	0	0	0	0	0	0	0	0	0	0	0
ACOT7	0.436803	0	0	1.13762	0.3044	0	0	0	0	0.292545	0	0
ACOT7	2.3679	2.02443	2.01513	59.4373	2.83222	5.11632	4.7159	50.151	3.10331	4.19515	5.35122	52.6286
ACOT8	6.97551	6.66703	2.69513	7.73533	9.55252	10.2805	3.36373	6.39733	7.88009	9.02817	3.10496	7.4021
ACOT9	4.48726	3.66924	2.82922	9.26603	9.48829	11.858	6.76289	17.7237	11.0388	11.2086	10.3024	18.2452
ACOX1	2.1476	2.04465	1.89992	4.12555	1.63227	1.38902	2.24345	3.97096	1.53178	1.31109	1.88249	4.33859
ACOX2	0.0535181	0.071999	0.0561854	0	0	0	0	0	0	0	0	0.129787
ACOX3	2.71555	1.86541	1.58411	6.1185	3.61807	2.50255	2.49336	14.0453	2.22855	1.77343	3.51632	17.7011
ACOXL	0.0173582	0.0467048	0.0728934	0.138802	0	0	0.107091	0.810219	0	0.131705	0.145923	0.631435
ACP1	25.0855	23.7333	35.8767	52.3435	20.8832	18.6628	23.5993	46.4321	21.4106	29.3735	26.3888	39.0628
ACP2	4.64422	5.0085	9.08712	16.0936	4.98444	6.4404	13.2894	20.5458	7.10613	6.29582	11.9502	26.9494
ACP5	0	0	0	0	0	0	0	0	0	0	0	0
ACP5	6.22833	4.23565	0.938529	0	1.01207	4.57895	1.4197	0	3.89465	3.15648	0	1.11766
ACP5	2.77304	4.09106	0.956323	2.28775	7.63114	3.50504	1.63239	1.8589	3.27715	3.78556	1.88856	0
ACP6	5.44507	3.678	0.454445	2.67194	3.77491	3.61741	1.26502	2.4813	4.4877	3.22678	0.766098	1.49177
ACPL2	5.21606	4.81891	0.972334	1.13168	2.04801	1.23221	0.633483	1.19849	1.44301	1.31643	0.402821	1.29528
ACPP	0.0381391	0.115524	0.0371034	0	0	0	0	0	0	0	0	0
ACPT	0.214059	0.575956	0.642079	1.05962	0.865071	0.809239	0.565986	0.475786	0.980582	0.773415	0.514145	0.444958
ACR	0.0300665	0	0	0	0.121507	0	0	0	0	0	0	0
ACRBP	1.55067	0.73456	0.43565	0.174643	0.970895	0.462373	0.404233	0.169905	0.900439	0.552381	0.183604	0
ACRC	1.16652	0.889294	2.51735	0.89824	0.733323	0.754594	5.51756	0.705819	0.653119	0.622845	4.4129	0.754384
ACRV1	0	0	0	0	0	0	0	0	0	0	0	0
ACSBG1	0.166206	0	0.0872446	0	0	0	0	0	0	0	0	0
ACSBG2	0.0607539	0.0817333	0.0318909	0	0.0613807	0	0	0	0	0	0	0
ACSF2	2.09727	2.277	0.328338	0.294219	3.04825	2.53159	0.851254	0.286236	3.79238	2.60564	0.618627	0.53538
ACSF3	8.31399	9.52074	4.82409	6.23851	8.58589	10.9508	5.42113	7.62245	7.12121	7.31989	4.75009	9.27752
ACSF3	0.349159	0	0.121943	0.297003	0.196735	0.426492	0.142957	0.356828	0.712586	0	0.255017	0.313557
ACSL1	2.0785	2.95645	9.86487	7.84851	1.83745	2.57829	12.8233	7.66365	1.48772	3.25816	14.0604	7.87593
ACSL3	3.68412	6.20785	5.30784	7.3817	2.89994	3.78879	5.4544	8.55826	2.67347	4.65564	5.79469	6.36028
ACSL4	3.44427	2.57945	16.9663	16.1058	3.2475	2.1264	14.3892	16.9568	3.26791	2.12773	14.5053	12.6951
ACSL5	0	0	0	0	0	0	0	0	0	0	0	0
ACSL5	3.27557	0.864218	2.64029	0.261372	3.53938	0.412109	2.59864	0.532751	1.73957	1.07026	2.63349	0.931513
ACSL5	10.8582	7.45585	13.9578	21.2105	13.0584	9.13939	12.5718	31.9942	12.7048	9.20228	15.8256	32.6562
ACSL6	1.87788	2.85412	0.902176	0.651886	2.74922	1.69243	2.95315	2.0248	2.7499	1.40923	3.89297	1.58754
ACSL6	0.992987	0	0	0.185014	0	0.254972	0.289174	0	0	0.167839	0	0
ACSL6	1.87874	0	0.15463	0.222955	0	0	0	0.448043	0	0	0	0.270941
ACSM1	0.341418	0.243168	0.147591	0.0535312	0.0811626	0.106294	0	0.0781184	0	0.203177	0	0
ACSM2A	0.0138971	0.0186961	0.0291795	0.037042	0	0	0	0.0540556	0	0	0	0
ACSM2B	0	0	0	0	0	0	0	0	0	0	0	0
ACSM3	1.72495	1.04887	0.281784	0.686869	0.541608	0.277895	0.386476	0.360157	0.411197	0.390732	0.553825	0.247303
ACSM4	0.0472646	0.063586	0	0	0	0	0	0	0.108257	0	0	0
ACSM5	0.0170282	0	0	0	0.0688154	0	0	0.0662343	0	0	0	0
ACSS1	0.44998	0	0.0779255	0	0.381633	0	0	0	0	0.186329	0	0
ACSS1	14.0462	10.2799	7.87356	3.90909	20.0576	15.6635	15.3274	4.09323	19.2874	12.0011	12.2536	4.07206
ACSS2	0	0.269131	0	0	0	0	0	0	0	0	0.333129	0
ACSS2	6.15287	4.83873	1.24816	4.31152	3.01653	2.92585	1.2789	2.36572	2.65951	2.0976	0.319263	2.21001
ACSS3	0.027162	0.0182708	0.0285157	0.0361993	0.0548844	0	0	0	0	0	0	0
ACTA1	0.110432	0.0371415	0.14492	0.220762	0.111571	0.292237	0.0851634	0.107387	0.252938	0.13965	0.232089	0
ACTA2	0.950762	0	0	0	0	0	0	0	0	0	0	0
ACTA2	0.578941	0.945369	0.491913	2.43553	3.8818	2.23198	1.66228	4.82996	5.04424	3.79255	1.28016	8.52237
ACTB	594.157	777.311	1854.65	3111.88	1023.41	974.543	1124.43	2986.55	1018.85	862.352	1046.57	3141.01
ACTBL2	0	0.0198336	0	0	0.0595792	0	0.0909548	0.114689	0	0	0	0
ACTC1	0	0	0.0117097	0	0.0450757	0	0	0	0.0510945	0	0	0
ACTG1	313.547	394.027	805.262	1552.53	548.18	479.652	541.478	1755.36	489.848	504.863	600.694	1982.39
ACTG1P4	0.68548	0.530957	0.218074	0.166101	1.17524	0.109939	0.19223	0.242392	0.19031	0.0525361	0	0.151124
ACTG2	0.0682685	0.0918829	0.07173	0	0.276374	0	0.316352	0.798909	0	0	0	0
ACTL10	0.304668	0.327901	1.32206	3.9521	0.492498	0.752496	2.38088	4.18723	1.39565	0.616444	1.28061	2.65987
ACTL6A	7.23227	4.41388	12.7542	30.1954	6.27075	2.58039	8.41109	30.0946	6.29571	2.85908	8.10631	28.7085
ACTL6B	0	0.0361954	0.0564912	0	0	0	0	0	0.123248	0	0	0
ACTL7A	0.0287447	0.0386708	0.0603545	0	0	0.152135	0	0	0	0.0727	0	0
ACTL7B	0.0292759	0	0	0.0780331	0.118312	0.154946	0	0.227748	0.134109	0	0.123055	0
ACTL8	0.0442677	0.0595542	0.023237	0	0	0	0	0	0	0	0	0
ACTL9	0.0579341	0	0	0	0.117064	0.153312	0	0	0	0	0.121757	0
ACTN1	48.2017	52.3349	35.3637	47.4834	15.0144	15.4492	9.41396	19.2787	2.88512	2.68432	1.39618	15.0383
ACTN2	0.0454849	0.07343	0.114604	0.121237	0	0	0.168371	0	0	0.0460155	0.114712	0.0661836
ACTN3	0	0	0	0	0	0.0941927	0.164459	0	0	0	0	0
ACTN3	0.0420534	0.0565434	0	0	0	0.197875	0	0	0	0.177132	0	0
ACTN4	15.9751	16.8202	13.3689	66.6663	89.7147	88.6247	73.46	152.951	130.472	132.863	117.708	217.726
ACTR10	6.46301	4.33605	4.65923	5.35244	4.91005	2.94727	5.15335	5.84173	4.56077	3.41431	6.38363	5.03353
ACTR1A	9.53432	10.5893	16.6022	22.3942	14.0797	12.3688	21.8481	27.6608	16.4194	16.8253	24.4069	31.9185
ACTR1B	35.6272	28.542	49.181	42.5944	47.7719	40.1646	53.1777	33.066	42.2844	36.3104	50.3006	33.4452
ACTR2	38.6808	30.2648	35.1949	49.6051	43.4193	36.7973	43.3153	55.803	52.4886	42.2078	43.0852	52.7217
ACTR3	50.6839	33.1633	110.39	141.532	56.7158	44.1323	84.7561	171.8	62.619	44.9061	91.4849	168.735
ACTR3B	1.43849	1.06388	0.70752	3.99538	1.09475	1.43573	1.01544	3.32112	1.32998	1.26181	0.602637	1.94041
ACTR3BP2	0	0	0.0646398	0	0	0	0	0	0	0	0	0
ACTR3BP5	0.0500804	0	0.0262882	0	0.101194	0	0	0	0	0	0	0
ACTR3C	0	0	0	0	0	0	0	0	0	0	0	0
ACTR3C	0.482735	0.485271	0.162473	0.659248	0.464557	1.25678	0.480734	0.287628	0.585192	1.14753	0.166131	0.52031
ACTR5	4.7688	5.27551	5.52979	9.3007	4.09614	4.13329	5.33063	8.07891	4.41474	3.99234	4.46989	8.70387
ACTR6	0	0.230758	0.182605	0.14634	0	0	0	0	0	0.338987	0.233369	0
ACTR6	6.88058	4.83154	4.44348	4.96773	4.67759	2.98811	4.70504	6.64883	3.59706	2.49845	2.90745	5.0709
ACTR8	3.98514	2.56608	2.20511	6.41566	4.72597	2.82426	3.7825	6.88932	5.09697	3.30226	2.67248	8.09497
ACTRT1	0.0285653	0	0.0299889	0	0	0	0	0	0	0	0	0
ACTRT2	0	0	0	0	0	0	0	0	0	0	0	0
ACTRT3	0	0.13833	0.0647689	0.493326	0.166215	0.217682	0.634368	0.799905	0.0942047	0.260058	1.72879	0.448845
ACVR1	0	1.25703	0	1.31607	0	0	1.23251	0	0	1.32813	0	2.01754
ACVR1	5.56553	6.38373	3.23088	1.39924	8.71657	9.89242	4.72336	5.76124	7.57417	7.68178	6.28511	2.14505
ACVR1B	3.06296	4.37983	3.72144	6.13374	2.95334	2.96571	5.51182	5.12016	2.64494	3.10369	5.03078	6.10504
ACVR1B	0	0	0.281088	0	0	0	0	0.891638	0	0	1.27941	0
ACVR1C	0	0	0	0	0	0	0	0	0	0	0	0
ACVR1C	1.38261	0.910539	0.454518	0.124932	0.749315	0.28478	0.48584	0.0718713	0.678149	0.435638	0.681126	0.0707906
ACVR2A	1.38228	0.842647	0.551376	0.33902	1.48865	0.506845	1.00047	0.554687	1.28011	0.920511	1.19943	0.0595015
ACVR2B	1.69502	1.25711	0.498107	1.44807	1.93206	1.15014	0.826758	1.85959	1.44344	1.22747	0.730734	2.02895
ACVR2B-AS1	0.360034	0.264196	0.0859039	0.0872408	0.33068	0	0.0504823	0.127311	0.224901	0.12417	0.0687875	0.119062
ACVRL1	0.00966247	0	0	0	0	0	0.0298062	0	0	0	0	0
ACVRL1	0.00998331	0	0	0	0	0	0	0	0	0	0	0
ACY1	2.03733	2.20068	1.58374	22.3174	2.751	4.22681	1.46998	16.2175	2.44104	2.05233	1.09484	15.1491
ACY3	0.316855	0.255762	0.0997939	0.337823	0.512198	0.335398	0	0.36974	0.580591	0.160275	0.266367	0.230522
ACYP1	10.9939	6.72542	2.13715	8.86271	11.8927	12.9283	2.86905	12.4935	21.4488	13.1596	1.99618	7.89869
ACYP2	1.78652	2.13135	1.66323	1.70709	3.13313	2.31924	1.45572	0.524455	2.4706	2.81335	2.26695	0.980947
ADA	12.1261	12.624	6.23821	4.72997	18.9065	19.9225	10.7822	8.88954	21.6774	18.8366	9.83226	9.19381
ADAD1	0	0	0	0	0	0	0	0	0	0	0	0
ADAD1	0.0971551	0	0	0	0	0	0	0	0	0	0	0
ADAD2	0.178726	0.216409	0.0375191	0.105708	0.288611	0	0	0	0	0.151263	0.0751468	0
ADAL	1.58024	0.933579	1.00056	1.24969	0.808154	0.536255	0.506218	1.26691	0.480937	0.617241	0.246355	0.953154
ADAM1	4.20614	1.65855	1.99471	3.01543	1.75843	1.22822	1.56593	2.31305	1.92679	0.770338	1.5241	1.16073
ADAM10	17.2652	11.5572	4.26163	9.86931	15.769	9.65968	5.95359	12.3623	18.2109	11.5931	5.81977	11.5995
ADAM11	0.308793	0.239184	0.0785898	0.0249415	0.151263	0.09905	0	0.0727946	0.214325	0.118331	0.0393317	0.068078
ADAM12	0.0947006	0.0819029	0.0709021	0.089844	1.72229	1.50574	0.906405	1.39866	3.16081	2.44658	1.81124	2.50961
ADAM15	4.50125	4.48703	2.15135	24.5821	12.3695	16.7391	7.49849	27.2486	17.6115	16.54	8.23506	31.0543
ADAM17	4.6953	4.53865	13.729	8.15796	4.91944	4.78601	22.7091	10.6874	4.93903	4.89668	32.3081	11.2179
ADAM18	0.0456564	0.153292	0	0	0	0	0	0	0	0	0	0
ADAM19	3.20326	3.95884	15.5668	4.52316	33.5446	45.4788	123.868	19.2087	47.3987	64.1213	180.405	22.7037
ADAM2	0.0623636	0.0419494	0.0327358	0	0	0	0	0	0	0	0	0
ADAM20	0.162286	0.0992392	0.0619542	0.039324	0	0	0.04551	0.0573857	0.0675831	0	0	0.107335
ADAM20P1	0.176378	0.0730108	0.0284875	0	0.0548302	0	0	0	0.124303	0.102944	0	0.0987086
ADAM21	0	0.0208015	0	0	0	0	0	0	0	0	0.0649918	0
ADAM21P1	0.020103	0	0	0	0	0	0	0	0	0	0	0
ADAM22	0.415942	0.318134	0.153068	0.227358	0.39608	1.07558	0.137321	0.342422	0.533286	0.35813	0.0720569	0.258081
ADAM23	0.513201	0.199858	0.0850702	0.0719951	3.38387	2.78766	1.16649	0.157594	2.90771	2.59594	0.6812	0.196511
ADAM28	0.088916	0	0.0615222	0	0	0	0	0	0	0	0	0
ADAM29	0	0	0	0	0	0	0	0	0	0	0	0
ADAM30	0.0137671	0.0555634	0.0144532	0	0	0	0	0	0	0	0	0
ADAM32	0.0604197	0.0406419	0.0634309	0	0	0	0	0.0587535	0	0	0	0
ADAM33	0	0	0	0	0	0	0	0	0	0	0	0
ADAM3A	0	0.092608	0.054208	0	0	0	0	0	0.156705	0	0	0
ADAM5P	0.0724771	0.162508	0	0	0	0	0	0	0	0	0.101547	0
ADAM6	0	0	0	0	0	0	0	0	0	0	0	0
ADAM7	0.0485172	0.0489533	0	0	0	0	0.0748315	0	0.055563	0	0	0
ADAM8	16.2667	15.9431	22.6961	11.7694	67.0193	85.992	88.6172	35.5159	91.8886	90.0337	110.343	47.0808
ADAM9	0.366636	0.291229	0.279343	1.00004	0.334659	0.274795	0.609613	1.75506	0.38544	0.50697	0.524583	1.41163
ADAMDEC1	0.087285	0	0	0	0	0	0	0	0	0	0	0
ADAMTS1	0	0	0.00929779	0.0236062	0	0	0	0.0688974	0	0	0	0.0644333
ADAMTS10	9.54677	10.9732	4.39891	0.207302	10.3328	13.3779	5.03817	0.264703	8.5506	7.15509	3.3508	0.212187
ADAMTS12	0.0166294	0.0111859	0.0174582	0	0.033602	0	0	0	0	0	0	0
ADAMTS13	0.0542511	0	0.0391747	0.0523494	0	0.211795	0.203878	0.10782	0.277723	0	0	0
ADAMTS13	0.434532	0.38984	0.16008	0.0323089	0.319753	0.330712	0.293518	0	0.185806	0.231418	0	0.126205
ADAMTS14	0	0	0	0	0	0	0	0	0	0	0	0
ADAMTS15	0.0217712	0.0292892	0.00761875	0	0.0293278	0	0	0	0.0332438	0	0	0
ADAMTS16	0.0414064	0.0779868	0	0.0220733	0.0334669	0.131489	0	0	0.151743	0.0209447	0	0
ADAMTS17	1.42487	1.54928	0.887968	0.728366	1.65649	1.61845	1.06372	0.455532	0.745112	1.0696	0.71104	0.473352
ADAMTS18	0.0626958	0.037487	0.0146268	0.018568	0.0563046	0.0368694	0	0.0270964	0.0319114	0	0	0
ADAMTS19	0.056659	0.0653353	0.00849755	0	0.0327106	0	0	0	0	0	0	0
ADAMTS2	0.0395133	0.0252132	0.00685214	0.0162559	0.0491628	0	0	0	0.206674	0.101762	0	0
ADAMTS20	0.0359246	0.057996	0.007543	0	0	0	0.0443272	0	0.0329133	0	0	0
ADAMTS3	0.0424505	0.038073	0.00742769	0.0188582	0.0285923	0	0	0.0275199	0	0	0	0
ADAMTS4	0.256731	0.217465	0.0598948	0.27879	0.34584	0.10065	0.0293314	0.258898	0.0871154	0.264536	0.0399673	0.069178
ADAMTS5	0.0596787	0.0860217	0.00447522	0.0227243	0.017227	0	0	0	0.0390546	0	0	0
ADAMTS6	0.719768	0.701458	0.130898	0.0604252	0.274845	0.149979	0.122378	0.0661341	0.0778861	0.0430018	0.095288	0.0412327
ADAMTS7	0.0225088	0.0100938	0	0	0.0303214	0	0	0	0	0	0	0.0545864
ADAMTS8	0.0787163	0.121027	0.0708338	0.119894	0.227224	0.357099	0.173442	0.0874807	0.206052	0.170645	0.0945336	0
ADAMTS9	0.0281668	0.0606293	0.0177424	0.0450462	0.0227659	0	0.0695098	0	0.0774174	0	0.0236786	0
ADAMTS9-AS2	0.0369759	0.0248722	0.058228	0	0.0747147	0	0	0	0	0	0	0
ADAMTSL1	0.0105053	0.0141329	0.00551441	0.0140006	0.0636819	0	0	0	0	0	0	0
ADAMTSL2	0	0	0	0	0.0409205	0.0535912	0	0	0	0	0	0
ADAMTSL2	0.961168	0.817867	0.777575	0	0.0446764	0.0585102	0.13639	0	0	0	0	0
ADAMTSL3	0.0224628	0.0453294	0.0294779	0.0149683	0	0	0.0173229	0	0	0	0	0
ADAMTSL4	0.686085	1.27788	2.55644	0.545509	0.911329	2.28328	2.75218	0.610112	1.34679	3.34777	3.62826	0.641814
ADAMTSL5	3.53232	4.05382	0.756808	2.92063	3.08807	3.58643	0.355797	2.97225	1.91532	2.1514	0.42421	2.51743
ADAP1	2.67866	2.57745	1.75062	40.7112	5.01831	8.1683	3.55691	56.65	8.53259	7.31317	5.51776	71.2416
ADAP2	0.449521	0.342691	0.0157308	0.0798782	0.605545	0.0793048	0.138666	0	0.205921	0.227382	0	0
ADAR	2.42065	1.8135	4.34212	2.72661	1.10696	0.480567	2.81068	2.23429	0	0.656425	3.32798	5.10368
ADAR	37.1809	34.8552	34.8233	34.4418	46.0215	33.794	37.7311	42.1949	34.4488	32.3735	35.2488	49.698
ADAR	16.9016	16.9679	31.441	49.1997	10.6511	7.45354	23.3865	46.5219	15.4508	8.76033	18.7906	36.6581
ADARB1	9.95956	8.20522	6.11849	13.871	13.4438	12.3348	7.41944	9.41345	17.7953	14.6953	10.3408	10.8911
ADARB2	0.00488857	0.00657669	0.0205289	0	0.019756	0	0	0	0	0.012364	0.0205481	0
ADARB2-AS1	0	0	0	0	0	0	0	0	0	0	0	0
ADAT1	5.9955	4.14585	3.34233	3.74706	6.6203	4.36499	4.47991	3.34386	4.52372	3.49671	5.07926	2.53487
ADAT2	2.72719	1.54202	1.69435	4.3018	1.22459	0.662429	0.8941	3.331	0.573349	0.683087	0.581465	2.63591
ADAT3	0.903728	3.22423	3.85975	9.10092	2.89103	9.01295	7.092	8.68482	1.91846	6.61942	6.59732	10.9319
ADC	1.62348	0.965068	0.237822	0.100635	2.13612	1.19895	0.407629	0.146857	2.24839	1.52783	0.47609	0.274683
ADCK1	1.93795	1.75511	0.617566	5.26421	1.56831	1.26766	0.696959	4.14438	1.13332	0.895761	0.169966	2.23105
ADCK2	5.62806	7.14959	5.39636	10.3569	6.47831	6.45543	7.52493	8.81079	8.22135	7.18324	7.61691	8.49344
ADCK3	12.8617	15.5026	9.18418	14.9069	9.96282	10.2891	8.51727	13.9728	11.0995	11.2231	5.50679	13.2211
ADCK4	1.09233	0.799204	1.04403	1.17761	0	0	0.686214	0	4.66339	0	0	4.51674
ADCK4	8.00848	6.10348	3.89256	4.07819	11.174	11.5109	7.11484	5.90013	9.40122	7.33393	6.94453	0.702372
ADCK5	4.93621	4.64325	1.92498	7.05449	6.45145	5.00276	2.98059	5.55585	6.15823	3.68109	1.50094	6.41842
ADCY1	0.0230707	0.0532071	0.0138403	0	0.093235	0	0	0.0384592	0	0.0166713	0	0.0479563
ADCY10	0.0662731	0.0222574	0.00797713	0	0.0667763	0	0	0	0	0	0	0
ADCY10P1	3.65807	2.56162	0.76924	0.241628	2.1422	0.812189	0.724155	0.175335	1.16161	0.731318	0.417946	0.330083
ADCY2	0.0125717	0.0169129	0.0131982	0	0.0254028	0	0	0.02445	0.0575895	0	0	0
ADCY3	4.9145	5.00981	1.73273	14.8724	12.8527	11.4849	5.8444	19.0785	13.2542	12.2326	6.51472	19.3819
ADCY4	0.675251	0.649952	0.278203	0	1.02224	0.955836	0.594237	0	0.606459	0.641181	0.252545	0
ADCY5	0.0603032	0.0216339	0.0590881	0	0.129974	0	0.0248026	0	0.0736647	0	0	0
ADCY5	0.0506614	0.0181749	0.0496406	0.0539058	0.109193	0	0.020837	0	0.0618865	0.0511497	0	0
ADCY6	0.0501401	0	0.0262702	0	0	0	0	0	0	0	0	0
ADCY6	0	0.0467203	0	0	0	0	0.0412363	0.0817668	0	0	0	0
ADCY7	31.9906	27.0846	9.60978	11.1438	39.3244	39.3183	22.0675	16.8626	38.2118	32.2313	17.2913	20.75
ADCY8	0.0100442	0.0135126	0.0105448	0	0.0811824	0	0	0	0.0460112	0	0	0
ADCY9	1.44998	1.3913	0.62121	0.923582	5.62278	6.26349	2.03907	1.90764	6.69103	6.55248	2.06144	2.36579
ADCYAP1	0.0129247	0	0	0	0	0	0	0	0	0	0	0
ADCYAP1	0.0130393	0	0	0	0	0	0	0	0	0	0	0
ADCYAP1R1	0	0	0.0192013	0	0.0516501	0	0	0	0	0	0	0
ADD1	53.8172	46.5428	27.6032	42.3698	69.8402	58.2228	33.2267	42.8929	70.9535	61.3587	34.1199	49.2908
ADD2	0	0	0	0	0	0	0	0.0619674	0	0	0	0
ADD2	2.25694	1.83762	0.604212	2.83849	0.458718	0.166795	0.0682964	0.103496	0	0.0483083	0	0.160997
ADD3	0	0	0	0	0	0	0	0	0	0	0	0
ADD3	88.3364	57.935	23.4594	4.46231	66.2457	37.3496	22.1281	4.46521	54.7453	36.5549	17.8733	3.39546
ADGB	0	0.0209549	0.00817622	0	0.0314737	0	0.0240242	0.0302932	0.0356763	0	0	0
ADH1A	0	0	0	0	0	0	0	0	0	0	0	0
ADH1B	0.0153584	0.0413238	0	0	0	0	0	0	0	0	0	0
ADH1C	0	0	0	0	0	0	0	0	0	0	0	0
ADH4	0.0208141	0	0	0	0	0	0	0	0	0	0	0
ADH5	5.33007	4.36109	2.55243	6.06497	5.03865	3.46439	3.46144	6.66829	3.85523	2.52269	2.3583	5.10237
ADH6	0.110294	0.157688	0.0308886	0	0	0	0	0	0.0673179	0	0	0
ADH7	0	0	0	0	0	0	0	0	0	0	0	0
ADH7	0	0.0484187	0	0	0	0	0	0	0	0	0	0
ADHFE1	5.76024	3.80157	1.34638	0.115876	9.04793	5.9823	2.01156	0.338197	6.27314	4.89284	2.01005	0
ADI1	11.7478	13.6554	10.6046	19.7181	14.799	17.5604	11.8269	17.3031	17.6758	16.0993	8.36766	10.192
ADIG	0	0	0	0	0	0	0	0	0	0	0	0
ADIPOQ	0.0449325	0	0	0	0.0359612	0	0	0	0	0	0	0
ADIPOQ-AS1	0	0.0160997	0.0125636	0	0	0	0	0	0	0	0	0
ADIPOR1	16.6805	26.3111	40.3208	55.628	25.3639	26.627	33.7197	58.4894	25.3254	30.2489	31.8412	50.9792
ADIPOR1	2.38522	3.2372	1.89039	0	2.00249	1.77767	1.00356	0	1.42594	2.91185	0	0
ADIPOR2	5.72416	4.89163	15.8034	21.6539	5.8357	4.6186	13.5556	22.4673	6.80529	5.7016	11.8337	21.9185
ADK	1.07348	0.734922	0.712421	3.78338	2.39617	0.905174	0	6.93155	2.90035	1.63855	0.613539	4.75027
ADK	3.69734	3.54043	2.05403	14.3538	4.42132	4.92706	3.45458	9.17847	3.69808	3.52714	2.45795	7.60128
ADM	0	0.0382437	0.179064	0	0	0.150455	1.05229	0.221147	0.390667	0.934664	0.836417	0.206818
ADM2	0.733929	0.459982	6.48166	15.339	0.367872	1.58156	1.87488	9.42003	0.738306	0.757965	1.4169	8.36233
ADM2	0.0369331	0.337155	0	0	0.683571	0	0.250534	0	0	0	0	0
ADNP	18.3374	14.4965	19.0374	17.3242	10.5617	6.8518	17.9596	16.1585	9.19086	9.71811	16.0521	13.3512
ADNP2	7.417	16.2429	17.3634	12.249	8.2506	13.274	16.6761	9.42826	7.14557	12.7444	14.3666	9.23459
ADO	3.93771	8.52656	47.3664	29.4824	5.00645	10.4789	42.7186	28.3527	5.72562	12.7566	42.7731	28.8091
ADORA1	0	0	0	0	0	0.157375	0.137332	0	0.135961	0.0713672	0	0
ADORA2A	9.22621	11.8438	102.648	21.9064	11.4812	13.1496	25.3625	18.3329	10.2346	11.1059	17.7069	18.2041
ADORA2B	0.0218521	0.0881939	0.734116	0.524208	0.08831	0.115655	0.269631	0.254993	0.100102	0.0552674	0.367402	0.158981
ADORA3	0.0183479	0	0.0192624	0.0489054	0.074149	0	0	0	0	0	0	0
ADORA3	0	0	0	0	0	0	0	0	0	0	0	0
ADPGK	16.9103	16.4109	20.2384	25.4802	17.1518	13.628	20.2254	31.0596	15.7605	13.8294	19.5533	31.2183
ADPGK-AS1	1.08947	0.662468	0.662837	0.572613	0.805355	0.67624	0.455978	0.810947	0.773527	0.70671	0.4744	0.659649
ADPRH	0.0718659	0.112796	0.062873	0.319257	0.484049	0.570538	0.923698	0.792019	1.31684	0.605868	1.1076	1.4814
ADPRHL1	0.181009	0.204638	0.115392	0.119837	0.354823	0	0	0	0	0.136269	0	0
ADPRHL1	0	0	0	0.190397	0	0	0.223093	0.281012	0.220797	0.216996	0.304141	0.175765
ADPRHL2	7.45386	19.2036	20.9699	29.9965	10.8286	18.8228	25.3226	25.3928	9.5964	12.9377	24.5731	21.6209
ADPRM	18.3433	10.8056	4.15918	2.31447	5.92166	2.7287	1.8415	2.21649	3.8534	3.08831	2.05302	2.17159
ADRA1A	0	0.0480499	0	0	0	0	0	0	0	0	0	0
ADRA1B	0.0182747	0	0.0191855	0.0974202	0	0	0	0.0710829	0	0	0	0.132954
ADRA1D	0.0309011	0	0.0162206	0	0	0	0	0	0	0	0.0649431	0.112408
ADRA2A	0	0.0143081	0.0111655	0	0.0429807	0	0.0328076	0.0413687	0	0	0	0
ADRA2B	0.0378363	0.390248	0.675274	0.168084	0.152907	1.06802	2.91788	0.0490572	0.231099	2.36046	3.33978	0
ADRA2C	0.0210373	0.0849058	0.0441716	0	0	0	0	0	0	0.0532069	0	0
ADRB1	0.0719621	0.212986	0.0302194	0.0383622	0.116327	0	0	0	0.0659301	0.109202	0	0
ADRB2	0.322751	0.651305	0.105886	0	2.77169	2.5623	0.808927	0	3.88103	3.9284	1.01746	0.293515
ADRB3	0.046702	0.020943	0.0326863	0.0414938	0	0	0	0.0605521	0	0	0	0
ADRBK1	86.6042	98.0546	43.8091	90.6968	152.109	188.574	91.7929	78.5287	162.941	144.955	67.9683	76.5731
ADRBK2	0.655055	0.452868	0.181477	2.74027	0.183837	0.0963044	0.0701622	0.990875	0.0833538	0.0575257	0.0764829	0.430241
ADRM1	23.8398	33.81	93.3462	290.524	52.7989	61.3005	103.426	261.915	53.5949	66.4579	105.389	298.398
ADSL	27.2603	21.0523	29.407	88.6247	30.0851	18.0518	27.271	87.4289	25.9561	19.7875	22.764	72.6993
ADSS	10.7938	9.30226	14.425	17.2858	10.232	7.75805	16.5795	17.7959	10.4452	8.65038	14.9364	10.5566
ADSSL1	1.64272	1.54708	0.295571	0.500429	1.32785	0.869166	0.217039	0.0912939	1.07508	0.474726	0.19723	0.170757
ADSSL1	0	0	0	0	0	0	0	0	0	0	0	0.165386
ADTRP	12.9919	8.44716	8.05413	7.12032	3.50573	2.77825	3.66203	5.23935	1.2545	1.15453	1.63094	3.81927
AEBP1	10.5072	9.00276	15.5662	65.7787	2.61057	2.99155	3.30036	15.1544	1.06344	0.459501	1.23034	7.49014
AEBP2	8.38083	8.56492	19.2266	21.5046	15.1598	21.5713	26.5791	23.399	16.7268	14.5985	26.2262	21.5437
AEBP2	0.223368	0.328525	0.476973	0.0909008	0.160175	0.0718187	0.193412	0.17866	0.286943	0.247112	0.371277	0
AEN	10.4696	12.769	80.7981	57.1513	14.2638	15.1823	53.6229	47.9737	13.6251	14.9782	50.6746	46.1637
AES	449.971	593.602	231.525	149.433	769.874	991.692	329.163	168.059	876.051	916.879	309.75	203.043
AES	5.78493	5.49785	3.3953	7.55399	8.66071	10.1246	1.76103	14.1176	16.5322	10.8626	2.41065	10.9125
AFAP1	3.61378	3.06609	7.8914	5.7346	4.69035	5.10062	13.2976	11.6781	4.69169	4.7029	17.3732	13.2728
AFAP1-AS1	0.0387891	0	0.0554414	0.0209391	0.0524029	0	0.109504	0	0.028854	0.0191538	0.201926	0
AFAP1L1	0.0684157	0.0948261	0	0	0	0	0	0	0	0	0	0
AFAP1L2	0.373522	0.348963	0.0326782	0.0829668	0.503168	0.604057	0.16003	0.100895	0.855533	0.341141	0	0
AFF1	7.53983	5.09448	3.61153	1.20598	17.8413	8.97249	5.19748	1.772	14.7603	10.9201	5.36546	2.77588
AFF1	6.34365	5.48894	2.56259	2.17383	3.52978	3.51481	6.42503	5.60911	3.8636	3.7445	6.93432	6.35898
AFF2	0.138804	0.0730264	0.0219973	0.313586	0	0.0550343	0	0.105443	0	0	0	0
AFF2	0	0	0	0	0.05408	0	0	0	0	0	0	0
AFF3	0.202687	0	0	0.419017	0.328009	0.375878	0.0860654	0.0789265	0.162666	0.186034	0.0533061	0.0553595
AFF3	0.997478	1.73636	0.441059	0	0.327323	0.375092	0.0858856	0.0787616	0.162326	0.185645	0.0531947	0.0552438
AFF4	16.1927	14.5711	18.2862	8.09118	11.2077	10.2405	17.0435	8.5295	10.0452	9.99379	14.9282	7.85172
AFG3L1P	5.89511	4.25178	5.79102	10.3738	6.14114	4.803	5.73752	8.75903	4.67	4.83263	5.47132	10.8114
AFG3L2	7.3551	6.85567	12.5191	25.4552	5.96554	5.16319	10.7305	24.0656	5.99769	5.74624	8.9024	17.1832
AFM	0.0206265	0.0554984	0.0216545	0	0	0	0	0	0	0	0	0
AFMID	0.710471	0.255146	0.193448	3.16393	0.670661	0.37312	0.146263	4.11545	0.792323	0.650235	0	4.52101
AFP	0	0	0	0	0	0	0	0	0	0	0	0
AFTPH	16.1199	7.20048	29.7122	12.9909	11.4613	7.59815	22.6919	14.1676	15.048	6.52782	20.1373	13.5079
AGA	5.29832	3.73399	2.8438	7.9012	5.45348	4.19594	2.7373	7.03747	5.4988	5.27633	2.1938	8.74938
AGAP1	0.223327	0.242066	0.096259	0.14357	2.2854	2.56979	0.634087	0.823892	3.8738	3.89683	0.890337	0.771517
AGAP11	0.0797309	0.0552485	0	0.0347995	0.0614138	0	0	0	0	0.0335158	0	0
AGAP2	1.36979	1.16368	0.482467	0.906031	2.23223	3.72626	0.962596	1.27957	2.61457	1.98473	1.23598	0.895307
AGAP2	16.15	14.0788	4.17965	18.2789	31.3407	27.3185	11.8812	21.0182	37.8668	24.2822	8.20477	23.4731
AGAP3	8.13681	8.16244	3.6171	10.7459	12.809	17.0268	7.16642	12.8555	13.9153	10.1319	4.46209	10.6747
AGAP4	0.254162	0.205157	0.106731	0.316145	0.0684757	0.269036	0.0522681	0	0.310476	0.214272	0.071221	0.123274
AGAP5	0.288644	0.114211	0.267379	0.633593	0.548935	0.179727	0.157128	0.726476	0.0777791	0	0.428207	1.11175
AGAP6	2.2884	1.75921	3.65047	3.0894	1.92167	1.1797	2.24608	2.71659	0.816849	1.20264	2.9356	3.02706
AGAP7	0.187232	0.183191	0.0536083	0.0453688	0.206361	0.270259	0.0525057	0.066207	0.155944	0.0430492	0	0
AGAP8	0.15319	0.183191	0.0357389	0.0453688	0.206361	0.180173	0	0.066207	0.0779719	0.129148	0.143089	0
AGAP9	0	0	0.0181165	0	0	0	0	0	0	0	0	0
AGAP9	0	0	0	0	0	0	0	0	0	0	0	0
AGBL1	0.0353774	0.0317293	0.0247604	0	0	0.0624131	0	0	0	0	0	0
AGBL2	1.36425	0.817424	0.168499	0.0611147	0.509632	0.364056	0.212186	0.0445925	0.630199	0.11598	0.144563	0
AGBL3	0.279815	0.21959	0.0856802	0.186458	0.329819	0.370239	0.0719297	0.0906996	0.106817	0.11795	0.24503	0.169646
AGBL4	0	0.0185459	0.0289451	0.0367445	0	0	0	0	0	0	0	0
AGBL5	4.90179	4.57206	2.21795	3.28045	6.45839	4.4961	2.05553	2.0713	6.26884	5.35016	2.5083	2.27089
AGER	16.2446	8.62432	5.80082	5.06945	15.0182	9.5607	4.84279	5.32778	17.637	9.83891	6.29196	3.58592
AGFG1	8.0515	6.9485	17.8284	30.818	6.57686	5.33324	17.2192	27.5789	5.46107	5.66565	13.6277	22.5762
AGFG2	5.06862	5.72466	1.44716	13.7612	12.9753	14.9538	4.62194	18.2834	16.0806	10.9788	3.27491	19.0609
AGGF1	6.88955	4.81871	3.54931	8.74346	4.91122	3.33687	3.4951	9.1697	4.72986	2.77318	2.72689	8.30965
AGK	7.21021	5.32365	4.67183	14.9018	5.06507	2.38506	3.30149	23.1156	3.67708	3.31236	3.78832	18.6467
AGL	2.09906	2.55573	1.85316	4.18184	2.4389	1.06467	1.77364	4.27978	1.92338	1.33194	1.02164	3.29469
AGL	0.574328	0	0	0	0	0	0	0	0.148292	0	0.169522	0
AGL	0.803277	0	0.102438	0.109207	0	0	0	0	0	0.0400057	0	0.286222
AGL	0.437032	0	0	0	0	0	0	0	0	0	0	0
AGMAT	4.93327	3.57432	1.81776	12.5318	3.02527	2.79203	1.2086	9.75346	2.03409	1.84972	1.20769	7.60125
AGMO	0.0665715	0.02239	0	0	0.134517	0	0.102678	0	0	0	0.0699548	0
AGPAT1	18.2226	19.5432	8.37456	19.8754	26.3415	24.3413	10.224	20.2973	30.8303	26.3919	9.70818	21.3713
AGPAT1	0.665138	0	0	0	0	0	0	0	0	0	0.588403	0
AGPAT2	3.05966	3.72218	1.65851	6.62464	7.09429	16.0105	4.89896	5.28989	9.87173	11.0358	4.50091	7.45095
AGPAT3	10.891	10.2543	14.9225	31.7902	15.337	13.7686	12.6575	27.3509	13.7586	13.5405	11.0403	25.6467
AGPAT3	0.600707	0	0	0	0	0	0	0	0	0	0	0
AGPAT4	0.998541	0.81586	2.92538	0.278697	3.71846	3.099	7.96669	0.488044	4.14313	3.79482	7.9768	0.798739
AGPAT4-IT1	0.534083	0.44907	2.03254	0.296576	1.25905	1.17779	5.42304	0.346236	1.32523	1.12565	5.79934	0.647605
AGPAT5	1.08967	1.43583	6.79336	11.2796	1.26681	1.14554	3.77577	11.2639	1.19663	1.07596	2.41559	8.14493
AGPAT6	10.4185	11.2938	17.2702	15.9904	14.536	13.9581	19.1905	16.7331	12.4997	12.944	18.5486	18.3322
AGPAT9	0	0	0.432105	0	0.315872	0.413679	0	0	0	0	0	0
AGPAT9	0.751136	0.550174	0.89832	0	0.316352	0.414308	1.15098	0	1.36139	0.785629	1.96083	2.84629
AGPAT9	0	0.588541	0.519988	1.58826	0.306226	0.401047	1.95522	2.35728	0	0.84899	3.13342	0
AGPHD1	1.99086	1.67296	0.215026	0.218373	0.827728	0.433611	0.205605	0	0.562952	0.207209	0	0
AGPS	3.64889	2.4147	2.47109	9.31052	3.08388	2.27537	3.29885	10.2424	3.00332	2.22901	3.56893	8.99233
AGR2	0	0.0563735	0	0	0	0	0	0	0	0	0	0
AGR3	0	0.0738869	0	0	0	0	0	0	0	0	0	0
AGRN	1.86108	2.29195	4.77538	17.7742	0.818007	1.22009	1.78646	5.66437	0.51513	0.654141	1.22894	3.39522
AGRP	0.269575	0.217599	0.0566021	0.718538	0.217885	0	0	0.209713	0.493958	0	0.226621	0
AGSK1	0	0	0	0	0	0	0	0	0	0	0	0
AGSK1	0.031314	0	0	0	0	0	0	0	0	0	0	0
AGSK1	0	0	0	0	0	0	0	0	0	0	0	0
AGT	0	0.0429409	0	0	0.128992	0	0	0	0	0	0	0.11611
AGTPBP1	9.33069	6.74663	4.18838	2.80755	7.68471	3.0094	5.52076	3.37193	7.00283	4.10209	3.95722	3.3908
AGTR1	0	0	0	0	0	0	0	0	0	0	0	0
AGTR1	0	0	0	0	0	0	0	0	0	0	0	0
AGTR2	0	0	0	0	0.0574213	0	0	0	0	0	0	0
AGTRAP	10.8667	10.3424	1.85561	5.98832	14.026	10.8362	1.4652	3.55354	13.5681	13.2653	0.885389	4.68185
AGXT	0	0.0346778	0	0	0.10417	0	0	0	0	0	0	0
AGXT2	0.0171202	0.0460642	0	0	0	0	0	0	0	0	0	0
AGXT2L1	0	0	0	0	0	0	0	0	0	0	0	0
AGXT2L2	38.6947	33.1445	17.1215	16.0353	42.5051	35.7392	23.5444	13.3716	43.4938	30.6379	19.6103	17.2691
AHCTF1	2.93984	3.01763	2.89095	2.93849	2.08297	1.79338	2.79714	3.23004	1.31173	2.01575	2.56769	2.22216
AHCY	7.89437	9.28973	14.2251	94.7802	7.91848	7.20813	10.3619	75.1369	7.01004	8.2131	11.2173	58.7542
AHCY	0	0	0	0.128303	0	0	0	0	0	0	0	0.543807
AHCYL1	11.1413	6.75248	8.54175	24.6294	14.48	11.8375	9.05396	21.3018	13.6915	8.5372	8.51813	20.1396
AHCYL1	0	0	0	0	0	0	0	0	0	0	0	0
AHCYL1	0.0616338	0.0456548	0.0372275	0.132901	0	0	0.0953138	0	0	0	0	0
AHCYL2	3.97516	2.66757	0.425302	1.59773	3.12275	2.88454	0.702506	2.49958	3.50266	2.31451	0.854649	1.77515
AHCYL2	0.181632	0.153746	0.0528807	0.0589382	0	0	0	0	0	0	0	0
AHCYL2	0	0.227539	0	0.0802361	0	0	0	0	0	0	0	0
AHDC1	5.78933	4.65774	1.92388	2.77186	6.71393	4.93339	3.99031	3.08307	5.0833	4.90745	4.13122	3.0909
AHI1	1.36946	1.4276	4.128	4.18069	1.02593	0.610807	3.24068	4.44199	0.731641	0.982054	3.1151	3.01848
AHNAK	60.817	51.1367	50.9444	1.12038	187.788	153.98	129.63	4.53028	226.435	195.993	132.444	9.30173
AHNAK2	0.00674638	0.0151267	0	0	0.0272639	0.011902	0.0138739	0	0.0103015	0.0113751	0	0.0163607
AHR	5.12993	13.102	54.4029	22.0218	11.2184	22.2301	121.328	18.4407	14.3475	32.4194	149.22	19.2846
AHRR	0.104273	0.0997577	0.170379	7.33779	0.567313	0.626279	0.733398	6.73193	1.55363	1.92184	3.12792	10.8592
AHSA1	23.9203	14.8038	58.8119	275.344	30.9148	25.2268	60.9906	243.421	27.4951	23.9612	58.2486	207.207
AHSA2	33.0941	22.1072	9.21484	5.86816	25.1469	15.608	10.4899	5.834	21.8631	13.9891	10.3077	3.69204
AHSG	0	0.035229	0.0274914	0.139596	0.211652	0	0	0	0	0	0	0.190514
AHSP	0	0	0	0.216981	0	0	0	0	0.372909	0	0	0
AICDA	0.0294854	0.0595009	0.0309549	0	0.0595792	0	0	0	0	0	0.0619679	0
AIDA	0.822178	0.64522	0.359648	0.547867	0.996793	1.01534	0.591781	0.692905	1.50652	0.901083	0.23039	0.598162
AIF1	0.117098	0.070031	0.0869492	0.174231	0.284225	0	0	0	0.180887	0	0	0
AIF1	0	0	0	0	0.987734	0	0	0	0	0	0	0
AIF1	19.7161	16.6024	9.59321	8.72383	1.81886	2.60041	0.618818	1.42076	0	1.03544	0	0
AIF1L	0.0357464	0.0973663	0.172149	0.586408	0.193979	0	0.150364	0.789218	0	0	0.0986192	0.349212
AIFM1	0	0	0.186729	0	0	0	0	0	0	0	0.318631	0
AIFM1	8.03181	5.71434	4.7513	23.3744	9.35284	6.85634	4.32098	22.7567	10.2066	6.01595	3.31397	21.6838
AIFM2	1.53688	1.04058	0.239616	6.15122	2.15223	1.2751	0.195573	6.4118	1.62641	1.34694	0.213192	4.70483
AIFM3	0	0	0	0	0	0	0	0	0	0	0	0
AIFM3	0.107261	0.0479285	0.0561863	0.141968	0	0	0	0.138539	0.162515	0	0	0
AIG1	2.82538	4.32118	2.0295	4.67708	3.36535	3.62037	2.47706	2.19798	4.63215	3.23444	1.62512	1.731
AIM1	11.8577	19.5773	25.2467	4.75399	12.0572	14.6937	39.1859	13.0901	11.4435	19.9198	43.6055	14.603
AIM1L	0.29843	0.211307	0.354527	0.0209328	0.69823	0.540346	0.557191	0.0610947	0.467683	0.456839	0.726223	0.228545
AIM2	0.138784	0.224051	0.815925	4.95694	0.897382	0.587625	12.6721	50.7438	1.52581	0.842418	15.1671	48.2637
AIMP1	2.79894	0	0	0	0	0	5.72493	0	0	0	3.95966	3.30978
AIMP1	0.263748	2.53248	1.23229	1.10857	1.71378	1.57187	1.39544	0.0973224	0	2.23792	1.45626	1.60664
AIMP1	10.6771	8.9105	12.9393	11.8059	7.95543	4.9142	4.58768	15.8251	7.61502	4.9942	5.32299	8.03205
AIMP2	2.82586	2.10808	13.3421	41.5553	4.81208	2.05729	8.45649	43.876	5.2441	3.99988	8.93737	37.7665
AIP	55.3224	75.9543	37.1415	126.711	71.419	90.3508	52.6599	123.707	73.4568	71.3115	32.2967	129.059
AIPL1	0	0.138167	0	0	0	0	0	0	0	0	0	0
AIRE	0.107502	0.024104	0.0188099	0	0.289629	0.474139	0	0	3.11888	1.99386	0.451861	0
AIRN	0.00941727	0.0741637	0.0296598	0.0502023	0.114173	0.099684	0	0.0366303	0.0431395	0.0476356	0	0.0685138
AJAP1	0.70457	0.85883	0.147134	0	0	0	0.0434704	0	0	0	0	0
AJUBA	0	0.0764521	0	0	0	0	0.140823	0	0	0	0	0
AJUBA	0.330732	0.229146	0.378034	0.648494	0.471992	0.154432	0.161675	0.454059	0.312108	0.221482	0.44985	0.354063
AK1	12.0338	11.8607	6.5076	0.969043	19.8347	19.6266	10.4859	1.41413	19.2356	14.8959	10.0093	1.71925
AK2	10.4428	7.24359	11.673	40.6555	8.49243	7.79024	9.15443	43.5299	11.4667	7.20637	8.50408	40.0748
AK3	0.963282	0.178728	0.0990811	0	0	0.118352	0.253648	0.280921	0.373081	0	0	0
AK3	6.2261	5.20064	1.55272	4.77891	5.60651	4.77156	1.87419	3.33946	4.72578	4.18765	2.02541	3.47742
AK3	0	0	0.0834551	0	0	0	0	0.228822	0	0	0	0
AK3	0	0	0	0.0692301	0	0	0	0	0	0	0	0
AK4	0.0139557	0	0	0.109871	0	0	0	0	0	0	0	0
AK4	0.0137343	0.00791872	0	0.133868	0	0	0	0.103405	0	0	0.0742121	0.385276
AK4	0.0139678	0	0	0.152786	0	0	0	0.40698	0	0	0	0
AK5	10.4836	9.21633	1.476	0.792414	2.05487	2.68815	0.573069	0	1.44694	1.14355	0.0520716	0
AK5	0.128192	0	0	0	0.0827069	0	0	0	0	0	0.0439884	0
AK7	0.0873751	0.100755	0.0262085	0.0332705	0	0	0.0385042	0	0.0571794	0	0.0524661	0
AK8	0.0586768	0.131565	0.0205337	0.104266	0.237129	0	0.120668	0.0760783	0.179195	0.0989355	0	0
AKAP1	7.21681	6.88809	17.7139	27.148	7.30184	7.40231	13.9994	24.1495	7.84591	6.74377	13.1156	22.6567
AKAP1	0.651291	0.208462	0.146129	0.124041	0	1.23404	0.142708	0.220883	0	0.603621	0.218293	0
AKAP1	0	1.09273	0.418672	0	0.619724	0	0	0	0	0.935699	0	0
AKAP10	12.0302	7.26964	7.47252	6.57474	9.58828	4.70205	6.25486	7.1146	7.27764	4.62607	6.58988	6.23539
AKAP11	11.8549	7.18945	8.85805	9.85034	8.45747	3.56023	9.70911	12.598	6.27705	3.98023	12.2523	9.54623
AKAP12	0.0486488	0	0	0.0908073	0.0591228	0	0.22562	0	0.178551	0	0.225645	0
AKAP12	0	0.0267714	0.0629163	0	0	0	0	0.135783	0	0.0503295	0	0.071623
AKAP13	9.88459	14.6304	8.41901	7.05888	12.9126	17.6664	18.4601	10.1514	14.4914	20.1385	21.561	10.4328
AKAP13	0.957288	0.519685	1.93028	0	5.26677	1.89942	20.1824	1.51776	1.71827	0.882318	17.4168	0
AKAP13	19.5909	13.6241	12.1808	2.14392	16.6674	9.98134	19.9819	0.398704	10.3048	12.6741	33.3287	3.51878
AKAP14	0	0.167193	0	0	0	0	0	0	0	0	0	0
AKAP17A	0	0	0	0	0	0	0	0	0	0	0	0
AKAP17A	0	0	0	0	0	0	0	0	0	0	0	0
AKAP2	5.13441	3.64482	0.645729	7.3318	6.47811	4.28885	1.58674	19.3972	5.28365	4.05422	1.81435	19.5816
AKAP2	0	0	0	0	0	0	0	0	0	0	0	0
AKAP3	0.804727	0.403687	0.100235	0.218131	0.606327	0.216565	0.0420741	0.0530533	0.249923	0.137985	0	0.198463
AKAP4	0	0	0	0	0	0	0	0	0	0	0	0
AKAP4	0	0	0	0	0	0	0	0	0	0	0	0
AKAP5	0.266691	0.0939675	0.0799951	0.118475	0.179629	0.0672141	0.0979373	0.172891	0.116351	0.160597	0.02669	0.230984
AKAP6	0.0912098	0.165387	0.058286	0.0422808	0.0480787	0	0.110097	0	0.0544985	0.0100298	0.0333375	0
AKAP7	2.35566	1.95572	0.535851	0.20678	0.964272	0.803785	0.431869	0.381958	0.657618	0.638504	0	0.305732
AKAP7	1.63672	1.20199	0.555193	0.288188	0.742935	0	0	0	0.824278	0	0.209724	0
AKAP8	16.0905	32.2982	24.8504	27.5488	19.1225	39.2576	24.8892	24.058	21.6759	35.7849	20.7688	23.5142
AKAP8L	42.2628	38.6124	28.6384	24.9812	53.467	53.5225	29.3918	24.7077	54.8046	46.1266	25.2254	30.7618
AKAP9	10.732	9.90717	6.57291	5.37454	6.88533	5.76059	7.2099	6.36972	5.12232	6.21677	6.00721	5.71629
AKD1	1.96836	1.12271	0.536825	0.564087	1.04891	0.431914	0.314611	0.414474	0.852079	0.490489	0.203134	0.234375
AKIP1	0	0	0	5.08245	0	1.52543	0.891133	0	0	1.13285	0.717785	0.662239
AKIP1	1.62097	1.83009	1.03098	1.57365	3.36459	4.21954	0.411939	6.75154	5.15806	2.96044	0.489783	5.3484
AKIRIN1	20.4308	30.0525	46.2762	30.2276	27.6335	34.7645	42.8546	35.7563	26.8738	30.9775	37.6247	31.4845
AKIRIN2	21.8321	34.8496	31.8511	33.7561	39.2036	59.4673	40.1843	42.5431	48.2473	57.5897	44.2703	45.9136
AKNA	71.5084	74.5775	31.4534	31.8239	97.7863	104.797	54.1093	32.2916	103.125	92.2132	40.617	37.262
AKNAD1	0	0	0	0	0	0	0	0	0	0	0	0
AKNAD1	0.0279816	0	0	0	0	0	0	0	0	0	0	0
AKR1A1	13.2466	12.2236	27.1326	75.5566	14.6498	18.5125	16.7148	76.2273	14.9842	15.5564	19.4659	71.8213
AKR1B1	20.7134	23.9023	15.3427	44.2155	15.9558	20.1167	15.2695	36.6743	14.5771	13.1155	9.04084	29.3677
AKR1B10	0	0	0	0	0	0	0	0	0	0	0	0
AKR1B15	0	0	0.0266117	0	0.10244	0	0	0.0985975	0	0	0.106547	0
AKR1C1	0.597406	0.482221	0.062718	0	0.482855	0	0	0	0.136833	0.22664	0	0
AKR1C2	0	0	0	0	0	0	0	0	0	0	0	0
AKR1C2	0.0221104	0	0	0	0	0	0	0	0	0.0591021	0	0
AKR1C3	0	0	0	0	0	0	0	0	0.157112	0	0	0
AKR1C3	0.376814	0.271489	0.570826	0	0	0	0.622734	0	0.331502	0.293698	0	0
AKR1C4	0	0.0464893	0	0	0.279303	0	0.106597	0.134413	0	0.0873985	0.14525	0
AKR1CL1	0.0193658	0.0521064	0.040662	0.154855	0.0782625	0.102496	0	0	0	0	0	0
AKR1D1	0.0621831	0	0.0327774	0	0	0	0	0	0	0	0	0
AKR1E2	3.71669	3.34491	0.699655	2.39125	1.65739	1.89927	0.711621	1.39583	1.64386	1.36139	0.43096	1.49187
AKR7A2	4.65543	4.37989	1.50256	3.01835	7.50011	6.2431	2.18323	4.52705	6.05198	6.68273	1.5866	4.34815
AKR7A2P1	0.124444	0.66967	1.01251	0.580474	0.251457	0.987956	0.959697	0.484051	0	0.31474	0.653845	0.226344
AKR7A3	0.331919	0.401883	0.104538	0	0.402412	0.527016	0.409553	0	0.304097	0.0839477	0.139515	0.241482
AKR7L	0.194488	0.104227	0.101801	0	0	0	0	0	0	0.147385	0	0
AKT1	3.00466	2.29337	1.73775	3.13759	3.44453	1.99472	2.44293	2.32923	1.35792	1.55348	2.55118	4.10834
AKT1	23.1437	28.0617	20.101	53.8672	44.2374	51.1133	31.4932	60.1037	49.3304	45.9738	25.7786	60.2988
AKT1S1	1.29511	1.25511	0.380228	3.37831	1.80841	3.36164	5.39886	5.34128	2.95788	5.11857	10.1924	9.59784
AKT1S1	5.78794	8.3125	1.59309	16.2983	9.93388	10.5449	0	13.7914	12.8253	12.1164	4.01438	10.1173
AKT1S1	0.421889	0.87298	2.22913	1.91919	2.05634	2.65617	7.39651	8.16377	3.72065	3.05641	13.3798	18.1164
AKT2	25.4046	31.2341	42.5704	53.5812	30.1278	44.2591	32.7702	45.9584	34.4953	35.6886	25.3119	42.8745
AKT3	7.6221	7.09863	6.11597	1.4803	4.80989	4.86561	4.39852	1.74832	3.68665	7.37738	7.21377	1.86181
AKT3	0	0	0	0	0.110035	0	0	0	0	2.00676	0	0
AKTIP	5.76114	4.24969	0.818687	2.81026	2.40244	1.31416	0.766571	3.30517	2.0668	1.75784	0.922119	2.26329
ALAD	12.0222	8.16517	2.62209	7.83001	12.3423	9.93129	2.39517	7.55047	9.30715	8.117	1.95821	8.75594
ALAS1	4.50907	3.11776	8.40156	29.5597	5.34175	3.35284	12.038	43.9821	5.97412	5.54045	12.3296	49.138
ALAS2	0.128695	0.115301	0	0.114221	0	0.226449	0	0	0	0	0	0
ALB	0.0366632	0.0246619	0	0	0	0	0	0	0.0839751	0	0	0
ALCAM	1.0004	1.2671	4.15238	2.76108	2.25486	2.14995	5.04831	4.89653	2.35315	1.93494	6.27501	3.75131
ALDH16A1	11.0311	12.5928	7.00932	19.5235	16.183	25.1964	12.8305	15.6806	22.8477	16.9361	7.61483	19.6323
ALDH18A1	7.90093	5.35467	11.3109	35.4922	9.65431	7.18296	9.07687	33.0475	8.56204	5.68067	8.18988	26.2003
ALDH1A1	0.0521627	0.0701754	0.0182541	0	0	0	0	0	0	0	0	0
ALDH1A2	0	0	0	0	0	0	0	0	0	0	0	0.13943
ALDH1A2	0	0	0	0	0	0	0	0	0	0	0	0.12816
ALDH1A3	0.0117857	0.0158556	0	0	0	0	0	0	0.0539891	0.029808	0	0
ALDH1B1	1.18072	0.577618	0.831074	14.1979	1.73513	0.852152	1.24167	12.7864	2.15121	0.848364	1.46632	14.1542
ALDH1L1	0.0273843	0	0	0	0.166371	0	0	0	0	0	0	0
ALDH1L1	0	0	0	0	0	0	0	0	0	0	0	0
ALDH1L1-AS1	0	0	0	0	0	0	0	0	0	0	0	0
ALDH1L1-AS2	0.0177319	0.023855	0	0	0.0716592	0	0.0546982	0	0	0	0	0
ALDH1L2	0.0603965	0.059028	0.0806577	0.263443	0	0	0	0.213284	0.0751317	0	0	0.118536
ALDH2	0.35369	0.490685	0.0674374	2.12976	0.484395	0	0.308191	0.249556	0.294258	0.162312	0.269822	0
ALDH3A1	0	0	0.0390474	0	0	0	0	0	0	0	0	0
ALDH3A1	0	0	0	0	0	0	0	0	0	0	0	0
ALDH3A1	0	0.0619701	0	0	0	0	0	0	0	0	0	0
ALDH3A2	5.89067	4.12532	0.7007	3.74393	4.40611	2.70772	0.995036	4.24074	2.59853	1.63469	0.794446	3.47982
ALDH3B1	0	0	0	0	0	0	0	0	0	0	0	0
ALDH3B1	0.0605792	0.0395297	0	0.120387	0	0	0	0	0	0	0	0
ALDH3B2	0.0233157	0.0313671	0	0	0	0	0	0	0	0	0	0
ALDH3B2	0.0247741	0.0333291	0	0	0	0	0	0	0	0	0	0
ALDH4A1	0.101126	0.13652	0.171857	0.758641	0.176545	0.296532	0.39167	0.32194	0	0.148705	0.082905	0
ALDH4A1	0.0969407	0.13087	0.164745	1.53525	0.169239	0.284261	0.20407	1.2416	0.278643	0.21912	0.217858	1.93296
ALDH5A1	2.77414	1.85328	1.1545	5.11376	1.47907	0.593509	0.74248	4.25816	1.13921	0.4665	0.336331	3.30192
ALDH6A1	3.82714	1.90963	0.931474	0.91295	2.66102	1.53795	0.824901	1.08222	2.84908	1.1657	0.711181	1.36149
ALDH7A1	0.193458	0.181143	0.0728939	0.0667096	0.14019	0.0917114	0.0534656	0	0.0740742	0.0436146	0	0
ALDH8A1	0.94709	0.716735	0.162226	0	0.482361	0.361276	0.211187	0	0.469648	0.390807	0.215013	0
ALDH9A1	12.8187	10.3294	8.28556	12.5603	10.9201	7.49951	8.64034	11.8563	11.246	7.25086	6.57925	9.82948
ALDOA	3.3594	2.10717	2.35716	12.0295	2.47899	2.86014	0.973394	13.5322	2.0027	2.43418	1.28934	7.13585
ALDOA	54.6219	39.7525	34.8196	234.566	38.9133	36.1289	14.1352	206.938	20.2154	39.7509	27.1546	248.511
ALDOA	2.0445	1.88764	2.57467	19.8324	1.39041	1.82021	1.25961	4.23398	2.06999	0.436734	5.47931	66.3214
ALDOA	110.92	158.127	259.129	755.256	230.757	251.764	292.085	729.077	278.286	258.514	232.852	649.177
ALDOB	0.0509371	0.0228422	0.0178252	0	0	0	0.104752	0	0	0.0429427	0	0
ALDOC	11.5265	14.4328	6.83628	11.9036	10.0826	13.2047	7.61921	8.2488	8.91459	9.14958	5.97752	7.07904
ALG1	1.32784	1.10392	2.88014	10.5851	1.65295	1.36899	2.40877	10.7615	1.53244	1.67322	1.7324	10.7706
ALG10	1.3041	1.01013	0.746779	1.22889	0.532345	0.41831	0.73142	1.17847	0.603428	0.599688	0.553688	1.15003
ALG10B	0.780971	0.627093	0.334826	0.414147	0.247862	0.086563	0.2901	0.477132	0.412073	0.165462	0.240613	0.26773
ALG11	2.4944	2.07586	4.75288	5.78088	1.68914	1.21	4.06038	3.87091	2.77273	2.29807	3.51007	3.66725
ALG12	10.9531	14.0581	5.37589	11.3355	15.2224	16.7205	9.2634	13.7062	15.4262	14.8388	5.10732	14.7756
ALG13	2.03662	1.0032	0.268742	0.356891	0.886166	0.182965	0.656478	0.741367	0	0.365431	0.384577	0
ALG13	8.91713	15.4734	14.3804	7.5459	6.96233	8.3388	10.5476	7.44788	6.79749	9.14163	9.63999	6.53488
ALG13	0.81323	1.55831	1.38452	0.60264	0.303799	0.700485	0.847862	0.470138	0.442392	0.141701	0.536122	0.418084
ALG14	1.32497	0.681549	0.777329	3.42777	0.944926	0.618758	0.480847	2.88003	0.892583	1.47842	0	2.26815
ALG1L	0.101685	0	0.142364	0	0.361486	0.236709	0	0	0.204877	0	0	0
ALG1L2	0.0960442	0.0674888	0	0	0.303037	0.449967	0	0	0	0.860095	0.178677	0
ALG2	2.69956	4.95893	10.3767	8.35873	4.08482	5.50536	15.3205	11.0429	3.89638	6.38356	16.1248	12.4516
ALG3	11.1369	8.90047	30.0209	70.5792	14.0456	12.6014	15.365	72.4119	14.5526	10.1427	19.072	86.4247
ALG3	0.544175	0.939137	0.577776	8.4454	0	0	1.15662	4.86327	0	0	0	4.70267
ALG5	5.68505	4.99933	8.02809	17.4753	6.02022	5.4346	6.85937	22.1397	10.4411	7.96009	7.98995	17.0341
ALG6	3.27476	2.07129	0.795351	2.18217	1.5802	1.09942	0.791558	2.99434	1.51133	0.988944	0.719055	2.93367
ALG8	5.50659	3.27172	6.04048	12.6375	4.091	1.4367	2.58943	12.6786	5.54229	3.3722	2.07519	14.5514
ALG9	0.769195	0.293456	0.124151	0.12776	0.382046	0.253174	0	0.0923144	0.12981	0.242993	0	0
ALG9	1.60832	2.3886	2.25493	3.50093	1.76702	1.86321	2.33625	3.48715	1.73669	1.84744	1.66615	2.5835
ALK	0.111772	0.088452	0.013805	0.0350495	0.159423	0.0347979	0.0202815	0	0.0301184	0.0332575	0	0
ALKBH1	2.62922	2.44384	5.75472	5.26664	1.7387	1.93973	5.55443	5.26838	1.02193	1.57175	4.95637	4.75313
ALKBH2	4.48937	5.11681	11.2393	38.8284	3.87037	4.06109	3.19034	25.8296	5.55399	5.09786	3.77069	16.8193
ALKBH3	8.19097	4.90931	4.43741	11.3361	7.85109	3.75159	4.13018	10.4159	6.37392	3.45272	3.31048	11.269
ALKBH4	1.75835	1.1967	0.866144	5.309	3.3859	1.87158	1.21693	4.32031	3.22742	2.0511	1.17296	3.59063
ALKBH5	25.761	42.6954	29.7909	58.5262	46.7924	74.7441	42.8604	54.6048	54.2497	63.8487	35.8582	51.5033
ALKBH6	12.9544	15.6562	7.94106	19.9042	23.2514	19.2896	9.40617	22.2335	18.104	16.5356	6.55528	26.1719
ALKBH7	21.4466	32.2249	17.9669	13.0332	27.6398	52.5777	24.5345	10.1116	32.4647	36.1613	19.9024	15.3104
ALKBH8	3.89933	2.31635	4.14683	6.58701	2.61955	1.87615	2.46817	5.35777	2.36619	1.92118	1.66029	4.42113
ALLC	0	0	0	0	0	0	0	0	0	0	0	0
ALMS1	5.0174	5.44632	3.04535	2.98229	3.54262	2.81748	2.82211	2.83939	3.27093	3.42641	2.26438	2.57424
ALMS1P	0.54335	0.348085	0.217307	0	0.209126	0.13694	0	0	0	0.130878	0.108755	0
ALOX12	1.28725	1.38384	0.963672	0.558741	1.29763	2.00432	1.14611	0.271791	0.880243	2.06781	1.70577	0.508362
ALOX12B	0.510362	0.39867	0.483946	1.75528	0.199598	0.261402	0.406279	1.28074	0.301666	0.124915	0.2076	1.07798
ALOX12P2	0.327386	0.280279	0.156228	0.436314	0.240556	0.0787605	0.137714	0.405183	0.136338	0.0752739	0	0.324797
ALOX15	0.0613877	0.082586	0	0	0.124042	0	0	0	0	0.155259	0.0645075	0
ALOX15B	0.0494242	0.10201	0.0345535	0	0	0	0	0	0	0	0	0
ALOX15P1	1.655	1.23695	0.450459	0.163382	0	0.648836	0.378166	0.953696	1.40396	0.465085	0.257646	0.445951
ALOX5	1.16953	0.939343	0.374673	0	11.6873	10.7427	6.3894	0	11.7625	10.7787	7.4543	0
ALOX5AP	11.1958	12.277	3.58839	1.25273	23.7419	12.8815	8.23274	2.61159	0	29.1226	14.1812	3.54144
ALOX5AP	15.1625	0	0	1.69657	32.1537	17.4455	11.1496	3.53688	77.7553	39.4409	19.2057	4.79619
ALOXE3	0.15926	0.197116	0.0133758	0	0.0772337	0	0	0	0	0	0	0
ALOXE3	0.151572	0.187599	0.0127301	0	0.073505	0	0	0	0	0	0	0
ALPI	0.0807669	0.0651943	0	0	0	0	0	0	0	0	0	0
ALPK1	2.26368	1.70144	0.524159	0.674403	1.48892	1.0881	0.610191	0.553018	1.18109	0.562374	0.232429	0.515565
ALPK2	0.0846393	0.0303645	0.035543	0.827204	0.250837	0.149321	0.191466	0.131688	0.336027	0.214067	0.142305	0.0410519
ALPK3	0.0603699	0.0659886	0.0594175	0.0603421	0.137234	0.0998484	0.151308	0.0733814	0.103705	0.0954283	0.174455	0.0549014
ALPL	0	0	0	0	0.0641234	0	0	0	0	0	0	0
ALPP	0.0143673	0	0	0	0.116124	0	0.0443194	0	0.0658152	0	0.06039	0
ALPPL2	0	0.0666582	0.0346785	0	0	0	0	0.0642425	0	0	0	0
ALS2	1.58574	1.92611	1.44875	2.48809	1.53516	1.37898	1.38803	4.66883	1.114	1.23896	1.12806	3.91027
ALS2CL	4.25609	4.50859	0.980685	0.239542	3.63407	5.23274	0.554377	0	2.76467	4.32965	0.837165	0
ALS2CL	4.16192	4.47842	0.0847311	0.26983	5.47736	6.93072	0.296087	0.34909	6.71843	3.96172	0.839386	0.207414
ALS2CL	3.40383	2.38015	1.654	0.505867	3.18962	2.19743	2.10211	0.356584	0.891134	0.163249	0.857404	0.211866
ALS2CR11	0.234151	0.171377	0.0783872	0	0	0	0	0	0.0330691	0	0	0.05252
ALS2CR12	1.05926	0.740945	0.333474	0.168777	0.513069	0.896198	0.326226	0.328957	0.387297	0.320965	0.355427	0.307039
ALS2CR8	3.23721	1.36291	0.328925	0.267902	1.73821	0.631688	0.368517	0.185864	1.09415	0.586301	0.300961	0.115156
ALS2CR8	0.407195	0.0637562	0.0340475	0.0441168	0	0	0	0	0	0	0	0
ALX1	0.063714	0.171431	0.0334447	0	0	0	0	0	0	0	0	0.23177
ALX3	0.55739	0.899841	1.43367	0.668561	1.12628	0.590011	0.773731	0.650423	1.65967	0.493406	0.702862	1.0138
ALX4	0.0678229	0.0405526	0.0158229	0.0401729	0.0304545	0.159538	0.0697387	0.0586245	0.103563	0.133416	0.126702	0
ALYREF	23.3179	32.6328	94.6875	226.691	47.041	63.793	95.5585	203.745	58.8265	59.1646	79.5457	180.026
AMACR	0.157742	0.173141	0.140916	0.960877	0	0.533192	0.487291	0.750693	0.754904	0.100466	0.207369	0.713093
AMBN	0.061725	0.0830397	0.0216004	0	0	0	0	0	0.0942518	0.0520375	0	0
AMBP	0	0.0386708	0	0	0	0	0	0	0	0	0	0
AMBRA1	1.04643	1.01312	0	0	1.10047	0	0	0	0	0	0	0
AMBRA1	8.17926	8.44507	10.3003	13.8117	11.0829	13.3271	12.5117	13.4383	14.0057	11.1926	9.37898	12.3055
AMD1	9.68721	18.0836	42.6027	24.382	5.99317	6.1512	30.8535	28.5184	7.59472	10.8984	43.8892	14.343
AMD1	8.22307	15.8875	58.1103	22.0889	9.75476	15.8413	43.0091	15.5719	8.28878	18.8389	30.0078	21.9488
AMDHD1	0.539959	0.415095	0.0809813	0.359807	0.0779328	0.204128	0.118974	0.375049	0.353356	0.243865	0	0.420898
AMDHD2	9.5861	13.0399	8.29257	5.12133	14.9367	30.9376	14.9129	5.49664	17.486	18.4678	9.41122	4.53303
AMELX	0	0	0	0	0	0	0	0	0	0	0	0
AMELY	0	0	0	0	0	0	0	0	0	0	0	0
AMFR	15.6297	17.6251	11.2795	12.0162	15.9066	19.4997	23.4715	13.6188	14.1519	17.1317	16.2077	14.651
AMH	0.285766	0.458667	0.492871	1.6866	0.494939	1.72852	0.566687	1.08083	0.84154	1.60037	0.857969	0.742515
AMHR2	0	0.105227	0	0	0	0	0	0	0	0	0	0
AMICA1	6.31418	1.60688	0.698372	1.01209	0.109548	1.68591	0.528556	5.85772	0.767364	0	2.05008	19.7692
AMICA1	11.0193	11.1666	13.8892	53.172	21.3125	13.5936	14.6652	39.4412	26.6187	22.6231	22.9149	29.1258
AMIGO1	12.9024	9.30688	1.73256	2.62151	6.73672	6.88171	1.6455	1.88037	6.49082	3.07773	0.420408	2.78941
AMIGO2	5.9964	3.71397	8.15207	11.9553	3.59164	2.85046	5.94127	8.59113	3.82484	2.65689	5.32123	4.01609
AMIGO3	2.52247	3.63592	2.24077	2.58596	4.0888	6.45518	3.93334	1.94076	4.57127	5.85394	3.20411	1.41168
AMMECR1	4.79942	2.89887	1.15603	3.92872	5.80187	4.41822	1.56991	5.01931	5.55145	2.99828	0.880566	5.1832
AMMECR1	0	0	0	0	0	0	0	0	0	0	0	0
AMMECR1L	3.24626	0	0	0	0	2.76911	0	4.43238	2.43736	3.12874	0	0
AMMECR1L	0.255002	3.65955	10.001	8.71105	4.94514	2.75252	12.8037	4.40582	2.42275	3.10999	13.4689	8.13944
AMN	1.50796	1.77955	1.80531	1.19876	0.641481	1.40019	2.44824	0.823229	0.484758	0.736011	1.3344	0.769889
AMN1	4.49171	2.49352	1.19776	1.13265	1.45329	0.311449	0.463895	0.839271	0.718843	0.529031	0.412243	0.428123
AMOT	0.137622	0.215298	0.100245	0	0.131276	0	0.201067	0.0717768	0.346731	0.159844	0.149269	0.131595
AMOT	0.435032	0.17029	0.0590883	0.151214	0.882233	0.769578	0	0.120245	0.180703	0.50129	0	0.181735
AMOTL1	0.0823914	0.0554213	0.033638	0	0.0184981	0.0484518	0.0141198	0.0178043	0.125809	0.0347302	0.0384794	0.0333014
AMOTL2	0	0	0.0260297	0	0.0667995	0	0.229449	0	0.113579	0	0.0694776	0.0601282
AMPD1	0	0	0	0	0	0	0	0	0	0	0	0
AMPD2	9.39092	10.6835	6.93371	49.1516	29.5162	29.3522	19.1906	38.9983	24.2061	36.0398	19.2393	37.4016
AMPD2	1.96565	0.450245	0.68862	2.01304	0	4.84136	0	2.87316	5.7175	2.87493	1.71596	3.70887
AMPD2	0	1.53026	1.53883	2.07362	0	9.64498	2.71429	0	1.60163	0	0	0
AMPD2	1.9955	1.50945	2.36626	2.00741	7.00075	10.4369	3.04541	2.62753	14.258	14.9418	0.0763486	3.86122
AMPD3	0.402637	0.393825	0	0	0	0	0	0.406599	0	0	0	0
AMPD3	2.96964	2.22917	0.528921	1.56096	2.84911	2.81017	2.07446	2.74341	3.62273	2.10114	1.46456	1.99523
AMPD3	0	0	0.196916	0.247404	0	0	0	0	0	0	0	1.10344
AMPD3	1.88357	1.52103	0.684464	0.615588	2.2273	1.67535	0.500578	0	1.26791	1.22793	0.697313	0.395996
AMPD3	0.980271	0	0.442724	0	0.593604	0.216927	0	0	0	0.438797	0	0
AMPH	0.149632	0.0500487	0.0517108	0	0.0990744	0	0	0	0	0.0591007	0	0
AMT	8.08744	7.04287	1.49025	0.590584	5.87444	8.93186	2.5188	0.927031	5.65137	5.03719	1.75754	0.990485
AMTN	0.0413566	0	0.0434177	0	0	0	0	0	0	0	0	0
AMY1A	0	0	0	0	0	0	0	0	0	0	0	0
AMY1A	0	0	0	0	0	0	0	0	0	0	0	0
AMY1A	0	0	0	0	0	0	0	0	0	0	0	0
AMY1A	0	0	0	0	0	0	0	0	0	0	0	0
AMY1A	0	0	0	0	0	0	0	0	0	0	0	0
AMY1A	0	0	0	0	0	0	0	0	0	0	0	0
AMY1B	0	0	0	0	0	0	0	0	0	0	0	0
AMY1B	0	0	0	0	0	0	0	0	0	0	0	0
AMY1B	0	0	0	0	0	0	0	0	0	0	0	0
AMY1C	0	0	0	0	0	0	0	0	0	0	0	0
AMY1C	0	0	0	0	0	0	0	0	0	0	0	0
AMY1C	0	0	0	0	0	0	0	0	0	0	0	0
AMY2A	0	0	0	0	0	0	0	0	0	0	0	0
AMY2B	4.23016	2.8224	1.20615	0.165008	1.93831	1.0933	0.859822	0.147059	2.11096	0.649406	0.506336	0
AMZ1	0.0932981	0.16317	0.0685636	0.12434	0.0754086	0.0987583	0.0575601	0	0.170955	0.21237	0.0784318	0
AMZ2	17.1932	16.4094	29.4744	24.1443	23.5755	30.4462	28.9349	23.4757	33.7003	26.0689	23.2974	20.9728
AMZ2P1	1.19672	1.89977	5.17622	0.60606	0.773803	2.28016	3.50699	0.558585	1.31569	3.1175	2.56538	0.783589
ANAPC1	2.79542	2.38537	3.01859	7.64971	1.80752	2.11358	2.00385	7.53883	1.63423	1.92575	1.92475	5.92695
ANAPC10	2.15741	0.635694	0.336649	1.67889	2.01853	0.578386	0.699694	1.6244	1.28049	0.982567	0	1.60927
ANAPC10	0	0.183883	1.05844	0.0830268	0	0	0	0.511632	0	0	1.09477	0
ANAPC11	8.85017	11.2203	11.7784	48.4642	11.8475	22.1762	16.2364	45.4634	18.1172	13.4327	10.5894	32.5164
ANAPC11	0.429313	0.176932	0.38715	0.849071	0	0.9597	0	0	0	0.229654	0	0
ANAPC13	0	2.74483	6.30887	7.09602	0	2.69896	1.87336	4.19506	5.68162	3.43816	1.4692	2.16789
ANAPC13	5.55654	0.629329	0	0	4.76926	0.192897	0	5.01935	0	0	0.538963	0
ANAPC13	3.59717	2.0764	2.91529	7.41632	3.25939	1.36832	3.58828	8.06957	1.55797	1.84404	1.59138	11.337
ANAPC15	14.7739	17.6358	6.91743	23.5852	21.7228	18.163	9.98996	15.9689	16.7625	16.396	6.1968	18.0079
ANAPC16	24.86	22.2584	12.7192	12.472	18.1125	12.9279	10.2441	11.1269	19.2052	13.1292	8.36958	9.99485
ANAPC1P1	0.0541967	0.0312903	0.0244179	0	0	0	0	0	0	0	0	0
ANAPC2	19.131	20.6473	22.1345	29.2373	23.8599	26.4841	25.3657	23.0837	22.3635	18.2506	17.6344	25.0843
ANAPC4	11.9627	6.63655	4.15932	5.54715	6.97755	3.75315	4.13718	5.93633	6.07317	4.24982	4.40621	4.93484
ANAPC5	33.1403	26.1346	20.724	52.3237	30.8193	24.5828	22.653	52.3079	27.5305	24.0106	18.7974	46.007
ANAPC5	0	0	0	0	0	0	0	0	0	0	0	0
ANAPC7	8.28811	5.69127	10.4714	19.0819	7.35734	5.36498	7.42335	18.0083	6.28712	5.73128	8.482	17.1874
ANG	0	0.0915311	0	0	0	0	0	0	0	0	0	0
ANG,RNASE4	0.14586	0	0	0.0815089	0	0.242772	0	0	0	0.368903	0	0
ANGEL1	8.03583	4.21916	4.43906	6.67675	6.51928	4.24245	4.14171	5.14453	5.18662	3.16769	3.87466	5.61306
ANGEL2	5.59965	4.12425	3.59049	3.70777	3.25839	2.48537	3.00646	3.85991	3.36878	2.66666	2.71867	4.31889
ANGPT1	0.0284961	0	0	0	0	0	0	0	0	0	0	0
ANGPT2	0.134902	0.166901	0.119587	0.021838	0.130696	0.0497239	0.0996119	0	0.111084	0.0822305	0	0
ANGPT4	0.0214425	0	0	0.114308	0	0	0	0	0.098226	0.108463	0	0.312003
ANGPTL1	0.127778	0.140648	0.0365855	0	0	0.122961	0	0	0.0532127	0	0	0
ANGPTL2	0.0230633	0.0155138	0	0.092211	0	0.0610327	0.0355722	0	0	0.0583309	0.0484709	0
ANGPTL3	0.0193749	0.0781964	0	0	0	0	0	0	0	0	0	0
ANGPTL4	0.206987	0.123711	0.217303	0.183782	0	0.242438	0	0.178174	0	0.116182	0	0
ANGPTL5	0	0.0234017	0	0.0463651	0	0	0	0	0	0.0439945	0	0
ANGPTL6	0.586146	0.561261	3.02288	6.74117	1.23731	1.30311	3.2411	4.74629	1.42483	0.84392	3.29937	4.70936
ANGPTL7	0.147243	0.123805	0.0772905	0.0490583	0.148762	0.0974124	0.170327	0	0.252938	0.0931001	0	0
ANHX	0	0.0313967	0	0.0622054	0	0	0	0	0	0	0	0
ANK1	0.0929753	0	0	0.198674	0.230335	0.392104	0.161828	0	1.66873	0.970695	0.378633	0
ANK1	0.843195	1.016	0.556795	2.03444	7.95319	7.35947	4.06432	7.69545	6.01832	6.58752	3.34434	8.19585
ANK1	0	0	0	0	0	0	0	0	0	0	0	0
ANK2	0	0	0	0	0	0	0	0	0	0	0	0
ANK2	0.0356726	0.0396358	0.0107569	0	0.0193798	0	0.0308465	0	0.0132481	0	0	0
ANK3	0.202665	0.182629	0	0	0.188549	0.160119	0.0308439	0	0	0.11661	0	0.097102
ANK3	0.189132	0.131616	0.0940347	0.051872	0.122228	0.0752042	0.09563	0.0941046	0.0920439	0.0981325	0	0.0778039
ANK3	0.0595194	0.521874	0.294143	1.56389	0.0844394	0.465311	0.212643	3.99093	0.0947466	0.318189	0.186027	5.07214
ANK3	3.38473	3.33749	1.78143	0.32257	4.01829	3.20637	3.24295	0.210564	3.43175	3.8102	1.86653	0
ANKAR	0.914115	0.552144	0.195852	0.0248624	0.452349	0.444312	0.115094	0.0725638	0.213646	0.0707738	0.039207	0.135724
ANKDD1A	1.03243	0.552015	1.05609	0.882009	0.695385	0.420326	0.734945	1.18415	0.666971	0.435195	0.778899	0.866681
ANKFN1	0.0679161	0.0228422	0	0.0452566	0	0	0	0	0.233337	0	0	0
ANKFY1	0.0238237	0	2.21991	0	0	0	7.7189	2.57698	1.85182	1.02184	3.13301	0
ANKFY1	11.4445	10.1006	5.95695	9.38853	10.4103	9.15841	0.0995222	6.85565	5.91372	6.13588	3.33723	10.0055
ANKH	13.4453	10.884	15.0124	16.5394	13.7352	11.1587	18.0085	19.6821	13.4551	9.95845	17.0408	21.6982
ANKHD1,ANKHD1-EIF4EBP3	36.2933	39.8908	41.7764	35.4703	32.1774	45.7325	44.3084	38.3138	29.0824	48.0067	41.6708	38.0917
ANKIB1	7.85077	6.25141	5.88819	7.63727	6.92575	5.19837	5.18201	8.45764	5.02682	5.03678	4.81177	7.58931
ANKK1	1.73317	1.59076	0.6632	0	0.981898	0.771561	0.349763	0.0630047	0.593605	0.737406	0.204253	0
ANKLE1	0.499364	0.447869	0.201635	1.74057	0.517452	0.542142	0.236986	1.04589	0.527892	0.356223	0.161459	1.0247
ANKLE2	18.2948	15.4263	45.7855	34.4549	22.0683	20.8815	46.972	36.6948	20.1051	17.924	53.3629	41.2748
ANKMY1	10.5105	8.69556	2.70802	5.51967	11.6039	12.3473	5.12384	3.08372	9.7648	7.4898	3.82662	3.7368
ANKMY2	2.24093	1.73511	0.727786	0.988348	1.95457	1.10924	1.24329	1.69314	1.47704	1.34556	1.08423	1.52479
ANKRA2	11.0193	11.0931	2.91179	1.79824	8.7852	6.64541	2.54359	2.18682	9.18565	6.39862	2.59944	2.18147
ANKRD1	0.0626005	0.0280725	0	0	0.168657	0	0.0643687	0.0811656	0	0	0	0
ANKRD10	18.8208	12.8599	4.19441	7.56886	18.4145	14.9417	7.07891	12.137	16.3357	12.1507	5.96789	8.88828
ANKRD11	41.7033	39.0259	42.0723	98.5319	47.3545	55.622	46.913	69.0397	42.0801	44.3677	41.7124	74.2416
ANKRD12	25.8942	22.6873	21.2	9.35713	19.8187	16.4493	28.2676	13.3198	18.6005	16.3475	24.2264	14.8439
ANKRD12	0.700375	0.267636	0.616708	0.304046	0.578979	0.382757	1.06114	0.458628	0.30238	0.389746	0.993556	0.409708
ANKRD13A	20.5956	12.2373	5.24505	8.17544	27.1761	18.7439	14.4686	13.2834	26.0731	18.5539	13.2468	13.2662
ANKRD13B	0.44138	0.628726	1.30836	21.6263	2.57068	2.06123	1.24141	20.602	2.67606	2.16698	1.63698	16.8115
ANKRD13C	4.94264	5.41733	5.61631	6.29655	5.6105	5.8859	6.16597	6.58752	5.56054	5.05545	6.53813	8.09086
ANKRD13D	5.8454	13.3967	1.7817	6.91185	25.4912	26.3003	7.65893	7.48617	18.1675	12.6922	14.5346	6.27727
ANKRD13D	35.6566	15.7895	6.78093	14.5836	52.1218	35.9507	13.6757	14.4156	66.7772	40.1172	2.50022	19.3685
ANKRD16	3.25595	2.54646	2.78433	9.31252	3.50715	3.20454	2.41552	7.46895	3.26237	2.11173	2.35418	8.76473
ANKRD17	16.1325	12.544	22.9778	21.9968	13.489	9.77792	20.5143	22.1549	10.7286	9.12872	17.3202	22.0474
ANKRD18A	0.925643	0.637467	0.451182	0.851788	0.935193	0.758191	0.475895	0.857255	0.302877	0.529535	0.787413	0.80171
ANKRD18B	0.021951	0	0.023045	0.0292546	0.0887101	0	0	0	0.0502777	0	0	0
ANKRD18DP	0.0284567	0.0191417	0.0448125	0.227549	0	0	0	0.387408	0.0651786	0	0.119612	0.207032
ANKRD19P	0.821323	0.792675	0.356149	0.333137	0.793718	0.566993	0.605853	0.625049	0.899702	0.587051	0.150098	0.3897
ANKRD2	0	0	0	0	0	0	0	0	0	0	0	0
ANKRD20A1,ANKRD20A3	0	0	0	0	0	0	0	0	0	0	0	0
ANKRD20A11P	0.226948	0.152659	0.0794197	0	0.15286	0.200192	0	0	0	0.0956649	0	0
ANKRD20A12P	0.0472375	0.0635495	0	0	0	0	0	0	0	0	0	0
ANKRD20A2,ANKRD20A3	0	0	0	0	0	0	0	0	0	0	0	0
ANKRD20A2,ANKRD20A3	0	0	0	0	0	0	0	0	0	0	0	0
ANKRD20A4	0.023424	0.0157564	0	0.0312177	0	0	0	0	0	0	0	0
ANKRD20A5P	0.666703	0.642798	0.23331	0.414647	0.449054	0.411671	0.239937	0.475433	0.559917	0.309137	0.0934115	0.323366
ANKRD20A8P	0	0.0452985	0	0	0	0	0	0	0	0	0	0
ANKRD20A9P	0.0164471	0.0103257	0.00920894	0	0.0177245	0	0	0	0	0	0	0.00797719
ANKRD22	0.0723921	0.0278259	0.0217143	0	0	0	0	0	0.0473744	0.0261559	0	0
ANKRD23	4.48285	3.39101	0.703427	1.95603	6.57605	4.30614	1.52555	2.60623	7.89262	3.10681	0.871726	2.66949
ANKRD24	0.787808	0.894681	0.429648	0.163625	0.413473	0.703953	0.568095	0.0397965	0.328079	0.543408	0.129015	0.148872
ANKRD26	3.73774	2.33844	1.39096	0.680382	1.35087	0.595077	0.71242	0.732844	0.723865	0.737823	0.459828	0.486384
ANKRD26P1	0.0201818	0.0181007	0.00706256	0	0	0.0356049	0	0	0	0	0	0
ANKRD26P3	0.0221101	0.0446177	0	0	0	0	0.0341019	0	0	0	0	0
ANKRD27	4.8286	4.5049	1.92282	7.47073	5.60738	5.82598	5.90663	9.28295	5.59339	5.68505	5.52114	8.95067
ANKRD28	0.817813	0	0	0	0	0	6.52981	0	0	0	0	0
ANKRD28	1.04541	0.691723	0.75024	0	0.686441	0.272624	3.60075	0	3.03869	0.831516	10.4472	0
ANKRD28	6.32005	5.42344	4.12951	6.40932	9.63074	7.91158	10.7869	8.26605	9.53274	9.97839	19.4162	9.64493
ANKRD29	0.0906096	0.0731393	0	0	0	0	0.0559014	0	0.0830145	0.0458333	0.0761717	0
ANKRD30A	0.308583	0.264181	0.0490852	0.0249245	0.0377899	0	0	0	0.0428359	0.0236502	0	0
ANKRD30B	0.0267649	0.0480097	0.0187325	0.0237801	0.0360547	0	0.0275209	0	0	0	0.0375002	0
ANKRD30BL	0.0238513	0	0.02504	0	0	0	0	0	0	0	0	0
ANKRD30BL	2.63045	3.07214	3.67195	4.00646	3.50451	3.67173	4.99339	3.37307	15.3602	2.85122	3.15901	2.10301
ANKRD30BP2	0.0120512	0.0162128	0.0126519	0	0	0	0	0	0	0	0	0
ANKRD31	0.491345	0.201977	0.0859722	0.145517	0.0551572	0	0.021051	0.0265442	0.0937833	0.0172596	0	0
ANKRD32	1.43677	1.04639	1.1001	1.5261	1.70263	0.686102	1.06636	1.72281	1.53408	1.20217	1.226	1.65048
ANKRD33	0	0	0	0	0	0	0	0	0	0	0	0
ANKRD33B	0.114751	0.136564	0.991559	1.41167	0.374558	0.490538	3.60783	3.27892	0.525661	0.770208	3.45052	3.21096
ANKRD34A	1.08338	0.78244	0.562699	5.04584	1.10608	1.44856	0.562852	4.16965	1.35825	0.951802	0.766947	5.14399
ANKRD34B	0.0837431	0.0422479	0.0219792	0	0.0423035	0	0	0	0	0	0	0
ANKRD34C	0.00759423	0.0102167	0.0159454	0	0	0	0	0	0	0	0	0
ANKRD35	0.07349	0.0329558	0.0128588	0.0652944	0.148496	0	0.0377829	0	0	0.061956	0	0.267332
ANKRD36	6.99224	4.36744	2.82866	1.05098	2.7089	3.1651	2.45289	0.869099	2.61905	3.34078	1.9612	1.00403
ANKRD36B	1.56204	0.935004	0.621281	0.256782	1.16798	0.691976	0.424537	0.294425	0.788056	1.09644	0.37601	0.15019
ANKRD36BP1	4.9652	4.61294	4.53478	2.78932	3.95915	2.35685	6.45622	1.90533	3.46785	2.98459	5.24094	2.26784
ANKRD36BP2	2.33337	1.56956	0.474934	0.126928	0.0962222	0	0.146895	0	0	0.0602191	0	0
ANKRD37	1.0586	7.39921	6.54424	4.58241	1.26152	7.4688	9.15548	5.09971	1.89875	6.63364	7.87996	5.41304
ANKRD39	8.80701	9.37985	3.90063	34.6005	18.3519	19.179	6.36734	37.6466	19.5416	14.8496	3.85609	47.7217
ANKRD40	6.88659	7.97532	20.9115	26.3091	5.90951	6.43202	18.165	24.4424	7.73959	6.64707	17.6917	21.9242
ANKRD42	1.07721	1.3843	1.6879	1.24277	1.29949	1.2764	2.03342	0.500299	1.25206	1.17923	1.75706	1.40365
ANKRD44	31.0878	31.9361	13.8408	13.1872	20.3577	25.0818	13.1555	12.3805	18.0444	26.221	18.0798	14.022
ANKRD45	0.0462648	0.041494	0	0	0	0	0	0	0	0	0	0
ANKRD46	1.22805	1.08549	0.627603	0.682148	0.86253	0.333417	0.944673	0	0.610115	0.692841	1.01855	0.90603
ANKRD46	0.662591	1.50818	0.933878	2.06766	0.279433	0.568775	1.3487	2.58907	0.153416	0.674698	1.25344	3.29237
ANKRD49	9.98966	8.1741	5.42537	3.86147	5.67989	3.20433	5.06921	2.69137	5.4478	2.40624	3.45368	3.30355
ANKRD5	1.0689	0.636801	0.874115	0.758957	1.01747	0.40515	0.84446	0.894315	0.601676	0.609241	0.966333	0.955677
ANKRD50	0.139933	0.0559142	0.122573	0.110796	0	0.0452413	0.0495806	0.10503	0.0499548	0.0649867	0.0689137	0.0793378
ANKRD52	9.65047	11.4787	10.766	27.8667	13.7887	12.87	12.9765	27.1909	12.4036	13.4196	10.9011	26.762
ANKRD53	0.123816	0.277851	0.264666	0.10968	0.39157	0.411101	0.127086	0	0	0.104073	0.173322	0
ANKRD54	3.64135	4.74459	5.961	14.1044	8.03254	9.96522	9.56583	12.5039	6.7084	7.14728	7.18485	10.2846
ANKRD55	15.2078	10.9279	1.05515	0.043917	3.7288	1.74407	0.355779	0.128177	1.50954	0.791761	0	0
ANKRD6	0.628275	0.120003	0.0873328	0	0.894087	1.06558	0.38695	0.43311	0.716074	0.798597	0	0.330949
ANKRD6	0.0447009	0	0	0	0	0.109765	0	0	0	0.0975843	0	0
ANKRD6	0.255847	0.410812	0.116156	0.514413	0	0	0	0	0.498457	0.252794	0.352058	0.56674
ANKRD62P1-PARP4P3	0	0	0	0	0	0	0	0	0	0	0	0
ANKRD63	0	0	0	0	0	0	0.111167	0	0.33017	0.0911453	0	0
ANKRD65	0.0375111	0.100775	0	0	0	0	0	0	0	0	0	0
ANKRD7	0.0303546	0.0408365	0	0	0	0	0	0	0	0	0	0
ANKRD9	0.607987	1.09058	0.79786	7.9002	1.22852	4.55861	2.57879	6.50343	2.78512	4.22867	1.27777	5.89774
ANKS1A	2.66565	3.86536	2.36273	6.53465	3.35497	4.11921	3.40117	5.90327	3.41672	4.1337	2.72616	5.85108
ANKS1B	0	0.0547401	0.0284781	0	0.109624	0	0	0	0.124262	0.137213	0	0
ANKS1B	0.0812841	0	0	0	0	0	0	0	0	0	0	0
ANKS1B	0	0	0	0	0	0	0	0	0	0	0	0
ANKS1B	0	0	0	0	0	0	0	0	0	0	0	0
ANKS1B	0.0215853	0	0.00890614	0	0	0	0	0	0	0	0	0
ANKS3	0.826082	2.96165	0.515284	1.57393	2.29651	2.92495	1.5198	1.0052	1.96708	0	0.764678	3.77241
ANKS3	4.61475	2.66114	3.92884	8.92501	4.25254	3.93708	2.07419	8.52027	5.21478	4.29333	1.16026	4.93936
ANKS4B	0	0.0190692	0.0297619	0	0.114566	0	0	0	0.0649319	0	0	0
ANKS6	3.46381	2.96964	1.47031	5.79149	2.81827	2.77582	1.31562	4.08006	2.77217	1.997	0.605633	2.97708
ANKUB1	0.049969	0.0224081	0.0349729	0	0	0	0	0	0	0	0	0
ANKZF1	17.5014	12.666	4.03497	9.66448	19.3846	18.6587	3.27636	9.75268	17.9352	15.8134	1.81261	8.71321
ANKZF1	12.8123	10.0123	1.54203	5.5634	6.35557	0	3.37181	0	5.86296	0	1.86542	0
ANLN	0.0863546	0.0813221	0.0181317	0.115087	0.0348982	0	0	0.0335893	0.0395581	0.0218405	0	0
ANO1	0.00856721	0.0253322	0	0	0	0	0	0	0	0	0	0
ANO1	0	0.0277785	0	0	0	0	0	0	0	0	0	0
ANO10	2.10798	2.41313	0.842603	1.91998	1.62482	2.08698	0.881525	2.08101	2.08092	2.11485	1.27502	1.99496
ANO2	0.0332455	0.0149086	0.0116341	0	0	0	0	0	0	0	0	0
ANO3	0	0	0	0.018496	0	0	0	0	0	0.0175504	0	0
ANO4	0.0199957	0.0134503	0.0209922	0	0	0	0	0	0	0.0252862	0	0
ANO5	0.371119	0.490952	0.103897	0	0	0	0.0572403	0	0.113337	0.0312874	0.103995	0
ANO6	9.05702	6.14857	1.93644	4.34946	12.3724	7.8512	4.33748	7.73739	11.3596	8.69824	3.63167	9.17357
ANO6	0	0	0	0	0	0	0	0	0.325218	0	0.373546	0
ANO7	0.0598708	0.0805453	0.126513	0.398955	0.0403257	0	0	0.465758	0.274262	0.126186	0	0.145193
ANO8	10.5049	11.7352	2.82476	3.59817	13.5791	17.2633	4.01574	1.96803	18.7432	12.9293	2.6688	2.23749
ANO9	38.1681	36.6415	16.696	7.67593	55.5846	57.7819	27.711	7.52341	59.3313	50.5495	25.9557	8.86008
ANP32A	23.7191	14.7639	16.9925	126.355	27.6766	19.8029	12.83	97.0031	27.4698	19.56	13.1995	77.411
ANP32A-IT1	0.740712	0.185787	0.408584	0.702726	0.507359	0.265784	0.27109	0.292998	0.517595	0.222266	0.10554	0.365351
ANP32AP1	0.111629	0	0.0585962	0.14877	0	0.295405	0	0.434203	0	0	0	0.812139
ANP32B	92.2722	94.9191	79.2094	295.203	110.324	131.804	72.3383	242.711	119.1	108.112	58.3913	216.229
ANP32C	0.116854	0	0	0.155734	0	0	0.180232	0	0	0	0	0
ANP32D	0.104018	0	0	0	0	0	0	0	0	0	0	0
ANP32E	0	0.227271	0.155933	0	0.690014	0	0.823544	0	0.577192	0.826635	0	0
ANP32E	13.7201	11.1723	19.4899	46.6502	19.2264	16.7197	20.3974	63.2826	23.367	16.6117	16.9617	54.0464
ANPEP	0.936675	0.865388	0.284344	0.240641	1.59623	1.55294	1.07917	0.658442	2.27464	2.28338	1.70766	0.738935
ANTXR1	0	0.047142	0.0146764	0	0.0709567	0	0	0.28043	0.0640394	0	0	0.0508534
ANTXR2	2.46107	3.2778	6.62074	0.681977	6.13148	4.93191	17.7192	1.87223	12.8229	8.3622	31.1463	2.49516
ANXA1	48.6403	73.7549	94.2157	5.65051	133.148	130.12	368.294	25.7682	148.094	179.837	404.072	25.9194
ANXA10	0.0569331	0	0	0	0	0	0	0	0	0	0.119653	0
ANXA11	75.4658	81.1572	42.4908	69.2787	116.214	120.014	55.2862	76.0574	116.833	113.983	53.7683	90.8206
ANXA13	0	0	0.0579459	0	0	0	0	0	0	0	0	0
ANXA2	5.40147	3.2643	9.05239	2.42563	33.4821	24.3216	58.7817	23.9465	46.1883	40.2215	95.0787	44.8836
ANXA2P1	0.061342	0.0825245	0.0321996	0	0.12395	0.16233	0	0	0	0	0.257838	0.223142
ANXA2P2	0.0943308	0	0.0330107	0	0	0	0	0	0.288079	0.159052	0.3965	0.228763
ANXA2P3	0	0	0.0320326	0.0813278	0	0	0	0	0	0	0	0.221985
ANXA2R	23.3612	22.1486	5.39696	1.21414	19.3288	18.9423	7.42711	0.632784	21.7607	19.9965	7.38504	0.71014
ANXA3	0	0	0.0267268	0	0	0	0	0	0	0	0	0
ANXA4	1.76918	1.16418	0.242263	1.48645	4.89601	3.05335	0.533882	3.51558	4.49267	4.13409	1.37411	3.91737
ANXA5	15.9458	12.4762	6.81519	5.49306	35.9163	25.2231	18.1179	26.0522	45.4324	41.6977	22.9552	37.2959
ANXA6	1.26618	0.654635	0.101802	0.842281	1.01154	0	0.458266	0.749632	1.4561	0	0	0
ANXA6	90.4747	73.5679	19.5877	25.5763	152.976	138.004	30.1799	40.568	160.682	147.529	36.1088	57.2912
ANXA7	21.6998	25.6971	43.0841	62.4274	24.7589	25.8993	46.351	69.6184	25.2407	28.8135	40.8567	57.4184
ANXA8	0	0	0	0	0	0	0	0	0	0	0	0
ANXA8	0	0	0	0	0	0	0	0	0	0	0	0
ANXA8L1	0	0	0	0	0	0	0	0	0	0	0	0
ANXA8L1	0	0	0	0	0	0	0	0	0	0	0	0
ANXA8L2	0	0	0	0	0	0	0	0	0	0	0	0
ANXA9	1.60338	0.850672	0.213375	0.18058	0.456317	0.47809	0.208987	0.439202	1.34484	0.456926	0	0.164298
AOAH	3.51844	3.397	1.49073	0.269504	0.887799	0.741038	0.78119	0.409675	1.20454	1.12485	0.425496	0.510216
AOAH-IT1	0	0.0967106	0.0754695	0	0	0	0	0	0.329306	0	0	0
AOC2	0.529735	0.493087	0.973174	1.78955	0.965123	0.505587	1.08096	0.68138	0.875412	0.644433	0.601871	0.811182
AOC3	0.0921044	0.165213	0.290084	0.709219	0.16543	0.216655	0.315687	0.358258	0.04688	0.336479	0.172063	0.223363
AOC4	0	0	0.0208606	0.0529631	0.0803012	0	0	0	0	0.0502552	0	0
AOX1	0.0250503	0.0224671	0	0.0222567	0.101235	0	0	0	0.038251	0	0	0
AOX2P	0.0110343	0.0593787	0.0115843	0	0	0	0	0	0	0	0	0
AP1AR	4.46087	2.73214	3.22515	9.39998	4.74808	3.49155	3.59239	9.82199	4.50008	3.07028	3.00775	9.07648
AP1B1	16.8012	15.8345	23.1786	64.0238	22.0632	23.8823	25.1742	66.7831	20.7624	20.5891	23.7149	64.7879
AP1B1P1	0	0	0.10458	0	0	0	0.153644	0	0	0	0	0
AP1G1	10.0883	13.5396	15.3967	12.2648	8.85923	8.35093	14.3614	16.0707	7.03475	12.7192	13.7461	12.9694
AP1G2	80.2522	66.6806	29.7579	23.3394	87.7741	70.4208	33.2239	21.671	86.2761	64.9489	33.0504	26.2584
AP1M1	23.3515	18.5185	17.8483	40.6997	32.3026	24.0679	29.8661	37.8944	27.6419	24.4628	25.3634	42.7554
AP1M2	0.117622	0.126591	0.0493935	0.125406	0.475341	0	0.0725664	0.0915025	0.107762	0	0.0988796	0
AP1S1	3.46171	2.56354	0.433441	11.0046	5.51887	7.90009	0.979675	12.7238	10.6203	7.06843	1.6019	8.78011
AP1S2	4.18587	3.10694	2.78444	2.64502	5.17695	3.24674	4.11858	3.43882	4.13255	3.6506	4.55028	3.93797
AP1S3	0.15439	0.152316	2.80946	5.32228	0.0831906	0.32685	1.80975	4.84426	0.235747	0.234286	2.76883	4.26829
AP2A1	11.991	12.1222	7.49083	37.576	20.0383	24.6127	10.3982	40.6293	21.4829	16.4409	8.33686	46.2822
AP2A2	15.8263	12.0585	5.9647	14.0351	15.3548	13.8642	8.57193	12.8282	12.243	10.654	7.36521	13.5637
AP2B1	23.3984	14.6229	21.3444	24.9394	22.8882	12.305	19.0655	28.6294	21.2861	14.7727	21.207	26.9306
AP2M1	63.7747	58.4903	44.8513	138.473	92.7716	90.2641	69.0421	149.715	98.6317	88.4205	68.3346	148.756
AP2S1	14.069	14.7552	18.1712	66.3851	25.9997	26.2042	21.2973	63.7082	28.5322	23.0862	22.1729	62.2793
AP3B1	7.49211	7.3683	5.09902	11.7064	6.47315	5.46937	5.41918	13.0637	8.89968	7.23974	5.08208	10.9015
AP3B2	0.189001	0.179482	0.163405	0	0.0898593	0.0588418	0.0342952	0	0.050929	0.0843555	0	0
AP3D1	27.1582	21.9031	31.2902	58.5892	41.9145	42.6758	46.034	71.0854	40.0422	36.7997	43.0984	82.0021
AP3M1	5.39361	4.04569	8.83639	10.6998	4.44369	1.99143	5.1985	12.091	3.70494	2.1812	5.70761	10.6495
AP3M2	10.6953	14.8891	14.9082	6.29341	8.46388	7.29442	19.159	8.4745	6.1997	6.73679	19.3802	7.76147
AP3S1	6.74269	4.77198	4.22711	8.94354	10.4605	7.94912	6.99886	10.6897	8.6368	8.89038	5.10415	10.2295
AP3S2	2.45679	1.65293	1.1444	2.14658	2.95997	2.08745	0.817768	1.323	3.39694	1.62413	0.933536	1.41373
AP4B1	2.40675	3.29861	0.799549	1.80687	2.58158	0.808102	2.8965	4.99977	1.13263	3.53285	1.08631	5.36738
AP4B1	6.48709	8.26098	9.49717	7.45992	5.67027	7.97487	6.32092	3.38773	6.6007	5.26982	7.45796	2.09955
AP4B1-AS1	0.623049	1.07469	1.34271	0.280134	0.275457	0.644042	0.961022	0.200458	0.601143	0.538527	0.96264	0.182512
AP4E1	2.34232	1.28502	1.69576	3.16219	2.08987	0.643998	1.8955	3.52603	2.06236	0.692426	1.12519	2.78854
AP4M1	1.19756	0.998968	1.90038	3.13336	2.82785	1.09052	3.36298	3.31799	2.70934	2.46877	3.58554	5.13489
AP4S1	0	0.150182	0	0.212754	0	0	0.278975	0	0	0	0	0
AP4S1	2.5309	2.8983	3.89034	4.05201	3.05969	1.49031	3.34055	5.03457	2.54335	2.37881	3.64918	2.55349
AP4S1	0.117916	0.0940946	0.058526	0.143021	0.25927	0	0	0	0.228076	0.109198	0	0
AP5B1	7.91969	5.33566	4.81946	8.92325	8.0014	7.56999	6.56994	7.53123	8.61203	6.22389	6.16944	6.81605
AP5M1	6.17481	6.14103	5.07105	5.10421	4.45696	3.66013	5.13079	5.89558	5.17672	2.70016	4.69642	5.97447
AP5S1	4.22103	5.42328	3.85351	10.1219	8.29817	8.65429	5.18071	9.25038	6.22707	6.35414	2.6091	12.0383
AP5Z1	8.05313	9.89019	13.3282	25.1057	10.9488	14.8526	15.5866	21.5699	12.3082	9.96676	11.576	20.1451
APAF1	4.03646	2.32001	0.783988	0.85834	3.44308	2.98743	1.79527	1.15904	2.69827	1.81513	1.87849	1.63918
APBA1	0.262762	0.218833	0.0853846	0	0.278115	0.132448	0.0192989	0.0730047	0.630502	0.601276	0.0525936	0.0910326
APBA2	32.5547	33.2704	30.8146	11.2501	12.4344	11.9256	7.97396	2.62441	3.09056	3.78939	1.77812	0.748041
APBA3	14.3186	14.7284	28.8751	34.0876	23.8214	26.9551	28.6159	33.1133	20.8455	20.7785	26.6367	32.9119
APBB1	1.2545	1.46562	0.416081	0	0	0	0	0	0	0	0	0
APBB1	0.762771	0.353243	0.237611	0.682753	0	0	0.344748	0	0.464757	0	0	0
APBB1	1.41327	0.208129	0.1899	0	0.695071	0	0.291898	0	0.340152	0	0	0
APBB1	41.1451	39.7203	17.2494	14.7606	27.4646	29.5259	14.7337	11.475	21.49	20.2634	12.5502	19.6715
APBB1	0	0.674365	0	0.3543	0	0	0	2.33672	0	0	0	0
APBB1IP	40.2851	32.4464	120.45	27.1463	55.7406	41.5846	76.1323	38.035	60.6076	41.0869	70.4503	36.5934
APBB2	0	0	0	0	0	0	0	0	0	0	0	0
APBB2	0	0	0	0	0	0	0	0	0	0	0	0
APBB2	0.0322069	0.0309294	0	0.473005	0	0	0	0.323501	0	0	0	0.133934
APBB3	13.7915	14.8071	7.5621	4.71027	13.9727	15.351	6.34003	3.58629	13.7266	11.3194	4.52132	3.21417
APC	3.26805	1.69269	1.40699	0.907863	1.76584	1.98024	1.78745	1.12311	1.65909	1.5947	1.48933	0.907263
APC	1.92629	1.05327	1.1791	1.75251	2.03773	0.565575	1.24313	2.07884	1.72241	0.805497	1.37193	1.64055
APC2	0.346902	0.377364	0.234827	0.346649	0.541161	0.622821	0.31629	0.205415	0.448195	0.492621	0.341125	0.177133
APCDD1	0	0	0	0	0.0649744	0	0	0	0	0	0	0.116971
APCDD1L	0.119126	0.0534208	0.0277918	0	0	0	0.0408303	0	0	0.0669531	0.111271	0
APCS	0	0	0	0	0	0	0	0	0	0	0	0
APEH	20.6852	17.5207	7.29096	50.1988	24.6256	22.2119	7.97028	52.5162	23.3984	18.8867	6.40323	49.9827
APEX1	68.0693	61.522	78.4945	173.966	57.1497	51.1679	49.1579	174.439	58.8998	54.0253	44.5319	175.717
APEX2	5.64633	5.12948	12.7523	26.7123	7.07284	4.19036	10.669	26.0146	6.29928	4.58451	11.9104	24.4048
APH1A	31.8279	38.6116	35.6523	59.5463	51.3557	52.009	46.8005	54.3305	52.1556	54.8118	44.6894	53.3956
APH1B	1.35699	1.63229	1.09117	0.23534	0.940068	0.588813	0.936146	0	0.834037	0.818912	0.85032	0
API5	9.96197	7.20707	16.7287	24.1005	9.68707	5.73105	15.1421	26.153	8.60849	5.64593	14.2838	22.5213
APIP	1.96989	2.28879	4.62179	13.1176	1.63133	2.00761	3.43912	11.9171	2.92153	1.93794	4.14176	7.82599
APITD1,APITD1-CORT	0.0597114	0.138039	0.939023	2.50906	0	0.311876	0.86502	2.05984	0.194981	0.16086	1.41943	2.16331
APITD1,APITD1-CORT	1.72587	1.35443	1.16002	3.44656	1.13058	1.1237	1.26203	2.89629	1.84141	1.65688	0.564002	2.30323
APLF	0.770528	0.561495	0.370759	0.456399	1.03797	0.509764	0.429158	0.749279	1.0295	0.433064	0.67474	0.545013
APLN	0	0.0343767	0.0134132	0.0681095	0.0516329	0	0	0.0993926	0	0.0323136	0	0.0929526
APLNR	0	0	0	0.0283262	0.0429475	0	0	0	0	0	0	0
APLP1	0.067292	0.203691	0.600489	0	0.203959	0	2.75041	0	0	0.893511	3.25275	0.244786
APLP2	13.5742	12.8753	28.6505	34.8356	15.5091	14.3065	33.6284	35.9662	16.3552	16.4061	31.8602	35.4209
APLP2	0.335669	0	0.0820255	0	0	0	0	0	0	0	0	0
APMAP	11.3132	11.3276	27.6676	38.9044	17.1636	20.3187	26.6599	38.0894	16.9916	16.3703	25.1015	34.8119
APOA1	0.505131	0.432449	0.192838	0.1224	0.556737	0.243042	0.566617	0.178619	0.210359	0.232283	0.579058	0.33409
APOA1BP	14.8817	19.7735	17.5522	88.6372	24.5019	28.7826	17.6824	72.4639	23.2288	24.6275	16.0628	63.3577
APOA2	0	0.234314	0	0	0	0	0	0.338733	0	0	0	0
APOA4	0.0282131	0.0379556	0.0296192	0	0.114017	0	0	0	0	0	0	0
APOA5	0	0.0865896	0	0	0	0	0	0	0	0	0	0
APOB	0.00583402	0.0117729	0	0	0.0235769	0	0	0	0.0133625	0.0073776	0	0
APOBEC1	0.184714	0.0621247	0	0	0.186619	0	0	0	0	0	0.194101	0
APOBEC2	1.21002	0.746104	0.291116	0.470347	0.713128	0.533682	0.155525	0.0980544	0.577393	0.637571	0.211919	0.550207
APOBEC3A,APOBEC3A_B	0.0398971	0	0	0	0	0	0	0	0	0	0	0
APOBEC3B	0.0993918	0.15125	0.44319	0.299602	0.454014	0	0.520548	0.656084	0.385577	0.213103	0.827707	0.817765
APOBEC3C	16.1942	11.7426	9.70944	21.3843	39.7773	23.3932	26.696	50.8546	45.9395	32.3152	36.3762	60.5303
APOBEC3D	4.08126	2.50176	1.39943	3.28983	4.78843	2.09038	3.85811	6.6572	7.01093	3.24649	5.81047	6.70477
APOBEC3F	2.0546	0.929367	1.35465	1.60246	3.04914	1.10496	2.34211	2.69546	2.65382	0.99957	3.52306	2.81145
APOBEC3G	7.61384	5.65029	7.85183	5.74705	13.7056	10.5795	29.2372	23.5002	17.1819	13.5194	49.6569	26.9613
APOBEC3H	0.196448	0.34154	0	0	2.38169	1.4902	1.57612	0	3.00143	1.68247	4.15211	0
APOBEC4	0.0148276	0.0199479	0.0155666	0	0	0	0	0	0	0	0	0
APOBR	9.38532	9.08973	3.4098	3.61922	46.3572	54.0998	13.3363	6.16884	78.5222	65.2767	14.1999	8.21905
APOC1	0	0	0	0	0	0	0	0	0	0	0	0.650063
APOC1P1	0.131601	0	0.0767201	0	0	0	0	0	0	0	0	0
APOC2	0	0	0	0	0	0	0	0	0	0	0	0
APOC3	0.154563	0.103968	0	0	0	0.409022	0	0	0	0.195458	0	0
APOC4,APOC4-APOC2	0.0450422	0.0908942	0	0	0	0	0	0	0	0	0	0
APOD	0.0364523	0.04904	0	0	0	0	0	0	0	0	0	0
APOE	0.523616	0.798354	0.43977	0.372178	0.423215	1.29327	0.430725	0.407341	0.799543	1.23602	0.586909	0.253965
APOF	0.0731636	0.0984284	0.0256033	0.0650045	0	0	0.15046	0	0	0.185043	0	0
APOH	0.0342974	0	0.0360067	0	0.138605	0	0	0	0	0	0	0.249525
APOL1	3.52588	1.85168	1.78866	26.083	8.02054	5.19874	3.35446	36.2083	7.54557	4.48784	3.76096	43.8567
APOL2	5.51103	3.61451	1.97104	23.4469	7.26033	5.52518	2.87079	31.1313	6.96937	5.46479	2.6532	32.3818
APOL2	5.22173	3.42477	1.86758	22.216	6.87921	5.23514	2.72009	29.4971	6.60352	5.17792	2.51392	30.682
APOL3	28.4206	25.0077	11.8019	7.45913	37.0767	30.1757	28.5852	15.0966	37.2375	36.8791	24.8223	15.3476
APOL3	0.416418	0	0.683043	0	2.70849	1.12339	0	0	2.89335	3.0901	0	2.26726
APOL4	0	0	0	0	0	0	0	0	0	0	0	0.27812
APOL5	0	0	0.0601865	0	0	0	0	0	0	0	0	0
APOL6	9.51471	7.69549	12.8892	15.3335	8.29121	8.36429	14.3368	16.1501	9.65886	9.936	16.3763	17.3204
APOLD1	0.5913	0.620012	0.282996	0.162202	0.491978	1.28863	0.295035	0.473191	0.955985	0.923689	0.5117	0.316274
APOLD1	0	0	0	0	0	0	0	0	0	0	0	0
APOM	1.34338	2.02436	0.811141	0	1.64367	0	0.53889	0	0	3.02515	2.73617	0
APOM	0.537409	0.54429	0	0.649233	0	0.859431	0.598926	0	0.800738	0	0	0
APOO	1.84129	1.6402	1.17875	6.16735	2.09794	2.05763	0.914698	4.16078	2.91153	1.78904	1.78089	3.78666
APOOL	2.00456	1.32818	1.47111	4.24434	1.19966	0.943906	1.00136	3.35703	1.45888	1.15987	0.74963	2.96574
APOPT1	5.03632	3.814	6.19773	16.18	7.95255	7.76712	6.07026	13.2328	10.5423	7.42328	7.71061	11.6474
APP	0	0	0	0.295266	0.410388	0	0.166325	0	0	0	0	0
APP	22.4148	23.5676	12.9158	64.5499	19.4381	23.3873	12.9288	48.852	21.0863	17.4309	8.82265	36.8559
APP	0	0	0	0	0	0	0	0	0	0	0	0
APPBP2	5.91629	3.58125	3.34292	3.4289	3.75755	3.26946	4.12545	3.93864	3.52995	2.25496	3.45313	3.38228
APPL1	6.68472	5.64691	2.57485	6.78631	5.97262	4.31258	3.3816	6.86003	6.07252	4.67801	2.94278	6.22547
APPL2	0.936202	1.29434	0.437677	0.226863	0.432615	0.436676	0.968667	0.291999	0	0.128505	0.408122	0
APPL2	9.74925	8.47834	3.77669	2.48254	6.9636	4.40492	5.2979	3.16759	5.6506	5.37022	4.71923	4.4407
APRT	48.4097	66.2328	72.9817	335.365	81.9239	102.43	60.2519	270.701	93.3839	99.9588	71.5423	253.141
APTX	1.33155	2.34454	3.35947	6.98548	0.802722	0	0.661699	1.39181	0	2.05455	3.15606	0.596885
APTX	0	0	0	0	0	0	2.21567	0	0	0	0	0
APTX	2.05044	1.32903	4.53321	6.98027	3.05289	3.16431	2.07874	12.7657	4.29863	2.82814	1.7621	9.92612
AQP1	0.0365986	0.039118	0.0154058	0	0	0	0	0	0	0.111196	0	0
AQP1	0	0	0	0	0	0	0	0	0	0	0	0
AQP1	0	0	0	0	0	0	0	0	0	0	0	0
AQP1	0.0422071	0.0451127	0	0	0	0	0	0	0	0	0	0
AQP10	0	0.0618818	0	0.0613024	0	0	0	0	0.105356	0	0	0
AQP11	0.97573	0.437556	0.180769	0.509951	0.541222	0.607549	0.177051	0.223252	0.350566	0.0967757	0.0804172	0.139191
AQP12A	0	0	0	0	0	0	0	0	0	0	0	0
AQP12B	0	0	0	0	0	0	0	0	0	0	0	0
AQP2	0	0	0	0	0	0	0	0	0	0	0	0
AQP3	41.4993	33.7052	28.683	1.70176	141.286	136.328	93.9227	3.16845	141.998	126.953	101.607	3.52375
AQP4	0	0	0	0	0	0	0	0	0	0	0	0
AQP4	0	0	0	0	0	0	0	0	0	0	0	0
AQP5	0	0	0	0	0.0914137	0	0.069777	0	0	0	0	0
AQP6	0	0.0208799	0	0	0.0627221	0	0	0	0	0	0	0
AQP7	0.36075	0.220602	0.03443	0	0.132535	0	0	0	0	0.0829451	0	0
AQP7P1	0	0	0.0135988	0	0	0	0.0399572	0	0.0593371	0.0327607	0	0
AQP7P3	0	0	0	0	0	0	0	0	0	0	0	0
AQP8	0.125967	0.0847327	0	0	0.127266	0.333347	0.194287	0	0.14426	0.238943	0	0.229113
AQP9	0.0136349	0	0.0143145	0	0	0	0	0.212143	0	0	0	0.297596
AQPEP	0.0356556	0.0599602	0.0187163	0.0237595	0	0	0	0	0	0	0	0
AQR	8.79771	8.93406	10.9727	14.5886	6.55372	4.93524	10.7804	15.3282	5.94306	6.07028	8.92957	13.3322
AR	0.0270431	0.00780056	0.0121072	0.0206067	0.0624744	0.0406868	0	0	0.0354152	0	0	0
AR	0	0.0102532	0	0	0	0	0	0	0	0	0	0
ARAF	36.7889	48.2607	49.4332	52.4	48.8732	56.2953	53.0618	57.0192	48.6273	53.0658	44.2819	71.1205
ARAP1	15.2411	10.9523	7.72711	13.5953	11.0119	10.0055	7.83844	13.3659	9.14408	8.52515	7.53499	13.8493
ARAP1	5.88913	9.2813	2.09594	11.4207	12.5702	16.1673	6.23717	9.66516	16.2263	11.036	2.60262	9.73764
ARAP2	5.87485	4.56148	8.87554	2.37123	7.8009	4.82688	11.2877	5.61491	6.92025	6.01414	13.6874	6.51299
ARAP3	0.133077	0.231686	0.246545	0.730281	0.822515	0.911478	1.13493	0.91346	1.00406	0.890927	1.05291	1.6516
ARC	0.125967	0.320101	148.114	1.60417	0.226251	0.592617	95.1144	0.762179	0.192347	0.601782	77.421	1.12011
ARCN1	21.3723	20.8095	67.4765	54.2531	24.5404	15.8557	55.1962	62.7161	26.555	21.2406	57.0095	60.8378
AREG	0.166362	0.939999	1.88625	0.0886854	0.403387	0.880489	1.43691	0	0.152417	0.504907	1.11883	0
AREG	0	0	0	0	0	0	0	0	0	0	0	0
ARF1	77.2669	133.235	174.476	275.502	151.622	194.777	264.94	297.683	168.162	212.073	238.732	309.225
ARF1	2.9592	7.53663	3.18533	1.25343	11.229	8.66891	4.52738	5.91733	6.86497	7.75263	7.25217	10.1397
ARF3	16.6185	14.9623	18.376	42.6195	32.2387	28.6611	25.8295	43.1695	35.103	29.3657	24.3774	48.2944
ARF4	14.0381	21.1788	51.197	35.651	14.3504	14.0328	50.6065	49.7237	14.9652	19.2791	52.7375	45.813
ARF5	31.7578	42.876	32.1963	57.9015	60.6016	76.5816	55.4165	54.5277	63.1843	68.4388	47.8658	63.9826
ARF6	24.334	29.6842	50.5996	60.5685	46.6979	72.7804	116.967	85.7847	58.6818	60.5132	109.228	90.6113
ARFGAP1	12.9929	18.9999	26.5143	40.5042	20.2735	26.2489	29.0453	38.3745	25.8447	24.1795	26.3337	36.6053
ARFGAP2	20.2662	24.8332	18.1443	29.2243	24.1536	22.7229	23.7753	30.2725	27.5074	22.0312	18.6736	26.5762
ARFGAP3	7.91518	6.06289	25.5421	5.50259	9.34192	6.83403	25.6975	11.9882	10.6543	9.19373	29.1401	11.0961
ARFGEF1	13.5859	12.9315	11.8091	8.7986	9.3773	7.60391	15.2477	10.1787	7.4171	7.74313	15.8401	8.50301
ARFGEF2	10.1743	7.89623	10.8734	9.85255	7.09933	5.42359	11.4589	9.62678	5.8259	5.38019	8.13388	8.7534
ARFIP1	1.97607	1.03623	0.519849	2.383	2.77937	1.52829	1.33605	3.42197	2.64515	0.939072	0.924699	3.19836
ARFIP2	6.526	7.207	9.73759	17.1431	7.61593	7.79856	8.94462	14.6776	5.7533	7.03977	8.59942	16.6474
ARFRP1	3.06886	0	3.30207	4.16219	0	5.46586	4.68354	5.486	0	0	0	5.21414
ARFRP1	6.82226	10.7594	4.9486	14.5581	13.3247	8.03933	6.09929	11.2618	12.1054	9.61345	8.19089	13.9117
ARG1	0.652019	0.186721	0.0874263	0	0.560901	0	0	0.215946	0	0.140412	0	0
ARG2	1.11768	3.64459	4.90089	2.40665	1.43443	1.64216	3.51636	2.76189	0.43385	1.27342	2.45126	3.18693
ARGFX	0.0406625	0.0328224	0.00853781	0.0216767	0	0	0	0	0.0745082	0.0411368	0.0341833	0
ARGFXP2	0.821086	0.138078	0.251419	0.273569	0.414778	0.181071	0.316604	0.399221	0.626884	0.173055	0.143803	0
ARGLU1	110.094	81.7145	97.651	71.1049	124.254	125.75	89.4019	65.1498	115.737	101.918	83.3555	69.4859
ARHGAP1	18.8095	18.9413	10.6041	29.4509	26.931	22.6875	13.6031	32.1496	29.0035	21.8078	11.8049	38.6249
ARHGAP10	1.38831	0.906662	2.23578	0.718538	2.50568	1.85479	6.23677	2.20199	4.19865	2.69311	6.00545	3.03994
ARHGAP11A	0.473318	0.276093	0.0537315	2.01317	0.379287	0.542708	0.113038	1.28322	0.637777	0.332357	0.0612222	0.693251
ARHGAP11B	0.364523	0.108978	0.127564	0.431829	0.654727	0	0.12494	0.315085	0.556614	0.204875	0	0
ARHGAP12	8.45149	7.13278	1.21274	0.947395	4.18954	4.12817	1.79692	0.729673	3.75394	3.82056	0.913001	0.718311
ARHGAP15	42.2683	30.7792	16.5207	3.5578	36.8133	24.416	20.3707	6.37604	34.7562	32.0414	16.6347	8.34808
ARHGAP17	14.5563	16.1893	31.9631	23.9115	17.805	14.6577	23.357	25.5649	18.3672	18.4425	21.5026	28.6343
ARHGAP18	0.765197	0.712685	0.383128	0.878591	1.3321	1.24612	0.944173	1.05318	1.13248	1.25051	0.989644	0.685177
ARHGAP19	0	0	0	0	0	0	0	0	0	0	0	0.700473
ARHGAP19,ARHGAP19-SLIT1	3.23709	2.36428	0.465089	2.92274	2.85623	2.26238	0.375773	1.89094	2.97324	2.14377	0.416885	1.44633
ARHGAP20	0.0103536	0	0.0139487	0	0	0	0	0	0	0	0	0
ARHGAP20	0.0108801	0.0089437	0	0.0177199	0	0	0	0	0	0	0	0
ARHGAP20	0.0106667	0	0	0	0	0	0	0	0	0	0	0
ARHGAP21	1.29315	1.39176	0.567174	0.55149	0.720022	0.638787	0.655973	1.34132	0.921477	1.03205	0.917993	1.46348
ARHGAP22	0	0	0	0	0	0	0	0	0	0	0	0
ARHGAP22	0	0	0	0	0	0	0	0	0	0	0	0
ARHGAP22	0	0	0	0	0	0	0	0	0	0	0	0
ARHGAP22	0	0.0336155	0.0524012	0	0.0504897	0	0.0385392	0	0	0	0.0525139	0
ARHGAP23	0.0139489	0.0281486	0.0292882	0.07436	0	0.0369131	0.193629	0.244156	0.127797	0.0176395	0.146578	0.304449
ARHGAP24	0	0	0	0	0	0	0	0	0	0	0	0
ARHGAP24	0	0	0	0	0	0	0	0	0	0	0	0
ARHGAP24	0.0269848	0.048306	0	0	0	0	0	0	0	0	0	0
ARHGAP25	23.0808	15.034	6.4038	10.0862	19.3456	12.5544	16.2302	20.2623	17.1022	15.1858	34.2902	21.3526
ARHGAP25	9.30051	9.14974	3.59588	3.55796	9.37508	10.226	7.13066	2.51965	8.66268	3.21529	5.27802	4.08779
ARHGAP26	2.65226	1.94381	1.17988	1.08827	1.91959	1.59584	1.13068	1.33538	1.6891	1.79519	1.26757	1.51858
ARHGAP26-AS1	0.0843216	0.0567197	0	0.224754	0	0	0	0	0	0	0	0
ARHGAP27	20.8551	14.7875	6.43329	18.8603	26.5431	20.8452	10.6873	16.7244	25.5897	16.1834	8.9178	19.6228
ARHGAP27	0.538446	0.563408	0.314045	0.0797331	0.604446	1.89986	1.10731	0.23271	1.64438	1.2105	0.377207	0.217632
ARHGAP28	0.0297893	0	0.0234554	0	0	0	0.022973	0	0	0.0188355	0.0313032	0
ARHGAP29	0.0542167	0.00607823	0.0142297	0.0120426	0.0182587	0	0	0	0.0206967	0	0	0
ARHGAP30	75.7307	55.997	31.2112	40.5111	99.6518	96.1818	62.6697	55.1168	118.587	79.7759	54.8942	62.2031
ARHGAP31	1.19306	0.939706	8.36083	4.62055	3.44097	2.94133	22.3647	6.88162	3.57345	3.41719	28.6099	8.56862
ARHGAP32	0.236416	0.573268	0	0	0.228647	0.484716	0.134474	0.271303	0.14353	0.150455	0.0916175	0
ARHGAP32	0.781381	0.330554	0.21799	0.597036	0.313297	0	0	0	0.145884	0.168591	0	0.295944
ARHGAP33	6.05901	6.02448	1.31822	1.22286	9.33974	9.00076	1.68631	1.84009	12.5693	9.04641	1.70032	1.34916
ARHGAP35	4.94497	5.90439	2.46191	4.43469	9.53312	13.1227	4.88927	5.73248	12.3134	14.1828	5.14272	6.54115
ARHGAP36	0	0	0	0.0355661	0	0	0	0	0	0	0	0
ARHGAP39	0.128147	0.258597	0.134533	1.19549	0.194203	0.381505	0.247062	0.716523	0.366891	0.405129	0.437643	0.640963
ARHGAP4	107.618	131.297	64.7702	40.2135	154.606	223.94	94.7329	32.4178	160.4	140.041	68.842	34.74
ARHGAP40	0.0580566	0.0585784	0.030475	0	0	0	0	0.0564556	0	0	0	0.105595
ARHGAP42	0.0346727	0.0349843	0.0182003	0.0231045	0.0350304	0	0	0	0.0397079	0	0	0
ARHGAP44	0.186329	0.0537132	0.0508036	0.0515942	0.195564	0.102448	0	0.0423539	0.0443355	0.0489563	0	0.140827
ARHGAP5	3.61186	2.86237	1.81563	1.40254	4.06518	2.0206	2.64647	1.61848	3.48465	2.41936	2.28988	1.27955
ARHGAP5-AS1	0.803886	0.432593	0.472612	0.428542	0.519795	0.850933	0.297573	0.25015	0.589202	0.243979	0.135159	0.467883
ARHGAP6	0	0	0	0	0	0	0	0	0	0	0	0
ARHGAP6	0.0226566	0	0	0	0	0	0	0	0	0	0	0
ARHGAP8	0	0.326384	0	0	0.868988	0	0	0.208272	0	1.7045	0	0.782603
ARHGAP9	38.6093	44.0267	28.3029	13.6216	41.6139	45.1898	54.0382	12.3915	40.894	39.5737	32.5411	13.7552
ARHGAP9	5.77625	10.0018	6.71326	4.38951	4.6781	10.6941	9.41875	6.138	4.70875	8.99454	8.41506	8.09067
ARHGAP9	8.37321	16.8692	33.8821	5.32229	6.47881	11.0735	30.0177	4.48145	4.03786	9.65303	26.8935	5.8223
ARHGDIA	11.7563	11.3316	10.9064	21.631	29.0038	16.5492	16.4727	18.3193	18.3729	13.0207	11.7445	20.8657
ARHGDIA	116.104	240.017	425.101	622.523	315.85	454.157	450.965	633.32	422.202	456.534	404.097	685.55
ARHGDIB	529.184	550.096	372.34	118.641	597.136	544.485	339.29	128.862	607.353	627.73	298.863	130.617
ARHGDIG	0	0	0.0459066	0	0	0	0	0	0	0	0	0
ARHGEF1	205.978	212.127	95.6816	53.3217	226.988	269.181	131.817	56.82	221.245	197.512	92.0432	59.3855
ARHGEF1	47.8362	53.1442	44.7958	14.3766	65.3775	44.9659	35.4438	13.8981	50.6673	35.1353	23.776	10.0787
ARHGEF10	7.11691	5.74867	2.46733	6.91235	3.60261	2.88547	1.31814	4.38451	3.03743	2.236	0.929019	4.02002
ARHGEF10L	0	0	0	0	0	0	0	0	0	0	0	0
ARHGEF10L	0	0	0	0	0	0	0	0	0	0	0	0
ARHGEF11	5.50696	4.87073	0.421444	0.258877	4.5733	3.99254	0.337294	0.330495	2.78653	2.80047	0.203978	0.307414
ARHGEF12	0.632435	0.606574	0.300742	4.1936	2.33303	1.51617	2.07999	5.73541	2.76039	2.34496	2.24956	7.23626
ARHGEF15	0.0146971	0.0131815	0.0102864	0	0	0	0	0	0	0	0	0
ARHGEF15	0.0149243	0.0133853	0.0104454	0	0	0	0	0	0	0	0	0
ARHGEF16	0.0709214	0.0763295	0.074456	0	0.286612	0.150144	0	0	0	0.107623	0.0596206	0
ARHGEF17	0.00527213	0.00709269	0.00553488	0	0.0213061	0	0	0	0.0483021	0.0266681	0.0443205	0
ARHGEF18	16.5215	32.8864	9.2244	16.6675	51.0114	53.7836	9.23996	16.7882	31.5822	25.1979	6.99741	16.7124
ARHGEF18	32.752	48.0278	3.66094	0.82824	10.8193	42.3299	6.39981	0.908116	26.7478	44.9749	2.9188	1.86052
ARHGEF19	1.64547	1.0794	0.94226	3.26224	1.64871	1.79935	1.00678	2.96216	2.18033	1.61651	0.800243	2.57235
ARHGEF2	4.07984	1.43818	7.00551	0.670342	1.8548	1.68602	3.54529	2.06788	5.41647	4.93762	5.03721	0
ARHGEF2	24.2163	13.8642	120	47.5997	27.6441	16.2829	101.378	60.1712	23.3403	9.65277	116.876	55.6267
ARHGEF25	0	0	0	0	0	0	0	0	0	0	0	0
ARHGEF25	0.354724	0.215673	0.067245	0.685503	0	0.254266	0	0.373971	0	0.121507	0	0.5827
ARHGEF26	0	0	0	0	0	0	0	0	0	0	0	0
ARHGEF26	0.0780351	0.0645077	0.075886	0.123346	0	0	0.0450932	0.0591808	0	0	0	0
ARHGEF26-AS1	0.0951296	0.10665	0.0166451	0	0	0	0	0	0	0.0400997	0	0
ARHGEF3	0.305498	0.346493	0.855326	0.0853832	0.156393	0	0.102174	0	0.387105	0.0842759	0.229049	0
ARHGEF3	40.511	25.9107	127.361	13.7118	26.5903	13.3561	85.834	10.0524	24.753	16.355	73.7803	6.6555
ARHGEF3	2.46078	3.05236	0.34859	0	6.39615	3.79335	1.86883	0	1.04557	2.86979	0.413758	0
ARHGEF3-AS1	0	0	0	0	0	0	0	0	0	0	0	0
ARHGEF33	0.0501231	0.0290977	0	0.0510188	0	0.0506526	0.0356749	0	0.0876822	0	0	0
ARHGEF35	0.0499488	0.0447981	0.0524382	0.0443786	0	0	0	0.323809	0	0.0421096	0.0699831	0
ARHGEF37	0.0169337	0.0341718	0.0088888	0	0.0342167	0	0	0	0	0.021414	0	0.061599
ARHGEF38	0.0754969	0.0101567	0.0396298	0.0415865	0.0305103	0	0.0232888	0.029366	0	0	0	0
ARHGEF38-IT1	0	0	0	0	0	0	0	0	0	0	0	0
ARHGEF4	0.837551	0.913455	0.164254	0.478546	0.48562	0.296373	0.100987	0	0.513148	0.482459	0.140705	0
ARHGEF40	0.0830162	0.142142	0.103	0	0.304992	0.239658	0.605288	0	0.172858	0.801671	0.570995	0.0549064
ARHGEF5	0.195147	0.292828	0.267911	0.420125	0.272992	0.158899	0.324142	0.61309	0.343827	0.284746	0.315485	0.491456
ARHGEF6	34.0614	19.8775	8.42064	6.16789	26.7594	12.2886	8.56095	5.99042	27.0021	17.261	8.28067	6.19947
ARHGEF7	0.74934	0.460628	0.538456	0.584759	0.565705	0.353409	0.298405	0.330037	0.804378	0.51462	0.509362	0.166623
ARHGEF7	10.2032	11.6962	10.9954	11.5142	10.7882	10.0032	15.8857	12.6812	7.79236	10.2439	11.0516	11.0547
ARHGEF7	0	0.251406	0	0	0	0	0	0	0.93319	0	0	0
ARHGEF9	4.63887	3.75528	1.09966	1.47144	3.6748	2.36617	0.83895	1.46132	3.67048	2.95711	0.747605	1.64629
ARHGEF9	0	0	0	0	0	0	0	0	0	0	0	0
ARID1A	39.383	37.7235	38.2605	57.0947	48.3676	49.8723	42.6208	56.7428	55.99	49.0063	38.5445	61.6263
ARID1B	18.4249	20.1763	8.75904	17.5376	25.752	27.1623	10.0765	15.1552	25.0232	24.2889	7.88159	16.9607
ARID2	9.39037	11.5596	7.68238	5.40792	5.58421	5.94851	7.80454	6.96448	5.28231	7.11263	6.33981	6.40703
ARID3A	2.02291	1.93263	1.72361	3.71185	4.26528	2.09475	4.88359	5.41672	4.29761	2.74351	2.15653	7.46532
ARID3B	3.19544	2.79624	3.00801	3.41726	4.23913	4.67786	5.33303	3.92902	4.00431	5.10947	5.02146	5.15835
ARID3C	0.0332455	0	0.0698047	0	0.134354	0	0	0.129315	0	0	0.279481	0
ARID4A	11.3963	9.87857	3.78324	3.15229	10.2285	8.56763	5.52385	3.52741	9.86902	8.82501	3.47763	3.39495
ARID4B	1.50801	0.479446	0.217185	0.221905	1.30517	1.51781	0.286788	0	0.755171	1.07532	0.887453	0
ARID4B	22.6921	14.9216	22.8237	9.40973	17.7689	11.9048	27.7404	10.9853	15.6399	11.0155	21.6146	11.0143
ARID5A	41.3405	141.778	137.338	144.034	54.8593	123.433	206.724	129.426	48.2422	121.086	190.483	156.224
ARID5B	9.24585	5.93289	5.55677	10.0869	9.53857	3.79995	6.56494	8.96495	5.51502	4.39268	8.29549	10.3207
ARID5B	8.82192	5.96998	26.9535	28.6076	15.4492	11.4695	45.9368	37.6701	16.5432	12.3557	53.0019	40.8467
ARIH1	15.634	18.7637	32.0192	23.6689	15.9458	25.3673	38.4265	18.7957	16.3502	22.2206	25.5536	16.4364
ARIH2	20.3773	17.1401	17.5402	28.084	23.0366	20.4517	17.5937	28.8435	19.382	18.8403	18.4716	29.598
ARL1	4.31159	2.90023	7.31511	15.3915	3.99307	2.78454	4.67088	15.9223	3.99722	2.92091	4.09922	9.98931
ARL10	1.71273	1.61292	1.43847	3.10432	2.56099	1.81296	3.32849	2.26508	3.05987	1.29953	2.3757	2.36753
ARL11	0.164326	0.103167	0.0345032	0.0584003	0	0	0	0.0426119	0	0	0	0
ARL13A	0.406984	0.108143	0	0	0	0	0	0	0	0	0	0
ARL13B	0.926856	0.727034	3.74911	3.58164	0.58965	1.03813	3.22834	3.13868	0.825774	1.00363	2.50461	2.77848
ARL14	0.0639614	0.0430242	0.0335746	0	0	0	0	0	0	0	0	0
ARL14EP	7.44698	5.22844	9.30846	13.3984	10.7214	4.68042	9.69131	16.2031	13.3257	7.1807	9.09709	13.7141
ARL14EPL	0	0.0863165	0	0	0	0	0	0	0	0	0	0
ARL15	1.42495	1.42662	0.417481	0.485808	1.60706	1.49081	0.562229	0.773391	0.834921	0.963845	0.348227	0.843827
ARL16	8.2587	7.52949	6.16236	13.7354	14.4812	10.1147	6.73744	11.8141	14.8515	9.49436	4.73369	10.6762
ARL17A	0.136083	0.127983	0.0874959	0.0416591	0.0659741	0.0413601	0.0482124	0.0607934	0.178991	0.0395291	0.0328473	0.0568543
ARL17A	0.164518	0.339015	0.0658778	0.3208	0.0315692	0.0826888	0.0575736	0.0522375	0.270856	0.0554555	0.150459	0
ARL17B	0	0	0	0	0	0	0	0	0	0	0	0
ARL2,ARL2-SNX15	20.7091	16.1107	6.01585	111.922	31.6395	28.3473	6.19065	85.0863	28.5779	23.6808	8.12127	84.3528
ARL2BP	24.6754	21.6119	13.9411	11.0315	23.3843	21.4895	19.6041	9.46066	27.7647	24.8045	17.0665	12.8434
ARL3	1.46731	0.715219	0.290228	1.04861	2.92194	1.29432	1.63996	2.72963	3.01985	2.47405	1.162	4.40932
ARL4A	2.46926	4.69364	1.64544	0.895247	4.68698	7.56532	1.91093	1.27609	5.39736	8.32046	1.81834	1.45645
ARL4A	0.284257	0.652645	0.127696	0	0.414744	0.473241	0.12395	0	0.42094	0.656183	0.278718	0
ARL4C	68.9807	106.033	73.7242	3.50635	162.228	254.398	90.6376	5.75644	193.07	237.964	43.8029	4.86007
ARL4D	0.519762	2.09774	0.300116	0.900507	0.945224	2.7509	0.480999	0.808686	1.30953	1.57747	0.218471	0.189072
ARL5A	6.71776	4.70328	8.17528	15.5067	5.69718	4.25175	6.35717	15.9525	5.56527	3.23435	6.64533	14.3052
ARL5B	3.0988	24.442	14.495	3.97688	2.551	13.7888	16.9938	5.93741	2.20815	20.6675	11.7709	5.34396
ARL5C	0.0875476	0.117779	0.0459554	0	0	0	0	0	0	0	0	0
ARL6	0.69951	0.35762	0.472197	1.75833	0.363536	0.476103	0.554982	2.56595	0.412078	0.227514	0	1.30892
ARL6IP1	18.7762	21.5395	45.326	25.7508	17.9405	22.8216	58.1441	22.4338	23.0031	19.5566	43.5905	19.7227
ARL6IP4	61.4411	66.1821	38.5265	63.838	93.3773	110.941	51.7731	61.8192	103.453	100.096	53.1177	73.714
ARL6IP5	44.5979	27.4993	21.1749	10.7316	57.6524	32.3735	51.2316	18.6724	56.4835	37.9411	46.539	29.5736
ARL6IP6	4.38238	2.80345	2.66239	3.76837	7.01843	6.17127	5.12546	4.53498	9.01361	5.93477	4.52956	3.39211
ARL8A	14.9155	22.7167	20.9228	37.9798	32.7873	32.7606	35.3321	39.0535	35.1161	39.5681	32.7374	47.046
ARL8B	7.75525	8.61395	23.643	20.1194	8.19774	9.93274	27.9242	26.0325	7.58561	7.78289	24.3612	22.9905
ARL9	0.0492717	0	0.103455	0.131331	0	0	0	0	0	0.124616	0.207103	0
ARMC1	5.76838	3.29722	4.96126	8.55386	3.88526	2.00666	4.80353	9.05917	2.97739	2.50002	5.0086	7.68408
ARMC10	2.83355	2.03651	3.66197	17.6134	5.40009	4.3659	3.61838	15.0388	5.17923	3.56406	2.61098	13.6572
ARMC12	1.19803	1.32731	0.702854	0.18784	0.854394	0.372984	0.543472	0.137058	0.48424	0.802063	0.444324	0
ARMC2	1.25516	0.714406	0.278749	0.353858	1.41444	0.255504	0.260606	0.187777	1.05044	1.06835	0.304374	0.263416
ARMC3	0	0	0	0	0	0	0	0	0.067198	0	0	0
ARMC4	0.034595	0.108596	0.0121064	0	0.0466026	0	0	0.0448547	0.0528253	0	0	0
ARMC5	2.48332	4.52525	10.6397	13.1928	5.53435	10.3933	12.5929	10.9261	4.66664	7.94068	9.3861	7.92628
ARMC6	5.17164	4.63952	11.3338	46.8993	9.24141	8.03472	9.75535	38.2516	9.4869	5.62706	8.65649	35.9686
ARMC7	3.21065	2.63261	2.72564	9.04822	4.07157	3.07633	4.18366	7.85386	7.18911	3.62618	2.44315	9.16235
ARMC8	7.8818	8.01453	8.6926	8.67814	6.32751	4.85483	7.50878	8.58862	5.9074	5.25307	6.6625	8.37799
ARMC9	0.129999	0.17489	0.0194969	1.13852	0.0750516	0	0.114575	0.86684	0.170146	0.0469698	0.234182	0.270225
ARMCX1	0.270359	0.259799	0.263559	1.5442	0.156085	0	0.238282	0.676037	0.26539	0.0488416	0.0811712	0.280993
ARMCX2	1.59913	0.992904	0.592364	0.545017	0.526263	0.612695	0.714133	0.675081	0.36444	0.256158	0.306953	0
ARMCX3	3.3709	7.54532	10.785	8.14701	3.25735	6.31861	10.9734	10.7335	3.86994	4.76101	10.4747	9.92132
ARMCX3	1.00332	1.25513	0.667881	1.19526	0.719553	0	0	0	0.606186	1.09845	0	2.39919
ARMCX4	0.643501	0.410156	0.269285	0.19951	0.254273	0.458172	0.110699	0.228902	0.259233	0.240877	0.0980935	0.161178
ARMCX4	1.66206	1.7803	1.38043	0.38637	0.437858	0.725355	0.373805	0.215005	0.600992	0.531269	0.245983	0.294202
ARMCX4	1.37809	3.69775	2.84031	2.57955	0.889117	2.07662	1.41404	1.13911	0.632542	1.1218	0.580492	0.803045
ARMCX5	0	0	0	0	0	0	0	0	0	0	0	0
ARMCX5	4.19852	4.28796	3.73752	5.81686	2.96723	3.32795	3.03159	5.35977	2.98213	3.09727	2.30623	3.7107
ARMCX5-GPRASP2	0.680315	0.484285	0.129829	0.310242	0	0	0.132359	0.194405	0.398644	0.286188	0.190417	0.101771
ARMCX6	4.40175	3.89688	2.76121	4.27059	4.57174	4.05603	2.04276	6.46456	4.30965	4.94104	2.16107	7.80961
ARMS2	0	0.411499	0	0	0	0	0	0	0.46706	0	0	0
ARNT	8.8562	8.16228	4.26436	6.40257	8.44319	7.86845	5.19707	7.57191	7.83759	8.07901	4.74988	8.19315
ARNT2	0.0251242	0.00845001	0.0197823	0	0	0	0	0.0244314	0	0.0158858	0.0264011	0.0456967
ARNTL	9.57139	10.5117	5.16577	2.96805	12.636	16.1777	12.9458	6.74248	11.5805	16.9867	9.71449	7.12676
ARNTL2	0.0562809	0.0303694	0.0236992	0.541889	0.0357555	0.241797	0.0528588	1.07658	0.0405298	0.0564284	0.0702649	1.12346
ARPC1A	10.4474	10.6275	16.1963	27.2886	11.2462	8.00905	14.4259	24.9243	10.2413	9.43836	11.6432	23.0451
ARPC1B	84.6126	91.4569	49.1083	187.753	238.427	249.383	128.924	231.253	256.248	210.811	100.158	242.327
ARPC2	87.0083	98.6478	157.554	197.061	126.599	112.555	175.786	234.409	148.717	143.301	158.266	258.223
ARPC2	29.7505	13.9847	51.2151	12.249	29.2814	21.1702	28.4107	15.9962	20.41	19.8556	43.2701	11.0116
ARPC3	50.6502	49.9614	57.5772	64.3354	63.4598	50.3098	42.115	87.5415	60.6205	78.7235	64.0455	97.972
ARPC4	0	0	0	0	0	0	0	0	0	0	0	0
ARPC4	36.2551	41.9083	55.0588	112.313	72.9717	63.9653	65.4885	127.513	75.7784	69.2988	67.1982	138.445
ARPC4,ARPC4-TTLL3	2.51755	3.75547	3.55876	13.2316	6.03524	7.58312	3.45042	8.5694	6.78789	6.77137	2.73221	6.34865
ARPC5	35.403	24.4664	39.2034	58.4965	37.8276	30.7926	39.618	62.272	42.1533	29.9301	41.7563	60.3248
ARPC5L	13.3419	12.9212	26.2417	125.11	29.0704	29.7768	42.024	145.84	27.4294	29.8816	45.4382	152.032
ARPP19	9.36815	12.2489	17.7098	19.5466	9.38418	8.19329	24.3445	27.9347	10.1255	10.4744	24.2836	26.473
ARPP21	0	0	0	0	0	0	0	0.0449427	0	0	0	0
ARPP21	0	0	0	0	0	0	0	0	0	0	0	0
ARPP21	0	0	0	0	0	0	0	0	0	0	0	0
ARPP21	0	0	0	0	0	0	0	0	0	0	0	0
ARPP21	0	0	0	0	0	0	0	0	0	0	0	0
ARPP21	0	0	0	0	0	0	0	0	0	0	0	0
ARPP21	0	0.115433	0	0	0	0	0	0	0	0	0	0
ARR3	0.251741	0.21167	0.0330359	0	0	0	0	0	0.14415	0.0795867	0	0
ARRB1	10.4197	9.12608	1.45588	5.35563	8.17595	7.18801	1.69423	2.79892	8.37299	6.67736	1.56961	2.82115
ARRB2	82.373	68.8889	23.1977	47.7678	108.083	98.0339	38.4381	57.2541	149.688	110.029	38.1613	62.4623
ARRDC1	19.9735	22.2712	11.3823	23.1999	33.9225	46.0657	20.4853	22.2585	37.9003	32.7466	19.7191	30.568
ARRDC2	27.4215	45.4207	31.1633	10.1307	47.1143	74.4388	43.7601	11.0331	45.9401	54.657	29.8538	13.6335
ARRDC2	29.9688	77.5193	33.0574	3.50978	15.4527	32.213	30.9361	3.40053	16.2268	26.0249	15.8833	2.0508
ARRDC3	29.698	15.8615	3.93883	1.26653	15.6823	5.76328	4.00033	1.00114	11.3823	9.18859	3.28717	1.22436
ARRDC3-AS1	0.526825	0.177187	0.190122	0.175528	0.598793	0.261402	0.152355	0	0.527915	0.458021	0.2768	0
ARRDC4	1.67114	1.48519	1.45671	1.07984	0.941402	0.589648	0.437397	0.354558	0.556751	0.128078	0.085143	0.294742
ARRDC5	8.39917	4.16121	1.50483	0.603256	2.33741	1.46404	0.62058	0.0978149	1.15197	1.59003	0.528505	0
ARSA	17.3846	16.0124	5.20145	2.45275	24.6087	24.0742	7.24308	3.16882	26.3406	17.4441	7.46356	5.83886
ARSB	0.489914	0.475953	0.619758	1.50899	1.69864	1.54053	0.834916	1.32048	1.40663	1.77677	1.10548	2.7813
ARSB	0.791573	0.897679	0.284008	1.44946	0.763264	0.777518	0.433832	2.08752	0.895396	1.07605	0.231913	3.25011
ARSD	0.214579	0.128301	0.0500606	0.0423664	1.05987	0.54681	0.171608	0.247302	0.618901	0.442203	0.13362	0.231279
ARSE	0.0185546	0	0.0194793	0.0494561	0.074984	0.0982022	0.057236	0	0	0	0	0
ARSF	0	0	0	0	0	0	0	0	0	0	0	0
ARSF	0	0	0	0	0	0	0	0	0	0	0	0
ARSF	0	0	0	0	0	0	0	0	0	0	0	0
ARSG	0.174398	0.342462	0	0	0	1.88889	0.733943	0.447418	0	0.946045	1.18759	0.649125
ARSG	5.20273	3.47292	1.94627	1.52026	5.76345	2.01316	0.782232	1.4342	5.08124	3.24064	1.26573	0.691833
ARSH	0.0243879	0	0.0256033	0	0	0	0	0	0	0	0	0
ARSI	0.390191	0.559926	0.355019	0.45068	0.47306	1.44559	0.401212	0.303544	0.417065	0.789484	0.765373	0.378502
ARSJ	0.0440264	0.0355377	0.0277324	0	0.0355845	0	0	0	0.0403361	0	0.111033	0
ARSK	1.18217	0.381031	0.297343	0.722103	1.04507	0.782095	0.455834	0.957972	1.86154	0.498315	0.362322	0.806312
ART1	0.094187	0	0.0988812	0	0	0	0	0	0.14382	0.0794048	0	0
ART3	0.107161	0	0	0.141074	0	0	0	0.205001	0	0	0	0
ART3	0	0	0	0	0	0	0	0	0	0	0	0
ART4	0.0300446	0	0	0	0	0	0	0	0	0	0	0
ART5	0	0	0	0	0	0	0	0	0	0	0	0
ART5	0	0	0	0	0	0	0	0	0	0	0	0
ARTN	0.1705	0.293046	0.144191	0.12209	0.184361	0.605768	0.353378	0.177446	0	0.347949	0.191107	0
ARV1	4.47544	1.84078	3.11237	6.07848	3.91681	3.31917	2.02247	6.09837	3.52573	1.51402	0.838732	5.18476
ARVCF	0.76037	0.425637	0.128575	1.14285	0.453694	0.486145	0.12593	0.476375	0.233761	0.2065	0.0872766	0.297006
ARX	0	0	0.0300933	0.038202	0	0	0	0	0.0656549	0.0362488	0	0
AS3MT	0.162832	0	0	0	0	0.351868	0	0	0.688107	0	0	0
ASAH1	10.0406	10.4744	2.73141	5.67867	12.0296	15.7385	5.62549	6.67045	10.7389	10.1935	4.89358	7.54303
ASAH1	0.917705	0.220347	0.306867	0.407898	0.573512	0	0.20323	0	0	0.195682	0	0.361965
ASAH2	0	0.0476483	0	0.189351	0	0	0	0	0	0	0	0
ASAH2B	0.391055	0.350729	0.273696	2.77956	0.526786	0.344951	0.804201	1.52108	0	0.16484	0.273953	1.8967
ASAP1	12.9836	12.0436	10.146	15.5887	11.8116	9.13214	7.16254	15.113	12.8425	12.1627	8.9834	11.0374
ASAP1-IT1	0.0349373	0.0470019	0.110036	0	0	0	0	0	0	0	0.440555	0
ASAP2	0.161352	0.125745	0.0384617	0	0.0888981	0	0	0.0565117	0	0.0296154	0.0492188	0.105924
ASAP3	0.528327	0.350888	0.136892	0.160145	1.16902	0.796333	0.338427	0.233199	1.28732	0.756814	0.294697	0.363164
ASB1	4.75027	4.16851	9.26522	8.4839	3.45938	2.64814	7.06633	7.19857	2.51295	1.44841	4.28221	6.49093
ASB10	0	0	0	0	0.273241	0	0	0	0	0	0	0
ASB10	0	0	0	0	0	0	0	0	0	0	0	0
ASB11	0	0	0	0	0	0	0	0	0	0	0	0
ASB11	0.0299632	0	0	0	0	0	0	0	0	0	0	0
ASB12	0.0955711	0.128574	0	0	0.128743	0	0	0	0	0	0	0
ASB13	2.95677	2.60082	0.301965	3.4184	4.51757	3.35616	1.14543	3.53836	2.01801	2.25357	0.379849	2.41613
ASB14	0.928812	0.848998	0	0	1.02726	0.309487	0.320971	0.476053	1.18482	0.657732	0	0.151233
ASB14	0.659049	0.0980566	0.0680909	0.187591	0	0	0	0	0	0	0	0
ASB15	0.0761107	0.0614359	0.0319616	0	0	0	0	0	0	0	0	0
ASB16	1.92205	1.90289	1.08949	1.3636	1.85943	2.68027	1.72532	1.03332	1.236	1.21863	1.35115	2.29902
ASB17	0	0.105869	0	0	0	0	0	0	0	0	0	0
ASB18	0.0294012	0	0	0	0.118818	0	0	0	0	0	0	0
ASB2	0.0895455	0	0	2.3499	1.14702	0	1.19822	4.46014	0	0	0.718816	10.001
ASB2	0	0	0.0621257	0	0	0.700211	0	3.87618	0.944515	1.03975	0.532797	1.18812
ASB3	0.551863	0.827933	0.165637	0.127871	0.124367	0.284319	0.195104	0	0.454039	0.238227	0	0
ASB3	5.45454	5.14578	5.42499	2.64958	5.13339	4.03022	6.57621	4.0529	4.38304	4.66205	5.60515	2.8674
ASB4	0	0	0	0	0	0	0	0	0	0	0	0
ASB5	0.0135989	0.0365898	0	0	0.0549569	0	0.0419491	0	0	0	0	0
ASB6	7.49749	8.10189	10.388	13.7531	10.8546	11.1126	11.2698	11.8061	12.699	11.7201	11.0627	14.1984
ASB7	5.61382	3.11506	1.66404	4.38004	4.88926	2.50228	3.17427	3.51822	4.06724	2.45551	2.12725	3.50108
ASB8	9.9628	10.9431	4.38564	6.55478	7.26251	5.33968	5.05727	5.76378	7.58234	5.98043	2.65041	5.73439
ASB9	0.361717	0.0649493	0	0	0.292908	0	0	0	0	0	0	0
ASB9	0.0790701	0	0	0	0	0	0	0	0	0	0	0
ASB9P1	0.304181	0.102305	0.186282	0	0.409759	0.134159	0.234579	0	0	0	0	0
ASCC1	0.766011	0.925714	0.490581	0.293442	0.756017	0.299021	0.648028	1.75329	1.42012	0.357464	0	0.527295
ASCC1	3.01704	2.04583	3.08978	4.58026	1.9143	2.04903	1.63532	4.65043	0.950767	1.85266	2.96827	3.6287
ASCC1	1.42613	1.17716	1.89405	1.7696	0	0.371179	1.04995	0.308668	0	0.52839	1.42019	0.808794
ASCC2	20.1645	19.8248	26.239	42.7591	25.5277	25.7456	22.4421	41.1417	24.3207	23.4666	17.1055	40.0555
ASCC3	7.39296	7.40778	7.66314	15.5594	6.54357	6.55162	5.87929	17.6665	5.08482	6.76342	4.90361	14.614
ASCL1	0.0165826	0.0669266	0	0	0	0	0	0.0645012	0	0	0.0697014	0
ASCL2	0.044555	0.0299704	1.05245	4.15656	0.180059	0.353719	1.71801	10.1384	0.510254	0.281717	1.59186	16.0456
ASCL3	0.190113	0	0	0	0	0	0	0	0	0	0	0
ASCL4	0	0.02452	0	0	0.147314	0	0	0	0	0	0	0
ASCL5	0.145039	0.429273	0.152268	0.309275	0.234457	0.307055	0.0894816	0.112832	0.531527	0.293462	0	0.211042
ASF1A	6.53671	5.10403	5.39688	7.74852	6.77008	5.38938	7.90349	10.2214	6.99695	5.77388	7.45571	9.55914
ASF1B	0.475923	0.640268	1.19914	3.04451	0.769333	0.503776	0.734049	1.20328	0.763053	1.38424	0.50011	0.6925
ASGR1	0.118673	0.221031	0.0622074	0	0	0	0	0.923674	0.271437	0	0	0.863695
ASGR2	0	0	0	0	0	0	0	0	0	0	0	0
ASGR2	0	0	0	0	0	0	0	0	0	0	0	0
ASH1L	13.869	14.1019	8.11991	6.05215	8.84418	6.54479	6.8104	6.33891	7.64331	8.46786	6.41657	5.94528
ASH1L-AS1	2.32185	3.93001	3.86317	5.95207	4.06435	12.3249	4.65387	4.09347	3.56182	5.31707	4.12566	3.87841
ASH2L	8.29913	6.91645	9.33306	21.2651	8.02014	7.54095	8.85448	15.9407	11.4784	7.38047	5.71753	15.4195
ASH2L	0.694052	0.192795	0.269733	0.402671	0.935919	0.501999	0.219753	0.492422	0.398928	0.166014	0.727704	0
ASIC1	0.185782	0.202086	0.0540763	1.29233	0	0	0	0.276365	0	0	0	0.306582
ASIC1	0.130434	0.0290581	0.0486034	0.197809	0	0	0	0.364846	0	0.055788	0.0942967	0
ASIC2	0	0.0321994	0.0125636	0.0318979	0	0	0	0	0	0	0	0
ASIC2	0	0	0	0	0	0	0	0	0	0	0	0
ASIC3	3.93432	5.40031	2.0964	1.00666	3.67521	4.65076	1.72718	0.621261	3.60418	3.49648	1.20937	0.68264
ASIC4	0.0144835	0.0194849	0	0	0.175595	0	0	0.0563365	0	0.0366312	0	0
ASIC5	0	0	0	0	0	0	0.0750968	0	0	0	0	0
ASIP	0.493729	0.189778	0.666432	0.376002	0	0.373303	0.217575	0.274351	0	0	0	0
ASL	1.8408	0	0	1.58476	0	0	0.721038	0	1.39086	0	0	0
ASL	1.6597	3.15838	2.88813	2.23246	4.46615	5.06668	3.73411	5.78356	3.66391	4.76222	3.65738	7.55874
ASMT	0	0	0	0	0	0	0	0	0	0	0	0
ASMT	0	0	0	0	0	0	0	0	0	0	0	0
ASMT	0	0	0	0	0	0	0	0	0	0	0	0
ASMT	0	0	0	0	0	0	0	0	0	0	0	0
ASMT	0	0	0	0	0	0	0	0	0	0	0	0
ASMT	0	0	0	0	0	0	0	0	0	0	0	0
ASMTL	0	0	0	0	0	0	0	0	0	0	0	0
ASMTL	0	0	0	0	0	0	0	0	0	0	0	0
ASMTL	0	0	0	0	0	0	0	0	0	0	0	0
ASMTL	0	0	0	0	0	0	0	0	0	0	0	0
ASMTL-AS1	0	0	0	0	0	0	0	0	0	0	0	0
ASMTL-AS1	0	0	0	0	0	0	0	0	0	0	0	0
ASNA1	13.7733	16.5813	26.8586	82.8591	26.7904	40.7064	33.4535	75.1035	38.4755	36.2999	24.077	77.9634
ASNS	1.87294	1.29635	2.81048	3.35908	1.85223	0.465643	1.15251	2.5153	0	0.643786	3.08453	0.861872
ASNS	7.28454	6.05903	21.2713	58.0882	4.69263	3.33014	7.9657	48.7979	5.51339	3.38305	4.79996	32.611
ASNSD1	7.7348	10.6076	26.8635	32.6134	7.74723	6.79348	15.7866	29.1134	7.33081	7.79973	17.3068	24.2557
ASPA	0.0304894	0	0	0	0	0	0	0	0	0	0	0
ASPA	0.0290487	0	0	0	0	0	0	0	0	0	0	0
ASPDH	0.645245	0.863136	0.377427	0	0.534955	0.544382	0.963618	0	0.391245	0.312285	0.496722	0
ASPDH	0.85715	1.42059	1.11619	0.258787	3.26745	1.1294	0.461892	0	1.07593	2.07259	0	0
ASPG	0.125328	0.112404	0	0.0556757	0.084414	0	0.064434	0	0.0956856	0.158487	0	0
ASPH	0.347344	0.332326	0.228118	0.0348329	0.31624	0.281472	0.12054	0.0509944	0.300968	0.134013	0	0.40121
ASPH	2.05208	1.65476	0.365305	1.15284	1.83866	2.61019	0.627617	0.989611	2.9275	2.66479	0.455032	0.99061
ASPHD1	0.195087	0.11248	0.175551	1.18855	0.112628	0.295005	0	0.975635	0	0	0	0.81104
ASPHD2	0.870323	0.886509	0.861487	8.8815	1.10541	1.31608	1.8793	10.8813	1.48083	1.10059	1.72459	12.8447
ASPM	0.0675357	0.0354544	0.0119151	0.0691766	0.0610075	0.105521	0.105237	0.0602695	0.0319448	0.0921011	0.093628	0
ASPN	0.0538106	0	0	0.142964	0	0	0	0	0	0	0	0.118732
ASPRV1	0.800518	0.560779	0.119349	0.101005	0.459423	0.902521	0.116894	0.294795	0.34718	0.718807	0.0796404	0.137847
ASPSCR1	7.9712	7.73083	6.76246	15.9489	8.93567	9.56247	6.19745	13.9493	9.62549	7.87726	5.20851	13.3584
ASRGL1	0.326627	0.183163	0.350694	1.3122	0.212455	0	0	0.752046	0	0.129091	0.14705	0.765296
ASS1	0	0	0	0.675656	0	0	0	0.178398	0	0	0	0
ASTE1	2.70565	5.67474	2.36872	2.39768	2.63133	2.81294	2.42458	2.3736	1.56523	3.27873	2.01406	2.02399
ASTL	0.0953498	2.56552	6.20632	0.423582	0.25689	4.0372	11.373	0.494509	0	6.59158	10.9547	0
ASTN1	0.02098	0	0.0220883	0	0.0449354	0	0	0	0	0	0	0
ASTN2	0.406959	0	0	0	0	0.461026	0	0.198199	0	0.113409	0	0
ASTN2	0.35283	1.1085	0.166146	0	0.625208	0	0	0.0603039	0.0573595	0.171161	0.0614238	0
ASTN2	0.0370311	0.0431126	0.0989551	0.238822	0.0830349	0	0.0829759	0.0962969	0.0712585	0	0	0
ASUN	4.49836	2.12276	4.43193	12.3959	4.36298	2.56395	4.95276	12.6518	4.1847	2.66049	4.36336	9.16358
ASXL1	25.1833	28.3263	50.0896	59.4802	26.721	29.1461	39.3915	56.6242	32.3159	34.7863	37.292	59.8077
ASXL2	11.6672	9.72508	5.02123	8.14185	10.6042	8.96468	5.95114	9.22376	10.8628	8.71305	5.62325	10.0255
ASXL3	0.0592911	0.0942682	0.00565873	0	0	0	0	0	0	0	0	0
ASZ1	0	0	0.0380069	0	0	0	0	0	0	0	0	0
ATAD1	6.89687	5.9543	8.1528	12.7018	5.43177	3.73648	7.03584	13.4133	4.60225	3.26203	4.85061	10.2725
ATAD2	3.0501	4.05356	1.22799	3.78867	2.33361	1.84156	1.50723	3.31154	2.23826	2.62133	0.964645	1.72353
ATAD2B	3.0856	3.19856	2.28378	1.29609	2.3788	2.00469	2.07629	1.9113	1.50063	2.45965	1.67814	1.93642
ATAD3A	2.50082	2.03853	13.1357	49.8306	3.99118	7.05672	12.9265	41.2322	4.2908	4.30409	8.36665	41.3531
ATAD3A	0	0.94954	1.52055	1.43267	0	0	1.10743	0.967061	0	0.340411	3.49632	1.76497
ATAD3B	7.72016	8.06288	25.7189	54.0614	9.57872	13.62	23.9714	42.6729	9.46175	7.92155	19.5697	36.0896
ATAD3C	0.10674	0.0717999	0.0672361	0.028451	0.301957	0.112987	0.0329266	0.0415188	0.14669	0.134982	0	0.0776572
ATAD5	1.40559	0.870024	0.561161	3.25402	0.906727	0.174631	0.264632	2.56682	0.574359	0.35049	0.388327	1.63234
ATAT1	0	0	0	0	1.401	0.617442	1.44712	1.64384	1.98296	1.00698	0	0
ATAT1	2.3819	1.64782	3.03864	1.95965	0	0.432138	0.614443	1.06974	0	0	1.29861	1.26236
ATAT1	2.13457	1.696	2.39435	3.07445	4.30264	0.850922	1.4931	2.86599	0.23158	1.63639	2.60195	4.20023
ATCAY	0.0654347	0.0330114	0.0343479	0	0.0330549	0	0	0	0.112406	0	0.0343801	0
ATE1	7.04855	5.36843	2.52535	10.6363	6.25466	5.23064	2.87519	10.9522	6.48364	5.04306	3.13515	9.90225
ATF1	9.91547	5.92865	17.3494	14.5952	7.17691	3.56821	11.3115	14.0073	8.36121	4.36679	9.3308	11.3651
ATF2	11.1862	6.70874	10.642	9.11794	8.60272	5.10616	12.0654	10.1656	7.62818	5.22863	11.4457	9.6108
ATF3	0	0	0	0	0	0	0	0	0	0	0	0
ATF3	0.0193456	5.83863	18.1281	22.6149	1.34701	24.2285	33.15	22.4906	2.61771	49.8952	37.8653	18.3918
ATF3	0.066794	0	0	0	0	0	0	0	0	0	0	0
ATF4	73.2187	151.329	359.097	330.552	118.243	231.163	322.404	342.946	125.253	189.993	369.888	348.967
ATF5	1.10831	0.964461	5.59262	15.2371	3.65234	1.13819	4.05736	21.8575	1.25828	6.52982	9.71643	28.6338
ATF5	2.23236	9.41666	12.8804	24.4024	5.90028	21.5696	23.5433	32.6508	10.0848	17.9203	13.0491	32.1931
ATF6	7.90961	5.24337	10.7508	7.36218	5.27233	3.49577	6.17975	9.46972	5.15115	3.25818	6.86037	9.17385
ATF6B	41.6395	31.2377	15.0467	29.5106	57.6331	38.151	16.8997	37.2017	59.9276	41.718	16.7071	40.3169
ATF7	5.39332	3.9663	0.0101616	0.836976	3.47747	0.172289	0.0496887	0.161057	1.75333	0	0.203861	1.29135
ATF7	0.593072	1.09449	0.274299	0	2.63743	3.34053	0.785653	1.04459	3.54619	1.65235	0.951432	1.38295
ATF7	2.78738	2.43401	2.94492	6.24952	3.89972	4.15578	2.25821	9.28521	5.64114	5.42694	2.21823	5.97548
ATF7IP	36.9492	23.1006	29.0768	13.7329	32.3929	16.7447	23.9625	12.1687	30.2814	17.9704	18.796	9.90144
ATF7IP2	3.60479	3.15223	0.688997	0.609049	3.23275	2.73025	0.832688	1.12012	4.27866	2.73163	0.815526	0.217927
ATF7IP2	0.454611	0	0	0	0	0	0	0	0	0	0	0.217546
ATG10	1.08513	0.862028	0.150773	0.977656	0.752299	0.570077	0.221418	0.419101	0.575984	0.53963	0.150303	0.521784
ATG12	5.10689	5.46078	5.59148	4.15791	4.79252	2.92027	4.58733	5.31928	4.83424	4.05139	4.72545	4.15285
ATG13	11.4028	14.0556	9.34411	8.32361	13.4638	15.676	14.246	9.86586	13.531	16.8952	12.8717	11.1026
ATG14	7.77273	6.83489	5.44311	3.10188	6.24724	6.61887	5.78659	2.29707	5.84814	6.17211	5.40258	2.2746
ATG16L1	12.9729	14.8838	12.3007	7.52049	15.1821	16.6637	10.9055	7.51753	13.4396	14.7737	10.0816	5.51551
ATG16L2	22.5447	18.0842	4.53609	8.24084	36.0091	35.6742	12.736	7.99237	35.1873	23.7013	14.2062	6.14726
ATG2A	9.96653	12.7125	6.24945	12.5418	20.5828	33.6951	16.05	12.9223	21.8507	32.3833	10.9485	15.3296
ATG2B	8.20557	6.22603	6.71707	6.48922	5.35434	4.10522	7.97941	6.98684	4.50522	3.30399	6.38017	5.88612
ATG3	15.5876	12.9391	26.0439	25.6359	16.4856	11.9361	23.735	31.4766	12.4579	12.1626	21.8862	29.6784
ATG4A	2.7233	1.22123	1.1584	1.94515	2.04003	1.22437	1.64708	3.42523	2.60889	1.46052	1.96878	3.24364
ATG4B	15.6805	15.6823	12.897	19.966	20.9309	19.1808	13.3799	23.0872	19.5426	15.517	12.5942	23.3559
ATG4C	1.83159	1.20091	0.145342	1.51776	1.18136	0.895601	0.284514	2.21474	1.0571	0.895136	0	1.56702
ATG4D	8.2953	14.8337	9.3191	15.4556	14.902	17.3318	11.7002	13.8109	13.1241	18.4706	8.20486	14.0107
ATG5	5.51077	4.7489	4.79897	5.14441	4.51568	4.09943	5.75782	7.26032	5.23498	3.59681	4.69672	6.55895
ATG7	2.01158	1.83915	0.912189	4.21842	1.72527	1.27018	0.826374	2.93317	1.76946	1.42804	0.969983	3.12944
ATG9A	14.019	18.2291	7.28097	17.6227	14.8727	15.8991	10.1921	14.6706	14.0938	14.6855	7.44397	17.1408
ATG9B	4.13102	3.32673	0.437704	2.05762	2.88174	2.97314	0.695316	1.70544	2.59971	2.60289	0.287742	1.84403
ATHL1	215.031	252.319	751.014	29.9007	224.533	286.921	722.88	22.5035	242.794	230.036	718.566	16.4145
ATIC	19.9235	15.2897	23.8631	101.837	20.6084	11.4026	13.2917	87.7217	18.833	12.0476	13.2928	70.462
ATL1	0.629158	0.826338	0	0	0.13803	0	0	0	0.134109	0	0.0615274	0
ATL1	0	0	0	0	0.294537	0	0	0	0.28617	0.230098	0.131291	0
ATL2	5.23254	5.8195	8.22714	10.3429	3.49296	4.04391	8.49718	10.3049	3.35986	4.31016	6.65807	8.51046
ATL3	3.76125	3.58627	8.10826	19.0288	5.01754	3.38223	7.54723	19.8145	5.26933	4.47933	9.59321	19.3941
ATM	47.8208	28.4853	9.44678	1.71199	17.7771	8.88817	8.35043	1.55992	12.3575	7.32193	7.0588	1.34487
ATMIN	8.76137	7.47069	6.53193	8.05506	8.17612	5.51071	7.38986	8.42921	6.78609	5.78059	6.72485	9.54588
ATN1	0	0	0	0	0	0	0	0	0	0	4.45362	0
ATN1	26.3793	40.285	42.8449	96.1677	37.0165	41.3495	29.5997	90.6568	39.4395	46.9322	27.0261	101.337
ATOH1	0.0386771	0	0	0	0	0	0.119309	0	0	0	0	0
ATOH7	0	0	0	0.0722795	0	0	0	0	0	0	0	0
ATOH8	0	0.0189034	0.059006	0	0.0283924	0	0.0216722	0	0	0.0177689	0.0295307	0
ATOX1	9.5186	8.27262	9.90456	47.8237	12.9359	18.7247	8.57486	61.5982	11.5762	21.9436	13.8086	69.251
ATP10A	16.1412	18.5176	4.75899	13.0476	9.63674	11.7876	5.41369	8.69368	7.82311	6.78736	4.06878	5.03855
ATP10B	0.0163327	0.0366212	0.0285779	0.0145113	0.0660049	0	0.0167941	0	0.0498789	0	0.0228837	0
ATP10D	0.352168	0.211508	0.118839	0.134098	0.304973	0.199703	0.252188	0.220151	0.518543	0.222673	0.422933	0.0915051
ATP11A	19.7089	16.7078	4.83948	13.2251	13.9179	13.3063	6.19503	14.478	11.1562	10.276	4.8417	17.7345
ATP11B	19.6727	16.2612	12.0162	8.38443	14.5543	11.4961	14.4943	8.29559	12.5537	10.7025	12.6306	7.77856
ATP11C	4.08949	3.47697	2.64753	2.73112	2.9062	1.37694	2.09141	2.69413	2.46422	1.40178	3.05138	2.93945
ATP12A	0	0.04463	0	0.0589494	0	0	0.0682226	0	0	0	0	0
ATP13A1	31.6289	23.9645	29.0644	68.1941	43.7701	33.2317	30.1218	70.6564	38.7248	25.91	25.3165	83.8388
ATP13A2	12.0111	10.6363	7.21326	30.6057	22.3798	23.6495	14.5948	29.9024	22.1561	19.3496	13.1737	38.4285
ATP13A3	6.15506	4.69607	19.8871	20.0917	4.83855	2.35026	15.3628	28.2485	3.39893	2.53055	15.3575	24.2099
ATP13A4	0.212027	0.116691	0.0505896	0.0256885	0.155793	0.0510082	0	0	0.220744	0.0243751	0.121529	0
ATP13A5	0.0337909	0	0	0	0.0455194	0	0.0347454	0	0	0.0284876	0	0
ATP1A1	93.5366	95.5619	142.583	202.472	96.1796	85.4887	223.369	214.527	89.2658	95.4367	207.756	186.169
ATP1A1	4.65882	1.51865	0.273878	0.422591	4.96492	3.24597	1.47579	0	2.54944	1.21832	0	1.73804
ATP1A1	4.90543	0.527477	0	0	0	1.09851	0	0	0	0.985794	0	0
ATP1A1OS	0.440062	0.133875	0	0.12378	0	0	0	0	0	0	0.195195	0
ATP1A1OS	1.86892	1.41007	1.09602	0.700361	0.754382	2.13764	1.11374	0.207327	0.362547	2.15494	1.10712	0.630094
ATP1A1OS	0.180042	0.243469	0.215776	0	0	0	0	0	0.519974	0.133966	0	0
ATP1A1OS	0.172472	0	0	0	0.83422	0	0.830023	0	0	0	0	0
ATP1A2	0.0226449	0.0304646	0.0396225	0.0201196	0	0	0.0232846	0.0293606	0	0	0	0
ATP1A3	0	0	0	0	0	0	1.16579	0.507983	0	1.22505	0	0.56125
ATP1A3	2.34811	2.63406	1.12972	1.89191	2.4503	2.96788	0.430676	0.489482	4.03726	1.92431	1.10604	0.54081
ATP1A4	0.0112983	0	0.011241	0	0	0	0	0	0	0	0	0.0778994
ATP1A4	0	0	0	0	0	0	0	0	0	0	0	0
ATP1B1	0.153316	0.602824	2.38658	2.76853	0.405625	0.59457	1.09737	1.83623	0.359928	1.2855	2.10167	0.544871
ATP1B2	0.111261	0.149681	0.168719	0.0659019	0.149878	0.0654289	0.381344	0.0480855	0.0566303	0.187597	0.259811	0.0899397
ATP1B3	6.53545	9.09132	44.3876	83.722	9.79202	13.2947	75.2234	99.2626	10.1831	15.3486	55.5948	104.96
ATP1B4	0	0	0	0	0	0	0	0	0	0	0	0
ATP2A1	0.33088	0.402028	0.249619	0.905888	0.38843	0.441366	0.548381	0.371167	0.273551	0.189383	0.251466	0.260645
ATP2A2	11.9981	16.8614	41.8838	107.132	14.9027	21.5586	74.7737	138.711	18.3013	23.0406	72.1604	133.018
ATP2A3	79.022	83.7052	30.621	23.2498	120.993	146.624	60.6185	25.9563	126.018	120.04	41.3891	31.2879
ATP2B1	6.77408	6.90934	7.64839	3.08355	9.56144	8.95237	16.1942	4.3719	8.80415	10.6839	15.9694	3.93334
ATP2B2	0.0131934	0.0240027	0	0	0.0375768	0	0	0	0	0	0	0
ATP2B3	0.0447231	0.0429672	0	0	0	0	0	0	0	0	0	0
ATP2B4	13.1133	8.74141	4.11824	1.29318	34.2012	22.2412	25.5415	6.1412	40.7728	29.3033	30.7405	11.9682
ATP2C1	0	0	0	0.142268	0	0	0.233856	0	0	0	0.190799	0
ATP2C1	2.92811	1.4031	1.65515	3.72297	3.48545	1.19818	2.46045	5.19983	2.24145	0.817362	0.426234	5.52588
ATP2C1	0	2.7772	2.62672	6.77218	0.470141	2.97999	4.6996	6.73889	4.4747	4.00708	0.915893	6.38479
ATP2C1	0.831046	1.03087	1.19585	0	0	0	0	0	0	0	1.31701	0
ATP2C1	0.90827	1.45373	0.840765	0.518233	0.910886	0.852892	0.944288	1.93074	0.785938	0.303748	1.22521	0.690296
ATP2C1	2.49671	0	0.11652	0	1.03411	0	0	0	0	0	1.891	0
ATP2C2	0.0730123	0	0.0127752	0.032435	0.0983542	0.0644044	0	0	0	0.123107	0	0
ATP4A	0.0115738	0	0.0364518	0.0616985	0.0467728	0	0.0357021	0	0	0.029272	0	0
ATP4B	0.0275158	0	0.0288871	0	0	0	0	0	0	0	0	0
ATP5A1	38.0238	33.401	25.358	105.524	33.746	27.1737	30.7756	70.3699	31.5122	24.9645	27.0294	67.9636
ATP5A1	34.0475	28.2981	21.9885	46.5042	30.0501	24.0826	28.7981	67.5951	25.5764	23.2886	23.8116	64.8717
ATP5B	75.4984	94.4734	153.9	386.746	102.516	102.913	198.904	381.818	95.4211	104.914	183.848	350.574
ATP5C1	36.8814	28.1077	43.0749	100.434	33.3397	29.7585	37.3738	93.0961	35.9479	30.9092	35.1858	80.7528
ATP5D	60.8578	106.649	48.5824	270.893	133.099	194.407	87.933	245.807	152.889	167.289	62.4583	251.774
ATP5E	191.391	171.243	185.128	209.503	195.509	327.46	147.369	269.27	133.314	225.014	289.127	262.913
ATP5EP2	0.111932	0.150585	0.117511	0.596699	0.904698	0	0.345282	0.870766	0	0	0	0.814346
ATP5F1	10.4146	10.1817	19.2241	42.7042	14.7354	13.5999	17.914	39.5158	14.9229	17.2896	19.2813	36.5208
ATP5G1	17.6634	16.9322	29.1566	127.425	19.6513	19.3022	18.1203	98.3965	17.7603	26.4062	20.8196	101.584
ATP5G2	97.1367	101.202	84.5738	111.872	110.472	123.031	76.4629	129.042	117.181	136.686	95.3535	136.256
ATP5G2	10.2307	6.59833	1.00796	10.3056	12.5986	4.89293	0	0	1.62458	3.23697	0	0
ATP5G3	3.19263	0	1.71517	6.2899	5.86401	2.73493	6.47947	4.60627	6.3626	0.645705	1.41232	0
ATP5G3	8.02451	14.0248	15.8837	63.2131	8.84408	13.2609	10.2976	56.6523	9.19712	16.3352	13.9328	59.9931
ATP5H	39.4688	27.7961	26.6273	35.8298	43.3502	30.5539	25.5338	45.0767	51.4513	46.8037	30.3396	35.7996
ATP5I	65.7926	78.9474	81.1565	269.217	118.577	224.579	96.429	289.714	136.478	136.431	87.7539	247.953
ATP5J	26.402	22.8523	24.8965	67.8909	25.0057	24.0642	18.1406	80.4289	24.9478	26.5184	16.4685	66.6538
ATP5J2,ATP5J2-PTCD1	38.4469	31.7874	52.6614	146.541	48.9977	59.949	47.9121	170.046	70.4802	57.9921	53.2283	170.488
ATP5L	48.507	54.1308	51.074	51.5929	60.5886	64.5387	43.6543	60.7908	51.0975	73.2761	56.0379	68.9837
ATP5L2	0.61864	0.0693557	0.108245	0.137412	0	0.545705	0	0	0	0	0	0
ATP5O	65.7729	55.759	47.1607	59.2553	53.4917	36.5152	42.0919	57.4489	52.6746	46.0146	40.8142	47.2199
ATP5S	2.78058	3.44725	2.6027	2.79885	1.80016	1.84322	3.13754	3.3513	2.29659	1.71178	1.87471	2.36847
ATP5SL	1.56492	2.2272	3.71947	7.36356	0	0	0	0	0	2.14931	2.46087	0
ATP5SL	8.73064	8.18158	9.19646	27.2021	13.6052	15.4812	12.4099	33.1791	15.5339	11.8938	9.02301	36.7784
ATP6AP1	20.1933	21.2526	12.2789	31.6981	34.1811	36.0406	16.2235	34.5021	37.9362	30.7723	12.7029	45.8299
ATP6AP1L	1.35855	0.365536	0.171151	0.434535	0.21961	0.287611	0.335261	0.422746	1.24467	0.549758	0	0
ATP6AP2	25.2286	23.4889	14.1669	17.6876	24.1194	24.7348	19.7835	22.5852	21.6866	22.9235	20.4092	22.2257
ATP6V0A1	2.36206	1.66237	1.96595	4.35643	1.61011	1.07948	0.552803	2.79029	1.96217	1.56188	1.17205	4.13066
ATP6V0A2	4.89306	3.60906	4.5948	16.2146	4.40274	4.09954	3.88515	12.3209	3.98097	3.058	4.31456	10.4001
ATP6V0A4	0.0332434	0.0357208	0.0208761	0	0	0	0	0	0	0	0	0
ATP6V0A4	0.0338792	0.0364039	0.0212754	0	0	0	0	0	0	0	0	0
ATP6V0B	11.2443	14.6938	19.3365	107.536	25.8975	51.1946	39.0381	145.013	30.8312	41.0799	39.979	142.215
ATP6V0C	0	0	1.14958	0	4.00006	3.47884	0	0	0	0	0	0
ATP6V0C	95.2796	268.669	325.534	321.655	167.412	322.618	295.342	328.588	220.673	352.752	215.578	348.375
ATP6V0CP3	0.731991	0.895237	0.209583	0.177371	0.537849	1.76098	0.205273	0.517676	0.304834	0.504907	0.279706	0
ATP6V0D1	10.4828	14.2686	22.9426	14.8582	18.341	18.9289	35.7605	22.2582	20.4511	21.2101	26.1262	30.3268
ATP6V0D2	0	0.0701458	0	0	0	0	0	0	0.0796169	0	0	0
ATP6V0E1	45.6745	29.027	45.4994	102.697	57.5642	42.5142	43.5071	110.265	62.4695	43.1126	37.69	104.65
ATP6V0E2	26.5292	24.9468	2.55164	13.0267	31.1136	32.7767	4.63898	11.1021	25.9584	26.2432	3.83898	12.4579
ATP6V0E2-AS1	2.15631	1.04757	0.31104	0.222247	1.1548	0.355492	0.384495	0.10486	0.43247	0.340446	0.311429	0.295246
ATP6V1A	1.84746	1.33923	3.26708	5.13943	1.70342	0.711982	3.07078	4.63953	1.27356	1.04338	2.60103	3.78432
ATP6V1B1	0.0637305	0.0571585	0.0892089	0.0566233	0	0	0	0	0.0973141	0	0	0
ATP6V1B2	6.73889	11.8331	22.8011	35.6357	5.46861	8.16459	22.2487	31.6863	6.63274	7.016	18.9405	30.2239
ATP6V1C1	3.78404	2.94369	3.6997	4.42712	2.04287	1.75814	3.07413	4.88752	2.11716	1.86295	2.48901	4.04546
ATP6V1C2	0.198572	0.0817212	0.0994552	0.235074	0	0	0.44132	0.446776	0.24951	0.0442466	0.538172	0.450926
ATP6V1D	3.71769	4.84806	8.71585	7.11281	5.25386	3.62141	10.061	7.45213	4.70163	5.82618	7.28599	7.96489
ATP6V1E1	14.5274	15.3885	21.2998	30.1001	17.3626	12.0057	21.04	41.311	17.1078	13.8701	20.0919	32.3673
ATP6V1E2	1.64431	1.28807	0.393326	0.388352	1.42996	1.10161	0.192618	0.242882	1.52555	1.26341	0.0874877	0.15143
ATP6V1F	42.4286	46.1917	53.8041	95.4237	57.4557	79.7077	46.2833	98.2721	68.2167	74.6163	44.6419	98.7383
ATP6V1G1	41.6002	41.828	41.3113	21.8086	40.9186	38.9737	35.9659	21.4821	38.7691	42.0984	35.6809	24.1827
ATP6V1G2,ATP6V1G2-DDX39B	3.85327	2.18162	1.56439	0.399413	2.25871	1.52119	2.04303	2.53952	0.821954	1.68016	0.313235	0.202076
ATP6V1G3	0	0	0	0	0	0	0	0	0	0	0	0
ATP6V1H	0	0	0	0	0	0	0	0.902943	0	0.19033	0	0
ATP6V1H	6.36861	5.24716	4.9056	7.28219	6.47215	4.69738	6.79903	7.81445	3.58709	3.72636	4.43008	6.85326
ATP7A	1.65968	1.94554	2.28753	1.08654	0.921752	0.616425	1.90117	1.20807	0.822527	0.957348	1.73383	0.988574
ATP7B	0.240924	0.21469	0.0286902	0.227356	0.210338	0	0.039877	0.159354	0.14867	0.181268	0.143638	0.141549
ATP8A1	10.4837	5.81274	2.28229	0.995607	3.05598	1.59057	1.0488	0.369546	2.19161	1.41874	0.567703	0.399471
ATP8A2	0.370276	0.143907	0.103661	0.263186	0.166265	0	0.0253823	0.160029	0	0.0208108	0	0
ATP8B1	0.335512	0.121562	0.284651	0.242736	0.338164	0.110161	0.0856081	0.328855	0.159744	0.105285	0.204138	0.152346
ATP8B2	2.10424	2.28979	1.32474	3.20363	5.60541	8.33332	1.33199	3.35361	8.9884	4.51844	0.660391	1.90777
ATP8B2	40.0348	33.4909	10.5309	20.6496	65.442	52.4759	14.7303	26.7291	66.7665	50.5289	11.9174	29.331
ATP8B3	0	0	0	0	0	0	0.0505769	0.159632	0	0	0	0
ATP8B3	0.471604	0.412386	0.158553	0.0835455	0.742875	0.914754	0.0483082	0	0.733141	0.755487	0.428994	0
ATP8B4	0.036279	0.0488068	0.038087	0.0193399	0	0.0384021	0	0.0846684	0.033238	0	0	0.0527883
ATP8B5P	0.0327564	0.0220339	0	0.0436551	0	0	0	0	0	0	0	0
ATP8B5P	0.014453	0.0388879	0.0151733	0	0	0	0	0	0	0	0	0
ATP9A	0.0326051	0.0292428	0.01141	0.028969	0.087844	0	0.134104	0.359334	0.0746802	0.0137439	0.0456829	0.276749
ATP9B	7.79956	6.99526	6.28264	5.44301	7.22097	6.75493	6.03677	5.95726	6.58278	7.24495	7.431	4.88346
ATPAF1	1.20471	0	0.155556	0	0.658744	0	0	0	0.324553	0	0	0
ATPAF1	9.69936	7.2398	2.76392	17.8454	11.4743	9.45225	3.12653	14.6277	12.736	9.59124	2.17658	12.4004
ATPAF1-AS1	0.287714	0.387068	0.201369	0.127814	0	0.761382	0	0.18652	0.658994	0.242559	0.201558	0
ATPAF2	5.44084	5.89143	4.37456	7.85243	4.50484	7.02349	4.50291	8.87822	5.83584	6.51119	4.12765	8.10987
ATPBD4	2.508	2.14977	1.08372	3.1001	1.95206	0.657566	0.595528	2.29543	1.10405	0.99414	0.436459	1.39051
ATPBD4-AS1	0	0	0	0	0	0	0.0860283	0	0	0	0	0
ATPIF1	67.9794	91.1476	57.8897	161.708	122.592	173.993	59.7587	176.169	135.93	148.209	36.3805	185.696
ATR	5.72612	4.51999	3.33332	4.47101	3.77274	2.5101	2.77197	3.94193	2.30977	2.04545	2.30823	3.45043
ATRIP	3.68623	2.69394	1.81646	6.75589	3.93535	3.56208	2.07588	6.89616	4.618	3.04593	2.06871	7.40478
ATRN	5.19631	5.08508	1.45524	6.40219	5.71953	5.70815	1.845	7.69887	3.83717	4.0215	1.88555	6.31409
ATRNL1	0.0518899	0.126924	0.0297142	0.0125736	0.0381274	0	0.0436545	0	0	0.0119307	0.019828	0
ATRX	16.1602	12.7592	5.62507	7.75663	11.6336	9.29051	4.76378	7.41614	10.5991	9.28869	5.10792	6.81846
ATXN1	3.63379	4.2303	5.4376	5.61016	8.67886	8.99825	9.07857	9.18566	11.8161	11.5503	8.62033	10.3592
ATXN10	9.8115	9.82679	5.32941	21.1881	9.40917	7.2354	4.50918	17.0691	8.24152	6.48089	4.39404	15.6442
ATXN1L	9.17334	15.1484	10.9263	6.48216	12.8693	16.7465	13.1807	7.40482	13.5389	18.4655	12.8601	8.82752
ATXN2	12.2119	8.96873	8.1393	13.2629	14.586	10.7104	7.48547	12.5737	15.5304	10.5907	7.29081	14.9776
ATXN2L	73.8125	79.4594	230.482	200.481	112.522	105.495	141.635	171.127	111.13	102.983	129.272	180.883
ATXN3	2.97024	1.88913	1.74729	2.01215	1.97321	1.34002	2.71279	2.07635	1.69427	1.5002	2.40493	2.47638
ATXN3L	0	0	0	0	0	0	0	0	0	0	0	0
ATXN7	0.411465	0.381415	0.625339	1.30987	0.421825	0.711898	3.0217	2.02022	0.260355	0.966254	2.28192	4.45554
ATXN7	5.33707	8.82776	11.3593	6.2967	5.9064	9.93275	11.9246	4.62144	6.63158	9.46471	12.4363	0
ATXN7	21.1288	26.5717	13.1213	0	15.6635	8.55556	5.26551	1.35947	11.499	11.9998	1.80632	3.75927
ATXN7L1	3.68597	2.40749	0.199013	0.575031	6.12576	3.15774	0.838523	1.63246	8.07046	5.12448	0.845194	2.6765
ATXN7L1	7.1754	7.25351	1.58899	0.320202	6.6034	5.52173	2.00944	0.485476	4.47793	5.77792	1.54259	0.345757
ATXN7L2	4.44421	4.79241	4.91987	14.934	5.59074	6.04055	6.34786	12.2419	4.43609	5.33579	5.45146	11.5745
ATXN7L3	18.5726	19.4382	17.4928	32.7126	26.1467	28.7979	22.6379	31.3678	29.5333	24.8381	21.2851	29.2737
ATXN7L3B	28.9971	29.5287	23.8653	20.6644	25.6795	23.5653	22.017	18.4937	23.9837	21.3338	19.1383	16.8478
ATXN8OS	0	0.0376462	0	0	0	0	0	0	0	0.0707738	0	0
AUH	4.38369	3.38493	1.25266	6.70647	4.29788	4.53041	1.84035	9.6859	4.75295	3.80503	1.85349	5.85016
AUP1	37.6711	42.2126	53.4303	109.922	54.9189	52.1906	53.0182	117.588	55.9207	56.6687	53.3835	124.315
AURKA	0.155167	0.14196	0.174283	2.30961	0.234266	0.279151	0.179188	2.26638	0	0.565017	0.244361	1.43632
AURKAIP1	0.70388	0	1.2273	59.7539	5.1142	6.51762	8.16802	40.226	4.755	3.76571	0	33.5192
AURKAIP1	3.54522	5.11794	5.57238	31.9268	5.98039	9.9231	5.50946	31.9989	8.7116	8.08785	11.0186	39.4364
AURKAIP1	14.922	23.5499	40.3497	50.6998	31.9864	49.6612	39.399	48.9712	41.1191	35.901	39.4433	48.0468
AURKAPS1	0.85759	0.793191	1.12541	0.214299	0.433219	0.283681	0.99204	0.729698	0.491066	0.677808	1.23912	0.389953
AURKB	0.0671199	0.180744	0.0704407	0	0.513309	0.336139	0	0	0.436412	0.510062	0	0.488151
AURKC	0.0741185	0	0.10375	0.197558	0	0	0	0	0.339528	0	0	0
AURKC	0.0329529	0.221499	0.046127	0.087834	0.399311	0	0	0	0.150954	0	0.276896	0
AUTS2	1.81945	2.19668	0.706161	0.166435	29.2692	29.9461	23.0738	3.4379	41.4841	40.5133	19.9625	6.72088
AUTS2	0.807371	0.135537	1.61107	0.237746	6.2591	1.99157	4.73388	0.440179	6.79157	8.6142	9.78316	1.16163
AVEN	3.09404	3.1852	1.46877	15.2031	5.00154	4.41429	2.65581	12.9767	3.82068	4.35497	2.14868	11.5487
AVIL	0.779443	0.596595	0.465513	0.403973	0.731863	0.364076	0.763911	0.643918	0.882328	0.556735	0.636112	0.400373
AVL9	8.03516	8.28991	8.47237	12.3184	5.87189	6.20765	8.47812	12.2566	6.89652	4.9588	7.7261	10.3162
AVP	0	0.0895237	0.139722	0	0	0	0	0	0	0	0	0
AVPI1	2.92954	6.32975	0.528124	0.709866	5.02263	10.3366	1.0041	0.460405	5.9644	9.57968	1.24381	0.215287
AVPR1A	0.00526001	0.00707639	0	0	0.0425142	0	0	0	0	0.0133034	0	0
AVPR1B	0.0232324	0.031255	0	0	0	0	0	0	0	0	0	0
AVPR2	0.831237	0.792235	0.308292	0	0.69084	1.05123	0.336976	0	0.230103	0.5232	0.108144	0
AVPR2	0.623056	0.485963	0.355332	0.336989	0.498683	1.4201	0.605934	0.196435	1.85723	0.679386	0.212092	0
AWAT1	0	0	0.0309107	0	0	0	0	0	0	0	0	0
AWAT2	0.0193932	0	0.0203597	0	0	0	0	0	0	0.0490485	0	0
AXDND1	0.0791702	0.0456468	0	0	0	0.0598597	0	0	0	0	0	0
AXIN1	16.3045	16.9518	22.7108	20.6272	27.1096	30.9544	22.8804	15.0242	35.1608	25.8723	20.1958	14.4792
AXIN2	12.6824	10.5147	5.78358	2.46462	14.5538	12.0029	7.35601	2.30942	13.3761	11.89	7.40501	2.05357
AXL	0.0959501	0.164288	0.238468	0.0691342	0.133803	0.276575	0.619902	0	0.0793395	0.242012	0.292737	0
AZGP1	0.0651243	0.0438065	0	0	0	0	0	0	0	0	0	0
AZGP1P1	0	0	0	0	0	0	0	0	0	0	0	0
AZI1	4.41519	4.31514	1.14384	8.28111	5.65691	7.46893	2.30281	8.45399	5.34959	5.46771	1.54989	8.69353
AZI2	5.83006	6.25576	4.05295	4.75022	6.41918	5.44186	5.68345	6.21135	4.05225	4.29937	4.44959	4.93676
AZIN1	13.5714	18.0269	27.1376	27.1709	13.0587	12.4538	23.7076	27.9603	14.0163	16.3097	22.1118	21.6643
AZU1	0	0.243049	0.0474167	0	0	0.95618	0.417973	0	0.206899	0.342694	0	0.328596
B2M	2175.33	1723.65	1399.63	1466.13	2178.2	1543.95	1867.72	2054.63	2047.32	1989.22	2289.92	1972.96
B3GALNT1	0	0	0	0	0	0	0	0	0	0	0	0
B3GALNT1	0.10199	0.0833608	0	0.367112	0	0	0	0.241158	0	0	0	0
B3GALNT2	1.57723	0.889135	0.879008	1.90991	1.87259	0.899771	2.45254	2.71969	1.54582	1.2436	2.04301	2.96113
B3GALT1	0.0189996	0.102242	0.0199465	0	0.230347	0	0	0	0	0	0	0
B3GALT2	0.150926	0.140568	0.170636	0.0618898	0.844521	0.122891	1.25345	0.677371	0.638192	0.704706	1.41517	1.1825
B3GALT4	2.56528	3.12245	1.69283	0.520961	4.54173	4.91361	5.12476	0.665211	7.27461	3.70744	3.08075	0.533237
B3GALT5	0	0	0	0	0	0	0	0	0	0	0	0
B3GALT6	3.43751	3.53292	32.5414	37.5937	5.00824	7.96451	48.3771	38.0467	6.96106	5.03731	40.37	38.6406
B3GALTL	1.51546	1.23642	2.28897	1.01636	2.17316	1.5524	2.83503	1.63529	1.97067	1.16222	1.80823	1.7783
B3GAT1	0.0700442	0.0942148	0.02439	0	0.141315	0.35764	0.142704	0.179942	0.106698	0.0884045	0.342483	0.1687
B3GAT2	0.0226684	0	0	0.0587232	0	0	0	0	0	0	0	0
B3GAT3	14.9603	18.438	16.0749	23.6178	23.3314	31.2201	19.8223	19.1367	27.8266	24.1243	13.505	19.7229
B3GNT1	1.57203	1.15114	0.271581	3.87191	3.37754	1.26382	0.245534	4.10227	2.55236	1.35886	0.334567	4.05363
B3GNT2	6.62295	11.4499	14.4724	10.5439	7.9932	12.2129	11.5092	8.80078	7.68771	10.4217	9.25839	7.41294
B3GNT3	0.227157	0.224106	0.0158985	0.121095	0.489601	0.240451	0.0467146	0.294524	0.138744	0.421312	0	0.330528
B3GNT4	0.191714	0.221071	0.172516	0.0730004	0.221362	0.579811	0.337936	0.10653	0.25092	0.277072	0.690711	0.39851
B3GNT5	0.0799246	0.0403215	3.13606	3.32866	0.161498	0.105753	2.49628	1.82643	0.32036	0.176874	2.89754	0.508793
B3GNT6	0.0495284	0.0666315	0.0173323	0	0	0	0.152782	0	0	0	0.0693941	0
B3GNT7	0	0.0305739	0.0477176	0	0.0918424	0	0	0	0	0	0	0
B3GNT8	0.747331	0.473129	0.253834	0.410111	3.37548	3.95534	0.745839	0.598477	3.92689	3.3911	0.554338	0
B3GNT9	1.194	0.929935	0.358389	0.442709	7.13996	6.64022	2.27999	1.72385	7.76437	4.51445	2.81024	2.123
B3GNTL1	3.15709	2.36406	1.34454	6.43037	4.0924	3.1527	1.92939	6.14006	4.63885	4.29371	1.87785	6.50063
B4GALNT1	0.0273695	0	0	0.364759	0	0	0.0422139	0.894225	0	0	0	1.04215
B4GALNT2	0	0	0	0	0	0	0	0	0	0	0	0
B4GALNT2	0	0	0	0	0	0	0	0	0	0	0	0
B4GALNT2	0	0	0	0	0	0	0	0	0	0	0	0
B4GALNT3	0.119811	0.161184	0.100626	1.37321	0.435771	0.443881	0.369586	3.07579	0.76838	0.575742	0.352521	2.44067
B4GALNT4	0.274289	0.401094	0.313	3.6873	0.867504	0.315589	0.367874	1.53077	0.05463	0.120647	0.200508	0.173526
B4GALT1	22.9548	21.6699	29.2997	17.754	57.4835	53.2172	34.5575	28.5414	45.3868	61.3562	32.2031	31.4024
B4GALT2	0.0685273	0.067048	1.0971	7.94837	1.66105	1.19255	2.51201	19.9232	2.65216	0.945884	4.94704	26.483
B4GALT2	0.0753287	0.0737027	0	1.29675	0	0.537365	0.850596	2.70248	0	0	0	2.12559
B4GALT2	0.0753663	0.0737394	0	2.61671	0	0	0	2.72767	0	0.882743	0	0
B4GALT3	13.9693	17.6063	20.6014	50.5242	17.894	20.8531	21.5549	49.6078	17.2231	19.9299	21.4213	52.9679
B4GALT4	5.69315	4.24434	10.6464	5.0982	2.13409	1.39395	8.48435	6.17224	1.91845	3.54846	9.22505	5.30032
B4GALT5	1.4291	1.37161	16.9975	25.5261	5.88101	4.75035	23.9236	37.8944	10.8577	10.7331	33.4775	41.0815
B4GALT6	0.00855653	0.0345338	0.00898297	0.114035	0	0	0.0263946	0.199694	0.0391965	0.0216408	0	0.186755
B4GALT7	6.79761	6.73838	9.38999	21.2338	9.83171	10.4776	10.0062	18.7404	9.50562	8.50564	8.72208	21.1702
B9D1	0	0.104623	0.152821	1.77334	0	0	0.273844	0.918432	0	0.20184	0	1.77611
B9D1	0.174255	0.14215	0	0	0.235032	0	0	0	0.470096	0	0.244332	0
B9D2	4.52895	12.1669	3.0292	4.41929	5.91833	20.4552	5.25688	2.05993	6.41879	16.3025	4.4432	3.99853
BAALC	0	0	0	0	0	0	0	0	0	0	0	0
BAAT	0	0.0656384	0.0256109	0	0.0492936	0	0	0	0	0	0	0
BAAT	0.0710429	0.0637323	0.0248672	0	0.0478621	0	0	0	0	0	0	0
BABAM1	26.3107	29.2677	20.6152	62.7474	39.783	38.2721	20.7491	64.7243	39.3389	40.3321	24.0812	62.8172
BACE1	0.44298	0	0	0	0	0	0	0	0	0	0	0
BACE1	0.652803	0.658916	0.29136	0.41582	1.39821	0.711193	0.202761	0.740349	1.755	1.18748	0.214869	0.363436
BACE1-AS	0.569224	0.222861	0	0.364062	1.17676	0.59445	0	0	0.602837	0.537653	0	0.752963
BACE2	0	0.0579204	0	0	0	0	0	0	0.265962	0.440726	0	0.316404
BACH1	4.33182	6.72792	11.2349	1.78309	3.11388	3.34638	8.90985	3.30444	2.62754	4.31894	12.0485	2.2956
BACH1	0.201029	0	6.67786	0.826253	0	0	12.2149	0.505469	0.243642	0.324031	7.65705	0
BACH1	0.444722	0.628357	2.38979	0.55924	0.817299	0.350102	2.77292	0.318825	0	0.501275	1.78725	1.28694
BACH2	13.3963	14.8489	49.5077	9.76462	3.93631	3.87294	22.6336	3.98446	4.62629	5.85266	27.0176	3.35558
BACH2	1.91314	2.07924	0.523389	16.1566	1.92062	3.07053	5.29451	8.72141	0.788614	0	0	6.24485
BAD	6.85218	9.07674	3.63512	10.0335	15.4554	17.3059	10.5694	12.691	17.9727	19.9024	5.32504	12.9758
BAG1	6.20208	7.09864	10.543	25.4066	8.85632	11.5986	12.7326	21.7242	11.111	9.44392	12.252	24.7668
BAG2	1.92707	2.4845	1.72808	7.22319	0.973476	1.80612	1.30036	5.85603	1.10346	1.32001	1.26563	4.96544
BAG3	18.9681	29.142	29.8449	17.8215	29.094	47.6073	31.0611	17.5251	32.3913	50.0011	24.3297	21.9306
BAG4	2.20209	2.75671	2.28083	5.13301	2.16258	1.77497	1.92918	4.00171	1.66898	2.75491	1.58452	3.89341
BAG5	1.77164	4.37775	5.32846	3.73803	2.61556	4.17035	4.3421	3.63179	4.36065	3.45056	3.98833	1.04778
BAG5	6.90148	4.86179	6.67754	4.59365	5.05685	2.29159	6.01631	5.01193	3.86537	4.44312	8.82056	5.1905
BAG6	19.9818	29.1782	17.0311	47.5709	37.9207	38.5648	33.2777	76.1784	33.9155	32.4538	20.1426	75.6219
BAG6	26.3358	25.6271	59.7401	103.983	29.9232	38.6369	42.0103	72.3785	38.3087	35.3738	51.1774	69.1079
BAGE	0.0433135	0	0.0909443	0	0.175041	0	0	0	0	0	0	0
BAGE2,BAGE3,BAGE4,BAGE5	0.0931247	0	0	0	0	0	0	0	0	0	0	0
BAHCC1	0.0161899	0.0108903	0.00849838	0	0.0327138	0	0	0	0.0370821	0	0.0170127	0
BAHD1	10.0384	13.1743	24.1253	23.4819	14.1234	17.1479	24.6491	20.6029	16.5512	16.711	23.2585	19.599
BAI1	0.797296	0.92225	0.398959	0.158889	0.782937	1.41974	0.413739	0.173901	1.02402	1.05536	0.375843	0.162633
BAI2	0.0912823	0.0921028	0.0638878	0	0.952982	0.724684	0.0938606	0.0591767	1.46354	1.17358	0.255791	0.332054
BAI3	0.0730728	0.00983062	0	0	0	0	0.022541	0	0.0334738	0	0	0
BAIAP2	1.16331	1.39872	4.98456	2.48544	1.3536	1.05281	7.37821	2.39083	0.813722	1.19595	6.8012	2.68935
BAIAP2L1	0.662145	0.583969	0.777641	0.926887	0.685726	0.61201	0.587347	0.566055	0.205659	0.693094	0.542776	1.06096
BAIAP2L2	1.44025	1.60174	0.423368	0.614224	2.09536	1.21963	0.355423	0.44817	1.58343	1.65132	0.484303	0.279421
BAIAP3	1.30794	0.976307	0.74004	0.119284	15.6856	18.0606	6.7352	0.402706	18.0616	15.5693	6.05117	0
BAIAP3	0.120946	0.226277	0	0	0	0	0	0	0	0.1497	1.14425	0
BAIAP3	0	0	0	0.0592922	0	0	0.362632	0	0	0	0	0.399306
BAK1	1.8783	3.33552	1.69584	8.26072	5.08578	8.05232	3.30262	9.57088	6.023	5.93816	3.63172	11.6155
BAMBI	0.286713	1.41431	0.200668	0.12737	0.193114	3.28784	0.294812	0.0929355	0.547251	3.38401	0.803426	0.695311
BANCR	0.122048	0.0820966	0	0	0	0	0.188243	0	0	0.154339	0	0
BANF1	6.72153	5.99417	10.6208	30.863	3.80476	4.79359	6.59005	30.0015	7.57832	5.65076	9.12312	31.7819
BANF2	0	0	0	0	0	0	0	0	0	0	0	0
BANF2	0	0	0	0	0	0	0	0	0	0	0	0
BANK1	0.0239114	0	0	0	0	0	0.0829665	0	0.109434	0	0	0
BANK1	0.0256299	0	0	0	0	0	0	0	0	0	0	0
BANP	5.60209	3.64776	15.2077	5.52032	6.44601	6.49597	6.50219	5.87425	7.3601	6.21253	10.8393	7.4301
BANP	0	1.86019	3.24154	0	0	0	2.95169	0.902788	0	1.30861	0	0
BANP	0	0	0.393891	1.43698	0	1.44673	3.08703	0	0	0	0	0
BAP1	21.6989	25.6048	29.4286	55.2026	27.5892	32.4824	35.9849	48.862	25.5871	27.6435	31.8837	49.3333
BARD1	0.905125	0.44862	0.316745	1.31209	0.641729	0.504261	0.587805	0.864723	0.509192	0.562262	0.734202	0.808695
BARHL1	0.0863998	0.203412	0.0453529	0.17272	0.174582	0.11432	0.333151	0	0.197894	0.10926	0.0907909	0.157147
BARHL2	0.0550683	0.0740845	0	0.0733907	0	0	0	0	0	0	0	0
BARX1	0	0.0373922	0.175077	0.074084	0	0.147105	0.0857381	0	0	0	0.116827	0
BARX2	0.0233113	0	0.0734194	0	0.0942074	0	0	0	0	0	0	0
BASP1	0.0687665	0.0616752	0.312839	0.672075	0.370538	0.121318	0.989924	0.713282	0.840031	0.289869	0.963485	0
BASP1P1	0.0357562	0.0962069	0.0375382	0	0.289001	0	0	0	0	0	0	0
BATF	12.1821	12.0263	99.1852	262.684	26.2093	35.9483	221.28	336.123	40.348	49.0971	357.144	438.679
BATF2	0.0384964	0.0517899	0	0.0513049	0	0	0	0	0	0	0	0
BATF3	0.0839778	0.169465	7.00897	77.5599	0.509065	1.11116	23.0554	126.903	0.961733	0.955771	50.4766	168.932
BAX	32.68	38.4395	19.3776	107.021	57.8921	78.101	22.5451	105.914	88.6557	72.8279	22.1948	105.557
BAZ1A	21.6068	17.9504	42.6728	40.1102	19.7345	17.4947	37.9343	38.9755	18.6139	17.8881	32.1529	32.7188
BAZ1B	18.5579	9.39747	17.8846	35.227	18.0756	10.8381	17.1219	31.625	15.9223	9.64274	16.337	30.0904
BAZ2A	34.4755	32.8346	52.24	19.8348	31.6931	28.8433	40.306	21.0364	30.6877	27.3792	39.2633	25.7277
BAZ2B	2.19484	1.93222	1.61933	0.485271	2.28901	2.11451	1.87203	0.786843	1.7375	2.35346	1.16913	0.772653
BBC3	3.62026	6.26303	7.55172	4.16791	5.50909	18.571	7.85928	2.43404	5.30881	19.4448	6.76347	2.27608
BBC3	0	0.884206	0	1.49937	0	0	0	0	0.857767	0	0	0
BBIP1	0	0.59543	0.938372	0	0	0	0	0	1.45892	0	1.09565	0
BBIP1	5.27677	3.14887	1.88532	2.76601	3.04182	3.05295	1.37313	3.07721	1.06332	2.62506	1.97604	3.77542
BBOX1	0.0218405	0.0293824	0.0458579	0	0	0	0	0	0	0	0	0.158897
BBS1	6.24589	4.14381	2.81022	3.61631	7.65638	5.1106	2.52619	3.04277	5.82314	5.00801	3.08258	4.00165
BBS10	1.32207	0.618646	0.77243	1.13378	0.603974	0.608454	0.709259	1.11792	1.05326	0.436139	0.531544	1.33823
BBS12	0.342604	0.358568	0.253228	0.338105	0.101456	0.470214	0.430421	0.344549	0.230886	0.0634947	0.533357	0.461585
BBS2	16.3067	12.5639	6.05478	2.18493	12.3044	9.4517	6.59251	1.65117	9.65588	6.66391	4.06081	1.49094
BBS4	4.11343	3.12918	1.07809	2.73283	2.19352	1.68884	0.798714	3.26187	1.40025	1.33383	0.352428	3.42236
BBS5	0.443617	0.386169	0.205467	1.21721	0.421829	0.48339	0.402483	0.659763	0.119539	0.395993	0	0.759402
BBS7	1.47749	0.70293	1.59883	2.75849	1.2708	0.582111	1.14913	3.21885	1.56025	0.561854	1.1188	2.08945
BBS9	2.87051	2.94987	1.13511	0.534454	2.48419	2.05548	1.17258	0.615563	1.76742	1.96822	0.814409	0.690331
BBX	11.3037	11.5893	6.13154	6.67819	8.30001	6.36594	4.83383	6.7515	7.57475	8.90681	5.05745	6.5942
BCAM	0.0501685	0	0	0	0.0970355	0	0.0370341	0	0	0	0	0
BCAN	0.028787	0	0	0	0	0	0	0	0	0	0	0
BCAP29	0.825245	1.36175	0.876328	1.93324	1.83509	0.488851	1.09661	1.29233	2.66381	1.73036	1.40863	2.95005
BCAP29	1.15876	0	0	0	0	0.509682	0	1.34469	0	0	0	0
BCAP31	1.80798	1.35422	0.627609	5.95228	0.757621	1.48471	2.11311	9.00736	4.47378	2.026	2.95955	8.534
BCAP31	8.72812	11.6715	3.74055	11.0183	10.1483	17.3372	2.04861	7.93503	7.03678	5.12316	0	6.96371
BCAP31	14.4174	14.7931	7.9042	34.9225	27.2828	19.5718	19.0443	37.2411	36.0177	29.0059	15.7822	33.8541
BCAP31	2.45727	1.73946	0.373134	1.55324	0.739588	1.26088	0	1.44445	3.12872	0.451513	0	0
BCAR1	0	0.0962036	0	0	0.0957589	0.252316	0	0	0.149424	0.261594	0	0.507004
BCAR1	0	0	0	0	0	0	0	0	0	0.0489973	0	0.109839
BCAR1	0	0	0	1.0145	0	0	0.117132	0.482194	0	0.0507364	0.213004	0.113737
BCAR1	0.0230864	0	0	0	0	0	0	0.284141	0	0	0	0.125943
BCAR1	0.0328827	0	0	0	0	0	0	0	0	0	0	0
BCAR1	0	0	0	0	0	0	0	0	0	0.0517263	0	0.115956
BCAR1	0.0607906	0	0	0	0	0	0	0	0	0.0510357	0	0.114408
BCAR3	0.0744035	0	0.067645	0	0	0.316188	0.0882191	0	0	0	0	0
BCAR3	0	0	0	0	0	0	0	0.0704733	0	0	0	0
BCAR3	0	0	0	0	0	0	0	0.0709822	0.0975478	0	0	0.282064
BCAR3	0.0810969	0.191107	0	0	0	0	0	0	0.150093	0.0836739	0.322388	0
BCAR4	0.045245	0.0740473	0.129604	0	0	0	0	0	0	0	0	0
BCAS1	0.0592678	0.127575	0.0497773	0.031595	0.0479034	0	0.0365651	0	0.0542999	0.0299796	0	0
BCAS2	22.6694	53.0299	32.5743	37.8915	23.7989	35.6925	24.7096	38.9161	29.7324	47.0047	24.8861	27.4111
BCAS3	5.89415	5.01396	2.30516	0.584619	7.61231	5.62631	2.67333	0.852909	7.6227	7.54095	1.67612	1.51194
BCAS4	12.7865	13.7195	4.65299	8.46924	4.69067	6.0884	1.9386	3.81677	2.272	2.95075	0.969597	2.00786
BCAT1	0	0	0	0.0298313	0	0.0227924	0	0.0410467	0	0	0	0
BCAT1	0	0	0	0.440163	0	0	0	0.47997	0	0.0561354	0.196587	0.242531
BCAT1	0.0561959	0.0216119	0.117156	1.73871	0.0298401	0	0.157263	1.03484	0.0593069	0	0.19069	0.615348
BCAT2	2.42488	0	1.18879	8.58169	4.79109	0	0	0	3.04064	0	0	0
BCAT2	2.05031	4.28765	3.3168	36.7018	3.40298	6.50614	3.56878	34.0076	4.33095	5.28094	1.95897	33.571
BCCIP	14.0927	19.6173	54.0343	86.0272	16.2747	18.4286	34.1631	88.9007	14.8073	19.4431	36.7024	76.5922
BCDIN3D	1.11444	0.776321	1.9415	1.42816	0.861358	0.805204	1.12966	1.50605	0.750369	0.794855	1.13904	1.00951
BCDIN3D-AS1	0.441711	0.242322	0.232621	0.583414	0.224522	0	0	0.107543	0.126733	0.07463	0.175553	0
BCHE	0.0168333	0	0	0	0	0	0	0	0	0	0	0
BCKDHA	16.9606	13.5998	9.58402	22.4747	23.7605	21.1141	12.0075	20.0973	23.846	18.1615	9.18195	26.4878
BCKDHB	5.6074	4.38721	1.25625	2.11224	5.22081	5.90595	1.13794	1.94402	6.31912	4.56175	1.11842	2.3171
BCKDK	6.82288	4.87347	5.08771	30.9894	10.9986	7.95394	7.48022	36.9173	9.51986	8.25867	7.90302	48.0972
BCL10	2.97533	9.60885	5.96453	6.4816	4.56724	5.74189	8.79094	6.83863	3.3782	5.83752	9.31559	4.46989
BCL11A	0.148621	0.0931802	0.0145456	0.0366211	0	0	0	0.026946	0.0317343	0.0524707	0.0291184	0
BCL11B	67.5169	52.8769	18.9729	19.961	65.3446	69.7898	23.6229	14.7224	71.0839	51.403	17.0911	13.799
BCL2	30.107	36.54	59.517	29.0401	44.6642	69.1673	59.314	32.4551	55.7154	44.8165	47.5509	36.9591
BCL2A1	5.26814	35.9426	341.46	81.4728	2.43899	4.66893	149.655	82.6811	2.552	5.98947	124.619	52.8194
BCL2L1	4.64335	4.09244	28.2377	147.591	13.3987	10.5624	36.1593	164.133	16.8658	10.2987	82.9311	171.268
BCL2L10	0.0928774	0.12495	0	0.247559	0.750685	0.245782	0	0.180632	0	0.117451	0	0
BCL2L11	9.7119	8.61811	15.7873	16.1115	10.2829	6.4906	14.1115	23.7606	7.89696	8.04965	17.7561	20.7743
BCL2L12	22.416	14.904	8.25773	19.7477	24.9098	23.6543	7.1469	20.6387	41.2724	19.138	4.46555	16.154
BCL2L13	8.2015	6.27435	6.79824	11.8439	8.70661	4.40553	5.51302	9.47517	8.80376	5.51081	4.888	8.72765
BCL2L14	0.397225	0.351535	0.0341532	0	0	0.23025	0	0	0	0.0955049	0.136713	0
BCL2L14	0.096439	0	0.0342619	0.990178	0	0.230983	0	2.42364	0.700286	0.290938	0.138089	1.27056
BCL2L15	0.198791	0.189435	0.0956534	0.0883109	0.234315	0.175354	0.102203	0.128873	0.189717	0.167591	0.139263	0.0602612
BCL2L2	0	0.228798	0.0667893	0.0461022	0.152277	0	0.0356921	0.0450059	0.185337	0	0	0.0841795
BCL2L2,BCL2L2-PABPN1	0.845688	0.364093	0.0659556	0.0455268	0.150377	2.00098	0.0352466	0.0444441	0.183024	0.924884	0	0.0831288
BCL3	17.9438	61.0935	52.1063	26.3879	49.6535	111.461	97.0021	53.5502	53.5505	150.959	79.0454	76.5275
BCL6	1.33152	4.70273	4.51606	5.53372	1.43097	6.07706	8.87711	4.72709	2.196	6.46172	2.44047	6.01571
BCL6	1.57183	1.45375	2.26816	2.10404	0.764378	0.73116	3.74324	4.22266	0	2.85447	13.0845	3.54382
BCL6	0.216125	6.68611	5.10539	3.21626	1.99255	2.37071	0.492251	5.55211	3.12559	9.82855	0	9.31242
BCL6B	0.0467417	0.0157206	0.0613391	0.0934405	0	0.123693	0.0360465	0.0909055	0	0.0591087	0	0.0850154
BCL7A	1.35371	1.33547	0.72236	6.46517	1.18483	1.55192	0.382456	3.42251	1.44655	1.51196	0.52137	2.95409
BCL7B	5.85327	4.5188	3.81338	3.6858	4.25594	3.32928	1.29338	3.97766	1.3749	4.52948	5.70874	2.78529
BCL7B	23.1167	63.0797	67.6728	52.4281	36.0595	68.2289	64.0602	56.3234	36.3148	76.8275	59.5825	64.6311
BCL7C	22.8759	27.4169	8.89572	31.8622	53.1451	56.8709	17.7335	36.6852	50.2929	55.3065	18.8743	48.1951
BCL9	6.898	5.18303	13.829	17.0042	4.61517	3.36948	4.89953	12.2795	4.26932	4.1997	7.11754	12.0808
BCL9L	72.8083	84.9069	41.1453	13.3727	97.1742	118.192	56.5116	10.8425	99.7472	114.464	41.8828	13.0449
BCLAF1	34.1544	37.5596	17.818	31.0217	22.6061	21.744	13.2247	28.9165	18.4932	25.222	12.2216	21.0663
BCMO1	0.0339441	0	0.0178179	0	0.137177	0	0	0.066016	0	0	0	0
BCO2	0	0	0.0801587	0	0	0	0	0.17803	0	0.0770774	0	0
BCO2	0.301772	0.2776	0	0	0.320346	0	0	0	0	0	0	0
BCOR	6.37886	4.10876	30.8933	19.366	5.99107	4.14688	32.4201	24.0276	7.64479	10.9596	23.6657	31.4167
BCOR	0.854651	1.01168	2.47604	9.36268	1.74308	3.08699	0	7.54098	0.659089	1.89094	6.40236	6.84193
BCORL1	1.57783	1.50843	2.46346	6.93232	3.45682	2.17183	3.13782	8.11558	3.94487	2.82118	3.81405	7.44257
BCORP1	9.2176	4.673	1.12771	0.603112	3.00251	0.961936	0.31129	0.443752	1.77264	0.936513	0.399848	0.163353
BCR	18.2311	20.4933	13.1466	16.8316	28.5259	35.2772	23.0382	17.758	27.3958	28.829	15.7888	15.5275
BCRP2	0	0	0	0	0.0713215	0	0	0	0	0	0	0
BCRP3	0.25991	0.232426	0.181339	0.0770474	0.233634	0.305978	0.267469	0.112436	0	0.0731081	0	0
BCS1L	9.03611	5.97016	5.06664	27.7542	9.0564	6.90883	4.35344	24.6247	9.46365	5.72035	4.72889	25.861
BCYRN1	0	0	0	0	0	0	0	0	0	0	0	0
BDH1	5.36387	4.44176	1.41121	16.5421	3.92307	2.95409	1.00025	15.8156	4.16906	2.20466	0.742301	11.6542
BDH1	0	0	0	0	0	0	0	0	0	0	0	0
BDH2	2.60971	1.3664	0.829338	0.601603	1.76726	0.821267	0.60921	0.384091	1.61551	1.07033	0.770821	0.410519
BDKRB1	0	0	0.0332391	0	0.127951	0	0	0	0	0	0	0
BDKRB2	0.00981442	0.0132035	0	0	0.0396627	0	0	0	0	0	0.0412529	0
BDNF	0	0.0612575	0	0	0	0.0952806	0	0	0	0	0	0
BDNF	0	0	0	0	0	0	0	0.0402869	0	0	0	0
BDNF	0.023601	0	0	0	0	0	0	0	0	0	0	0
BDNF	0	0	0	0	0	0	0	0	0	0	0	0
BDNF	0.0263203	0	0	0	0	0	0	0	0	0	0	0
BDNF	0	0	0	0	0	0	0	0	0	0	0	0
BDNF	0	0	0	0	0	0	0	0	0	0	0	0
BDNF	0	0	0	0	0	0	0	0	0	0	0	0
BDNF	0.015334	0	0	0	0.0924827	0	0	0	0	0	0	0
BDNF-AS	0.721477	0.719974	0.197674	0	0.423994	0	0	0	0.294337	0.0988664	0	0
BDP1	8.81471	6.64482	11.2493	9.51701	5.74171	4.11412	10.1995	9.59155	5.02611	4.5058	9.56755	9.28126
BEAN1	0.0433979	0.118301	0	0	0	0	0	0	0	0.0911378	0	0
BECN1	25.4942	23.4862	26.1862	44.3942	28.8676	31.4254	25.1927	42.3586	27.4514	27.9225	27.2977	45.303
BEGAIN	0.0674037	0.0604529	0.0235877	0.538982	0.151331	0.237828	0.115513	0.611752	0.171538	0.132592	0	0.38141
BEGAIN	0.0692676	0.0621247	0.0242399	0.553886	0.155516	0.244405	0.118707	0.628669	0.176282	0.136258	0	0.391957
BEND2	0	0	0	0	0	0	0	0	0	0	0	0
BEND3	0.259764	0.490915	6.12948	5.48963	0.249947	0.327341	4.00652	3.80104	0.368318	0.547487	3.76953	3.59975
BEND4	0.0747812	0.0501367	0.0393548	0.0872944	0.0530267	0.0487796	0.0255086	0.0908401	0.0423279	0	0	0
BEND5	1.98511	2.25333	0.553576	0.0826751	0.250699	0.164163	0.0956806	0.120648	0.142087	0.235344	0	0
BEND6	0	0.0410787	0.0480845	0.040694	0.0616992	0	0	0	0	0	0	0
BEND7	0	0	0	0	0	0	0	0	0	0	0	0
BEST1	0.327849	0.173427	0.222868	0	0.197884	0.081377	0.249121	0	0.211376	0.155216	0.0646942	0
BEST2	0.129396	0.0870396	0	0.057483	0.174308	0	0	0	0.0987917	0.054544	0	0
BEST3	0	0	0	0	0	0	0	0	0	0	0	0
BEST3	0	0.0313789	0	0	0	0	0	0	0	0	0	0
BEST4	0.471654	0.687402	1.09348	0.104764	0.55594	1.04012	1.03057	0.382206	0.450124	0.39763	1.23906	0.42893
BET1	1.37259	0.887078	1.58227	1.90101	0.543824	0.356107	1.53589	1.67497	0.739727	0.374378	1.13125	1.86015
BET1L	31.0386	33.231	36.9356	20.8453	29.7455	21.9302	30.532	19.188	26.0908	22.2288	23.6045	20.9713
BET3L	0.0371761	0	0	0	0	0	0	0	0	0	0	0
BEX1	0.191142	0.900015	1.55518	0.254739	0	0.505821	0.884435	0.371742	0	0	0	0
BEX2	14.1401	23.9371	15.8691	15.4351	12.4174	24.4046	8.48236	8.63435	11.421	13.5086	6.80825	5.63366
BEX2	4.65354	0	0	0	1.96196	0	0	0	0	0	0	2.04062
BEX2	0	0	0	0	0	0	0	0	0	0	0	0
BEX4	25.4946	31.9858	15.2127	12.7604	17.9167	28.5681	14.9658	7.37293	18.9831	21.7774	10.1284	9.11605
BEX5	0	0.252353	0	0	0.602232	0	0	0	0	0	0	0
BEX5	3.67131	6.36558	5.01579	0.803972	2.61894	4.79074	2.7917	1.95581	3.4558	2.92545	4.4386	1.46342
BFAR	7.55329	6.20985	8.86766	9.66954	6.07215	3.43885	9.31161	11.057	6.32487	5.20382	11.2088	9.74967
BFSP1	0	0	0	0.04977	0.301373	0.592058	0.230314	0.29007	0.940204	0.849933	0.31378	0.135847
BFSP1	0	0	0.0419012	0	0	0	0	0	0	0	0	0.145264
BFSP2	0.0759984	0.0340807	0	0	0.102377	0.268154	0.078145	0	0.812327	0.128142	0.212962	0
BGLAP	1.22597	1.10431	2.81681	2.08417	1.67716	2.2127	1.86516	0	1.02928	1.54808	2.68556	0
BGN	0	0	0	0	0	0	0	0	0	0	0	0
BHLHA15	0.525099	0.156984	0.367513	0.622054	0.707356	0.308795	0.179977	0.453883	0	0.147562	0.490477	0
BHLHA9	0.0581796	0.15654	0	0.155074	0	0	0	0	0	0	0	0.423276
BHLHB9	0.636165	0.531799	0.075869	0.629694	0.498837	0	0.0955164	0.199902	0.376795	0	0.172945	0
BHLHB9	0	0	0	0	0	0	0	0	0	0.18447	0	0.453972
BHLHE22	0.0121257	0	0	0	0	0.0641769	0.0374047	0.0471654	0.0555467	0.0920039	0.050968	0
BHLHE23	0	0	0.040912	0	0.157488	0	0.120212	0	0.178517	0.0985611	0	0
BHLHE40	8.93334	31.7989	88.0274	15.5968	102.435	194.8	211.829	29.2031	180.047	379.907	215.31	39.8058
BHLHE41	0.0108971	0.0439803	0.0228804	0.0580913	0	0	0.0336148	0.0423865	0	0	0.0458038	0
BHMT	0.0329529	0.0664982	0	0	0.0665858	0	0	0	0	0	0	0
BHMT2	0.0326159	0	0	0	0	0	0	0	0	0	0	0
BICC1	0.0396195	0.017767	0.0693236	0.0352012	0.0533711	0	0	0	0	0	0	0
BICD1	2.98969	2.31394	0.710776	3.02987	1.77321	2.05677	0.463975	1.781	1.78027	1.45856	0.63216	1.67858
BICD2	7.21193	7.32136	11.5812	19.8183	12.7745	13.3646	20.6709	21.1711	13.4487	11.5497	19.3718	21.2119
BID	0	0.0695908	0.171966	0.107174	0	0.184784	0.106382	0	0.540632	0.0973213	0.513639	0.576864
BID	4.52105	3.44962	6.82086	16.4611	8.62441	5.96656	10.251	10.9756	6.83059	7.41145	9.7463	13.6439
BID	0	0	0	0	0	0	0	0	0	0	0	0
BIK	0.605116	1.97704	3.13099	7.48847	0.698696	4.11769	5.06655	5.2118	1.78198	3.60746	5.63199	4.08796
BIN1	55.0268	50.3822	14.033	15.16	83.182	95.9135	27.929	17.778	95.3726	88.5756	24.8317	18.1744
[truncated: 26,270 more rows]

## Sheet: CYTOSKELETON
DOWNREGULATED FOLLOWING ACTIVATION														UPREGULATED FOLLOWING ACTIVATION
	NAÏVE CD4+ T CELLS				CENTRAL MEMORY CD4+ T CELLS				TRANSITIONAL MEMORY CD4+ T CELLS						NAÏVE CD4+ T CELLS				CENTRAL MEMORY CD4+ T CELLS				TRANSITIONAL MEMORY CD4+ T CELLS
GENE	0H	40MIN	150MIN	15HR	0H	40MIN	150MIN	15HR	0H	40MIN	150MIN	15HR		GENE	0H	40MIN	150MIN	15HR	0H	40MIN	150MIN	15HR	0H	40MIN	150MIN	15HR
Rho Signaling														Rho Signaling
ARHGDIB	529.184	550.096	372.34	118.641	597.136	544.485	339.29	128.862	607.353	627.73	298.863	130.617		ARHGDIA	116.104	240.017	425.101	622.523	315.85	454.157	450.965	633.32	422.202	456.534	404.097	685.55
ARHGEF1	205.978	212.127	95.6816	53.3217	226.988	269.181	131.817	56.82	221.245	197.512	92.0432	59.3855
ARHGAP4	107.618	131.297	64.7702	40.2135	154.606	223.94	94.7329	32.4178	160.4	140.041	68.842	34.74		Lamins
ARHGAP30	75.7307	55.997	31.2112	40.5111	99.6518	96.1818	62.6697	55.1168	118.587	79.7759	54.8942	62.2031		LMNA	1.83949	53.5233	173.81	66.7041	37.6033	506.003	684.87	122.397	96.881	693.517	703.541	219.32
DEF6	66.1462	64.1523	28.2706	28.5002	80.4771	88.0202	47.8703	29.7274	71.9101	65.2934	37.2519	30.0201		LMNB2	6.19109	6.27657	23.4751	72.864	9.31971	11.5952	27.826	65.1717	9.34521	10.88	26.433	62.4654
FGD3	63.671	61.5492	15.7405	11.3195	66.4025	82.9226	24.3187	10.1617	83.1658	72.6462	11.0338	10.024
FAM65B	62.8318	45.7508	6.55404	1.43086	56.0027	36.0534	8.1984	1.95664	44.0461	29.1266	7.35751	2.74965
FAM65B	59.2023	37.7756	8.26074	3.23657	35.9078	18.6679	9.91599	3.3759	27.172	18.5564	8.02452	3.87087
Actin/Myosin Regulation														Actin/Myosin Regulation
TMSB4X	582.897	411.165	287.239	81.6898	687.559	500.831	340.184	134.749	362.985	524.87	578.595	156.271		ACTB	594.157	777.311	1854.65	3111.88	1023.41	974.543	1124.43	2986.55	1018.85	862.352	1046.57	3141.01
LSP1	158.701	198.237	72.2127	32.0519	330.745	402.828	145.366	85.9067	461.138	410.254	131.176	116.096		ACTG1	313.547	394.027	805.262	1552.53	548.18	479.652	541.478	1755.36	489.848	504.863	600.694	1982.39
CNN2	139.51	139.484	65.129	29.167	217.188	220.668	56.5008	24.6234	211.566	202.423	36.2039	32.7904		PFN1	272.918	314.71	371.265	1740.43	752.444	872.834	393.014	1678.03	871.163	858.695	383.06	1770.85
ABLIM1	67.7963	52.9143	69.5633	22.079	31.4314	22.8285	47.8901	13.9828	24.0384	20.384	30.3935	10.2097		ARPC4	36.2551	41.9083	55.0588	112.313	72.9717	63.9653	65.4885	127.513	75.7784	69.2988	67.1982	138.445
MYO1G	56.542	54.4857	17.9755	35.6265	166.008	178.716	75.2928	133.786	201.525	184.275	93.3542	226.656		DIAPH1	46.9596	41.7968	56.8216	83.5362	69.8089	60.6681	93.2387	91.7446	81.2254	69.2505	104.336	82.2111
BIN1	55.0268	50.3822	14.033	15.16	83.182	95.9135	27.929	17.778	95.3726	88.5756	24.8317	18.1744		TPM3	41.7494	38.9796	34.4795	83.9468	55.8446	74.9864	51.2402	102.566	70.8703	68.3751	57.9063	112.483
BIN2	81.8606	63.5608	9.09474	5.21403	96.596	70.6976	15.2867	7.17407	96.6929	86.651	13.234	8.67457		DBNL	41.5726	42.9746	33.6109	101.531	61.3136	63.2288	36.3807	104.51	67.4002	54.663	34.5467	106.725
DENND1C	77.5631	71.7523	21.6143	35.1179	84.6914	71.8377	21.7759	30.2098	79.595	65.5266	16.1678	39.6713		ARPC5	35.403	24.4664	39.2034	58.4965	37.8276	30.7926	39.618	62.272	42.1533	29.9301	41.7563	60.3248
WIPF1	81.6782	58.823	35.926	4.51062	83.581	21.6916	30.9987	34.6291	122.188	86.918	19.133	22.6325		ARPC5L	13.3419	12.9212	26.2417	125.11	29.0704	29.7768	42.024	145.84	27.4294	29.8816	45.4382	152.032
EVL	294.174	229.723	58.903	47.088	376.849	281.21	81.4671	49.8407	368.984	270.854	85.5352	62.3111		BRK1	23.5728	20.5451	41.0745	57.8838	27.6025	29.1049	34.4671	55.9956	45.7289	31.803	35.3343	49.6917
Intermediate Filaments														NAA20	7.24964	7.3677	34.909	54.1769	9.9	10.0449	27.4137	61.3142	13.3531	10.0027	23.2741	51.3717
VIM	369.351	511.19	1359.27	129.325	990.214	1203.23	3292.42	233.055	967.135	1635.41	3936.87	427.351		PFDN6	15.893	12.0812	29.5184	140.04	19.8249	19.9015	23.5413	133.628	25.5894	24.495	33.9194	158.916
														RHOF	31.2474	27.781	49.6011	50.7818	52.3418	46.1486	80.5718	46.0545	57.2588	62.4116	87.4951	53.1758
Integrin Recycling
CD37	322.832	362.283	196.142	110.276	428.855	445.239	217.285	94.1035	403.868	440.731	204.611	120.381
CYTH1	102.377	121.985	54.5772	31.1845	138.247	179.572	101.43	65.7924	125.719	155.012	84.9779	82.5978
FYB	180.727	130.974	53.8256	11.9397	146.544	84.6454	37.4421	9.47558	117.425	96.6386	28.8813	7.83183
Metastasis
MALAT1	410.662	239.774	333.64	86.2376	234.679	158.267	181.497	76.0345	170.401	158.356	232.375	68.7331
AHNAK	60.817	51.1367	50.9444	1.12038	187.788	153.98	129.63	4.53028	226.435	195.993	132.444	9.30173
LIMD2	104.116	145.4	109.169	45.4162	133.597	158.683	96.7819	35.7496	144.131	132.753	77.6026	31.7328
Adhesion Removal
CD52	801.826	682.039	233.738	27.0161	986.235	957.978	276.764	46.6545	1134.66	1425.32	418.062	65.2224
Adhesion Receptors														Adhesion Receptors
ICAM3	108.786	114.971	64.04	41.203	195.455	259.896	129.491	49.4164	242.331	252.605	137.246	53.7065		CD2	91.6106	66.7082	243.11	278.461	152.982	86.8618	263.672	394.744	145.062	129.833	328.522	411.251
SELPLG	87.8282	46.8319	34.8616	13.6593	174.251	106.158	92.347	25.0572	167.237	118.685	86.1675	40.2054		CD164	39.6226	40.4648	70.0102	68.3313	40.9481	45.4126	67.3433	83.9	39.0574	38.8967	71.4916	94.7022
SELL	325.822	190.486	183.065	46.6233	169.872	88.2921	84.7645	48.7479	84.0685	51.4884	35.9486	21.3516
Focal Adhesions														Focal Adhesions
PXN	60.8799	62.4932	54.6773	28.9408	84.9336	88.8044	56.1786	27.6035	102.138	104.665	60.7035	30.9024		LPXN	33.5251	23.002	105.22	60.2142	44.2761	26.0641	88.9396	66.2424	36.8105	34.1037	98.1033	77.8938
SIPA1	54.6291	48.5071	17.9165	32.1423	78.7352	90.7113	35.7054	27.2119	65.6552	59.5573	25.8139	29.4016		VASP	16.8182	15.0274	95.7034	62.6153	40.6348	41.2218	71.7439	90.2554	48.6974	43.4004	79.9158	101.551
ADD3	88.3364	57.935	23.4594	4.46231	66.2457	37.3496	22.1281	4.46521	54.7453	36.5549	17.8733	3.39546		DIAPH1	46.9596	41.7968	56.8216	83.5362	69.8089	60.6681	93.2387	91.7446	81.2254	69.2505	104.336	82.2111
ADD1	53.8172	46.5428	27.6032	42.3698	69.8402	58.2228	33.2267	42.8929	70.9535	61.3587	34.1199	49.2908		ACTN4	15.9751	16.8202	13.3689	66.6663	89.7147	88.6247	73.46	152.951	130.472	132.863	117.708	217.726
SPTAN1	50.4868	38.138	31.231	22.6605	72.6204	59.0025	55.7003	23.256	69.2258	61.4871	51.6908	25.8368		FERMT3	33.8901	32.7241	30.5071	173.464	82.2988	76.1453	45.9138	161.421	104.669	71.1888	49.126	165.905
EPB41	64.1043	46.3879	27.145	21.8729	50.2314	28.8048	27.1028	22.9997	41.5986	29.9276	23.1839	19.9971		AAMP	14.2894	17.833	41.5075	82.8496	21.1678	26.3848	47.6224	78.2786	21.9948	21.4401	40.3635	74.5437
Other														Other
CDC42SE2	68.6698	53.9289	50.6483	37.9582	65.929	47.2267	76.9118	41.4122	67.5072	51.5193	57.0647	35.1634		CD63	4.47236	3.57173	9.05927	63.6795	8.93566	25.1886	15.5433	53.3168	8.33329	18.8908	27.3153	67.6901
CDC42SE1	112.492	97.198	45.0667	39.1884	102.748	81.4532	68.4128	49.6748	107.235	91.6144	63.2478	45.6296		RLTPR	40.5049	38.5971	24.7278	89.065	49.2865	48.3558	23.7945	64.3821	45.9639	36.1568	19.9423	57.2764
Integrins														Hippo Pathway
ITGB7	95.7608	85.3526	34.5047	16.4827	162.259	146.887	76.3025	72.854	165.744	141.474	70.1675	114.637		MOB1A	31.366	36.735	45.1313	51.3852	38.2029	34.9405	46.4658	56.662	31.2357	37.3916	47.8117	50.5103
ITGAL	71.2435	61.8489	15.3671	22.6973	125.053	109.958	35.3368	47.0117	136.042	119.295	30.6688	66.3271
ITGB2	87.8765	72.2664	16.1255	12.3524	135.057	65.0966	30.0907	14.7912	81.6705	72.5191	24.411	20.1585		Notch Signaling
ITGB1	19.8279	13.2884	13.4436	8.93639	63.922	41.3598	45.0671	25.7991	64.128	58.5145	50.8321	25.0251		NOTCH1	16.2061	18.4876	29.3892	79.2113	17.2643	21.8361	47.0799	71.0005	14.6975	15.3326	40.1226	85.8898
Calcium Signaling
S100A4	86.4466	79.0615	26.8584	3.21615	369.017	433.675	164.909	20.8093	550.05	567.704	316.867	38.912
LINC Complexes
SUN2	149.148	159.249	49.6973	11.9251	235.336	266.979	92.2268	20.2955	227.886	183.409	62.1004	28.3649
Caveolae
FLOT2	69.3457	59.6682	13.6041	25.1956	90.2526	98.4851	22.7382	31.472	91.6934	74.4532	17.8927	34.4995
Microtubules														Microtubules
NUMA1	80.0196	72.6618	32.3473	47.9766	84.7153	83.5937	43.3253	39.4334	66.0098	67.1557	32.5503	43.321		TUBA1B	17.7374	27.3436	49.0478	259.276	17.3975	25.5236	67.0514	277.893	25.5397	29.9269	80.1914	260.658
														TUBB	29.3298	28.4329	44.0626	502.755	34.5264	28.184	56.3932	491.89	39.7446	39.3136	55.0863	458.269
Septins														TUBA1C	3.42154	5.45945	53.8253	126.831	8.25355	11.09	64.1456	152.793	8.86962	10.3307	68.787	130.06
SEPTIN1	98.2603	102.283	52.3474	85.5617	152.185	144.599	55.6664	96.6863	155.419	129.336	48.2963	108.401		TUBB4B	12.8887	45.949	193.44	340.08	47.2451	114.361	311.005	361	64.3996	116.428	263.209	360.896
SEPTIN2	25.5667	19.1576	34.3847	42.5065	26.5534	17.1206	35.3029	56.9485	32.1464	21.4154	35.4561	46.8869		KLC2	1.61327	5.81452	28.8296	66.0593	7.81825	13.6571	31.4732	56.1637	10.9532	14.8133	30.4809	48.256
SEPTIN6	112.696	81.083	65.8312	36.9396	74.4845	59.092	64.8521	34.6385	58.9796	56.6763	53.8484	36.8633		DIAPH1	46.9596	41.7968	56.8216	83.5362	69.8089	60.6681	93.2387	91.7446	81.2254	69.2505	104.336	82.2111
SEPTIN9	68.1296	93.8096	12.6145	8.82473	227.399	294.572	38.5955	16.9002	296.051	285.443	41.8715	31.4781		ZNF207	48.625	47.232	86.5662	86.07	38.6832	33.2563	70.8635	81.8932	33.4028	30.0764	57.1662	89.4671
SEPTIN9	155.662	148.916	33.1608	98.6256	143.696	96.8335	51.5014	106.095	114.898	69.3888	35.987	94.9422		BUB3	36.9617	24.3565	25.2382	61.2642	38.6963	32.0355	26.9591	69.7741	35.3696	27.8812	38.2557	71.7684
														DYNLL1	12.6299	14.945	23.8348	77.1629	21.8666	35.8898	39.911	110.277	37.0364	34.588	39.6794	82.8404
														MOB1A	31.366	36.735	45.1313	51.3852	38.2029	34.9405	46.4658	56.662	31.2357	37.3916	47.8117	50.5103
														NUDC	16.381	19.1645	47.442	182.584	22.0361	31.7454	40.1586	143.342	28.309	30.1677	35.6208	126.616
														PFDN6	15.893	12.0812	29.5184	140.04	19.8249	19.9015	23.5413	133.628	25.5894	24.495	33.9194	158.916
														SSNA1	16.0212	21.0825	17.2792	113.643	37.3262	50.2741	31.1921	107.098	53.3391	38.306	19.1354	118.152
														TBCA	20.8686	17.9548	16.3041	84.7294	25.9871	36.9235	17.7777	86.1276	26.4002	32.834	22.4391	82.0918

## Sheet: METABOLISM
DOWNREGULATED FOLLOWING ACTIVATION														UPREGULATED FOLLOWING ACTIVATION
	NAÏVE CD4+ T CELLS				CENTRAL MEMORY CD4+ T CELLS				TRANSITIONAL MEMORY CD4+ T CELLS						NAÏVE CD4+ T CELLS				CENTRAL MEMORY CD4+ T CELLS				TRANSITIONAL MEMORY CD4+ T CELLS
GENE	0H	40MIN	150MIN	15HR	0H	40MIN	150MIN	15HR	0H	40MIN	150MIN	15HR		GENE	0H	40MIN	150MIN	15HR	0H	40MIN	150MIN	15HR	0H	40MIN	150MIN	15HR
Authophagy														Glycolysis
GABARAP	63.2858	58.6421	34.3822	26.4338	76.8011	57.859	45.9593	36.2426	82.6188	72.097	36.8379	36.579		PKM	108.229	101.37	595.033	1253.9	159.467	154.826	474.029	1114.16	174.042	161.72	550.534	1062.37
														ALDOA	110.92	158.127	259.129	755.256	230.757	251.764	292.085	729.077	278.286	258.514	232.852	649.177
Mitochondria Uncoupling														GAPDH	126.884	137.724	221.012	1264.24	257.244	260.024	368.065	1193.2	250.533	306.314	383.711	1126.96
UCP2	292.517	273.709	122.77	24.3465	388.855	327.941	180.869	65.0228	391.828	306.335	128.539	96.3124		ENO1	42.7723	43.2624	253.151	1169.03	73.2108	85.4329	168.817	985.241	87.9733	87.8524	149.322	812
														LDHA	41.5919	60.961	140.416	362.821	56.8196	49.9603	146.022	446.755	62.5168	74.7752	167.932	377.799
Fatty Acid Oxidation														ENO1	24.8124	27.3831	118.392	476.642	32.1936	31.373	110.064	410.703	40.5765	21.2338	100.138	439.668
PNPLA2	61.6764	104.163	100.493	40.5785	93.6234	119.649	83.8192	39.7416	89.1759	109.03	62.4924	42.9701		PFKP	14.5769	14.1737	72.438	194.77	37.9037	38.9194	129.864	204.949	37.8988	37.0833	163.629	195.735
ACADVL	61.291	68.1443	39.2625	29.7133	86.9118	116.515	52.3844	38.8605	102.076	93.5239	48.4775	47.6375		PGK1	40.2561	42.6763	66.6419	137.297	44.7249	37.4295	79.133	144.946	40.8846	48.7143	90.0347	132.71
LDLRAP1	74.2282	45.8237	14.4834	5.5738	58.1916	43.0818	17.4469	3.49374	40.1172	29.8162	6.54799	4.28842		HK1	28.8041	22.2057	28.1006	73.5097	44.1738	42.0755	46.7882	91.3445	52.8708	47.1565	54.6665	100.778
LRP10	48.276	55.1594	20.2382	26.8232	91.581	109.474	45.3129	39.8334	100.965	92.1263	44.2168	55.8786		GPI	23.167	24.0961	17.2956	119.858	33.022	32.6952	21.3587	108.744	40.0794	36.4275	19.4228	105.197
SORL1	62.8509	54.4304	18.4003	5.93338	54.0824	50.186	23.0783	4.07378	53.5828	49.6258	19.171	4.06928		TPI1	9.781	7.72236	14.174	168.524	21.0604	16.4474	22.326	166.492	26.6427	17.3694	22.2469	149.624
LSR	27.9158	46.3137	50.2886	24.4823	57.8214	83.9692	74.7866	30.2689	57.8286	67.302	58.8867	32.3621		TKT	45.4295	51.8749	38.2887	289.901	73.9173	82.2944	44.1833	260.435	65.0976	79.3758	47.4718	259.127
CPT1A	18.3139	13.2287	3.69423	2.67487	25.731	18.9212	8.56221	4.08655	23.5993	22.1513	8.56865	4.27675
CPT1B	22.496	18.064	5.84367	10.1683	15.4913	13.074	4.95379	5.0034	21.4162	16.2077	6.19372	3.83363		FA Oxidation
DGKA	194.524	146.782	30.605	24.5617	167.519	104.519	38.7529	38.4733	128.842	102.179	30.5939	39.6704		G0S2	0.0855475	0.172633	0.134717	19.7239	0.518581	1.13193	2.37502	54.5716	0.587826	1.19	2.15749	86.8229
UCP2	292.517	273.709	122.77	24.3465	388.855	327.941	180.869	65.0228	391.828	306.335	128.539	96.3124
Calcium Signaling														Pentose Phosphate Pathway
TMEM66	465.916	530.495	366.098	106.016	331.245	420.139	409.471	97.332	286.14	336.25	348.904	93.9813		G6PD	12.2541	12.6992	8.44005	53.9362	12.2461	17.4962	8.11493	43.0917	15.0306	12.9777	8.37986	56.2285
DGKA	194.524	146.782	30.605	24.5617	167.519	104.519	38.7529	38.4733	128.842	102.179	30.5939	39.6704		PGD	9.86716	8.32515	11.5868	58.4389	9.1955	9.45418	14.3004	53.5172	7.59834	9.62728	15.1954	49.8176
														TKT	45.4295	51.8749	38.2887	289.901	73.9173	82.2944	44.1833	260.435	65.0976	79.3758	47.4718	259.127
Potassium Signaling														RPIA	11.9935	14.8962	17.8729	61.8406	11.8903	13.6701	13.995	51.718	10.3914	12.0425	11.0454	37.0922
KCNA3	55.5452	41.3875	7.61229	8.7939	60.7451	44.6312	22.5571	20.4466	58.4235	41.1921	20.5944	30.0037		TALDO1	28.2671	24.8767	14.2291	186.197	45.9351	42.6196	16.1513	138.953	44.1749	41.4872	17.272	129.949						GMPS	13.0986	9.90524	7.41276	33.8855	17.148	11.6283	9.51944	35.5539	16.9024	11.7923	7.75456	29.0406
																																PFAS	3.0291	3.22098	11.1142	59.7386	3.52404	2.99585	4.55401	48.3489	2.97843	2.012	3.63317	40.1242
Lipid Peroxidation Detox														Glutamine Utilization																		CTPS1	3.10318	5.28341	34.3762	66.7885	2.49775	3.95265	18.8272	60.2519	3.00822	5.7642	21.1619	49.0878
GSTK1	161.841	144.448	61.6575	38.6059	272.466	232.731	97.1233	43.6852	290.658	269.147	101.696	47.8287		GLS	16.0339	18.4297	107.246	124.9	17.0457	24.5198	95.7333	103.409	17.8223	22.7234	78.8615	103.922						CAD	8.7563	6.29931	10.6163	71.8255	10.2577	7.54505	7.63313	54.3011	9.95491	5.93592	7.79463	48.2741
UCP2	292.517	273.709	122.77	24.3465	388.855	327.941	180.869	65.0228	391.828	306.335	128.539	96.3124		SLC38A1	48.1559	34.3228	72.8515	71.9327	40.1958	30.2571	74.7407	74.798	39.7384	36.3531	67.4152	58.9702
TXNIP	771.007	293.907	23.1511	22.056	609.896	217.041	35.1629	16.3122	676.829	261.711	23.3651	14.3338		SLC38A5	6.50277	6.74232	4.93534	160.797	14.3951	14.1393	8.30483	186.562	15.7481	14.2467	10.0105	199.485						CAD	8.7563	10.2577	9.95491	6.29931	7.54505	5.93592	10.6163	7.63313	7.79463	71.8255	54.3011	48.2741
														SLC1A5	0.75974	6.39844	197.247	306.587	3.53404	15.3521	232.15	343.23	5.7208	25.5415	242.452	342.828						CTPS1	3.10318	2.49775	3.00822	5.28341	3.95265	5.7642	34.3762	18.8272	21.1619	66.7885	60.2519	49.0878
dNTP Pools														Acetyltransferases																		PFAS	3.0291	3.52404	2.97843	3.22098	2.99585	2.012	11.1142	4.55401	3.63317	59.7386	48.3489	40.1242
SAMHD1	81.5942	60.578	15.7564	17.6021	91.7426	56.3901	18.7897	28.5189	86.5314	52.7723	17.1323	36.1737		NAA20	7.24964	7.3677	34.909	54.1769	9.9	10.0449	27.4137	61.3142	13.3531	10.0027	23.2741	51.3717						GMPS	13.0986	17.148	16.9024	9.90524	11.6283	11.7923	7.41276	9.51944	7.75456	33.8855	35.5539	29.0406
														NAA10	18.1827	21.5017	10.6145	114.446	34.7263	37.8624	15.1406	116.558	36.7676	37.7124	16.8836	124.406
Choline														NAT10	10.9191	10.4571	46.957	87.3159	9.01186	7.49614	27.7428	80.9114	8.57743	9.07404	26.367	73.4519
SLC44A2	90.5688	70.0929	49.2024	32.3939	101.099	75.5188	39.9114	27.581	85.5343	71.3149	34.4724	25.9255
														Organellar Acidification
O-GlcNAc														ATP6V0C	95.2796	268.669	325.534	321.655	167.412	322.618	295.342	328.588	220.673	352.752	215.578	348.375
OGT	107.047	55.3282	167.8	45.0508	68.7457	33.4377	128.675	38.2437	47.8969	26.8126	131.475	33.7668		CLIC1	28.0534	23.5659	61.8414	94.9605	74.2503	63.6077	104.922	145.108	91.8573	93.2698	132.864	160.26
														Polyamine Biosynthesis
														OAZ1	155.275	227.899	309.689	821.432	283.687	357.451	351.255	718.198	301.973	355.081	303.219	661.072
														SRM	35.3021	37.3933	124.501	801.839	51.6524	47.9517	74.3618	696.388	54.5473	44.8469	65.8279	808.169
														ODC1	29.7847	58.022	88.061	393.965	33.9064	61.3216	99.9503	293.402	31.5707	54.4136	90.2636	230.209
														SAT1	31.6396	63.9053	78.9559	10.7751	40.1997	82.6175	110.947	14.9535	43.3841	70.6683	129.329	13.5049
														Reactive Oxygen Species
														SOD1	102.956	146.606	315.525	394.115	128.169	210.554	271.113	293.379	124.947	195.835	209.022	293.468
														PRDX1	13.9692	19.0679	187.982	267.788	26.399	21.9276	132.704	266.859	38.3874	38.2405	162.901	224.404
														CHAC1	0.0791757	0.177508	102.953	116.457	0	0	44.6128	92.1945	0	0.291727	34.5863	77.5534
														AHCY	7.89437	9.28973	14.2251	94.7802	7.91848	7.20813	10.3619	75.1369	7.01004	8.2131	11.2173	58.7542
														SOD2	24.6266	45.0064	32.8731	72.8688	45.3536	82.4017	80.1226	55.4864	43.1115	64.9181	71.7352	58.6602
														CD320	10.4374	13.2882	9.60958	112.951	20.478	25.2666	14.9743	102.585	26.996	23.1502	9.2723	137.98
														GSTP1	19.0907	23.832	24.6012	172.826	28.1495	32.5421	24.9353	136.807	26.3933	36.2126	27.1093	137.327
														PRDX4	2.99653	3.73045	20.0491	58.6514	6.14527	4.73418	16.4176	61.5833	5.53169	3.95903	18.235	58.8946
														ROMO1	17.3493	26.4097	34.8859	82.3106	30.4901	46.3198	37.2096	86.3191	41.5283	48.576	43.5662	64.6372
														TXN	5.97742	8.10195	14.7391	113.251	16.6724	17.7191	27.8935	160.827	26.5378	30.4032	54.0279	159.815
														TXN2	22.5071	20.7392	15.0189	63.9361	25.2936	25.9457	12.2689	55.7655	20.4793	23.7054	10.8859	61.0125
														TXNL1	17.1495	13.9039	27.6804	57.881	17.5273	13.6655	21.4966	71.6388	17.4844	18.5382	25.3684	64.7327
														TXNL4A	10.4537	15.6217	20.3905	69.9759	15.6023	18.2329	23.6355	60.2994	15.781	18.6275	19.8479	50.3426
														TXNRD1	4.04118	3.90965	26.8405	58.4462	6.22413	5.25397	22.9615	50.8083	4.68491	6.81654	29.9293	38.9794
														Na/K Pump
														ATP1A1	93.5366	95.5619	142.583	202.472	96.1796	85.4887	223.369	214.527	89.2658	95.4367	207.756	186.169
														ATP1B3	6.53545	9.09132	44.3876	83.722	9.79202	13.2947	75.2234	99.2626	10.1831	15.3486	55.5948	104.96
														Mitochondrial ATPase
														ATP5B	75.4984	94.4734	153.9	386.746	102.516	102.913	198.904	381.818	95.4211	104.914	183.848	350.574
														SLC25A3	71.8982	136.252	155.276	238.14	68.2642	92.6281	151.166	224.567	75.4149	100.873	135.41	202.303
														SLC25A5	39.7005	50.2871	79.7207	197.264	43.0532	65.9832	72.6592	172.409	45.5174	60.8146	82.8015	159.543
														ATP5J2,ATP5J2-PTCD1	38.4469	31.7874	52.6614	146.541	48.9977	59.949	47.9121	170.046	70.4802	57.9921	53.2283	170.488
														ATP5A1	38.0238	33.401	25.358	105.524	33.746	27.1737	30.7756	70.3699	31.5122	24.9645	27.0294	67.9636
														ATP5C1	36.8814	28.1077	43.0749	100.434	33.3397	29.7585	37.3738	93.0961	35.9479	30.9092	35.1858	80.7528
														ATP5G1	17.6634	16.9322	29.1566	127.425	19.6513	19.3022	18.1203	98.3965	17.7603	26.4062	20.8196	101.584
														ATP5G3	8.02451	14.0248	15.8837	63.2131	8.84408	13.2609	10.2976	56.6523	9.19712	16.3352	13.9328	59.9931
														ATP5J	26.402	22.8523	24.8965	67.8909	25.0057	24.0642	18.1406	80.4289	24.9478	26.5184	16.4685	66.6538
														C14orf2	39.3925	42.4748	47.9754	89.5209	48.5903	45.8078	40.0815	92.0878	52.9605	51.5372	38.8223	87.3935
														USMG5	15.8399	16.252	22.9628	75.8111	23.2998	19.8965	20.8169	80.922	35.8611	28.6847	20.7012	58.6639
														Electron Transport Chain
														COX8A	72.0642	95.8563	97.4057	255.749	139.87	195.219	114.533	257.554	125.423	155.549	132.842	333.962
														COX6A1	13.4663	16.7602	26.7629	68.1405	24.1548	42.3059	35.0981	60.503	32.3284	30.4159	29.3609	67.0611
														COX6B1	91.2488	100.311	107.011	224.423	132.325	121.198	82.4838	235.715	176.859	170.571	88.9168	199.109
														COX7A2	28.0937	42.9763	74.9917	105.108	34.0891	41.6729	56.6525	92.0062	57.2115	55.0023	41.7686	67.9719
														COX7B	35.5906	37.4296	81.6516	104.014	31.3946	36.8129	53.2219	130.355	27.3107	63.7411	83.1519	122.238
														NDUFA12	46.8388	47.8308	65.2176	131.092	59.3927	72.9641	79.8953	145.61	99.7323	89.0327	59.1295	118.166
														NDUFS6	32.6222	40.8535	85.3833	288.706	62.8798	96.6719	75.8209	278.632	63.7008	69.9597	83.4097	265.227
														NDUFA2	22.7293	35.6477	23.7543	61.4605	28.2946	45.5015	24.2258	59.9296	35.5337	35.4531	23.198	52.5819
														NDUFA6	22.6134	29.2989	38.6055	57.8636	29.2437	36.2735	35.844	65.7663	29.1644	39.4191	39.4825	60.2396
														NDUFA7	23.7993	22.1661	23.8027	96.8427	33.5774	35.0305	16.073	87.3683	35.4806	39.1784	22.4932	114.749
														NDUFAB1	10.4367	9.80359	27.0356	108.311	11.2307	17.9768	24.0031	97.5257	16.408	14.5257	30.6302	83.5687
														NDUFAF3	18.41	17.2062	28.894	100.417	22.2697	19.9012	21.9972	86.7241	22.343	17.8631	25.0919	96.6158
														NDUFB11	30.1316	37.6384	31.3471	54.1673	47.1634	54.8486	35.751	55.3209	45.515	53.8054	36.3759	54.0903
														NDUFB2	31.013	29.457	38.3052	83.3024	34.3827	60.7615	49.3311	98.6846	43.8706	44.26	55.6524	105.274
														NDUFS3	13.0575	17.0464	19.3899	64.3414	13.8865	19.0957	23.3193	52.6273	17.118	20.3144	15.8876	51.2486
														NDUFB10	39.0045	34.3463	20.7844	112.313	69.4995	90.394	29.7151	97.006	79.5918	78.4706	28.0698	113.938
														NDUFB7	31.1574	38.1614	19.3252	181.982	70.1224	111.799	31.1842	147.603	68.0812	89.4871	35.8326	174.538
														NDUFS7	27.5132	35.6744	22.1172	138.009	52.7349	85.1511	33.7867	118.025	55.6954	61.1025	26.6536	116.288
														NDUFS8	35.2994	40.6654	21.8909	116.757	52.5895	53.4176	22.9157	98.8427	47.8771	43.6671	17.443	114.802
														NDUFV1	34.7088	44.4016	22.7637	95.9546	54.8018	70.5429	30.559	76.3226	51.214	55.4015	29.2717	80.9023
														COX5A	26.7823	28.6804	31.8285	238.288	64.0747	75.6936	41.3081	254.395	57.4174	76.5425	43.9037	258.761
														CHCHD8	12.4684	11.6807	70.9605	87.1882	18.156	13.8927	42.8218	88.9461	13.1807	14.6821	50.4986	99.5258
														UQCRC2	45.9648	38.3338	56.0571	71.0962	40.1742	25.3953	45.998	65.5623	36.2956	35.5976	35.9929	50.6626
														C17orf89	10.5184	13.5569	27.7225	81.1681	15.4574	22.5795	23.5976	75.8188	13.478	11.5341	20.7148	79.2009
														CYC1	21.5487	23.6774	38.3121	184.923	26.4142	33.332	36.964	123.145	31.8125	27.6376	28.9041	135.227
														SDHB	19.93	22.6501	32.1781	77.2863	23.9883	20.5633	27.8542	73.3238	26.8618	29.8434	29.4864	72.7605
														UQCR11	25.7946	29.8453	20.0186	69.9876	42.6448	67.7706	33.0271	65.5285	41.1306	51.1141	25.1602	66.2212
														UQCRC1	24.4548	25.6685	24.6841	91.3919	38.1931	41.93	29.4675	88.0868	30.3401	34.2109	28.2675	93.0358
														UQCRH	40.7996	36.5572	44.2306	87.8758	37.0273	55.1239	37.4428	80.7196	40.1778	47.3361	45.0949	84.8901
														Amino Acid Transporters
														SLC3A2	32.087	60.713	428.756	448.148	59.0809	119.616	231.814	366.329	74.907	95.6432	192.984	313.195
														SLC7A5	2.23954	16.9063	1057.67	975.276	8.50093	59.9849	618.817	767.036	11.0067	82.3021	601.849	665.521
														SLC38A1	48.1559	34.3228	72.8515	71.9327	40.1958	30.2571	74.7407	74.798	39.7384	36.3531	67.4152	58.9702
														SLC38A5	6.50277	6.74232	4.93534	160.797	14.3951	14.1393	8.30483	186.562	15.7481	14.2467	10.0105	199.485
														SLC1A5	0.75974	6.39844	197.247	306.587	3.53404	15.3521	232.15	343.23	5.7208	25.5415	242.452	342.828
														SLC7A1	5.4469	5.26003	126.44	137.035	6.64225	6.32383	79.0277	113.374	5.49913	5.88783	80.2147	99.0496
														SLC38A5	6.50277	6.74232	4.93534	160.797	14.3951	14.1393	8.30483	186.562	15.7481	14.2467	10.0105	199.485
														Nucleotide Salvage Pathway
														APRT	48.4097	66.2328	72.9817	335.365	81.9239	102.43	60.2519	270.701	93.3839	99.9588	71.5423	253.141
														NAMPT	1.56456	6.3024	39.7418	99.295	1.70789	7.99509	43.4364	130.072	2.22427	12.9627	55.7474	111.865
														SLC43A3	2.91447	0	45.796	245.513	1.05934	0	21.6019	304.72	2.66224	1.63627	26.3815	255.818
														Nucleotide Metabolism
														NME2	34.2938	50.5411	55.7008	323.471	75.6067	107.359	75.3733	253.46	107.795	111.304	85.4447	217.883
														ERH	31.5747	35.5598	72.3973	183.81	39.9016	49.263	61.2318	190.025	39.1047	52.8049	67.6558	187.44
														IMPDH2	41.6052	49.2543	77.1795	331.131	43.0189	46.2834	56.2056	265.487	37.2698	48.4239	54.7776	235.525
														PNP	4.98513	11.0556	58.5518	64.5785	14.5768	22.6924	91.3222	77.6949	15.7438	27.9274	81.3843	71.0516
														DCTPP1	4.303	5.98682	57.5686	124.595	10.5527	7.00743	27.4549	112.441	12.2987	7.34834	22.879	89.9037
														ADSL	27.2603	21.0523	29.407	88.6247	30.0851	18.0518	27.271	87.4289	25.9561	19.7875	22.764	72.6993
														ATIC	19.9235	15.2897	23.8631	101.837	20.6084	11.4026	13.2917	87.7217	18.833	12.0476	13.2928	70.462
														CAD	8.7563	6.29931	10.6163	71.8255	10.2577	7.54505	7.63313	54.3011	9.95491	5.93592	7.79463	48.2741
														CD320	10.4374	13.2882	9.60958	112.951	20.478	25.2666	14.9743	102.585	26.996	23.1502	9.2723	137.98
														CTPS1	3.10318	5.28341	34.3762	66.7885	2.49775	3.95265	18.8272	60.2519	3.00822	5.7642	21.1619	49.0878
														FPGS	13.3356	14.9241	17.4509	59.7729	19.2585	23.4157	20.8034	56.0351	17.589	13.0236	16.3533	60.3922
														GART	7.26644	3.31754	27.8465	56.173	5.07831	2.01422	15.5533	59.5944	4.92796	2.31116	18.998	45.1994
														MTHFD1L	1.78244	3.08357	14.108	116.688	2.10699	2.06873	11.8513	80.0536	2.06281	5.29016	10.763	66.5652
														NME1	3.72252	3.96308	40.2399	217.844	3.01734	1.37221	23.0718	207.423	2.52145	4.5635	14.7745	153.081
														NME1-NME2	4.4151	1.64193	31.1205	147.638	8.61194	10.5925	20.2337	147.919	7.23687	6.48186	27.0853	140.65
														NME4	31.2513	33.3482	16.3185	101.07	48.1044	49.144	16.782	61.0971	47.0325	47.4858	14.6144	50.2937
														NT5C	10.7685	10.9981	7.94813	65.5403	16.0514	16.7084	8.82574	61.6427	14.6747	11.8109	8.86834	52.8109
														PAICS	6.00967	5.56688	35.3696	78.9092	4.63172	3.65689	13.6526	67.6573	5.20281	3.56331	14.8121	60.4217
														SLC29A1	0.294147	0	11.2813	104.846	0.512911	1.19453	4.13057	82.7458	0.885877	0	3.51345	71.2467
														Citric Acid Cycle
														CS	18.9623	19.0304	35.1794	70.0592	19.6334	20.2186	35.6086	70.4197	19.7188	22.8942	35.1396	64.6485
														ACO2	22.2149	21.9448	27.7619	64.1064	30.6852	27.7319	29.669	63.6487	25.1393	30.2884	25.7137	69.6165
														OGDH	20.9004	18.611	29.1822	59.9135	62.8653	53.0394	99.0125	60.0224	69.3489	60.651	111.561	66.4705
														IDH3B	44.8568	48.4885	38.6604	101.513	51.0653	57.8035	38.0097	93.5313	40.9677	45.4518	38.049	106.426
														GOT2	12.625	8.37909	21.7722	69.9496	16.8709	12.562	19.3166	61.5479	15.5765	12.4317	20.7313	59.8868
														SDHB	19.93	22.6501	32.1781	77.2863	23.9883	20.5633	27.8542	73.3238	26.8618	29.8434	29.4864	72.7605
														Transcription
														HIF1A	35.8444	56.7101	166.052	71.4397	20.5665	22.6151	101.356	97.5481	15.306	28.4645	74.2438	75.1179
														SREBF2	19.9546	21.363	69.315	128.202	32.8212	38.2756	66.7779	127.663	32.5588	34.3554	62.8058	145.873
														MYC	82.7827	162.241	1433.16	540.053	87.8758	90.1153	956.899	475.651	81.3465	140.153	968.945	498.663
														Fe/S regulation
														FAM96B	28.0678	42.4236	146.917	263.668	53.9797	73.9886	124.776	280.296	57.22	62.0794	125.812	270.405
														TFRC	6.37327	11.8718	51.0808	69.1862	2.82537	9.79351	45.4896	70.0697	7.70286	10.5038	48.9473	43.1986
														GLRX5	9.98999	14.3389	14.9563	54.0993	18.3381	30.1601	21.9188	57.0556	20.6256	21.9746	19.5169	50.1598
														NUBP2	15.6181	20.6905	15.9584	62.523	28.5471	40.5415	22.8936	50.4313	30.3109	29.8516	18.5416	56.3796
														One Carbon Metabolism
														MTHFD2	3.38492	7.17056	110.043	196.305	4.03337	5.99826	67.1269	173.703	5.3047	8.87362	66.9369	144.014
														AHCY	7.89437	9.28973	14.2251	94.7802	7.91848	7.20813	10.3619	75.1369	7.01004	8.2131	11.2173	58.7542
														DCTPP1	4.303	5.98682	57.5686	124.595	10.5527	7.00743	27.4549	112.441	12.2987	7.34834	22.879	89.9037
														SFXN1	14.2812	22.7145	64.2227	128.11	13.0233	17.1288	46.9002	90.2079	14.0052	17.4851	45.2093	63.623
														CD320	10.4374	13.2882	9.60958	112.951	20.478	25.2666	14.9743	102.585	26.996	23.1502	9.2723	137.98
														FPGS	13.3356	14.9241	17.4509	59.7729	19.2585	23.4157	20.8034	56.0351	17.589	13.0236	16.3533	60.3922
														MTHFD1L	1.78244	3.08357	14.108	116.688	2.10699	2.06873	11.8513	80.0536	2.06281	5.29016	10.763	66.5652
														SHMT2	16.6293	14.4532	29.2504	354.604	20.1641	25.9978	17.3228	262.951	18.4662	16.8109	16.9303	257.668
														Cholesterol/FA Anabolism
														SREBF2	19.9546	21.363	69.315	128.202	32.8212	38.2756	66.7779	127.663	32.5588	34.3554	62.8058	145.873
														FASN	10.2272	20.1534	56.885	255.581	19.0318	32.142	44.0322	206.328	15.8396	22.3804	25.4446	188.141
														PTGES3	30.8074	35.7769	53.062	124.978	42.9193	32.9972	42.7083	139.733	38.4081	47.3591	47.351	135.606
														ELOVL5	27.7242	21.5015	44.2541	55.6884	39.2412	38.9075	64.4443	65.2746	40.8257	40.2589	82.748	61.1799
														ACOT7	2.3679	2.02443	2.01513	59.4373	2.83222	5.11632	4.7159	50.151	3.10331	4.19515	5.35122	52.6286
														CERS2	25.4317	27.5303	32.2168	73.1541	43.4475	39.3417	46.712	81.9689	52.5529	42.0621	43.9014	77.3119
														CYB5R3	14.2606	21.3999	36.8453	53.3574	31.1095	39.5313	39.9053	58.0474	32.8839	44.0318	45.7882	66.4348
														DBI	33.448	28.4183	24.4223	79.3394	45.7395	55.7946	21.1699	117.837	37.6775	55.1723	36.9756	140.486
														DHCR24	1.60497	1.26708	1.07959	65.5784	1.32053	1.27163	1.00797	54.653	1.36478	1.48272	0.848321	51.6712
														FDFT1	28.7125	22.2871	14.1477	81.5363	34.8579	24.5338	18.7036	84.2947	36.9141	30.9173	14.6337	75.5601
														HSD17B10	12.6256	14.9512	25.4307	107.225	21.831	26.6364	23.1272	85.4225	29.0918	23.6278	17.8725	85.6951
														MID1IP1	7.30329	10.2632	34.4108	56.4135	17.4834	36.4894	34.1585	62.8376	23.6631	41.7329	31.9217	52.1839
														TALDO1	28.2671	24.8767	14.2291	186.197	45.9351	42.6196	16.1513	138.953	44.1749	41.4872	17.272	129.949
														FDPS	13.1532	13.1568	11.6334	56.4918	18.79	17.9341	12.4002	48.0312	16.3547	18.0896	9.57944	55.2747
														Mitochondrial Ribosomes
														GADD45GIP1	28.1075	37.9628	74.7313	257.266	56.459	64.2584	83.2841	219.522	45.2048	58.8899	70.8399	219.415
														TUFM	35.5425	40.6985	75.5465	322.062	60.5252	73.1609	70.0968	266.519	54.4847	60.8424	77.582	272.041
														MRPL20	36.1522	35.6105	76.6771	152.461	33.9176	45.1921	61.6608	160.739	36.836	32.0734	65.2152	146.033
														MRPL12	9.09046	17.4162	44.2665	238.948	12.1363	21.2639	34.1758	200	12.2696	17.8593	41.6214	205.494
														MRPL21	14.4939	17.5254	25.2099	68.1475	16.8256	18.6216	18.8417	63.2955	12.6253	16.7591	20.5812	55.6726
														MRPL23	16.5986	28.1557	25.8765	152.259	28.4919	50.8296	25.3443	110.341	29.499	41.1381	26.6008	98.5468
														MRPL24	15.2941	10.9733	15.2058	76.3018	20.7761	16.5708	12.4334	74.879	24.1701	20.5852	15.7291	76.2296
														MRPL27	5.03903	12.8488	17.6544	56.5361	4.49904	13.9551	17.8938	51.7356	5.90501	12.0036	15.2697	45.6126
														MRPL28	10.6952	12.0066	25.2257	115.475	18.5447	25.8169	19.9513	96.1325	21.8486	24.5826	25.8189	104.888
														MRPL3	13.1466	11.8747	30.3248	95.7884	10.8523	8.52756	19.9528	102	11.0177	10.2762	21.2988	86.3022
														MRPL34	22.9785	18.8915	12.2406	76.333	35.7692	42.1154	15.4892	73.8208	33.333	35.408	16.813	81.1115
														MRPL37	14.8877	14.6105	31.4343	84.3989	18.2965	15.1416	22.5339	73.6822	17.9404	17.2812	21.1315	64.6644
														MRPL38	21.1317	25.966	26.4132	73.9618	32.553	36.8193	30.8987	65.5125	25.758	27.9795	29.461	70.9716
														MRPL4	18.8427	22.4319	47.707	265.88	31.5489	35.5943	36.2131	221.995	31.9989	29.7037	37.3988	223.323
														MRPL52	7.8736	10.016	19.8746	73.4407	9.89056	17.2625	14.738	61.2149	15.2991	12.8627	14.2256	63.4706
														MRPL54	21.8849	49.6335	49.4912	61.505	40.3469	63.3381	39.5672	69.6948	44.5228	56.5209	34.4609	44.2544
														MRPL9	30.2078	35.0381	24.5455	51.7094	30.2023	31.604	25.698	52.179	32.3249	29.7538	25.3286	59.1472
														MRPS12	7.30657	8.59778	36.6237	95.1864	13.5444	17.0285	30.3406	94.3482	12.4109	13.0251	30.8109	99.5838
														MRPS15	17.8851	19.8691	22.0477	83.7381	22.4253	26.6581	21.0676	79.5293	21.9	23.2109	22.7861	63.0413
														MRPS2	13.4908	15.6377	34.1746	79.4343	23.9628	18.2203	26.4974	74.0667	20.2338	20.5713	35.0443	81.5551
														MRPS24	31.7082	47.9307	47.2494	161.821	46.6386	84.9861	49.1082	136.965	52.3234	58.8217	37.5526	148.547
														MRPS26	15.1047	15.1472	20.6023	140.543	22.7507	24.5496	22.5022	103.627	19.6138	15.6419	19.9967	107.296
														MRPS34	24.8872	22.9285	15.6506	199.225	46.9685	55.8607	19.2559	155.748	58.5077	45.0785	15.5358	155.666
														MRPS7	9.45033	12.9739	40.7981	71.9324	10.145	12.6887	33.6793	71.018	11.1347	13.7902	30.3959	67.4024
														MRPL51	15.7585	20.1361	53.7197	154.553	26.3097	27.6939	29.8422	137.265	36.2333	25.6985	32.9909	104.467
														MRPL32	13.7612	16.8979	51.7765	57.358	14.1831	13.9311	35.7545	50.2935	10.7884	11.6793	42.5082	48.7147
														MRPL41	39.6226	46.6992	44.8907	129.97	66.1448	92.4012	58.9038	116.187	79.3506	73.1323	50.7375	135.947
														LONP1	19.053	21.1436	55.1288	273.864	24.9349	30.7637	46.8882	205.233	28.0824	23.709	37.0653	191.791
														DAP3	35.1322	31.5193	36.1511	56.828	35.3202	22.8947	27.3815	63.3924	33.1459	32.8783	28.4277	68.4049
														Acetyl-coA
														ACLY	19.8713	12.9971	23.0126	95.7678	28.9089	23.7872	28.3117	98.2361	32.7255	21.4423	28.8753	94.1069
														APEH	20.6852	17.5207	7.29096	50.1988	24.6256	22.2119	7.97028	52.5162	23.3984	18.8867	6.40323	49.9827
														Mitochondria Translocases
														TOMM5	15.7969	19.1727	90.3594	156.778	30.6173	26.8851	57.4233	159.449	32.1226	38.0362	63.1029	126.201
														TOMM6	49.2943	43.6054	84.7664	138.205	46.3917	43.6529	53.8608	156.844	37.7826	47.2099	56.1584	145.278
														TIMM10	6.84482	9.94842	42.2175	103.928	8.89127	10.9975	31.1061	82.4876	7.27892	7.88298	28.0001	68.9173
														TIMM13	7.42219	10.1261	29.7121	111.582	9.35519	15.4638	26.529	95.5913	11.5163	12.313	24.1738	87.7473
														TIMM44	7.59976	11.8311	43.3954	87.7791	10.404	12.9715	26.4928	63.5276	9.24591	14.2725	25.6245	52.5937
														TIMM50	6.29398	6.70067	19.9911	64.7144	7.443	10.6801	15.6113	52.6387	9.09713	8.46556	15.4155	47.8881
														TOMM22	16.3092	21.057	46.8817	136.783	26.6778	27.508	38.6075	117.929	21.7564	35.3559	37.4149	109.093
														TOMM40	6.43687	10.5475	39.7561	175.491	11.0209	16.7173	32.202	137.778	14.9067	14.5236	27.3752	117.567
														VDAC1	2.63138	5.11236	15.4401	61.3736	5.89504	6.65726	17.0962	64.8626	8.30903	9.51012	18.4998	57.8616
														Mitochondrial Biogenesis
														SSBP1	26.3669	28.3685	53.9391	104.39	25.4753	17.0829	38.9644	99.9081	29.6308	23.4335	35.9277	95.8263
														CHCHD10	35.3616	49.7252	34.7469	171.772	76.642	79.276	35.7716	98.1999	79.1289	81.2658	35.0338	99.7466
														FIS1	38.1812	47.5416	24.4601	84.3872	52.0342	82.8965	32.3248	68.728	66.1316	59.4906	28.3487	81.915
														C19orf70	13.1284	18.2254	17.5859	80.6365	23.1201	43.586	25.5472	69.9631	22.8527	31.4284	24.1463	81.5793
														MNF1	10.7455	12.5944	26.0661	80.0661	13.4882	17.2339	20.8425	91.1929	21.2558	15.4416	27.7158	83.5074
														MTFP1	13.7302	32.9967	20.2343	70.5308	26.1799	43.1569	19.9826	67.07	25.6893	39.698	15.5749	57.4488
														PPIF	6.01016	11.1082	39.3914	97.1664	8.70155	24.0801	47.0714	95.914	9.52037	24.5768	46.3538	86.4983
														PRELID1	7.55904	10.5711	14.864	71.2138	9.95814	21.3517	19.0206	78.3523	18.0721	12.0229	20.8908	72.6588
														STARD7	12.557	15.8301	40.0533	69.0697	16.3525	19.8122	40.309	64.9747	16.6759	17.6898	33.9722	59.9876
														STOML2	13.6766	13.2788	16.9319	119.766	18.5105	20.4864	18.4078	108.027	16.9926	13.2977	14.3717	97.6245
														Mitochondria-Mediated Apoptosis
														BAX	32.68	38.4395	19.3776	107.021	57.8921	78.101	22.5451	105.914	88.6557	72.8279	22.1948	105.557
														BCL2L1	4.64335	4.09244	28.2377	147.591	13.3987	10.5624	36.1593	164.133	16.8658	10.2987	82.9311	171.268
														Potassium Channel
														KCNAB2	37.188	33.5892	15.7688	72.5631	60.253	59.6135	29.2274	74.6414	63.0667	60.8697	27.7428	81.0468
														LKB1 Signaling
														CAB39	32.6705	19.8791	16.0974	59.152	35.9049	28.8091	29.3686	63.2126	36.6112	22.6795	23.421	66.3979
														MTOR Signaling
														LAMTOR1	29.2076	31.5382	19.623	64.0689	39.9571	48.2615	24.7877	70.258	41.2914	37.9074	23.4963	77.0168
														Proline Biosynthesis
														PYCR1	0.379042	0.539389	30.5897	140.913	0.242051	0	3.71673	76.7801	0	0	2.35271	67.4268
														PYCR2	27.5175	19.7374	26.1559	160.895	30.0875	22.7924	19.2885	119.148	26.9719	18.8298	18.4081	108.862
														Glycine Biosynthesis
														SHMT2	16.6293	14.4532	29.2504	354.604	20.1641	25.9978	17.3228	262.951	18.4662	16.8109	16.9303	257.668
														Other
														CHCHD2	24.6136	41.8844	63.3008	138.217	38.6034	60.7215	67.8193	130.339	42.3689	57.7778	63.7319	125.387
														MT2A	13.2716	20.6319	97.5313	257.58	25.0293	44.2262	53.0696	198.842	18.0136	33.3174	79.751	125.88
														GRPEL1	13.4748	29.7341	81.3126	62.9263	14.942	24.2071	56.0973	68.8183	17.3135	27.2223	59.6314	58.9794
														PPRC1	9.34478	13.1946	108.329	86.0364	11.6631	15.5604	69.9351	67.2339	12.266	15.379	72.2977	65.7408
														GHITM	27.7523	32.3576	56.7876	85.718	28.4804	28.0412	45.2947	76.9374	27.0441	24.3326	41.4287	67.9142
														KIAA0664	8.82329	10.6396	63.1773	156.976	12.5549	16.1086	46.0679	124.828	15.3511	14.538	45.472	122.017
														SLC25A39	34.5273	44.2676	35.2881	213.029	58.3387	67.8076	29.7383	170.102	55.3223	58.1862	27.7914	150.031
														ABCF2	9.76821	6.9218	44.3756	80.3776	15.9535	11.6267	29.8002	75.0731	13.4145	10.7721	26.1702	62.8152
														ADIPOR1	16.6805	26.3111	40.3208	55.628	25.3639	26.627	33.7197	58.4894	25.3254	30.2489	31.8412	50.9792
														AKR1A1	13.2466	12.2236	27.1326	75.5566	14.6498	18.5125	16.7148	76.2273	14.9842	15.5564	19.4659	71.8213
														APOA1BP	14.8817	19.7735	17.5522	88.6372	24.5019	28.7826	17.6824	72.4639	23.2288	24.6275	16.0628	63.3577
														C6orf108	16.8141	27.4883	28.6131	64.9262	28.8589	53.3231	30.4123	65.2843	33.0168	31.1101	25.4927	77.0336
														JMJD8	16.6441	16.745	17.6188	72.523	24.9078	30.4379	16.0121	64.2367	28.9753	27.2767	17.0836	74.5369
														MALSU1	11.2389	15.9273	26.0037	66.6026	12.347	18.769	17.5028	57.5097	10.4968	12.1427	16.2819	52.7912
														MT1X	7.44295	8.09281	5.88718	65.2233	9.88897	14.0303	3.45966	55.5221	7.94001	9.02541	8.14264	44.5068
														PAM16	3.31502	2.84853	20.5208	81.961	5.84727	14.8549	9.86742	79.5246	5.46559	13.7345	8.64234	70.5079
														PGAM5	5.83351	5.98991	46.0046	76.1281	10.2163	11.1641	34.4521	60.5111	11.9767	9.75702	34.4193	57.8838
														PPA1	19.1719	15.535	39.4909	119.153	15.3423	15.907	32.9858	114.69	16.8113	15.9229	38.1649	96.6707
														TBRG4	17.7525	14.9103	34.6743	64.7453	16.3424	10.8538	22.4342	58.8773	15.7008	9.96762	26.475	50.6114
														YDJC	13.7612	18.4717	32.6754	67.2869	22.2699	24.2775	37.7013	59.7535	22.9871	22.8135	33.256	56.4418
														CBR1	6.34477	5.12777	15.198	53.5671	11.0976	8.40506	11.2265	48.0018	6.97173	6.94802	11.9596	58.2743

## Sheet: TRANSCRIPTION
DOWNREGULATED FOLLOWING ACTIVATION														UPREGULATED FOLLOWING ACTIVATION
	NAÏVE CD4+ T CELLS				CENTRAL MEMORY CD4+ T CELLS				TRANSITIONAL MEMORY CD4+ T CELLS						NAÏVE CD4+ T CELLS				CENTRAL MEMORY CD4+ T CELLS				TRANSITIONAL MEMORY CD4+ T CELLS
GENE	0H	40MIN	150MIN	15HR	0H	40MIN	150MIN	15HR	0H	40MIN	150MIN	15HR		GENE	0H	40MIN	150MIN	15HR	0H	40MIN	150MIN	15HR	0H	40MIN	150MIN	15HR
RNA-dependent ATPase
DDX5	349.637	368.344	403.876	180.038	272.702	252.923	341.44	190.867	243.859	262.9	324.767	186.632		ACIN1	12.9676	16.1011	31.4875	78.6857	29.6318	37.3294	21.0931	64.3617	38.3616	28.1102	22.0594	68.5787
														ANKRD11	41.7033	39.0259	42.0723	98.5319	47.3545	55.622	46.913	69.0397	42.0801	44.3677	41.7124	74.2416
Other														BATF3	0.0839778	0.169465	7.00897	77.5599	0.509065	1.11116	23.0554	126.903	0.961733	0.955771	50.4766	168.932
CIRBP	208.708	291.806	136.853	184.717	253.814	392.498	152.243	164.852	337.86	330.615	138.143	152.676		BRMS1	18.1108	23.7919	22.6603	67.883	26.9835	44.3399	27.0373	67.7322	33.9473	36.1463	28.3286	75.3461
HNRNPH1	115.677	81.973	62.5319	2.34806	54.0231	0	47.1896	41.0561	46.6775	0.725817	4.64203	27.6249		CIZ1	47.0354	48.4208	20.4334	84.0288	64.2471	72.7452	22.6286	74.7107	66.8872	66.8196	20.7015	88.7747
YPEL3	84.3929	93.9676	32.1398	1.96216	142.071	166.803	44.3847	3.58813	122.28	141.66	34.6568	6.00007		CPSF1	34.6627	31.4583	20.3281	79.0407	50.719	49.6026	23.9909	62.4893	50.2044	39.318	20.4287	68.7182
RBL2	93.8315	58.9014	16.5436	7.64381	63.7208	37.5183	18.8979	8.03828	58.9513	40.4922	14.6435	6.70561		CPSF3L	32.6957	34.427	36.2235	107.023	43.6913	52.5688	35.7332	98.9929	41.9776	39.3075	37.5924	90.1393
														DDX18	17.9753	16.5142	54.1096	54.1527	13.2641	8.62771	30.8463	50.726	10.3242	9.32492	25.4304	40.992
Splicing														DHX15	24.6874	29.0769	71.0694	81.2793	18.4408	18.077	60.4343	82.1032	16.4597	16.9313	51.5108	65.005
SRRM2	211.966	249.327	202.367	191.283	226.848	232.385	178.05	171.3	208.7	228.249	165.692	181.464		DHX30	16.0116	21.0639	41.6778	94.5293	18.6129	23.7105	39.0764	88.8322	18.5822	19.0919	32.5337	79.6794
CLK1	99.2881	155.218	67.4375	14.2177	65.6637	87.2274	69.8641	18.6572	51.5455	105.344	67.3015	19.5027		DHX38	20.5031	20.9642	32.1272	53.6391	23.6578	27.3123	32.1511	51.8002	22.7498	25.6588	28.9789	51.9426
SRSF11	84.4794	66.2074	52.0457	48.0136	55.5378	43.6954	56.6449	47.576	45.397	38.2313	47.1903	42.4966		DHX9	31.4364	48.9288	65.4363	92.1126	25.227	32.7575	55.3919	90.9731	21.2316	40.3345	51.2168	76.34
SRSF5	55.0837	61.9046	61.6576	8.55223	50.364	34.8728	59.295	13.3351	29.9582	55.6999	55.8821	5.8549		E2F4	31.2464	31.6394	62.745	172.374	47.2442	49.1039	62.7453	156.788	51.8454	48.3688	65.9574	142.99
PNISR	100.937	66.5458	58.7234	32.1422	67.0276	40.6086	42.4066	28.051	45.9847	37.0652	37.519	28.4614		ELOF1	14.1077	15.4989	29.6215	54.7347	21.727	33.8032	25.5624	53.4594	36.2941	33.3291	22.7679	47.9369
														FOSL1	0.172864	17.0432	135.876	139.676	0.299396	12.678	65.9696	112.193	0.565624	16.2389	70.8953	113.907
Transcription Factors														FUBP1	35.0067	42.8872	159.661	129.513	28.3982	32.656	96.7959	127.777	22.4415	32.6914	93.2929	112.847
ZFP36L2	384.785	476.634	69.6729	54.376	1193.42	1218.68	172.721	70.1102	1343.89	1255.99	132.022	93.807		GTF2F1	30.6955	43.4676	42.5321	71.4017	43.068	75.5468	47.6178	64.5029	45.6382	63.4631	39.0935	73.422
ETS1	375.387	187.58	93.4655	48.2704	313.705	176.368	114.499	81.8183	301.546	164.617	82.6032	82.6638		HCFC1	24.9122	28.6481	24.9939	99.1208	33.5062	39.6897	23.8414	83.4191	29.1794	37.2898	19.6645	88.0614
KLF6	58.5184	143.504	69.8836	18.0562	170.262	377.787	301.829	39.113	200.792	479.371	390.762	43.0129		HIVEP3	1.59331	2.40349	22.1248	83.6512	4.79515	5.36807	14.0785	83.8088	4.60126	5.75897	24.1585	78.4466
AKNA	71.5084	74.5775	31.4534	31.8239	97.7863	104.797	54.1093	32.2916	103.125	92.2132	40.617	37.262		HNRNPC	25.4967	20.0787	55.6843	66.0492	22.5324	18.5179	41.2142	70.8445	23.5697	22.2387	52.7093	58.7636
KLF13	50.2168	59.8077	23.1292	21.5226	75.4231	90.0569	57.8701	27.0726	83.8015	93.0104	52.3489	28.6899		HNRNPF	12.4596	4.114	20.9246	60.6567	8.64759	9.94732	14.37	82.6494	4.79143	6.03064	39.382	83.6499
TSC22D3	399.352	656.929	42.0094	8.45632	664.214	1039.2	74.8892	5.61957	686.764	1005.24	40.7346	7.89082		HNRNPF	10.3276	5.28808	48.7619	59.648	9.59726	6.20237	36.0299	63.0241	13.0185	8.15005	42.8028	55.3425
														HNRNPK	35.7874	43.0032	85.4144	87.9642	32.5703	44.377	63.955	85.2173	30.9166	40.123	67.8623	92.291
WNT/B-Catenin Signaling														HNRNPK	25.3488	28.8001	58.164	67.6398	29.9245	26.076	48.3228	77.5761	31.6012	28.7497	48.0783	60.825
TCF7	365.135	338.424	134.915	55.7004	353.665	316.706	168.589	19.0639	289.021	225.179	115.569	6.4261		HNRNPR	43.8663	32.3202	67.3903	103.535	38.7153	31.1152	47.1714	103.993	31.6223	35.5994	51.0693	103.657
TCF7	113.202	94.07	23.0462	0.935474	68.633	34.3149	8.80301	0.367706	46.2194	30.4633	7.35784	0		HNRNPUL2	44.5804	33.0868	31.1141	99.0177	71.0546	72.0473	40.1863	91.7792	78.5103	62.3179	34.5796	94.0701
LEF1	77.5594	45.7787	13.6088	19.6906	36.4136	20.5971	5.81294	6.63476	16.2959	14.8882	3.14395	4.344		ID2	26.8467	25.3512	11.5719	68.6606	49.3047	58.9775	51.8875	192.289	52.0148	92.5697	127.315	234.207
BCL9L	72.8083	84.9069	41.1453	13.3727	97.1742	118.192	56.5116	10.8425	99.7472	114.464	41.8828	13.0449		KHDRBS1	39.028	41.484	62.2005	76.957	45.1965	54.2384	65.1646	72.7409	47.0149	49.9361	61.5173	70.2042
														KHSRP	25.3716	29.9754	73.4141	233.841	40.0975	45.0775	57.3547	181.321	41.5123	47.1851	54.3388	162.38
AP-1 Transcription Factor														LSM10	14.1019	12.9737	20.5536	66.3922	21.9341	24.6222	20.7787	64.2768	17.5373	18.6297	19.7581	60.641
FOS	286.391	1699.66	143.399	2.18771	1244.39	2268.28	279.917	2.3016	1214.87	1764.24	160.141	2.49964		LSM6	15.1784	17.5329	28.9576	65.7081	16.4984	15.7897	15.4995	77.9728	19.1809	18.7972	14.0799	62.0682
JUN	237.342	688.646	61.8144	14.1412	834.526	1447.4	126.414	7.28058	928.413	1306.36	88.6793	5.50118		LUC7L2	22.9386	29.4963	59.0352	79.6516	26.5767	40.1112	51.0595	71.5709	28.468	33.4058	47.7861	66.0582
														MAGOH	28.278	37.8231	91.4646	134.627	30.3864	49.0232	59.8343	158.949	32.9462	50.2981	78.3244	132.398
Quiescence Transcription Factor														MED16	22.4833	19.8236	14.5083	60.0404	36.1508	32.6566	22.5969	52.1101	35.5572	24.7265	13.5597	58.419
KLF2	302.726	984.367	110.142	0.599232	650.816	1220.4	204.967	0.971624	509.549	1256.02	101.426	4.54335		NCBP2	15.7004	16.128	63.3419	62.6304	11.1663	12.6147	38.0266	65.6397	12.9332	11.5626	42.2323	59.1398
														NFKB2	2.95319	15.8213	109.871	60.3633	1.53983	31.4005	90.2191	78.0621	10.8181	15.8034	94.6504	103.924
Nuclear Receptors														NHP2L1	33.1371	46.3289	96.0714	162.625	43.1124	53.6254	73.4951	145.472	39.6343	55.5563	68.0268	156.864
PNRC1	153.236	323.788	70.2487	11.6844	159.285	302.739	88.6409	13.8212	123.052	272.096	88.3955	14.7521		PABPN1	29.4021	35.3766	47.1474	108.199	46.4496	57.8043	52.8408	83.8292	62.1061	51.4391	47.331	74.9679
PBXIP1	124.862	170.511	116.702	6.32097	264.228	353.412	228.604	10.8284	315.746	341.842	180.072	15.8466		PELP1	14.1345	14.834	41.5781	89.15	17.2962	18.4241	26.4828	70.1016	19.7342	15.879	21.1588	58.8243
BCL9L	72.8083	84.9069	41.1453	13.3727	97.1742	118.192	56.5116	10.8425	99.7472	114.464	41.8828	13.0449		POU2F2	14.8469	13.441	140.092	76.6858	25.6939	15.4343	68.5217	76.3896	20.0686	17.5633	74.0694	73.0735
RARRES3	51.96	51.8657	22.3851	4.73615	60.2753	48.4464	32.3888	5.23598	56.9776	59.2391	32.817	8.61822		PPAN,PPAN-P2RY11	20.3193	28.3176	136.96	285.917	25.0311	39.1779	99.6046	265.641	26.4573	29.2604	101.896	240.564
														PPM1G	27.5025	21.7617	37.7775	126.629	39.3382	42.901	49.1807	123.193	35.0826	33.8514	51.8211	115.992
IFN/STAT Pathway														PRPF19	34.6956	31.6388	102.418	216.629	38.3437	37.4528	71.0797	170.834	40.4801	32.0106	59.1186	171.739
JAK1	92.6005	68.3231	80.5487	31.3972	86.576	54.362	84.0387	40.0156	72.706	58.8004	67.2611	43.5908		PRPF31	20.4188	22.6605	26.5571	107.326	28.3191	33.4944	26.7035	104.975	32.5061	30.0034	25.3328	89.235
IRF3	72.698	54.1386	19.3537	40.7431	90.3939	75.4088	19.5553	41.6376	92.8463	58.9079	14.1235	44.5636		PRPF6	33.6728	36.5265	37.9309	69.0762	42.8373	45.6968	42.4912	61.0193	41.4989	41.759	34.3931	61.7527
														PUF60	29.3728	35.2409	86.4649	198.587	43.5915	48.5752	83.2143	167.974	43.6234	43.5216	78.4861	157.131
														RBM25	43.5173	34.8357	63.2832	76.7757	39.6141	39.8729	45.0319	63.5224	36.0896	36.1709	41.8863	64.9084
														RBM3	34.8898	46.3127	75.7649	62.7988	33.0149	42.2048	54.2716	58.203	37.4234	43.6038	50.6679	55.7841
														RDBP	15.6353	21.3437	57.0002	72.2053	22.2985	23.0657	44.6367	65.9767	23.8334	24.5572	43.6474	70.3027
														RELB	6.59058	18.0739	184.096	110.516	17.3416	39.0979	167.892	96.9072	17.2518	37.7334	124.812	95.2387
														RNH1	19.2666	35.6722	72.2887	133.281	39.5684	67.7064	76.6969	107.204	49.3813	55.8619	63.808	127.274
														RNPS1	15.1693	19.7132	57.3186	63.1888	17.3322	13.13	33.3565	62.7624	23.6641	26.6949	35.258	51.8127
														SART1	30.084	35.5174	51.0978	108.786	47.0131	72.5284	52.9286	95.9279	47.0027	57.8033	47.9364	98.2009
														SF1	14.4057	30.0167	29.4424	81.5624	21.3516	36.1017	30.9679	59.4666	21.922	24.7858	30.7943	50.5236
														SF3B14	21.5305	27.0248	44.8706	65.3629	24.1816	30.2555	36.9161	83.1237	25.2079	31.7537	41.7688	73.8509
														SF3B4	20.5852	24.1069	53.4204	112.878	34.4956	31.1754	50.4303	107.323	34.2732	37.218	48.3884	128.864
														SLIRP	13.3964	14.5113	31.8177	59.4176	14.4406	11.1345	20.3461	69.4331	9.71389	12.2882	26.4604	52.2384
														SMG5	15.5448	16.7351	29.8908	57.122	17.1462	20.9266	31.216	50.2117	17.4095	17.854	27.9647	47.221
														SND1	21.6993	24.3903	15.4337	145.566	42.4228	51.6435	28.1076	149.442	54.1118	52.7132	24.0854	143.091
														SNRNP200	39.234	40.1087	54.1524	91.9526	38.6703	36.5412	51.4486	80.6986	32.8819	33.5526	40.0048	75.0962
														SNRPA	44.099	40.8215	43.1378	190.806	50.6853	46.7067	27.9244	168.778	52.9357	62.3539	38.6877	162.625
														SNRPC	20.8832	21.5376	28.3911	92.8317	20.3804	16.1219	16.496	95.1843	15.9693	20.8014	24.6119	112.779
														SNRPD3	23.7927	17.9649	37.0931	103.53	22.2353	21.25	27.7063	107.238	21.1172	21.6632	42.0032	104.509
														SNRPF	20.6215	22.4316	50.3332	137.621	26.6595	26.6669	44.3842	152.139	29.9813	31.3982	41.0466	132.267
														SNRPG	4.33965	8.51805	28.904	56.3185	5.75007	13.1784	20.4092	55.0673	9.77679	13.1348	17.3437	46.0647
														SRF	10.4361	15.0666	61.8816	88.8409	18.1191	27.7686	34.1642	77.1049	23.51	24.2715	25.7422	77.3836
														SRSF1	25.2439	21.0636	58.3626	104.655	15.0181	19.5803	41.7433	106.367	14.4122	17.3954	43.3576	80.7671
														SRSF4	32.0412	33.271	39.8597	98.7265	40.0041	46.7901	45.6526	80.4904	44.3762	40.2304	43.2503	84.0997
														STRA13	11.0595	14.4231	11.6107	71.29	15.0502	20.3077	7.31052	68.478	17.0598	18.6951	6.16657	65.2726
														STRAP	16.4765	42.7904	66.5345	112.098	26.0401	36.5065	58.8296	100.758	21.395	36.9685	52.714	92.9713
														SUPT6H	31.6871	29.5887	75.311	81.1161	32.7151	31.7536	54.5702	72.8178	32.0748	32.1205	52.0564	71.1336
														SYNCRIP	18.2479	23.2573	74.4191	135.943	23.3024	31.6477	59.2678	120.349	32.1115	28.2807	49.0184	96.7622
														TAF9	18.7827	21.4633	67.5356	68.8477	11.1844	7.72952	34.9175	63.659	4.14895	10.0125	31.6369	35.7401
														TCEB2	35.4448	41.1337	31.6156	120.119	50.3323	75.2822	46.3792	115.611	63.2561	66.1573	41.8946	104.432
														TCERG1	17.6175	19.4102	37.7064	53.0341	15.6683	15.7763	25.1482	50.7028	13.2508	14.818	22.1754	47.3575
														TH1L	23.178	19.8876	37.9559	56.8664	23.3065	18.9321	28.3177	58.8494	19.3959	17.0324	23.3971	51.6505
														TLE3	13.2823	17.2608	75.8529	63.5446	17.6663	28.7684	73.1931	54.4506	16.2745	27.6465	60.2706	65.475
														UPF1	18.1796	27.8061	53.3168	75.2834	23.2334	37.2797	58.1237	67.8054	23.2644	32.0431	50.0465	62.6271
														WBP11	28.4672	46.7527	45.3626	66.3929	31.749	37.5849	36.9217	65.1908	31.9662	48.8169	33.5399	57.3806
														YY1	29.2247	26.3607	39.9073	73.8728	43.3501	52.736	55.5414	60.7628	42.8051	39.2681	40.1451	57.346
														ZMAT2	23.8647	24.3358	41.6138	57.2925	27.0835	28.1162	40.6739	63.3678	39.0613	30.799	36.643	69.9648
														ZNF593	3.74465	9.47779	58.7692	133.815	10.5162	14.1084	46.9882	143.927	11.6297	12.3602	53.6222	150.07
														Transcription Factors
														MYC	82.7827	162.241	1433.16	540.053	87.8758	90.1153	956.899	475.651	81.3465	140.153	968.945	498.663
														SUPT5H	37.2511	48.038	77.9926	108.827	48.2534	67.8399	81.1581	104.768	75.1902	84.5522	72.1027	77.4864
														NFKBIB	8.87047	30.7002	77.1402	149.295	21.6476	64.8816	78.1026	144.581	25.6933	65.8895	69.0702	148.308
														IRF4	3.48847	17.1368	346.814	451.993	1.08323	5.71701	409.36	428.419	0.873412	12.2066	452.947	510.917
														IRF8	1.60987	4.06087	127.262	302.187	0.375343	0.98313	20.9147	83.0307	0.212731	1.01791	19.6497	38.2905
														TBX21	0.800761	1.24964	27.4899	110.988	7.96078	9.49339	135.808	98.861	9.24386	12.0705	161.964	105.564
														STAT1	35.9484	22.1986	15.3871	124.182	34.9799	18.8229	26.5755	113.97	36.5488	20.3464	30.565	113.327
														STAT3	19.9656	36.4675	73.3431	64.1664	29.7014	33.0764	56.2668	50.5063	20.5657	27.0339	50.4055	50.4058
														BATF	12.1821	12.0263	99.1852	262.684	26.2093	35.9483	221.28	336.123	40.348	49.0971	357.144	438.679
														ATF4	73.2187	151.329	359.097	330.552	118.243	231.163	322.404	342.946	125.253	189.993	369.888	348.967
														Other
														FUS	57.5673	91.3845	211.917	329.172	66.8112	131.113	203.569	287.21	72.4599	108.186	187.957	262.847
														EWSR1	57.6979	66.0633	152.189	311.8	83.7024	84.2595	127.423	270.428	97.0583	98.4339	106.088	260.144
														HNRNPM	80.9283	102.38	175.767	351.73	105.495	132.099	176.822	322.765	103.272	109.446	136.603	289.072
														ILF3	77.9569	92.1483	150.016	217.579	82.6275	100.402	128.599	193.959	74.6898	92.6854	122.701	180.043
														RNA Processing
														HNRNPA2B1	197.831	179.791	352.622	568.552	174.855	199.921	338.995	621.5	187.441	219.085	393.496	576.093
														HNRNPD	100.801	129.198	302.245	750.652	171.564	211.449	254.729	665.276	197.251	200.27	216.239	588.994
														PTBP1	67.4525	100.109	212.09	470.46	93.6007	134.176	195.761	419.897	101.215	133.87	190.112	424.737
														HNRNPL	56.2657	99.2456	91.2244	275.77	86.903	172.945	109.242	233.798	117.692	129.688	76.1554	219.583
														HNRNPAB	22.0232	51.6362	280.792	606.191	44.7479	81.6261	234.558	545.943	44.4246	77.4098	230.046	488.599
														mRNA Splicing
														SRSF2	95.921	160.513	273.963	329.657	102.417	171.782	261.539	325.888	92.4321	146.038	247.312	318.561
														SNRPD2	111.522	120.907	164.077	327.474	119.209	158.117	125.516	298.009	164.273	164.104	133.852	246.977
														U2AF2	52.3755	58.4599	124.494	244.162	74.9493	98.2264	105.25	192.083	88.3383	87.1772	99.7834	176.452
														LSM7	46.5777	58.9319	103.037	273.215	58.2625	107.747	77.7044	230.163	64.9536	78.9357	85.2373	221.302
														SNRPB	34.9222	74.0543	170.292	332.638	60.5822	107.562	163.968	295.768	66.0984	97.055	152.841	247.93
														SRSF9	23.8549	37.7849	57.6636	208.324	43.9393	70.6931	69.5734	174.824	64.4627	55.7099	54.4236	176.308
														SAR DNA
														HNRNPU	62.7418	78.4923	171.481	213.028	70.9874	92.2292	125.851	193.375	66.8776	85.3617	114.275	179.433
														RNA Polymerase I
														POLR1C	7.95738	15.617	71.6147	66.7905	5.80103	11.2308	53.3283	65.7877	7.71922	13.2592	48.7935	49.2654
														RNA Polymerase II
														POLR2L	37.1472	49.5953	128.449	346.423	76.5812	124.683	119.956	363.606	95.423	130.343	123.924	374.599
														POLR2C	22.5488	30.2367	25.5588	65.5609	24.0838	25.9822	26.8459	68.8508	25.1799	26.1865	20.3176	51.9493
														POLR2E	20.7002	24.8481	27.7452	127.968	32.1636	44.0338	29.4942	100.094	40.9415	34.706	24.5827	100.45
														POLR2G	25.6399	24.4966	20.9245	56.9295	24.8603	23.7023	15.9399	53.9812	34.943	31.2413	11.3771	45.113
														POLR2H	15.3024	9.5171	19.7521	75.9588	14.8013	8.4973	13.0004	82.5499	14.9391	8.24804	15.3948	58.0377
														POLR2I	17.0516	19.8888	26.4019	94.6888	24.9404	27.1853	17.6355	69.0766	30.941	28.9801	18.9712	70.3931
														RNA Polymerase III
														POLR3K	5.84874	6.25438	9.55147	108.593	10.9091	10.3184	7.86439	83.9993	10.0758	8.72373	9.45536	68.3734
														TATA Box
														TAF15	129.038	122.728	173.046	450.545	156.035	198.915	128.372	312.272	216.869	166.525	102.189	277.682
														Other
														YBX1	29.8676	41.4001	84.3902	329.946	61.159	82.0707	85.5585	244.269	71.5223	86.5913	64.6189	219.429
														ALYREF	23.3179	32.6328	94.6875	226.691	47.041	63.793	95.5585	203.745	58.8265	59.1646	79.5457	180.026
														DNA Polymerase
														POLD2	21.988	22.284	74.5088	262.995	23.8851	30.4357	34.7189	206.151	27.1338	27.8425	27.8708	192.144
														DNA Repair
														TP53	13.1605	5.92029	25.1234	54.868	15.1482	7.78889	19.2934	50.8645	15.1068	8.70409	17.4595	55.5694

## Sheet: TRANSLATION
DOWNREGULATED FOLLOWING ACTIVATION														UPREGULATED FOLLOWING ACTIVATION
	NAÏVE CD4+ T CELLS				CENTRAL MEMORY CD4+ T CELLS				TRANSITIONAL MEMORY CD4+ T CELLS						NAÏVE CD4+ T CELLS				CENTRAL MEMORY CD4+ T CELLS				TRANSITIONAL MEMORY CD4+ T CELLS
GENE	0H	40MIN	150MIN	15HR	0H	40MIN	150MIN	15HR	0H	40MIN	150MIN	15HR		GENE	0H	40MIN	150MIN	15HR	0H	40MIN	150MIN	15HR	0H	40MIN	150MIN	15HR
RNPEPL1	52.4375	67.7542	34.8331	42.4546	116.768	137.104	90.1404	37.799	104.287	115.432	74.407	43.6908		EIF4A1	34.2669	75.1125	205.551	344.884	49.2826	79.2987	179.571	351.879	44.1052	88.3691	184.708	313.291
														EIF4G2	127.676	214.754	405.161	404.77	150.453	153.82	325.615	425.653	160.386	210.221	278.607	368.623
														KARS	41.4461	41.4313	60.2485	159.958	53.4201	47.7742	58.9489	145.389	48.0395	42.2771	50.8626	135.563
														EIF5A	16.2479	45.6118	160.733	536.599	44.6744	94.6533	169.021	515.597	69.3678	71.9517	117.299	428.489
														EIF4H	22.3383	44.0221	53.6826	94.4181	31.7586	67.0173	60.5887	83.1745	36.338	58.6737	54.8392	79.5851
														EIF4G1	18.8856	33.1753	127.562	312.784	25.6952	41.0967	101.005	272.58	26.2584	37.525	116.184	255.097
														GARS	16.9619	19.6544	147.524	283.767	14.5936	16.0196	70.1185	241.468	10.296	17.0537	66.5093	208.98
														MARS	27.6691	25.375	142.606	252.352	26.1603	23.3027	83.5139	216.328	25.5961	20.1223	86.1669	214.209
														PFDN2	15.0136	25.636	117.338	258.406	25.4105	43.1264	75.2091	237.337	28.5095	40.4059	79.5573	196.052
														EIF2C2	13.4513	15.8165	167.453	104.271	17.7678	23.793	132.689	84.5032	16.2134	23.8114	132.573	85.4479
														EIF3B	27.8537	32.0738	108.65	185.836	36.3139	41.2483	94.2077	157.17	32.8775	31.3229	79.9705	137.787
														EIF3I	33.6479	40.6302	86.3101	191.723	40.4173	47.9979	76.6043	170.111	46.4612	46.9449	66.8565	144.084
														EIF4A3	7.93416	43.4949	51.8978	92.127	13.44	49.7875	65.144	89.72	13.1671	33.5247	52.7203	82.092
														EIF5B	18.6754	17.9173	100.203	108.203	18.5315	18.2834	66.6693	107.155	17.6321	18.5163	66.8524	97.6605
														GSPT1	13.4983	24.8303	59.564	71.7237	17.1666	30.8356	61.8375	71.9021	16.951	28.2639	53.1375	66.4811
														LARP1	29.0419	21.1286	124.838	143.142	32.1008	23.3522	78.4052	135.231	32.0069	22.9665	75.7069	123.582
														PUS1	15.4379	13.1292	56.2187	103.228	19.7538	30.6335	54.6672	78.7154	27.8257	16.8888	50.462	69.0634
														SARS	34.6397	28.4256	115.205	128.919	35.8692	29.3403	69.772	112.156	38.8538	30.7419	57.325	104.281
														YARS	12.1404	11.7074	92.8011	135.699	13.1742	14.9633	52.512	125.624	13.967	15.6481	45.7043	110.661
														EIF3J	11.0092	10.8626	60.0995	71.4627	13.666	17.8123	49.7015	73.3458	14.0774	16.001	52.0265	70.5151
														TARS	8.05873	6.29806	95.2059	86.7103	6.70166	5.7574	48.5422	90.5188	6.33142	7.31516	56.0475	78.0351
														FARSA	14.3158	12.7996	57.5731	255.491	19.7637	18.8243	43.3375	221.611	20.7734	12.7061	44.4759	202.643
														AARS	12.6012	6.64518	57.0682	106.87	8.36304	5.4763	21.8866	89.1181	8.68977	4.6731	19.1053	82.6269
														ETF1	5.77101	21.0252	62.164	68.809	8.66335	17.4111	48.0653	67.2894	8.03133	22.133	45.8715	55.2904
														NARS	17.3822	13.5008	73.5073	93.2758	14.5838	10.3488	37.9639	85.4511	11.9867	8.69068	34.1442	71.4418
														NSUN2	14.1602	13.028	50.3547	74.7777	14.3035	15.3812	49.0844	73.1397	13.3199	12.7358	38.934	60.5698
														FKBP11	20.4817	23.5371	21.9542	90.4826	66.3803	82.3871	54.5277	102.404	64.8699	86.3602	81.1681	109.878
														EIF6	19.9125	12.6674	44.896	195.826	25.0594	27.6319	54.4705	176.731	25.485	23.0122	58.6632	182.563
														CAPRIN1	17.3762	14.9369	33.769	69.4436	16.1215	12.955	29.0876	70.2237	14.4327	12.2275	27.422	66.897
														CARS	9.17595	7.31159	41.1421	62.342	12.8829	9.62231	20.1871	56.3031	13.7286	11.4774	18.1852	53.4519
														CTU2	4.10255	5.81039	42.4632	68.4	6.5083	10.3731	26.3859	55.3185	8.44112	9.04665	21.6464	45.3639
														DOHH	2.39041	7.04502	26.361	55.4784	4.43846	9.08983	28.4303	51.4371	4.50694	5.64502	20.3158	44.1804
														DPH2	8.64641	6.8785	36.2541	73.3745	9.19003	7.54952	27.7722	70.8947	9.35696	6.05175	29.8132	60.8537
														DUS3L	15.0343	26.4537	36.156	79.9646	19.2593	33.0725	28.9211	58.0234	20.3766	24.4159	25.3424	59.4801
														EFTUD2	10.1375	9.23542	26.9659	64.7014	11.4571	8.20486	22.7215	59.9274	9.48827	8.08323	19.5123	56.7269
														EIF4E2	12.8595	21.8585	23.0578	59.412	19.3026	26.1438	24.1786	56.6887	25.8072	30.6652	20.0765	40.6898
														EIF4EBP1	3.35667	2.12887	9.46435	208.21	6.58881	7.36002	4.2897	114.337	6.80961	8.00444	3.02337	69.4251
														EPRS	15.9344	9.746	28.8179	61.6721	12.3147	6.65112	17.0263	59.8712	10.3846	7.14608	15.8465	47.7455
														GCN1L1	19.36	17.5426	42.2263	71.3753	20.568	18.7627	42.2911	64.5098	21.1157	17.8359	38.4907	61.9895
														HARS	17.3921	17.7142	25.6523	69.7866	17.7039	18.9362	24.318	66.7675	17.9863	16.5075	24.3152	66.6331
														IARS	13.9404	8.19463	48.7233	93.3134	10.1742	4.25208	23.1432	92.1785	9.19671	4.38646	18.1629	75.0967
														METAP2	13.3307	15.7041	39.9983	55.8989	14.6797	16.8609	29.0463	52.1267	10.9855	15.1036	29.3011	49.9465
														QTRT1	20.6264	22.3489	26.8411	81.8094	21.7127	32.3582	20.1931	70.3819	20.3686	19.0552	19.2087	65.8216
														TRMT1	20.8992	21.1483	36.1469	70.5041	19.4114	27.753	23.4931	69.7288	24.3975	20.3147	32.113	30.5218
														VARS	10.2786	8.14701	20.1006	109.537	17.3756	13.9684	15.7202	85.038	17.3656	13.7627	16.4586	81.6926
														WARS	1.47615	0.145574	24.6298	144.803	1.34444	1.14384	11.9541	292.84	0.737633	0.886221	15.8045	299.464
														WARS	8.36892	8.25816	39.737	347.057	10.0232	8.43048	23.8062	366.383	10.9724	10.1618	22.7629	435.663
														TRMT1	1.64641	2.89316	12.984	63.013	8.36739	2.49849	17.1242	38.4706	2.68692	3.62966	8.72734	60.9843
														AARSD1	7.79126	7.80029	17.9537	52.1988	7.37667	8.83539	10.7635	38.6635	8.65569	7.63753	9.90072	35.8118
														QARS	46.6663	48.6194	26.943	57.6524	55.2826	60.2889	42.7206	51.7586	58.0053	59.6779	36.9077	51.3031
														SLC38A5	6.50277	6.74232	4.93534	160.797	14.3951	14.1393	8.30483	186.562	15.7481	14.2467	10.0105	199.485
														PCBP1	170.955	167.291	220.248	353.344	284.226	241.056	244.979	373.635	245.947	230.742	240.316	402.598

## Sheet: LYSOSOMES
DOWNREGULATED FOLLOWING ACTIVATION														UPREGULATED FOLLOWING ACTIVATION
	NAÏVE CD4+ T CELLS				CENTRAL MEMORY CD4+ T CELLS				TRANSITIONAL MEMORY CD4+ T CELLS						NAÏVE CD4+ T CELLS				CENTRAL MEMORY CD4+ T CELLS				TRANSITIONAL MEMORY CD4+ T CELLS
GENE	0H	40MIN	150MIN	15HR	0H	40MIN	150MIN	15HR	0H	40MIN	150MIN	15HR		GENE	0H	40MIN	150MIN	15HR	0H	40MIN	150MIN	15HR	0H	40MIN	150MIN	15HR
LAPTM5	453.764	462.395	320.237	86.0205	506.602	431.93	449.658	98.4214	434.834	458.341	374.102	124.956		ATP6V0E1	45.6745	29.027	45.4994	102.697	57.5642	42.5142	43.5071	110.265	62.4695	43.1126	37.69	104.65
TMEM63A	95.6257	78.5487	18.2061	2.36696	94.3701	82.6557	25.3483	3.63402	81.6084	69.7187	18.7796	4.10519		ATP6V0B	11.2443	14.6938	19.3365	107.536	25.8975	51.1946	39.0381	145.013	30.8312	41.0799	39.979	142.215
														KXD1	30.4632	30.4962	31.1624	66.0556	40.8566	33.8213	24.7879	74.1261	38.2882	35.0738	23.9954	77.6411
														LAMTOR1	29.2076	31.5382	19.623	64.0689	39.9571	48.2615	24.7877	70.258	41.2914	37.9074	23.4963	77.0168
														USMG5	15.8399	16.252	22.9628	75.8111	23.2998	19.8965	20.8169	80.922	35.8611	28.6847	20.7012	58.6639

## Sheet: ER
DOWNREGULATED FOLLOWING ACTIVATION														UPREGULATED FOLLOWING ACTIVATION
	NAÏVE CD4+ T CELLS				CENTRAL MEMORY CD4+ T CELLS				TRANSITIONAL MEMORY CD4+ T CELLS						NAÏVE CD4+ T CELLS				CENTRAL MEMORY CD4+ T CELLS				TRANSITIONAL MEMORY CD4+ T CELLS
GENE	0H	40MIN	150MIN	15HR	0H	40MIN	150MIN	15HR	0H	40MIN	150MIN	15HR		GENE	0H	40MIN	150MIN	15HR	0H	40MIN	150MIN	15HR	0H	40MIN	150MIN	15HR
PLP2	84.1116	88.622	78.9369	40.8579	193.626	149.777	137.491	76.747	311.846	251.799	183.381	125.534		CALR	108.119	210.149	437.849	630.661	155.315	266.836	331.523	772.179	160.452	239.977	296.174	872.065
ATP2A3	79.022	83.7052	30.621	23.2498	120.993	146.624	60.6185	25.9563	126.018	120.04	41.3891	31.2879		SEC61B	20.0092	27.9048	78.4087	166.252	52.7236	70.6008	101.515	175.046	99.0465	81.3783	99.8163	170.103
ITPKB	57.4951	66.0989	41.3773	9.87099	53.4891	58.4824	53.1392	8.86649	41.6458	39.866	29.5307	8.75402		TAP1	33.7049	27.9554	66.452	307.537	58.7961	48.6268	157.66	370.093	54.9427	50.0265	185.331	452.891
MAL	128.46	120.977	38.0317	4.39485	149.414	171.16	47.258	7.05755	116.554	131.212	38.9412	6.41756		TMED9	21.1426	28.4038	75.8711	131.94	46.0078	64.4793	98.3308	149.524	59.0594	56.315	89.3657	164.576
SHISA5	67.72	62.2462	29.029	21.4415	114.358	109.306	36.4883	25.5199	98.2662	107.594	33.3327	39.2931		SEC61A1	25.9993	28.2105	60.2396	85.0016	49.4907	49.5257	84.3947	111.617	51.169	52.3474	88.2834	119.097
TMC6	71.6584	82.0264	18.9034	15.7064	131.924	157.857	47.7138	16.3532	97.831	98.6041	35.9384	24.7568		HERPUD1	8.92335	35.0273	57.5417	89.9806	27.7969	47.559	58.6553	127.501	37.0122	60.8479	47.4132	114.67
TMC8	165.95	176.532	32.4277	12.4081	172.917	194.529	38.4687	16.9049	189.036	153.461	29.0747	19.4292		SRPR	33.7542	48.5291	100.825	127.947	43.2268	45.4666	99.238	142.808	43.4928	52.963	95.6089	139.558
CCDC109B	59.4911	62.5052	30.9565	17.4944	50.4358	62.1172	32.8132	19.6189	38.8048	38.924	24.8699	15.9954		MANF	13.6865	28.3273	74.1918	150.366	22.8689	28.3249	64.4115	195.2	30.3435	37.5	85.3706	193.403
TMEM66	465.916	530.495	366.098	106.016	331.245	420.139	409.471	97.332	286.14	336.25	348.904	93.9813		PTPN1	25.4401	41.0768	68.7914	50.1947	35.9435	43.3257	110.242	57.1113	37.8977	46.4344	105.157	53.4109
GSTK1	161.841	144.448	61.6575	38.6059	272.466	232.731	97.1233	43.6852	290.658	269.147	101.696	47.8287		RPN1	18.968	26.8673	55.7868	103.32	34.2742	40.1375	84.8359	122.031	31.6771	37.5596	86.9019	126.093
DGKA	194.524	146.782	30.605	24.5617	167.519	104.519	38.7529	38.4733	128.842	102.179	30.5939	39.6704		CANX	31.0794	21.1008	52.3408	119.728	44.2878	30.6968	56.0732	147.623	49.2878	35.2521	49.3152	143.772
														CHERP	14.24	19.5455	54.9809	87.4755	24.356	26.1668	41.1886	74.6302	25.2707	27.8064	42.199	78.7308
														DNAJB11	7.31636	23.1635	53.639	71.1799	9.8558	22.5883	41.3014	91.5412	12.0656	23.8088	41.1062	86.2309
														EMC6	10.4217	27.9522	54.7563	68.0059	21.7637	33.5932	42.8201	74.3914	17.9749	33.4893	44.8651	78.6135
														CD200	1.30503	3.20179	242.57	55.7869	0.375454	0.393176	68.5695	30.3503	0	0	37.1286	22.0762
														MFNG	43.1031	43.0082	26.6798	88.721	62.5356	67.6734	37.1969	79.4489	56.561	69.9478	29.6141	80.3778
														TRAPPC1	44.3522	36.8747	25.5336	67.3956	73.169	56.4297	25.1319	79.3741	81.6303	62.0724	26.2111	80.846
														TRAPPC5	34.7555	37.9927	25.5043	85.5315	70.847	77.031	41.8424	94.1987	50.4286	59.3881	41.8577	113.509
														SPCS1	28.4176	33.75	38.1728	103.882	50.6342	45.3208	31.9608	95.5781	45.4323	56.8268	32.2196	92.0234
														ATP2A2	11.9981	16.8614	41.8838	107.132	14.9027	21.5586	74.7737	138.711	18.3013	23.0406	72.1604	133.018
														DDOST	28.8687	35.9182	45.4612	119.243	48.7022	49.1187	59.6471	119.073	46.1523	47.2383	46.4199	103.605
														HYOU1	5.95284	16.9017	42.2078	116.299	23.494	31.6206	52.2802	140.41	29.7261	38.082	38.731	144.985
														LMAN2	29.7691	29.4923	41.1432	86.7193	46.7045	47.1242	51.6023	101.8	50.9839	52.7151	51.5067	112.543
														SEC24C	19.2653	19.8314	38.4515	55.6618	26.6215	26.912	51.1119	65.7693	27.998	26.5428	48.3946	61.7135
														ALG3	11.1369	8.90047	30.0209	70.5792	14.0456	12.6014	15.365	72.4119	14.5526	10.1427	19.072	86.4247
														ANXA7	21.6998	25.6971	43.0841	62.4274	24.7589	25.8993	46.351	69.6184	25.2407	28.8135	40.8567	57.4184
														ASNA1	13.7733	16.5813	26.8586	82.8591	26.7904	40.7064	33.4535	75.1035	38.4755	36.2999	24.077	77.9634
														ATP13A1	31.6289	23.9645	29.0644	68.1941	43.7701	33.2317	30.1218	70.6564	38.7248	25.91	25.3165	83.8388
														EMC4	22.2867	31.1171	48.8173	97.7042	32.6506	47.8925	48.3207	90.7767	38.3198	39.3314	43.1804	85.7163
														EMC7	14.2389	24.9447	38.8087	53.6972	23.871	35.4032	41.9926	66.6446	25.4457	34.5285	44.23	56.6345
														GMPPB	5.97124	10.3036	10.2687	56.13	12.6001	24.9933	21.6798	61.3987	18.2896	17.1534	14.796	51.5346
														GPAA1	16.3808	20.5093	13.8707	65.8649	23.9187	27.8444	19.3639	50.6165	21.6352	17.6908	13.4859	62.9225
														KDELR1	20.6882	23.7392	16.2478	52.3225	35.7091	31.7842	17.6274	59.9928	41.9316	40.213	16.2352	48.8879
														NFE2L1	11.7472	10.0848	18.4368	85.3516	16.7694	17.5785	24.0102	80.9323	17.3052	16.1163	22.3083	74.0897
														NMT1	16.7413	11.5959	19.497	55.3684	20.9273	17.8103	19.2781	53.6366	20.7082	15.4221	18.2568	52.0941
														PDIA3	18.8387	26.0382	34.1959	59.7764	26.0948	24.3422	31.0379	72.0837	29.4715	26.8464	29.9335	67.2168
														PDIA4	14.9164	9.4799	27.9944	62.4464	22.6125	16.0996	19.4986	83.9097	27.3578	18.3513	14.8974	85.4776
														PDIA6	14.3854	13.3636	23.2606	92.1618	29.3151	21.8196	40.6738	137.106	36.4617	25.7076	39.4417	131.192
														RPN2	40.5764	34.9369	36.8547	75.2535	48.8867	36.0268	45.5096	86.5541	48.1787	38.2107	42.3518	88.0598
														SCYL1	18.9402	18.0004	18.7398	51.1729	24.3578	23.4425	21.2635	50.9624	19.8207	23.5052	23.8748	58.8039
														SDF2L1	12.0651	26.3127	39.0384	131.651	25.9029	55.1258	45.3592	151.605	33.4637	41.2425	39.2235	181.385
														SEC11C	12.2888	11.4946	25.2488	63.2607	22.1668	28.7515	35.3045	101.959	26.8179	29.8798	38.5737	99.7652
														SEC13	13.5352	17.1601	32.7776	100.443	20.7863	26.0463	37.932	88.7437	24.2798	26.6107	28.68	101.652
														SIGMAR1	21.9472	17.5776	20.7323	112.848	38.7611	38.9784	25.8098	97.0024	42.0362	39.1064	20.5329	103.88
														SRPRB	3.96321	6.4883	42.4027	50.2941	5.65284	6.4778	26.7432	59.2256	5.53995	8.14417	26.2739	45.2646
														STX4	26.3017	31.1061	44.9913	70.8186	47.3211	52.3788	39.1459	57.1061	58.5408	50.1352	28.8564	65.9467
														SYNGR2	13.2765	17.2723	45.6692	123.079	24.3702	33.718	44.5549	111.511	30.2977	27.121	41.5981	118.881
														TAP2	24.9615	22.6943	16.3195	79.5545	26.1281	29.1819	14.05	82.7185	25.1511	25.1658	16.0961	95.1408
														TSTA3	16.3187	13.3845	35.4741	166.71	29.4193	25.3648	32.4677	118.691	29.3181	29.4586	30.4713	107.249
														RAB8A	20.5104	19.3966	31.0078	60.7213	37.0091	25.9368	34.1444	86.4766	34.1501	34.7423	39.1291	90.0276
														PIGT	23.6275	34.6256	63.2335	79.3074	41.383	44.4361	52.6966	69.9026	41.7557	46.1247	46.2924	76.438
														CYB5R3	14.2606	21.3999	36.8453	53.3574	31.1095	39.5313	39.9053	58.0474	32.8839	44.0318	45.7882	66.4348
														DHCR24	1.60497	1.26708	1.07959	65.5784	1.32053	1.27163	1.00797	54.653	1.36478	1.48272	0.848321	51.6712

## Sheet: RIBOSOME
DOWNREGULATED FOLLOWING ACTIVATION														UPREGULATED FOLLOWING ACTIVATION
	NAÏVE CD4+ T CELLS				CENTRAL MEMORY CD4+ T CELLS				TRANSITIONAL MEMORY CD4+ T CELLS						NAÏVE CD4+ T CELLS				CENTRAL MEMORY CD4+ T CELLS				TRANSITIONAL MEMORY CD4+ T CELLS
GENE	0H	40MIN	150MIN	15HR	0H	40MIN	150MIN	15HR	0H	40MIN	150MIN	15HR		GENE	0H	40MIN	150MIN	15HR	0H	40MIN	150MIN	15HR	0H	40MIN	150MIN	15HR
RPL13A	227.479	257.632	144.763	124.91	258.274	220.874	201.881	136.123	250.916	227.633	196.49	129.448		FBL	159.496	209.056	449.404	794.841	223.048	321.867	327.53	666.739	262.063	278.109	334.833	535.821
RPL14	201.371	208.964	173.86	189.173	238.274	202.858	197.975	167.71	232.738	205.151	193.44	185.525		RPL8	119.243	248.309	220.59	825.085	296.994	585.03	370.327	751.04	145.863	381.576	517.489	1027.19
RPS27	99.1638	86.5172	67.0221	14.7016	62.602	124.222	59.0069	10.4988	119.344	90.2291	67.0849	10.2454		NCL	167.857	187.62	714.585	1397.8	184.232	189.685	429.267	1147.43	184.664	210.582	397.829	1078.49
RPL10	61.1212	54.9368	47.2508	28.69	72.0572	83.4425	59.7746	38.9332	83.6904	84.6121	74.5542	35.2566		RPLP0	138.891	162.871	134.214	265.707	187.735	190.724	222.784	259.85	189.204	189.312	214.325	225.697
RPL15	68.8968	43.8147	8.60282	6.45453	42.6467	10.4881	15.8096	5.7958	33.1689	7.5762	6.97814	6.69447		NPM1	84.9082	91.9303	187.224	431.871	70.1024	83.0881	120.257	391.764	86.9196	102.767	128.395	297.471
RPL22	54.7239	44.9966	38.5981	27.1717	35.8477	27.7086	30.4709	25.7429	50.1369	34.3266	34.1294	18.9725		DDX39A	30.5727	60.2435	132.507	286.264	36.1939	85.7183	100.867	243.278	41.8975	88.9851	85.8383	212.352
														TRMT112	34.287	43.2604	81.1363	200.685	54.9537	88.9118	81.1831	189.009	68.6778	74.7533	87.8847	198.818
														NOL7	37.4208	49.9624	125.23	292.822	44.7587	71.5888	95.6613	235.748	61.3141	56.4999	90.5311	191.328
														SNHG15	20.416	41.4751	79.4872	95.8463	33.3758	65.9728	60.2881	115.527	36.4225	55.1384	69.6434	111.213
														IMP4	27.9581	38.6163	104.173	271.603	35.8636	54.6581	86.9703	239.797	35.6159	40.8175	95.8945	247.114
														NOP10	29.7192	36.978	225.354	214.044	31.7371	34.6369	110.914	223.111	29.2737	37.5823	147.896	229.101
														DDX21	21.0191	46.2117	261.34	241.5	19.2969	31.4408	160.389	240.688	19.4341	40.5561	161.541	192.981
														NHP2	21.7528	26.9279	60.3589	228.969	37.228	47.9899	53.4119	192.3	37.1145	38.0599	59.8039	192.29
														NOLC1	20.8572	24.8214	187.534	202.932	18.778	18.112	109.986	186.68	16.2517	18.369	123.299	176.183
														NOP56	35.8727	39.2102	162.361	216.918	41.1803	46.6691	102.941	192.096	37.3042	41.1555	111.687	175.331
														GNL3	16.8888	21.8543	90.1427	99.2412	9.175	9.13184	51.8821	99.614	9.98878	14.7506	53.5678	96.6085
														GRWD1	6.59125	17.3737	69.0566	109.614	9.08234	23.878	61.6177	99.6814	12.6768	17.8156	57.8067	88.5859
														GTPBP4	10.0318	12.3952	76.4717	101.941	10.185	9.70084	51.7443	102.294	7.94651	11.0926	52.0034	95.4878
														NOB1	14.7385	18.6978	68.7721	112.928	21.3416	21.3435	50.6478	95.5163	20.7825	19.4273	53.4751	93.7807
														NOP16	6.92947	6.80723	91.6757	155.29	10.2053	9.50595	70.459	163.395	3.6757	7.00995	89.6068	178.92
														NOP58	36.7261	48.2239	115.273	113.257	32.2763	28.4022	88.783	123.937	24.6788	25.8725	85.3796	112.094
														RRP12	3.06273	8.90435	70.3332	90.0052	4.92588	14.2916	64.1614	83.594	3.87632	16.4444	51.0715	78.4617
														RRS1	14.173	13.6102	91.5324	137.208	28.4922	35.0143	60.6272	129.229	36.9421	32.4873	62.7195	117.342
														WDR74	29.8312	45.8077	106.987	159.348	24.1112	42.9001	68.7836	137.366	30.5054	32.2368	69.0273	119.916
														IMP3	30.7521	28.6692	101.985	99.2475	36.4099	32.9037	56.7121	99.8309	25.89	26.4021	48.7694	94.0881
														WDR43	11.2949	15.6384	75.359	89.8474	10.5556	13.6995	48.3068	82.5588	9.91698	13.7477	50.3936	78.6647
														GAR1	9.73023	15.7738	69.6199	210.138	13.5447	18.4549	36.1263	198.219	16.9884	21.9249	38.7576	151.486
														BRIX1	12.7812	11.7099	50.4117	79.951	10.0689	10.9604	32.2401	76.6493	12.3028	13.7487	29.2417	52.7322
														CIRH1A	12.1344	11.3584	71.6769	65.5638	11.4472	7.06063	45.2108	73.1443	9.29229	7.94978	42.0171	59.1647
														DDX27	19.6403	26.8748	72.3034	73.1679	26.5602	26.0478	46.2993	62.4237	21.8449	23.2325	37.9683	52.0408
														EBNA1BP2	8.99841	7.47171	62.7069	164.392	8.52101	9.11622	30.7581	156.669	12.0736	9.06957	30.3332	121.157
														EMG1	12.0494	17.6604	67.2505	150.221	11.5125	20.1709	45.4817	122.337	19.3982	18.4991	41.4237	96.0654
														GNL2	7.4423	10.1971	78.1701	77.6135	8.4549	10.6191	43.827	70.7051	6.91295	11.7104	45.2668	62.4435
														MYBBP1A	15.2752	15.3038	62.8225	118.246	17.7542	22.8627	47.4352	97.033	18.9664	16.8507	48.9261	85.2915
														NOL6	13.0796	12.3778	51.9944	84.9739	13.0686	11.9488	33.8538	75.7026	11.6253	10.0679	34.4276	70.0257
														NOP14	14.7455	13.2638	57.5076	104.063	16.757	14.6542	45.7253	103.34	15.4673	15.8161	45.7982	101.128
														NOP2	14.2018	12.4931	62.7778	130.525	12.5548	15.5366	45.9608	119.879	15.3617	15.3052	46.3495	104.871
														PWP2	7.58119	10.8111	53.551	83.9947	9.14022	10.8336	36.0924	75.1465	7.29301	8.56441	26.8736	66.2787
														RRP1	6.61064	11.8681	80.6009	139.747	11.331	16.6493	48.6598	115.71	11.2777	14.6439	41.2006	98.3452
														RRP9	7.20778	8.2602	67.8788	176.75	9.17011	9.18379	37.0569	133.535	13.5741	9.45241	35.9068	113.424
														SURF6	10.4533	10.643	51.2508	86.621	13.6505	16.6541	28.078	63.4107	15.9619	11.4655	20.1758	57.4267
														PNO1	4.17941	11.9726	73.1721	60.4663	5.29392	14.6366	41.6918	60.2547	7.42957	13.0947	41.2525	41.4498
														RPF2	5.469	4.3211	59.1473	64.4409	4.03444	2.52697	24.1006	59.9351	5.56731	5.04977	22.258	42.3151
														RSL24D1	22.9585	26.4097	59.0679	55.7534	15.8215	17.1684	35.7124	65.2631	15.5002	19.591	43.1376	49.8448
														BOP1	3.03769	3.89985	18.6972	82.7724	6.24329	7.07404	11.9942	62.657	7.55404	5.44383	10.0687	61.5018
														C3orf26	6.06141	6.44254	9.98478	62.5728	4.46604	8.3304	5.26847	51.7135	4.60214	5.75944	4.92661	51.8955
														DDX41	18.7944	16.0399	30.1516	91.9982	24.9222	26.733	27.4782	80.2627	25.2008	24.0147	29.1307	77.0563
														DDX49	9.75977	11.8215	28.3471	91.4362	13.885	15.7297	25.0015	67.2876	14.7641	12.4163	20.8692	64.7914
														DDX54	17.6877	22.292	34.0972	101.05	23.8828	38.9545	31.4607	85.7822	23.745	30.451	32.113	88.4885
														DDX56	17.4399	19.9887	32.9294	57.337	17.5033	16.7746	27.8805	52.9959	16.2933	14.7263	28.5735	45.5971
														EXOSC4	3.03756	4.58181	20.4866	124.391	2.60391	6.57681	16.3266	99.8919	4.21658	3.37563	13.1546	107.148
														FTSJ1	17.339	10.2688	37.6385	65.0304	20.6879	19.3276	28.8582	73.2299	13.311	19.8687	23.7276	74.085
														FTSJ3	11.7693	10.1353	40.8818	91.6024	11.6402	14.4143	29.0436	79.6321	11.8937	11.4873	31.5344	84.303
														LTV1	11.0812	14.8161	30.6332	57.3778	7.89192	9.37415	16.601	54.143	7.59345	7.98285	16.4166	47.909
														LYAR	6.88216	5.30081	48.6493	107.692	14.8622	10.9816	29.6586	97.4808	17.6891	13.0885	25.175	89.2528
														MRTO4	3.78748	3.90076	34.8159	68.5418	3.51531	3.8365	23.5345	62.8759	2.49044	3.1625	22.7753	55.2422
														NOC2L	13.5258	13.7909	47.5552	136.966	14.4059	25.2267	31.309	106.604	18.7975	17.7073	30.7885	99.3222
														NOC4L	9.99491	17.6228	41.8397	88.9373	10.812	24.1787	31.8438	77.7542	17.4586	19.4059	31.933	69.5946
														PA2G4	18.1956	15.4048	37.4145	142.195	23.3278	20.0077	26.516	139.293	17.2453	22.1767	34.4167	149.269
														POP7	6.36429	6.4215	13.7806	76.2186	13.753	13.801	11.4521	67.9048	14.5771	12.184	10.5889	56.9133
														RPL17	15.548	24.7308	22.7999	58.8811	30.1831	39.0559	33.7123	73.8656	26.6276	35.204	43.766	43.9993
														RPS19BP1	15.33	20.564	22.5783	113.938	28.5521	42.0967	28.3735	119.777	26.2581	28.8824	31.0043	122.846
														RPS6KB2	22.2711	21.5399	20.4004	50.6783	33.481	37.3202	24.9103	59.0192	40.1903	28.7817	17.0204	55.8724
														RRP1B	11.7573	12.8325	22.6464	59.2021	12.2713	13.4568	14.912	50.1734	12.2036	13.5164	13.0696	46.7752
														SENP3,SENP3-EIF4A1	13.4222	15.6406	32.4548	65.2245	18.3708	19.3504	28.3421	57.8941	21.0118	19.4297	23.584	48.3646
														SNHG12	16.6102	24.85	26.5667	65.5774	21.6246	37.4657	33.3564	55.7196	24.0014	33.5516	32.8002	54.3397
														SNORD86	9.79153	8.54772	32.7612	140.244	8.6155	4.86422	30.5379	97.435	28.8585	8.64499	19.0109	79.561
														TCOF1	15.2268	15.0292	29.1203	98.6144	20.6959	22.2667	21.4466	77.9956	22.843	21.8618	23.0984	73.967
														TSR2	24.8203	39.9524	40.5372	82.0546	33.0167	49.6521	36.0302	68.9941	38.1369	44.7043	29.5092	75.2588
														TSR3	15.1659	20.7306	18.4742	105.449	31.3364	53.6289	25.2283	85.9217	41.8404	40.8001	21.6144	76.7228
														WDR46	12.4964	9.17382	36.0066	104.405	17.2093	13.1693	29.2738	94.9115	18.1343	13.0534	28.6433	83.073
														DKC1	13.0251	16.1426	76.0959	151.219	12.0501	14.6356	46.2115	132.262	11.2357	11.9809	48.4813	122.519

## Sheet: GOLGI
DOWNREGULATED FOLLOWING ACTIVATION														UPREGULATED FOLLOWING ACTIVATION
	NAÏVE CD4+ T CELLS				CENTRAL MEMORY CD4+ T CELLS				TRANSITIONAL MEMORY CD4+ T CELLS						NAÏVE CD4+ T CELLS				CENTRAL MEMORY CD4+ T CELLS				TRANSITIONAL MEMORY CD4+ T CELLS
GENE	0H	40MIN	150MIN	15HR	0H	40MIN	150MIN	15HR	0H	40MIN	150MIN	15HR		GENE	0H	40MIN	150MIN	15HR	0H	40MIN	150MIN	15HR	0H	40MIN	150MIN	15HR
ANXA6	90.4747	73.5679	19.5877	25.5763	152.976	138.004	30.1799	40.568	160.682	147.529	36.1088	57.2912		SDF4	29.7378	37.4087	98.7974	128.569	60.9023	90.6303	163.859	194.941	68.1165	85.1554	171.439	212.951
ACAP1	130.849	121.547	33.8297	15.9786	181.199	177.763	46.205	19.9318	176.128	159.55	39.2115	28.319		SURF4	24.4039	26.765	56.4547	119.518	51.1336	60.9456	123.212	186.771	55.1649	68.0725	135.641	217.82
AP1G2	80.2522	66.6806	29.7579	23.3394	87.7741	70.4208	33.2239	21.671	86.2761	64.9489	33.0504	26.2584		SCAMP3	25.1544	23.7234	71.5221	150.649	36.7438	35.3625	45.1722	145.236	33.7286	31.3459	52.2684	151.549
PACS1	101.13	121.006	42.5125	26.9044	120.819	126.303	45.3335	29.5266	110.158	117.349	35.2982	33.8165		TMED2	30.128	25.8048	45.868	70.0276	41.4987	36.4032	55.9416	85.9134	45.176	42.9261	62.952	83.7297
SYTL1	59.6032	59.358	16.2546	4.00899	129.134	127.98	36.0443	4.35937	143.703	108.588	33.9598	5.57791		AP1B1	16.8012	15.8345	23.1786	64.0238	22.0632	23.8823	25.1742	66.7831	20.7624	20.5891	23.7149	64.7879
STX16,STX16-NPEPL1	69.3365	53.4304	19.7015	19.3613	58.7116	52.1023	16.717	18.0219	52.8255	46.6015	14.2333	14.4538		AP2S1	14.069	14.7552	18.1712	66.3851	25.9997	26.2042	21.2973	63.7082	28.5322	23.0862	22.1729	62.2793
														AP3D1	27.1582	21.9031	31.2902	58.5892	41.9145	42.6758	46.034	71.0854	40.0422	36.7997	43.0984	82.0021
														COPG1	15.45	14.1873	21.6079	63.5397	19.8739	15.6025	31.4146	68.9044	18.6605	16.708	28.8376	77.1133
														COPS6	23.2116	23.4883	19.6647	63.9493	39.7178	37.3293	17.7444	70.9469	38.0032	38.0162	15.6736	74.4466
														YIF1A	8.01041	9.19467	36.8404	105.777	14.8496	24.3097	29.244	106.052	17.6741	15.2412	35.5235	100.249
														B4GALT3	13.9693	17.6063	20.6014	50.5242	17.894	20.8531	21.5549	49.6078	17.2231	19.9299	21.4213	52.9679
														ARF1	77.2669	133.235	174.476	275.502	151.622	194.777	264.94	297.683	168.162	212.073	238.732	309.225
														RAB1B	24.7357	29.2524	49.2164	76.939	46.1502	53.861	47.9008	78.9221	48.7414	51.1037	57.8308	93.1995
														SLC35A4	23.6574	24.4436	56.0854	69.5449	30.1979	27.8973	45.2877	67.8391	29.401	24.1921	43.2031	70.3801

## Sheet: DNA
DOWNREGULATED FOLLOWING ACTIVATION														UPREGULATED FOLLOWING ACTIVATION
	NAÏVE CD4+ T CELLS				CENTRAL MEMORY CD4+ T CELLS				TRANSITIONAL MEMORY CD4+ T CELLS						NAÏVE CD4+ T CELLS				CENTRAL MEMORY CD4+ T CELLS				TRANSITIONAL MEMORY CD4+ T CELLS
GENE	0H	40MIN	150MIN	15HR	0H	40MIN	150MIN	15HR	0H	40MIN	150MIN	15HR		GENE	0H	40MIN	150MIN	15HR	0H	40MIN	150MIN	15HR	0H	40MIN	150MIN	15HR
MIR3064	146.041	189.755	83.212	36.5975	78.1878	79.276	102.036	41.269	51.4615	91.5513	73.4526	45.4059
PHF1	60.6279	116.634	108.942	10.6456	88.9338	159.3	118.387	13.6574	106.605	143.82	94.0369	18.6512		Histone Deacetylase Complex
EVL	294.174	229.723	58.903	47.088	376.849	281.21	81.4671	49.8407	368.984	270.854	85.5352	62.3111		SAP18	32.688	50.0928	68.2395	94.0465	37.9085	57.0367	51.8526	91.4951	54.8609	65.6496	45.8241	79.7061
PRMT2	82.0953	62.9881	22.795	7.27349	60.7536	52.3408	31.6313	9.66672	42.2769	34.4502	20.6138	12.5557		SET	30.7869	28.5842	56.7218	177.645	48.1253	48.9391	51.7655	152.454	49.5137	45.4083	47.6019	160.535
														HDAC7	40.6354	41.7474	24.5649	92.769	57.4098	56.0188	37.0317	91.2772	52.8066	40.6774	30.0291	94.6224
														HDAC1	48.7162	40.2032	20.4742	81.3861	45.6961	39.202	23.6384	84.1332	48.7297	37.1677	20.7832	74.0957
Nucleolar Condensation
H1FX	158.599	205.149	40.3386	45.5693	406.99	490.339	70.024	55.1512	445.748	369.256	43.9738	52.5466		Heterochromatin Assembly
														HMGA1	19.029	49.1341	217.057	339.941	52.9844	39.8662	102.553	182.135	47.3213	60.2565	111.21	131.444
														SAFB	31.5169	28.7839	57.0763	97.2475	36.9252	44.8786	61.1912	74.1219	33.6724	36.0167	52.3444	71.1987
														ASXL1	25.1833	28.3263	50.0896	59.4802	26.721	29.1461	39.3915	56.6242	32.3159	34.7863	37.292	59.8077
														CBX3	20.0191	14.496	12.5169	54.9937	15.6988	16.323	13.9969	52.1096	21.5892	14.4128	12.7051	49.5105
														H2AFY	33.5981	33.8824	27.531	101.812	40.4842	48.4563	32.2737	90.7982	45.3072	36.6617	26.5698	76.9004
														H2AFZ	22.4877	26.6836	32.5129	81.156	23.7304	37.0638	30.7261	63.7838	29.8879	33.4429	36.2	57.9105
														Chromatin Remodeling
														H2AFX	4.91294	30.5427	34.7472	74.8492	14.8386	44.4777	49.6929	67.689	18.2414	43.2281	48.3657	62.0804
														Polycomb Repressive Complex 1
														CBX6	9.74319	13.2942	53.2346	148.025	16.5038	20.8803	41.7973	133.795	19.8623	21.1036	43.5495	119.487
														Polycomb Repressive Complex 2
														C17orf96	0.127566	0.514852	62.4889	82.3189	0.360871	1.14777	44.309	69.1198	0.0584367	1.0647	56.4616	55.2212
														EED	6.49374	6.49297	10.7335	73.1396	6.83699	10.564	27.2251	109.684	9.71519	12.3864	34.9293	89.6801
														SWI/SNF
														ARID1A	39.383	37.7235	38.2605	57.0947	48.3676	49.8723	42.6208	56.7428	55.99	49.0063	38.5445	61.6263
														SMARCB1	16.3205	17.1431	22.3026	78.0079	23.7957	26.8415	26.5864	64.2021	25.5034	25.2723	18.8056	61.9923
														INO80 Chromatin Remodeling
														INO80B,INO80B-WBP1	15.5537	23.8076	39.442	65.1891	22.6721	40.6011	33.956	53.1222	31.3322	29.6759	29.4993	49.5369
														H2AFZ	22.4877	26.6836	32.5129	81.156	23.7304	37.0638	30.7261	63.7838	29.8879	33.4429	36.2	57.9105
														RUVBL1	8.64361	6.39406	19.0049	93.5845	12.24	10.6045	15.0924	80.8354	13.0206	9.60474	11.2618	72.7163
														RUVBL2	12.7338	12.8483	28.5678	199.884	20.1368	25.3465	22.5436	163.02	20.5431	17.9233	26.2965	163.333
														NuRD Complex
														HDAC1	48.7162	40.2032	20.4742	81.3861	45.6961	39.202	23.6384	84.1332	48.7297	37.1677	20.7832	74.0957
														MTA1	30.1154	30.4866	21.9647	77.7206	41.9016	42.7011	20.1581	61.2805	39.3189	35.9306	17.1834	61.6858
														MTA2	35.0977	28.8542	49.4439	99.4894	48.0029	42.7636	47.2401	98.2521	52.1993	44.3669	46.0348	89.5425
														MBD3	16.2414	19.6628	44.6466	102.499	22.8978	31.351	34.9066	79.8913	21.1624	22.5945	33.7616	83.8493
														CHD4	30.6096	28.4283	120.627	89.8349	30.8742	35.4009	99.0773	82.4162	30.4951	37.2813	100.6	87.0855
														SRCAP Complex
														SRCAP	34.5921	41.363	47.8764	70.4521	36.2681	40.4006	43.2847	62.886	36.7872	41.0987	39.4247	65.7783
														H2AFZ	22.4877	26.6836	32.5129	81.156	23.7304	37.0638	30.7261	63.7838	29.8879	33.4429	36.2	57.9105
														RUVBL1	8.64361	6.39406	19.0049	93.5845	12.24	10.6045	15.0924	80.8354	13.0206	9.60474	11.2618	72.7163
														RUVBL2	12.7338	12.8483	28.5678	199.884	20.1368	25.3465	22.5436	163.02	20.5431	17.9233	26.2965	163.333
														Chromatin Remodeling for Transcription Activation
														SSRP1	30.2614	24.0021	53.9668	186.869	35.5486	23.3553	38.2228	157.663	30.3219	26.2018	32.6131	133.415
														HMGN1	34.8103	32.9346	20.4945	70.6411	41.9991	47.3133	21.4371	57.134	43.1213	44.7395	20.7129	45.0438
														NPM3	6.38768	5.56048	15.5323	93.1421	5.88415	6.96038	10.7215	77.6441	5.80922	5.70193	11.253	76.5429
														Sirtuin Inhibitor
														KIAA1967	24.769	30.8911	47.0398	67.5043	26.9307	28.6036	44.9846	51.9137	27.4398	26.3822	39.0895	44.1678
														Nuclear Receptor-mediated Chromatin Remodeling
														ZMIZ2	15.7348	28.8184	48.6597	54.8565	38.6369	50.907	52.7427	55.1358	49.382	45.4941	35.7256	47.1377
														Nucleotide Excision Repair
														RAD23A	50.4844	55.6072	86.978	300.08	78.8128	77.5354	79.7108	268.131	94.6274	88.0065	83.3865	266.721
														DDB1	19.0731	17.7975	45.031	101.601	23.3111	20.6198	45.2133	100.34	22.7418	19.9222	43.0063	87.9224
														RAD23B	13.1249	13.72	26.03	70.0118	19.9979	20.9425	23.7518	61.455	19.6307	19.0652	22.1638	58.7547
														Helicases & TopoIsomerases
														G3BP1	14.5142	14.3442	83.0519	133.203	15.6033	13.8799	62.9709	115.262	15.5903	13.1094	56.4687	94.3335
														TOP1	9.98606	15.2158	65.4047	84.9105	11.8616	14.0161	60.8259	86.5699	10.6149	17.9725	65.2573	76.987
														XRCC6	37.0006	42.5811	101.349	173.156	39.3334	36.7948	68.6252	149.63	37.8623	44.7389	54.06	119.703
														DNA Replication
														MCM2	3.49057	5.35755	4.15566	128.24	3.87803	3.9361	3.81117	83.9363	4.28596	4.82367	2.36968	60.4769
														MCM5	11.8914	12.2976	6.86197	119.797	16.1495	16.1837	6.73748	94.7103	13.2663	13.7078	6.46038	75.5672
														MCM6	6.34128	9.71632	10.1744	64.0432	5.40669	6.85056	12.6158	54.0698	5.38124	8.08784	9.46385	38.6172
														MCM7	3.0362	3.52391	4.57933	165.249	3.095	6.51444	7.20266	103.754	5.75232	6.71849	6.18601	66.6437
														PCNA	0	6.51769	9.64408	57.9478	1.43935	0	14.0097	56.2371	0	6.85124	11.3345	39.9412
														DNA Methylation
														WBSCR22	20.2667	40.3066	83.324	131.668	26.5264	50.5949	63.6702	111.086	35.5429	42.5492	55.1069	95.1605
														DNMT1	26.1551	17.2087	16.9229	75.3576	31.7307	25.4798	21.6762	63.1102	28.1922	21.2567	19.7517	58.2145
														Telomeres
														TERF2IP	37.3708	46.3829	52.0993	51.6196	37.3742	47.946	55.7144	59.9541	34.8275	48.7891	53.579	56.6886
														JTB	32.7456	35.433	37.5661	99.9527	49.386	49.2962	46.4967	104.17	43.2142	41.8199	41.3596	82.0558
														Centromeres
														SSSCA1	11.7779	22.7931	57.7248	159.485	12.7266	30.3346	41.7717	130.088	25.9668	33.1334	53.7417	126.47
														CENPB	16.8536	18.4197	30.1338	55.3215	34.2307	37.1536	42.1458	50.0408	36.7418	29.7864	31.8843	45.374
														Nuclear Pore & Transport
														RAN	37.0374	44.7564	151.818	316.256	38.8572	42.3397	153.046	345.724	38.5841	43.4809	166.187	298.28
														RANGAP1	20.2206	31.734	73.648	137.958	23.5838	42.9379	89.0414	121.293	27.1702	35.8988	59.4894	109.416
														KPNA2	3.95268	17.3522	27.7592	66.8182	7.39842	12.3318	23.5517	79.544	7.43332	17.3632	25.1837	77.0387
														KPNB1	43.0737	39.1112	55.4215	192.483	32.4132	28.2306	50.2993	191.876	29.2852	28.3696	46.3653	184.33
														NUP188	15.5308	13.4228	52.0413	104.272	15.318	12.9909	35.668	102.455	14.6602	13.3222	35.3476	105.459
														IPO4	8.72897	8.05479	37.326	126.232	12.4732	12.3197	24.2917	106.14	11.5643	11.9189	25.4673	103.934
														IPO5	13.9111	11.144	21.9462	52.3536	10.456	7.04661	18.4181	50.1057	8.20537	7.02974	16.5003	39.3447
														NUP62	12.1664	6.62577	28.974	97.9697	15.0458	12.0455	36.4763	122.027	20.9339	14.4498	33.2071	143.812
														NUTF2	26.4534	20.5149	34.2633	136.435	41.71	34.9405	24.0934	142.318	30.8808	40.6839	36.3473	170.134
														RANBP1	12.581	12.2866	41.5808	207.538	22.9736	26.8812	38.2341	181.064	19.2107	24.6306	47.3976	176.96
														RCC1,SNHG3	31.0799	32.203	16.7059	51.3074	23.4936	21.349	18.2896	58.9849	18.646	21.6615	15.5117	58.0015
														SEH1L	5.56351	4.97591	29.1319	64.3154	4.20647	5.34962	17.2193	59.9273	3.21501	3.96648	10.7295	49.2513
														XPO1	23.4013	15.4314	14.2356	65.58	17.6115	12.4125	11.5752	62.662	17.5409	11.2591	9.92946	52.2422
														Protein Methylation
														PRMT1	32.0876	27.0437	96.3632	603.72	39.2109	49.7653	72.6375	505.344	43.8745	43.3274	72.6364	458.494
														CHTOP	29.4841	36.1968	69.7384	120.469	34.7842	34.0441	58.9856	93.2416	38.9884	32.0198	45.4605	95.9909
														CARM1	12.6155	11.3192	11.2481	79.9214	20.8081	14.3968	9.63253	67.4785	21.1071	17.9014	8.69191	63.9141
														PRMT5	8.54896	5.75457	28.0941	99.1997	9.04063	7.47965	20.3809	87.3398	6.96275	6.59996	19.9804	84.1673
														Other
														TRIM28	77.7745	112.01	147.679	411.898	94.568	136.67	180.526	312.753	87.5546	105.341	111.466	278.816
														Other
														AEN	10.4696	12.769	80.7981	57.1513	14.2638	15.1823	53.6229	47.9737	13.6251	14.9782	50.6746	46.1637
														AATF	25.9537	21.8451	38.5379	101.793	33.4328	36.0463	29.1398	100.204	32.7854	29.8767	29.6785	92.1013
														NAP1L4	28.824	30.5906	28.5775	60.5647	29.7494	28.2251	35.9291	64.3301	29.9749	23.9554	32.0423	57.4841

[truncated: 2 more sheets: PROTEASOME, OTHER]
